# Supplementary material for: A rapid and convenient sample treatment method based on the dissolvable polyacrylamide gel for S-acylation proteomics
Source: Royal Society of Chemistry journal article supplement (doi:10.1039/d4ay00937a), 2024-01-01
Supplement: d4ay00937a1.xlsx [file d4ay00937a1.xlsx]

## Sheet: Supplementary Table 1
Supplementary Table 1: Article on the analysis of S-acylated proteome based on the classic ABE method.
No.	Article	Year	Journal	Method name	Sample source	Starting amount	Scale	Note
1	Global analysis of protein palmitoylation in yeast	2006	Cell	ABE	Saccharomyces cerevisiae	6 x 1010 log-phase yeast cells	47=12(known)+35(Novel)proteins
2	Neural palmitoyl-proteomics reveals dynamic synaptic palmitoylation	2008	Nature	ABE	rat cultured embryonic neurons and synaptosomes	60-70 x 106 neurons and six whole adult rat brains	177=64(known)+113(Novel) proteins
3	Identification of CKAP4/p63 as a Major Substrate of the Palmitoyl Acyltransferase DHHC2, a Putative Tumor Suppressor, Using a Novel Proteomics Method	2008	MCP	PICA	Hela cells	400 ug protein	57 sites in 50 proteins of ZDHHC2 substrates
4	Proteome Scale Characterization of Human S-Acylated Proteins in Lipid Raft-enriched and Non-raft Membranes	2010	MCP	PalmPISC	DU145 cells	unknown (according to No.1)	398=67(known)+331(Novel)proteins 168=25(known)+143(Novel)sites
5	Proteomic analysis of palmitoylated platelet proteins	2011	Blood	PalmPISC	human platelets	100 mg platelet membranes	215=51(known)+61(other known)+103(Novel)proteins
6	Proteomic Profiling of S-acylated Macrophage Proteins Identifies a Role for Palmitoylation in Mitochondrial Targeting of Phospholipid Scramblase 3	2011	MCP	ABE	RAW 264.7 macrophage	5 x 107 macrophages	80 proteins
7	Site-specific analysis of protein S-acylation by resin-assisted capture	2011	J Lipid Res	RAC	HEK293 cells	10-20 mg proteins	93 sites
8	Global Analysis of Protein Palmitoylation in African Trypanosomes	2011	Eukaryot Cell	ABE	African Trypanosomes brucei	3.2 x 109 cells	124 proteins
9	Proteomic Analysis of S-Acylated Proteins in Human B Cells Reveals Palmitoylation of the Immune Regulators CD20 and CD23	2012	PLoS One	ABE	human B lymphocytes	200 x 106 B cells	148=53(known)+95(Novel)proteins
10	Endothelial Cell Palmitoylproteomic Identifies Novel Lipid-Modified Targets and Potential Substrates for Protein Acyl Transferases	2012	Circ Res	ABE	human EA.hy 926 endothelial cells	2-8 mg proteins	157 proteins
11	A proteomic approach identifies many novel palmitoylated proteins in Arabidopsis	2013	New Phytol	ABE	Arabidopsis thaliana	5 mg proteins	581 proteins
12	Proteomic analysis of protein palmitoylation in adipocytes	2013	Adipocyte	RAC	mouse adipose tissue and 3T3-L1 adipocytes	unknown	856 proteins
13	Tracking brain palmitoylation change: predominance of glial change in a mouse model of Huntington's disease	2013	Chem Biol	ABE	mouse brain	3.7 mg proteins	320 proteins Hip14 mouse/295 proteins YAC128 mouse
14	Insulin-regulated protein palmitoylation impacts endothelial cell function	2014	Arterioscler Thromb Vasc Biol	ABE	human umbilical vein endothelial cells (HUVECs)	unkonwn	382 proteins
15	Analysis of the brain palmitoylproteome using both acyl-biotin exchange and acyl-resin-assisted capture methods	2017	scientific reports	ABE+RAC	rat brain	20 mg proteins	241 proteins (ABE)/144 protein (RAC)
16	Global, site-specific analysis of neuronal protein S-acylation	2017	scientific reports	ssABE	Mouse forebrain tissue membrane protein	2 mg protein	906 sites on 641 proteins
17	Proteomic Analysis of S-Palmitoylated Proteins in Ocular Lens Reveals Palmitoylation of AQP5 and MP20	2018	Invest Ophthalmol Vis Sci	ABE	lens fiber cells	unknown (according to No.1)	174 proteins
18	Stress-induced Changes in the S-palmitoylation and S-nitrosylation of Synaptic Proteins	2019	MCP	ABE	postsynaptic density proteins in a mouse model of chronic stress	unknown (according to No.1)	813 sites on 465 proteins
19	Global identification of S-palmitoylated proteins and detection of palmitoylating (DHHC) enzymes in heart	2021	J Mol Cell Cardiol	RAC	human, dog, and rat hearts	3 samples combined	454 proteins
20	Proteome-wide identification of palmitoylated proteins in mouse testis	2022	Reprod Sci	ABE	mouse testis	300 ug protein	4883 proteins	The sample was separated into 10 fractions using a modifed High-pHRP method
21	A Modified Acyl-RAC Method of Isolating Retinal Palmitoyl Proteome for Subsequent Detection through LC-MS/MS	2023	Bio Protoc	RAC	mouse retinae	4 mouse retinae	30 proteins

## Sheet: Supplementary Table 2
Supplementary Table 2: The LFQ data of CCC samples.
The potential S-acylated proteins are highlighted in red and bold font, and the other proteins are displayed in normal font.
Protein Group	Top	Accession	Significance	Coverage (%)	#Peptides	#Unique	PTM	ctrl1 Area	ctrl2 Area	ctrl3 Area	ctrl avg	exp1 Area	exp2 Area	exp3 Area	exp avg	FC	p-value	Avg. Mass	Description
1702	TRUE	Q8BY89|CTL2_MOUSE	18.74	3.4	3	3		513.26	519.988	998.815	677.355	1692.52	1594	1622.71	1636.41	2.41589	0.00420647	80110	Choline transporter-like protein 2 OS=Mus musculus OX=10090 GN=Slc44a2 PE=1 SV=2
3213	TRUE	F7BWT7|TSN15_MOUSE	30	2.72	1	1		86.2938	89.1215	95.1544	90.1899	202.809	188.909	157.002	182.906	2.02801	0.00256174	33071	Tetraspanin-15 OS=Mus musculus OX=10090 GN=Tspan15 PE=1 SV=2
3186	TRUE	Q6PFX7|NYAP1_MOUSE	47.84	2.04	2	2		184.301	144.978	172.968	167.416	1146.97	1074.71	1198.19	1139.96	6.80914	1.33798e-05	87668	Neuronal tyrosine-phosphorylated phosphoinositide-3-kinase adapter 1 OS=Mus musculus OX=10090 GN=Nyap1 PE=1 SV=1
741	TRUE	P21278|GNA11_MOUSE	41.32	20.06	12	7		2870.1	2529.92	2614.94	2671.65	5862.33	6319.1	6579.2	6253.54	2.3407	0.000104688	42024	Guanine nucleotide-binding protein subunit alpha-11 OS=Mus musculus OX=10090 GN=Gna11 PE=1 SV=1
1869	TRUE	Q9D3A9|TTYH1_MOUSE	42.34	11.11	4	4	Oxidation (M)	3418.14	3518.86	2805.48	3247.49	14955.2	14731.4	13054	14246.9	4.38704	6.72419e-05	49032	Protein tweety homolog 1 OS=Mus musculus OX=10090 GN=Ttyh1 PE=1 SV=1
1049	TRUE	P60904|DNJC5_MOUSE	65.03	59.09	10	10		2378.95	2692.19	2662.3	2577.81	42873.2	45428.3	44628.1	44309.9	17.1889	6.62443e-07	22101	DnaJ homolog subfamily C member 5 OS=Mus musculus OX=10090 GN=Dnajc5 PE=1 SV=1
2313	TRUE	Q62442|VAMP1_MOUSE	18.51	14.41	2	1		320.591	545.128	595.67	487.13	1022.04	1061.04	1087.3	1056.79	2.16943	0.00276914	12890	Vesicle-associated membrane protein 1 OS=Mus musculus OX=10090 GN=Vamp1 PE=1 SV=1
920	TRUE	Q61885|MOG_MOUSE	67.57	27.64	10	10	Oxidation (M)	17935.9	18188.7	17779.8	17968.1	64786.5	61505.6	62978.4	63090.2	3.51123	1.20639e-06	28271	Myelin-oligodendrocyte glycoprotein OS=Mus musculus OX=10090 GN=Mog PE=1 SV=1
2296	TRUE	O55074|AKA7A_MOUSE	32.51	27.16	4	4		328.434	610.731	299.634	412.933	3606.08	3740.58	3685.71	3677.46	8.9057	6.78685e-06	9169	A-kinase anchor protein 7 isoform alpha OS=Mus musculus OX=10090 GN=Akap7 PE=1 SV=4
2317	TRUE	O89051|ITM2B_MOUSE	21.16	15.04	3	3		214.833	318.023	295.039	275.965	509.8	727.912	581.053	606.255	2.19685	0.0098491	30260	Integral membrane protein 2B OS=Mus musculus OX=10090 GN=Itm2b PE=1 SV=1
2690	TRUE	P35762|CD81_MOUSE	39.38	11.86	2	2	Oxidation (M)	649.351	399.545	467.662	505.519	4490.88	4190.47	4653.42	4444.92	8.79279	1.41404e-05	25815	CD81 antigen OS=Mus musculus OX=10090 GN=Cd81 PE=1 SV=2
2002	TRUE	A1L3P4|SL9A6_MOUSE	27.39	6.98	4	4		426.319	300.839	276.289	334.483	924.398	840.004	933.241	899.215	2.68837	0.000512732	77953	Sodium/hydrogen exchanger 6 OS=Mus musculus OX=10090 GN=Slc9a6 PE=1 SV=1
3264	TRUE	A2BIM8|MUP18_MOUSE	41.34	6.08	1	1		18.6569	18.6569	18.6569	18.6569	166.173	128.127	64.8644	119.721	6.41702	0.0267648	20763	Major urinary protein 18 OS=Mus musculus OX=10090 GN=Mup18 PE=3 SV=1
1573	TRUE	Q62283|TSN7_MOUSE	62.32	16.47	4	4	Oxidation (M)	7064.68	7153.61	7012.88	7077.05	15376.2	16067.1	15627.7	15690.4	2.21708	1.95693e-06	27544	Tetraspanin-7 OS=Mus musculus OX=10090 GN=Tspan7 PE=1 SV=2
530	TRUE	P46097|SYT2_MOUSE	40.93	7.58	11	3		859.403	724.425	862.615	815.481	2376.14	2432.72	2210.9	2339.92	2.86938	4.61053e-05	47263	Synaptotagmin-2 OS=Mus musculus OX=10090 GN=Syt2 PE=1 SV=1
2688	TRUE	Q9D6G9|CKLF5_MOUSE	30.9	25	3	3		674.466	381.333	500.154	518.651	2306.45	2293	2203.96	2267.8	4.3725	4.31645e-05	17389	CKLF-like MARVEL transmembrane domain-containing protein 5 OS=Mus musculus OX=10090 GN=Cmtm5 PE=1 SV=1
319	TRUE	Q6WQJ1|DGLA_MOUSE	33.52	18.01	19	19		404.369	721.919	720.462	615.583	4800.25	4504.26	4674.58	4659.7	7.56957	7.62725e-06	115375	Diacylglycerol lipase-alpha OS=Mus musculus OX=10090 GN=Dagla PE=1 SV=2
3264	TRUE	P11588|MUP1_MOUSE	41.34	6.11	1	1		18.6569	18.6569	18.6569	18.6569	166.173	128.127	64.8644	119.721	6.41702	0.0267648	20648	Major urinary protein 1 OS=Mus musculus OX=10090 GN=Mup1 PE=1 SV=1
2631	TRUE	Q9JIG8|PRAF2_MOUSE	43.19	16.29	3	3		849.309	1010.57	1004.1	954.658	3297.23	2990.83	3240.33	3176.13	3.32699	3.28178e-05	19478	PRA1 family protein 2 OS=Mus musculus OX=10090 GN=Praf2 PE=1 SV=1
2097	TRUE	O08530|S1PR1_MOUSE	23.56	8.9	3	3		645.948	763	1036.49	815.144	2073.68	2446.79	3432.6	2651.02	3.25221	0.012109	42639	Sphingosine 1-phosphate receptor 1 OS=Mus musculus OX=10090 GN=S1pr1 PE=1 SV=3
1926	TRUE	Q9QZB1|RGS20_MOUSE	17.97	14.64	3	3		502.032	550.918	1119.46	724.135	1937.67	1721.39	2201.55	1953.54	2.69775	0.00707563	26986	Regulator of G-protein signaling 20 OS=Mus musculus OX=10090 GN=Rgs20 PE=1 SV=1
391	TRUE	O35526|STX1A_MOUSE	58.08	42.01	17	14	Oxidation (M)	16787.9	16811.6	16117.4	16572.3	36543.9	38060.6	37638	37414.2	2.25763	2.07568e-06	33054	Syntaxin-1A OS=Mus musculus OX=10090 GN=Stx1a PE=1 SV=3
535	TRUE	Q8K021|SCAM1_MOUSE	56.04	29.88	10	10	Oxidation (M)	3726.28	3341.05	3376.87	3481.4	13751.6	13638.3	13677.8	13689.2	3.93209	1.44894e-07	38029	Secretory carrier-associated membrane protein 1 OS=Mus musculus OX=10090 GN=Scamp1 PE=1 SV=1
501	TRUE	D3YVF0|AKAP5_MOUSE	26.93	20.27	10	10	Oxidation (M)	513.488	700.517	937.002	717.002	2478.53	2365.3	2410.22	2418.02	3.3724	0.000179044	79397	A-kinase anchor protein 5 OS=Mus musculus OX=10090 GN=Akap5 PE=1 SV=2
1875	TRUE	Q60610|TIAM1_MOUSE	19.29	0.69	2	1		186.949	165.005	165.066	172.34	650.225	786.932	330.986	589.381	3.41987	0.0368376	177533	Rho guanine nucleotide exchange factor TIAM1 OS=Mus musculus OX=10090 GN=Tiam1 PE=1 SV=1
2057	TRUE	Q9D164|FXYD6_MOUSE	33.89	15.96	2	2		298.439	295.818	598.409	397.555	4558.87	5429.69	5511.78	5166.78	12.9964	0.000119492	10374	FXYD domain-containing ion transport regulator 6 OS=Mus musculus OX=10090 GN=Fxyd6 PE=1 SV=2
1780	TRUE	Q91VK4|ITM2C_MOUSE	42.83	18.96	5	5		284.813	290.89	257.257	277.653	962.335	1186.18	1022.6	1057.04	3.80704	0.000324498	30482	Integral membrane protein 2C OS=Mus musculus OX=10090 GN=Itm2c PE=1 SV=2
2571	TRUE	Q9JKD3|SCAM5_MOUSE	51.6	11.91	3	3		5689.44	5742.91	6024.36	5818.9	17695.4	19360.8	19811.1	18955.8	3.25762	3.57676e-05	26068	Secretory carrier-associated membrane protein 5 OS=Mus musculus OX=10090 GN=Scamp5 PE=1 SV=1
3968	TRUE	Q9ERN0|SCAM2_MOUSE	49.64	3.65	1	1		176.233	167.776	172.036	172.015	465.783	438.346	492.598	465.576	2.7066	5.00221e-05	36465	Secretory carrier-associated membrane protein 2 OS=Mus musculus OX=10090 GN=Scamp2 PE=1 SV=1
2165	TRUE	Q9D428|GOG7B_MOUSE	47.38	23.35	4	4	Acetylation (Protein N-term)	410.588	520.297	405.86	445.582	3069.48	3039.22	3081.07	3063.26	6.87474	3.07752e-07	18335	Golgin subfamily A member 7B OS=Mus musculus OX=10090 GN=GOLGA7B PE=1 SV=1
3899	TRUE	Q8BG21|FLOWR_MOUSE	44.56	5.26	1	1		18.6569	18.6569	18.6569	18.6569	76.1159	47.4441	97.0102	73.5234	3.94082	0.0187961	18343	Calcium channel flower homolog OS=Mus musculus OX=10090 GN=Cacfd1 PE=1 SV=1
1131	TRUE	Q61411|RASH_MOUSE	39.34	14.81	7	3		4992.01	5853	5626.61	5490.54	11342.7	12024.2	11808.3	11725.1	2.13551	4.45086e-05	21298	GTPase HRas OS=Mus musculus OX=10090 GN=Hras PE=1 SV=2
1023	TRUE	Q6X893|CTL1_MOUSE	20.59	12.56	8	8		1288.11	2190.14	2438.09	1972.12	4843.14	5480	4738.5	5020.55	2.54577	0.0019006	73067	Choline transporter-like protein 1 OS=Mus musculus OX=10090 GN=Slc44a1 PE=1 SV=3
3264	TRUE	B5X0G2|MUP17_MOUSE	41.34	6.11	1	1		18.6569	18.6569	18.6569	18.6569	166.173	128.127	64.8644	119.721	6.41702	0.0267648	20638	Major urinary protein 17 OS=Mus musculus OX=10090 GN=Mup17 PE=2 SV=2
2635	TRUE	Q8R4V2|DUS15_MOUSE	12.65	5.53	1	1		18.6569	57.133	18.6569	31.4822	108.796	210.092	152.048	156.979	4.98626	0.0172677	26186	Dual specificity protein phosphatase 15 OS=Mus musculus OX=10090 GN=Dusp15 PE=1 SV=3
129	TRUE	P60879|SNP25_MOUSE	74.82	65.05	17	16	Acetylation (Protein N-term); Oxidation (M)	24601.8	25269.9	25856.4	25242.7	152585	151789	154795	153056	6.06339	1.9845e-08	23315	Synaptosomal-associated protein 25 OS=Mus musculus OX=10090 GN=Snap25 PE=1 SV=1
3921	TRUE	Q8K299|SCAR5_MOUSE	48.35	2.24	1	1		18.6569	18.6569	18.6569	18.6569	491.955	277.585	626.102	465.214	24.9352	0.0116922	53667	Scavenger receptor class A member 5 OS=Mus musculus OX=10090 GN=Scara5 PE=1 SV=1
2899	TRUE	Q3UZP4|SVIP_MOUSE	17.59	32.47	2	2		160.943	356.036	134.387	217.122	686.93	574.485	707.432	656.282	3.02264	0.00565649	8364	Small VCP/p97-interacting protein OS=Mus musculus OX=10090 GN=Svip PE=3 SV=1
1116	TRUE	P35802|GPM6A_MOUSE	73.46	19.78	7	7	Acetylation (Protein N-term); Oxidation (M)	32281.6	32405	32364.3	32350.3	195258	189943	184448	189883	5.86959	9.21727e-07	31149	Neuronal membrane glycoprotein M6-a OS=Mus musculus OX=10090 GN=Gpm6a PE=1 SV=1
788	TRUE	P06837|NEUM_MOUSE	57.05	58.15	10	10		3404.45	3724.35	3350.32	3493.04	16785.5	17762.2	17890.5	17479.4	5.00407	2.85963e-06	23632	Neuromodulin OS=Mus musculus OX=10090 GN=Gap43 PE=1 SV=1
108	FALSE	Q9ER60|SCN4A_MOUSE	50.38	0.6	3	1		1128.98	1040.71	1112.47	1094.05	2310.83	2354.22	2392.6	2352.55	2.15031	3.97147e-06	208798	Sodium channel protein type 4 subunit alpha OS=Mus musculus OX=10090 GN=Scn4a PE=1 SV=1
3838	TRUE	Q8CA71|SHSA4_MOUSE	24.44	4.57	1	1		302.978	587.461	232.889	374.442	1773	1937.29	1968.15	1892.81	5.05502	0.000256903	21483	Protein shisa-4 OS=Mus musculus OX=10090 GN=Shisa4 PE=1 SV=1
1684	TRUE	O35609|SCAM3_MOUSE	52.42	15.19	4	4		1271.03	1287.2	1403.08	1320.44	4905.18	4995.74	5387.48	5096.14	3.85943	1.63091e-05	38458	Secretory carrier-associated membrane protein 3 OS=Mus musculus OX=10090 GN=Scamp3 PE=1 SV=3
3680	TRUE	Q9CQG9|TM100_MOUSE	64.7	8.21	1	1		18.6569	18.6569	18.6569	18.6569	52.9584	63.0619	64.7815	60.2673	3.2303	0.000351633	14504	Transmembrane protein 100 OS=Mus musculus OX=10090 GN=Tmem100 PE=1 SV=1
525	TRUE	Q9Z0P4|PALM_MOUSE	59.27	47	15	14	Acetylation (Protein N-term); Oxidation (M)	2574.15	2396.02	2581.62	2517.27	13506	13966.1	12795.6	13422.6	5.33219	6.0274e-06	41614	Paralemmin-1 OS=Mus musculus OX=10090 GN=Palm PE=1 SV=1
2113	TRUE	Q8BGR6|ARL15_MOUSE	30.55	14.71	3	3		891.16	657.201	834.452	794.271	2009.02	2158.11	1827.18	1998.1	2.51564	0.000534463	22905	ADP-ribosylation factor-like protein 15 OS=Mus musculus OX=10090 GN=Arl15 PE=1 SV=1
2601	TRUE	P97412|LYST_MOUSE	51.75	0.18	1	1		1622.96	1488.53	1518.4	1543.3	5860.6	6572.92	6552.74	6328.75	4.1008	3.59133e-05	425287	Lysosomal-trafficking regulator OS=Mus musculus OX=10090 GN=Lyst PE=1 SV=1
2061	TRUE	Q8VHW2|CCG8_MOUSE	47.19	19.15	4	4		1524.87	1715	1492.9	1577.59	4404.76	4344.58	4397.54	4382.29	2.77784	2.57578e-06	43453	Voltage-dependent calcium channel gamma-8 subunit OS=Mus musculus OX=10090 GN=Cacng8 PE=1 SV=1
2375	TRUE	Q9JIZ9|PLS3_MOUSE	37.29	5.07	2	2		259.206	265.384	383.999	302.863	1620.63	1853.91	1815.41	1763.32	5.82217	6.07973e-05	31803	Phospholipid scramblase 3 OS=Mus musculus OX=10090 GN=Plscr3 PE=1 SV=1
1001	TRUE	P22723|GBRG2_MOUSE	33.76	18.35	10	10		1298.34	1027.85	1230.23	1185.47	2754.66	3026.47	3285.6	3022.25	2.5494	0.000450267	55098	Gamma-aminobutyric acid receptor subunit gamma-2 OS=Mus musculus OX=10090 GN=Gabrg2 PE=1 SV=3
748	TRUE	Q920M7|SYT17_MOUSE	31.7	11.28	5	5		504.188	530.912	435.999	490.367	1036.65	910.305	1053.4	1000.12	2.03953	0.000666637	53293	Synaptotagmin-17 OS=Mus musculus OX=10090 GN=Syt17 PE=1 SV=1
292	TRUE	Q60634|FLOT2_MOUSE	35.73	37.62	17	17		1863.99	1556.19	1957.67	1792.61	4577.9	5070.32	5419.79	5022.67	2.80187	0.000290662	47038	Flotillin-2 OS=Mus musculus OX=10090 GN=Flot2 PE=1 SV=2
1378	TRUE	Q924S8|SPRE1_MOUSE	25.47	17.34	7	7		700.629	381.413	411.33	497.791	1630.27	1682.65	1727.62	1680.18	3.37527	0.000362273	50664	Sprouty-related, EVH1 domain-containing protein 1 OS=Mus musculus OX=10090 GN=Spred1 PE=1 SV=1
1351	TRUE	Q8BLE7|VGLU2_MOUSE	34.07	13.4	8	7		2169.96	2044.35	1759.47	1991.26	4360	4341.07	4940.34	4547.13	2.28355	0.000380385	64561	Vesicular glutamate transporter 2 OS=Mus musculus OX=10090 GN=Slc17a6 PE=1 SV=1
2070	TRUE	Q923Z0|GPC5B_MOUSE	35.36	9.27	3	3		574.661	514.915	498.329	529.302	1493.37	1205.34	1275.41	1324.71	2.50275	0.000895916	45899	G-protein coupled receptor family C group 5 member B OS=Mus musculus OX=10090 GN=Gprc5b PE=1 SV=1
593	TRUE	B5TVM2|ILDR2_MOUSE	42.26	24.81	14	14		915.716	960.943	730.808	869.156	4142.65	3979.32	3881.17	4001.04	4.60337	7.18248e-06	73235	Immunoglobulin-like domain-containing receptor 2 OS=Mus musculus OX=10090 GN=Ildr2 PE=1 SV=2
2205	TRUE	Q5SXY1|CYTSB_MOUSE	16.89	1.41	2	2		1813.32	2292.92	958.601	1688.28	4612.75	3990.71	4131.44	4244.97	2.51437	0.00412738	118101	Cytospin-B OS=Mus musculus OX=10090 GN=Specc1 PE=1 SV=2
1363	TRUE	Q9JJY3|NSMA2_MOUSE	24.3	12.98	7	7		1572.99	1796.16	1035.06	1468.07	4705.04	4292.54	3751.2	4249.6	2.89468	0.00146051	71197	Sphingomyelin phosphodiesterase 3 OS=Mus musculus OX=10090 GN=Smpd3 PE=1 SV=1
3264	TRUE	P04938|MUP11_MOUSE	41.34	6.08	1	1		18.6569	18.6569	18.6569	18.6569	166.173	128.127	64.8644	119.721	6.41702	0.0267648	20763	Major urinary protein 11 OS=Mus musculus OX=10090 GN=Mup11 PE=1 SV=2
197	TRUE	P46096|SYT1_MOUSE	73.98	29.93	20	12	Oxidation (M)	40691.8	41444.8	41920.3	41352.3	108362	108640	108321	108441	2.62237	5.63605e-09	47418	Synaptotagmin-1 OS=Mus musculus OX=10090 GN=Syt1 PE=1 SV=1
1722	TRUE	Q9QXW9|LAT2_MOUSE	26.13	4.52	3	3		496.447	690.333	756.29	647.69	1538.07	1558.07	1491.37	1529.17	2.36096	0.000394082	57873	Large neutral amino acids transporter small subunit 2 OS=Mus musculus OX=10090 GN=Slc7a8 PE=1 SV=1
320	TRUE	P61264|STX1B_MOUSE	56.13	47.22	20	17	Oxidation (M)	39079.7	39262.5	36322.9	38221.7	113440	116489	118380	116103	3.03763	1.43865e-06	33245	Syntaxin-1B OS=Mus musculus OX=10090 GN=Stx1b PE=1 SV=1
3264	TRUE	P11589|MUP2_MOUSE	41.34	6.11	1	1		18.6569	18.6569	18.6569	18.6569	166.173	128.127	64.8644	119.721	6.41702	0.0267648	20664	Major urinary protein 2 OS=Mus musculus OX=10090 GN=Mup2 PE=1 SV=1
3685	TRUE	Q8BHJ6|SERC5_MOUSE	12.04	2.17	1	1		284.291	65.3699	287.636	212.432	603.237	692.823	575.153	623.738	2.93617	0.0072952	51831	Serine incorporator 5 OS=Mus musculus OX=10090 GN=Serinc5 PE=2 SV=1
2881	TRUE	Q8K4E0|ALMS1_MOUSE	48.57	0.31	1	1		605.818	639.309	620.426	621.851	3254.72	4113.32	3709.39	3692.47	5.93787	0.000245301	360215	Centrosome-associated protein ALMS1 OS=Mus musculus OX=10090 GN=Alms1 PE=1 SV=2
472	TRUE	P27601|GNA13_MOUSE	36.28	27.06	13	11	Oxidation (M)	1343.88	1125.76	1473.95	1314.53	3472.61	3668.36	3617.81	3586.26	2.72816	4.19061e-05	44055	Guanine nucleotide-binding protein subunit alpha-13 OS=Mus musculus OX=10090 GN=Gna13 PE=1 SV=1
1070	TRUE	Q9R0N5|SYT5_MOUSE	24.26	5.7	5	2		211.082	166.761	285.535	221.126	530.258	639.583	593.743	587.861	2.65849	0.00145111	43130	Synaptotagmin-5 OS=Mus musculus OX=10090 GN=Syt5 PE=1 SV=1
2564	TRUE	Q99JG2|G37L1_MOUSE	44.06	5.2	3	3		3507.09	4057.6	4354.14	3972.94	14310.2	15293.5	15333.3	14979	3.77025	1.21978e-05	52729	G-protein coupled receptor 37-like 1 OS=Mus musculus OX=10090 GN=Gpr37l1 PE=1 SV=2
2433	TRUE	Q60766|IRGM1_MOUSE	50.43	2.44	1	1		18.6569	18.6569	18.6569	18.6569	154.035	89.8173	99.3997	114.417	6.13272	0.00872577	46552	Immunity-related GTPase family M protein 1 OS=Mus musculus OX=10090 GN=Irgm1 PE=1 SV=1
3075	TRUE	Q9QY42|GPR37_MOUSE	15.58	2.17	1	1		99.1821	316.069	317.641	244.297	772.642	811.949	811.592	798.728	3.26949	0.00167349	66775	Prosaposin receptor GPR37 OS=Mus musculus OX=10090 GN=Gpr37 PE=2 SV=1
2174	TRUE	Q9EPL2|CSTN1_MOUSE	12.6	2.86	3	3		2235.22	2205.5	994.513	1811.74	2937.17	4150.93	4288.14	3792.08	2.09306	0.0288074	108900	Calsyntenin-1 OS=Mus musculus OX=10090 GN=Clstn1 PE=1 SV=1
2777	TRUE	Q9DB75|CDIP1_MOUSE	30.81	4.33	1	1		339.756	463.679	237.111	346.848	2399.32	2102.33	1910.06	2137.24	6.16187	0.000334487	21835	Cell death-inducing p53-target protein 1 OS=Mus musculus OX=10090 GN=Cdip1 PE=2 SV=1
2946	TRUE	Q8BJU2|TSN9_MOUSE	30.51	10.88	2	2		169.664	145.071	147.281	154.006	336.899	468.978	409.074	404.984	2.62967	0.00299414	26738	Tetraspanin-9 OS=Mus musculus OX=10090 GN=Tspan9 PE=1 SV=1
1732	TRUE	Q7M759|AB17B_MOUSE	16.9	11.46	3	3		640.59	274.197	296.709	403.832	1068.31	955.418	1083.12	1035.61	2.56447	0.00725615	32201	Alpha/beta hydrolase domain-containing protein 17B OS=Mus musculus OX=10090 GN=Abhd17b PE=1 SV=1
3812	TRUE	P01868|IGHG1_MOUSE	58.9	3.09	1	1		18.6569	18.6569	18.6569	18.6569	118.877	95.6365	84.7683	99.7608	5.34713	0.0012856	35705	Ig gamma-1 chain C region secreted form OS=Mus musculus OX=10090 GN=Ighg1 PE=1 SV=1
1529	TRUE	Q91W53|GOGA7_MOUSE	22.13	35.04	5	5	Acetylation (Protein N-term)	740.532	806.931	569.204	705.556	1927.36	2047.78	1324.05	1766.4	2.50355	0.0106775	15792	Golgin subfamily A member 7 OS=Mus musculus OX=10090 GN=Golga7 PE=1 SV=1
2289	TRUE	P40237|CD82_MOUSE	22.23	16.17	4	4		1609.76	1583.05	815.72	1336.18	4444.12	4112.02	4152.23	4236.12	3.17033	0.000494574	29629	CD82 antigen OS=Mus musculus OX=10090 GN=Cd82 PE=1 SV=1
2299	TRUE	Q924S7|SPRE2_MOUSE	41.93	9.51	3	3		352.89	366.286	386.182	368.453	901.127	785.262	848.183	844.857	2.29299	0.000165984	46794	Sprouty-related, EVH1 domain-containing protein 2 OS=Mus musculus OX=10090 GN=Spred2 PE=1 SV=1
439	TRUE	Q6ZQ18|EFR3B_MOUSE	42.91	19.95	15	14		1295.4	1318.97	1479.36	1364.58	3997.84	3888.3	3536.35	3807.5	2.79024	8.47995e-05	92406	Protein EFR3 homolog B OS=Mus musculus OX=10090 GN=Efr3b PE=1 SV=2
2573	TRUE	Q5GH67|XKR4_MOUSE	36.57	3.25	1	1		221.9	238.049	178.831	212.927	914.15	981.779	769.105	888.345	4.17207	0.000489486	71503	XK-related protein 4 OS=Mus musculus OX=10090 GN=Xkr4 PE=1 SV=1
2456	TRUE	Q921C1|CXG3_MOUSE	28.88	14.5	3	3		415.378	439.814	534.695	463.296	1022.69	1040.01	1306.64	1123.12	2.42419	0.00261748	30293	Gap junction gamma-3 protein OS=Mus musculus OX=10090 GN=Gjc3 PE=1 SV=2
2212	TRUE	P70280|VAMP7_MOUSE	30.12	17.27	4	4		460.043	436.89	603.011	499.981	1406.24	1211.55	1243.66	1287.15	2.57439	0.000585684	24967	Vesicle-associated membrane protein 7 OS=Mus musculus OX=10090 GN=Vamp7 PE=1 SV=1
2757	TRUE	Q66L44|CBARP_MOUSE	20.14	3.15	2	2		211.015	120.57	100.646	144.077	377.071	419.314	376.677	391.021	2.71397	0.00256414	74131	Voltage-dependent calcium channel beta subunit-associated regulatory protein OS=Mus musculus OX=10090 GN=Cbarp PE=1 SV=4
3706	TRUE	D3Z2X2|DNHD1_MOUSE	25.02	0.17	1	1		999.971	1057.07	761.828	939.621	1853.69	2367.64	2507.37	2242.9	2.38703	0.00395701	536436	Dynein heavy chain domain-containing protein 1 OS=Mus musculus OX=10090 GN=Dnhd1 PE=1 SV=3
3785	TRUE	Q8K353|CYTM1_MOUSE	20.01	9.62	1	1		335.175	64.8697	101.641	167.229	1212.66	1326.64	1216.34	1251.88	7.48602	0.000302991	11402	Cysteine-rich and transmembrane domain-containing protein 1 OS=Mus musculus OX=10090 GN=Cystm1 PE=1 SV=1
2012	TRUE	Q6ZQI3|MLEC_MOUSE	24.31	6.87	2	2		358.472	367.148	603.72	443.114	1182.67	1323.85	1200.04	1235.52	2.78827	0.000991232	32342	Malectin OS=Mus musculus OX=10090 GN=Mlec PE=1 SV=2
2260	TRUE	Q9D8B7|JAM3_MOUSE	19.85	10.97	3	3		354.501	545.257	985.343	628.367	2151.93	2281.98	2246.18	2226.7	3.54362	0.00111019	34838	Junctional adhesion molecule C OS=Mus musculus OX=10090 GN=Jam3 PE=1 SV=2
2007	TRUE	Q3TFQ1|SPRY7_MOUSE	23.91	17.86	3	3		356.997	760.432	511.156	542.862	1833.03	2332.99	1942.12	2036.05	3.75058	0.0014729	21681	SPRY domain-containing protein 7 OS=Mus musculus OX=10090 GN=Spryd7 PE=1 SV=2
2830	TRUE	P56213|ALR_MOUSE	27.31	16.16	2	2		126.581	88.2671	75.4969	96.7817	315.291	325.016	277.955	306.087	3.16266	0.000570088	22877	FAD-linked sulfhydryl oxidase ALR OS=Mus musculus OX=10090 GN=Gfer PE=1 SV=2
3967	TRUE	O88838|SPSB2_MOUSE	24.57	3.41	1	1		5858.02	1453.88	3576.83	3629.58	38476.2	38719.6	39339	38844.9	10.7023	1.09519e-05	28938	SPRY domain-containing SOCS box protein 2 OS=Mus musculus OX=10090 GN=Spsb2 PE=1 SV=1
2095	TRUE	Q01149|CO1A2_MOUSE	31.4	2.55	3	3		357.941	392.834	318.763	356.513	743.703	934.362	911.786	863.284	2.42146	0.00136325	129557	Collagen alpha-2(I) chain OS=Mus musculus OX=10090 GN=Col1a2 PE=1 SV=2
1404	TRUE	Q99MX7|T121B_MOUSE	47.18	13.46	6	6		879.176	801.645	867.88	849.567	4210.61	4491.27	5256.17	4652.68	5.47653	0.000264478	58158	Transmembrane protein 121B OS=Mus musculus OX=10090 GN=Tmem121b PE=1 SV=1
1198	TRUE	Q9CS42|PRPS2_MOUSE	23.95	6.92	6	2		245.491	308.415	187.659	247.188	807.893	1528.82	895.46	1077.39	4.35859	0.0224983	34786	Ribose-phosphate pyrophosphokinase 2 OS=Mus musculus OX=10090 GN=Prps2 PE=1 SV=4
839	TRUE	P60202|MYPR_MOUSE	29.85	25.63	8	8	N-ethylmaleimide on cysteines; Oxidation (M); acrylamide	210009	150870	235096	198658	650077	630754	765850	682227	3.43417	0.00059229	30077	Myelin proteolipid protein OS=Mus musculus OX=10090 GN=Plp1 PE=1 SV=2
2532	TRUE	Q8R4E6|PURG_MOUSE	55.42	4.57	2	2		216.846	188.308	200.681	201.945	1510.2	1354.43	1450.07	1438.23	7.1219	1.14936e-05	39938	Purine-rich element-binding protein gamma OS=Mus musculus OX=10090 GN=Purg PE=1 SV=1
3264	TRUE	P11591|MUP5_MOUSE	41.34	6.11	1	1		18.6569	18.6569	18.6569	18.6569	166.173	128.127	64.8644	119.721	6.41702	0.0267648	20933	Major urinary protein 5 OS=Mus musculus OX=10090 GN=Mup5 PE=2 SV=2
2915	TRUE	Q9QZB0|RGS17_MOUSE	27.82	3.81	1	1		460.541	262.042	603.28	441.954	2970.45	3024	2496.87	2830.44	6.40437	0.000252782	24345	Regulator of G-protein signaling 17 OS=Mus musculus OX=10090 GN=Rgs17 PE=1 SV=1
1518	TRUE	Q9D2P8|MOBP_MOUSE	49.33	22.35	4	4	Oxidation (M)	3016.68	3974.66	3966.05	3652.47	43472.4	41766	43316	42851.4	11.7322	4.01154e-07	19197	Myelin-associated oligodendrocyte basic protein OS=Mus musculus OX=10090 GN=Mobp PE=1 SV=1
4014	TRUE	Q9JKV5|SCAM4_MOUSE	40.18	4.78	1	1		186.328	241.944	233.603	220.625	872.37	957.396	850.903	893.556	4.05011	5.28323e-05	25342	Secretory carrier-associated membrane protein 4 OS=Mus musculus OX=10090 GN=Scamp4 PE=1 SV=1
3812	TRUE	P01869|IGH1M_MOUSE	58.9	2.54	1	1		18.6569	18.6569	18.6569	18.6569	118.877	95.6365	84.7683	99.7608	5.34713	0.0012856	43386	Ig gamma-1 chain C region, membrane-bound form OS=Mus musculus OX=10090 GN=Ighg1 PE=1 SV=2
2120	TRUE	O35874|SATT_MOUSE	32.32	5.83	3	3		592.242	523.733	638.775	584.917	1282.64	1157.03	1393.92	1277.86	2.18469	0.000808697	56062	Neutral amino acid transporter A OS=Mus musculus OX=10090 GN=Slc1a4 PE=1 SV=1
2253	TRUE	P12657|ACM1_MOUSE	21.67	8.04	3	3		376.729	861.088	448.198	562.005	1975.73	1795.99	2159.31	1977.01	3.51777	0.00153223	51379	Muscarinic acetylcholine receptor M1 OS=Mus musculus OX=10090 GN=Chrm1 PE=1 SV=2
1583	TRUE	P11087|CO1A1_MOUSE	28.23	5.3	7	7	Oxidation (M)	1318.31	1503.65	1055.2	1292.39	3021.88	3221.46	2807.34	3016.89	2.33436	0.00061754	138032	Collagen alpha-1(I) chain OS=Mus musculus OX=10090 GN=Col1a1 PE=1 SV=4
2150	TRUE	Q9JJ69|KCIP2_MOUSE	19.01	3.33	3	1		79.4936	79.3297	59.8238	72.8824	144.251	155.99	265.616	188.619	2.58799	0.0418506	30946	Kv channel-interacting protein 2 OS=Mus musculus OX=10090 GN=Kcnip2 PE=1 SV=2
2296	TRUE	Q7TN79|AKA7G_MOUSE	32.51	7.01	4	4		328.434	610.731	299.634	412.933	3606.08	3740.58	3685.71	3677.46	8.9057	6.78685e-06	35482	A-kinase anchor protein 7 isoform gamma OS=Mus musculus OX=10090 GN=Akap7 PE=1 SV=2
3264	TRUE	P02762|MUP6_MOUSE	41.34	6.11	1	1		18.6569	18.6569	18.6569	18.6569	166.173	128.127	64.8644	119.721	6.41702	0.0267648	20649	Major urinary protein 6 OS=Mus musculus OX=10090 GN=Mup6 PE=1 SV=2
1773	TRUE	Q9QXV8|SPY2_MOUSE	41.53	19.05	5	5		513.566	438.624	407.516	453.236	1533.4	1713.33	1650	1632.24	3.60132	4.32857e-05	34623	Protein sprouty homolog 2 OS=Mus musculus OX=10090 GN=Spry2 PE=1 SV=1
280	TRUE	O08917|FLOT1_MOUSE	39.76	47.2	19	19	Oxidation (M)	2471.99	2551.06	2363.75	2462.27	5280.73	6299.13	5906.41	5828.75	2.36723	0.000366042	47513	Flotillin-1 OS=Mus musculus OX=10090 GN=Flot1 PE=1 SV=1
1795	TRUE	Q60771|CLD11_MOUSE	44.04	14.98	4	4	Oxidation (M)	15442.7	15630.6	15013.8	15362.3	49622.7	42252.4	42422.6	44765.9	2.914	0.000270068	22114	Claudin-11 OS=Mus musculus OX=10090 GN=Cldn11 PE=1 SV=1
168	TRUE	P13595|NCAM1_MOUSE	69.63	26.64	25	25	Oxidation (M)	12629.5	12690.7	12483.3	12601.2	31496.3	31838.2	30835.3	31389.9	2.49103	3.93025e-07	119427	Neural cell adhesion molecule 1 OS=Mus musculus OX=10090 GN=Ncam1 PE=1 SV=3
522	TRUE	P35803|GPM6B_MOUSE	52.69	25.91	9	9	Acetylation (Protein N-term); Oxidation (M)	9011.18	8790.79	8746.03	8849.33	64494	53821.7	55009.6	57775.1	6.52876	0.000132103	36210	Neuronal membrane glycoprotein M6-b OS=Mus musculus OX=10090 GN=Gpm6b PE=1 SV=2
1591	TRUE	E9PUL5|PRRT2_MOUSE	58.06	19.36	5	5	Acetylation (Protein N-term); Oxidation (M)	1475.3	1450.5	1306.7	1410.84	15914.7	16198.9	14312.9	15475.5	10.969	1.82908e-05	35924	Proline-rich transmembrane protein 2 OS=Mus musculus OX=10090 GN=Prrt2 PE=1 SV=1
243	TRUE	Q80U28|MADD_MOUSE	21.32	9.51	12	12		1806.55	1730.82	1636.8	1724.72	1105.02	1286.16	966.593	1119.26	0.64895	0.00444916	175180	MAP kinase-activating death domain protein OS=Mus musculus OX=10090 GN=Madd PE=1 SV=2
1687	TRUE	P14576|SRP54_MOUSE	0.01	8.53	4	4		484.124	540.882	439.903	488.303	514.297	485.979	460.509	486.928	0.997184	0.968852	55721	Signal recognition particle subunit SRP54 OS=Mus musculus OX=10090 GN=Srp54 PE=1 SV=2
2570	TRUE	Q8CGA0|PPM1F_MOUSE	1.19	1.99	1	1		189.172	77.5481	74.8586	113.859	106.494	126.235	110.318	114.349	1.0043	0.990381	49611	Protein phosphatase 1F OS=Mus musculus OX=10090 GN=Ppm1f PE=1 SV=1
356	TRUE	Q6A065|CE170_MOUSE	0.84	10.01	15	13		1053.78	1049.36	1194.75	1099.3	945.949	1250.76	1196.33	1131.01	1.02885	0.778277	175050	Centrosomal protein of 170 kDa OS=Mus musculus OX=10090 GN=Cep170 PE=1 SV=2
1274	TRUE	P58404|STRN4_MOUSE	9.5	7.37	6	5		1825.66	2527.57	1935.77	2096.34	1746.98	1453.1	883.93	1361.34	0.649389	0.0927158	81645	Striatin-4 OS=Mus musculus OX=10090 GN=Strn4 PE=1 SV=2
1966	TRUE	Q9DCS9|NDUBA_MOUSE	47.08	17.05	3	3		7584.78	8266.16	8400.7	8083.88	2740.75	2645.98	2424.55	2603.76	0.322093	3.44689e-05	21024	NADH dehydrogenase [ubiquinone] 1 beta subcomplex subunit 10 OS=Mus musculus OX=10090 GN=Ndufb10 PE=1 SV=3
1595	TRUE	Q9R1P1|PSB3_MOUSE	26.96	37.56	6	6		7954.98	6801.19	7171.42	7309.19	2126.05	2602.22	3372.56	2700.28	0.369436	0.000755313	22965	Proteasome subunit beta type-3 OS=Mus musculus OX=10090 GN=Psmb3 PE=1 SV=1
1335	TRUE	Q62245|SOS1_MOUSE	12.38	1.44	2	2		474.052	465.259	605.071	514.794	286.444	438.646	281.874	335.655	0.652018	0.0591887	150883	Son of sevenless homolog 1 OS=Mus musculus OX=10090 GN=Sos1 PE=1 SV=2
824	TRUE	Q8K0S0|PHYIP_MOUSE	61.11	19.7	10	8	Oxidation (M)	20081.9	20015.2	19801.6	19966.2	10271.4	9904.44	9890.68	10022.2	0.501956	3.15357e-07	37555	Phytanoyl-CoA hydroxylase-interacting protein OS=Mus musculus OX=10090 GN=Phyhip PE=1 SV=1
2746	TRUE	Q9D2R0|AACS_MOUSE	9.09	1.93	1	1		208.129	194.02	121.21	174.453	109.739	127.859	124.669	120.756	0.692195	0.122627	75200	Acetoacetyl-CoA synthetase OS=Mus musculus OX=10090 GN=Aacs PE=1 SV=1
3730	TRUE	Q8CBH7|MARHB_MOUSE	1.19	2	1	1		639.377	632.284	653.591	641.751	633.318	715.013	538.052	628.794	0.979811	0.813823	44223	E3 ubiquitin-protein ligase MARCHF11 OS=Mus musculus OX=10090 GN=Marchf11 PE=2 SV=2
444	TRUE	O70161|PI51C_MOUSE	22.87	26.93	16	13		4382.21	3841.53	4688.71	4304.15	1288.53	2117.28	1922.05	1775.95	0.412614	0.00199038	72408	Phosphatidylinositol 4-phosphate 5-kinase type-1 gamma OS=Mus musculus OX=10090 GN=Pip5k1c PE=1 SV=2
1742	TRUE	Q8C6G8|WDR26_MOUSE	13.28	4.06	3	3		186.329	192.673	155.846	178.283	153.104	141.379	141.111	145.198	0.814424	0.0514204	70543	WD repeat-containing protein 26 OS=Mus musculus OX=10090 GN=Wdr26 PE=1 SV=3
614	TRUE	Q78PY7|SND1_MOUSE	10.17	15.6	13	13		1043.34	823.102	977.453	947.967	522.469	404.054	865.294	597.272	0.630056	0.0835625	102088	Staphylococcal nuclease domain-containing protein 1 OS=Mus musculus OX=10090 GN=Snd1 PE=1 SV=1
3468	TRUE	P60840|ENSA_MOUSE	19.4	9.09	1	1		182.524	269.454	259.621	237.2	123.725	68.8853	92.6661	95.0922	0.400895	0.0110146	13335	Alpha-endosulfine OS=Mus musculus OX=10090 GN=Ensa PE=1 SV=1
121	TRUE	P47857|PFKAM_MOUSE	41.34	38.59	29	26	Oxidation (M)	24260.3	24054.8	24382.1	24232.4	19775.4	19745.4	19048	19522.9	0.805653	5.14465e-05	85269	ATP-dependent 6-phosphofructokinase, muscle type OS=Mus musculus OX=10090 GN=Pfkm PE=1 SV=3
1367	TRUE	Q925E7|2ABD_MOUSE	7.73	2.43	4	1		355.057	344.001	462.69	387.249	100.08	288.435	300.711	229.742	0.593266	0.104157	51957	Serine/threonine-protein phosphatase 2A 55 kDa regulatory subunit B delta isoform OS=Mus musculus OX=10090 GN=Ppp2r2d PE=1 SV=1
1196	TRUE	Q8R5C5|ACTY_MOUSE	19.71	12.5	7	3		1168.45	1124.73	1290.31	1194.5	420.759	581.127	254.288	418.725	0.350545	0.00189247	42281	Beta-centractin OS=Mus musculus OX=10090 GN=Actr1b PE=1 SV=1
2944	TRUE	P46467|VPS4B_MOUSE	27.1	2.7	1	1		312.462	283.037	315.643	303.714	200.672	193.849	166.241	186.921	0.61545	0.00138819	49419	Vacuolar protein sorting-associated protein 4B OS=Mus musculus OX=10090 GN=Vps4b PE=1 SV=2
813	TRUE	Q3UYC0|PPM1H_MOUSE	30.66	25.93	11	11		3340.76	3562.49	3578.5	3493.92	1849.9	1862.63	1478.72	1730.42	0.495265	0.00027993	56380	Protein phosphatase 1H OS=Mus musculus OX=10090 GN=Ppm1h PE=1 SV=1
1821	TRUE	Q99JP7|GGT7_MOUSE	48.03	3.63	3	3		7518.75	7738.67	7600.07	7619.16	4418.14	4412.17	4680.94	4503.75	0.591108	9.05662e-06	70251	Glutathione hydrolase 7 OS=Mus musculus OX=10090 GN=Ggt7 PE=1 SV=2
4043	TRUE	Q8BFW7|LPP_MOUSE	36.98	2.45	1	1		18.6569	111.366	65.0561	65.0263	18.6569	18.6569	18.6569	18.6569	0.286913	0.158199	65891	Lipoma-preferred partner homolog OS=Mus musculus OX=10090 GN=Lpp PE=1 SV=1
1623	TRUE	P42208|SEPT2_MOUSE	37.57	14.13	5	5		1422.93	1513.83	1388.07	1441.61	584.374	669.895	546.551	600.273	0.416391	8.7388e-05	41526	Septin-2 OS=Mus musculus OX=10090 GN=Septin2 PE=1 SV=2
1230	FALSE	Q8BFY9|TNPO1_MOUSE	25.54	3.23	3	3		648.044	692.427	727.047	689.173	518.325	518.135	465.872	500.777	0.726636	0.00280946	102357	Transportin-1 OS=Mus musculus OX=10090 GN=Tnpo1 PE=1 SV=2
90	TRUE	P50446|K2C6A_MOUSE	81.64	2.17	37	2		40241.8	39301.2	39859.8	39800.9	6919.98	6893.02	6752.97	6855.32	0.17224	3.03948e-08	59335	Keratin, type II cytoskeletal 6A OS=Mus musculus OX=10090 GN=Krt6a PE=1 SV=3
192	TRUE	P63318|KPCG_MOUSE	51.13	29.99	20	19	Oxidation (M)	33211.5	34377.7	34790.2	34126.5	21724.2	22095.8	21718.9	21846.3	0.640158	1.49196e-05	78358	Protein kinase C gamma type OS=Mus musculus OX=10090 GN=Prkcg PE=1 SV=1
1062	TRUE	P63242|IF5A1_MOUSE	18.97	11.04	6	3		7016.39	6746.51	5628.16	6463.69	1910.73	2258.02	3784.37	2651.04	0.410144	0.00596681	16832	Eukaryotic translation initiation factor 5A-1 OS=Mus musculus OX=10090 GN=Eif5a PE=1 SV=2
1135	TRUE	Q99PT1|GDIR1_MOUSE	79.02	36.76	7	7		8157.73	8160.41	8209.64	8175.92	2892.68	2859.05	2926.36	2892.69	0.353806	3.37675e-09	23407	Rho GDP-dissociation inhibitor 1 OS=Mus musculus OX=10090 GN=Arhgdia PE=1 SV=3
457	TRUE	P23818|GRIA1_MOUSE	1.28	12.9	16	12		2199.97	1929.47	2730.55	2286.66	2524.5	2383.24	2163.76	2357.17	1.03083	0.797884	101569	Glutamate receptor 1 OS=Mus musculus OX=10090 GN=Gria1 PE=1 SV=1
938	TRUE	P27612|PLAP_MOUSE	3.92	7.68	5	5		697.364	600.623	557.829	618.605	458.066	447.518	716.517	540.701	0.874064	0.467595	87221	Phospholipase A-2-activating protein OS=Mus musculus OX=10090 GN=Plaa PE=1 SV=4
301	TRUE	Q8BIK4|DOCK9_MOUSE	15.38	4.72	10	9		732.432	778.977	861.114	790.841	975.055	973.544	895.909	948.169	1.19894	0.0264203	235312	Dedicator of cytokinesis protein 9 OS=Mus musculus OX=10090 GN=Dock9 PE=1 SV=2
2238	TRUE	Q80XG9|LRRT4_MOUSE	11.67	1.36	1	1		101.861	96.7265	63.8621	87.4832	64.3382	50.6922	57.2978	57.4427	0.656615	0.0746882	67148	Leucine-rich repeat transmembrane neuronal protein 4 OS=Mus musculus OX=10090 GN=Lrrtm4 PE=1 SV=2
1230	TRUE	Q99LG2|TNPO2_MOUSE	22.28	7.44	6	6		1069.16	1032.12	1150.97	1084.08	666.576	741.05	542.341	649.989	0.599576	0.00305055	100456	Transportin-2 OS=Mus musculus OX=10090 GN=Tnpo2 PE=1 SV=1
2092	TRUE	O35459|ECH1_MOUSE	0.88	9.17	2	2		248.787	202.022	71.4028	174.071	511.321	95.7742	118.95	242.015	1.39033	0.663534	36118	Delta(3,5)-Delta(2,4)-dienoyl-CoA isomerase, mitochondrial OS=Mus musculus OX=10090 GN=Ech1 PE=1 SV=1
2524	TRUE	Q8BGN8|SYNPR_MOUSE	18.51	3.02	1	1		1843.7	1716.64	1531.22	1697.19	838.906	471.361	890.206	733.491	0.43218	0.00383627	29228	Synaptoporin OS=Mus musculus OX=10090 GN=Synpr PE=1 SV=1
283	TRUE	O55131|SEPT7_MOUSE	54.11	40.14	17	16	Oxidation (M)	37922.8	37724.6	37471.9	37706.4	19751.6	20958.4	20402.4	20370.8	0.540247	1.27295e-06	50550	Septin-7 OS=Mus musculus OX=10090 GN=Septin7 PE=1 SV=1
152	TRUE	Q9Z1G4|VPP1_MOUSE	48.72	27.18	26	24	N-ethylmaleimide on cysteines; Oxidation (M)	42146.3	43117.2	42013.9	42425.8	30856	31747.4	31465.6	31356.3	0.739086	1.4306e-05	96467	V-type proton ATPase 116 kDa subunit a 1 OS=Mus musculus OX=10090 GN=Atp6v0a1 PE=1 SV=3
672	TRUE	O54983|CRYM_MOUSE	46.16	33.87	11	11	Oxidation (M)	8509.46	8687.95	8583.64	8593.69	3968.37	4384.38	3982.48	4111.74	0.478461	6.68545e-06	33523	Ketimine reductase mu-crystallin OS=Mus musculus OX=10090 GN=Crym PE=1 SV=1
2248	TRUE	Q924L1|LTMD1_MOUSE	24.38	9.17	3	3		526.077	655.131	620.857	600.689	371.539	402.657	394.657	389.618	0.648618	0.00602287	41701	LETM1 domain-containing protein 1 OS=Mus musculus OX=10090 GN=Letmd1 PE=1 SV=1
2754	TRUE	Q8K097|LFG2_MOUSE	4.84	7.26	1	1		64.2899	85.5172	74.0906	74.6326	63.3847	206.41	101.194	123.663	1.65695	0.320048	35258	Protein lifeguard 2 OS=Mus musculus OX=10090 GN=Faim2 PE=2 SV=1
296	TRUE	P06151|LDHA_MOUSE	64.88	37.05	14	14	Oxidation (M)	52297.2	53681.9	52715.8	52898.3	29791.1	30094.3	29691.1	29858.8	0.564457	7.09808e-07	36499	L-lactate dehydrogenase A chain OS=Mus musculus OX=10090 GN=Ldha PE=1 SV=3
2734	TRUE	P23591|FCL_MOUSE	5.97	5.92	2	2		121.883	2537.17	227.849	962.301	1482.32	1427.7	1353.66	1421.23	1.4769	0.591963	35878	GDP-L-fucose synthase OS=Mus musculus OX=10090 GN=Gfus PE=1 SV=3
401	TRUE	Q8BMJ2|SYLC_MOUSE	34.66	9.51	11	11		1371.33	1351.29	1586.45	1436.36	703.12	730.91	775.592	736.541	0.512784	0.000861278	134192	Leucine--tRNA ligase, cytoplasmic OS=Mus musculus OX=10090 GN=Lars1 PE=1 SV=2
1046	TRUE	Q61081|CDC37_MOUSE	27.3	16.89	6	6	Oxidation (M)	3417.87	3283.17	3458.01	3386.35	1167.47	1076.06	1657.22	1300.25	0.383967	0.000375309	44593	Hsp90 co-chaperone Cdc37 OS=Mus musculus OX=10090 GN=Cdc37 PE=1 SV=1
1806	TRUE	Q52KF3|SPIR1_MOUSE	7.46	1.67	1	1		273.699	314.568	238.199	275.489	97.016	281.061	26.8546	134.977	0.489955	0.149703	68450	Protein spire homolog 1 OS=Mus musculus OX=10090 GN=Spire1 PE=1 SV=1
1109	TRUE	Q05BC3|EMAL1_MOUSE	18.37	3.07	2	2		615.76	505.634	554.708	558.701	317.138	325.069	426.347	356.185	0.637523	0.0129618	89680	Echinoderm microtubule-associated protein-like 1 OS=Mus musculus OX=10090 GN=Eml1 PE=1 SV=1
1921	TRUE	Q9QUM9|PSA6_MOUSE	40.07	21.14	5	5		4831.09	5361.03	5433.15	5208.42	2072.29	2313.3	2345.27	2243.62	0.430767	0.000141912	27372	Proteasome subunit alpha type-6 OS=Mus musculus OX=10090 GN=Psma6 PE=1 SV=1
941	TRUE	Q6IME9|K2C72_MOUSE	37.51	2.31	8	1		6327.63	7163.79	6641.54	6710.99	4019.09	3857.41	4039.15	3971.88	0.591848	0.00039765	56750	Keratin, type II cytoskeletal 72 OS=Mus musculus OX=10090 GN=Krt72 PE=3 SV=1
2577	TRUE	Q6PCP5|MFF_MOUSE	14.36	7.9	2	2		485.003	270.072	431.227	395.434	228.523	219.705	211.938	220.055	0.55649	0.0536223	32931	Mitochondrial fission factor OS=Mus musculus OX=10090 GN=Mff PE=1 SV=1
2221	TRUE	P63024|VAMP3_MOUSE	17.95	15.53	3	1	Acetylation (Protein N-term)	65.1421	72.2196	86.843	74.7349	106.106	156.466	133.602	132.058	1.76702	0.0226474	11480	Vesicle-associated membrane protein 3 OS=Mus musculus OX=10090 GN=Vamp3 PE=1 SV=1
935	TRUE	Q6R891|NEB2_MOUSE	0.31	4.77	4	4		5260.07	716.024	5215.3	3730.46	3003.07	2905.92	2708.83	2872.6	0.77004	0.600271	89520	Neurabin-2 OS=Mus musculus OX=10090 GN=Ppp1r9b PE=1 SV=1
1901	TRUE	P70318|TIAR_MOUSE	1.23	5.61	2	2		305.82	423.02	122.724	283.855	224.811	178.542	266.908	223.42	0.787094	0.543073	43389	Nucleolysin TIAR OS=Mus musculus OX=10090 GN=Tial1 PE=1 SV=1
1406	TRUE	P08226|APOE_MOUSE	29.05	21.86	6	6		1016.94	973.75	844.856	945.181	468.561	538.961	437.693	481.738	0.509679	0.00148858	35867	Apolipoprotein E OS=Mus musculus OX=10090 GN=Apoe PE=1 SV=2
1119	TRUE	P97797|SHPS1_MOUSE	42.58	19.3	7	7	Oxidation (M)	6355.73	6174.54	6625.47	6385.24	2119.31	1981.85	2402.09	2167.75	0.339494	1.9748e-05	56414	Tyrosine-protein phosphatase non-receptor type substrate 1 OS=Mus musculus OX=10090 GN=Sirpa PE=1 SV=2
1683	TRUE	Q8R191|SNG3_MOUSE	25.61	19.65	4	4	Acetylation (Protein N-term)	13498.7	13619.3	13098.7	13405.6	9569.24	10744	10695.7	10336.3	0.771046	0.00177918	24561	Synaptogyrin-3 OS=Mus musculus OX=10090 GN=Syngr3 PE=1 SV=1
1445	TRUE	Q80TQ2|CYLD_MOUSE	14.51	2.42	2	2		735.922	1013.64	675.893	808.486	257.075	251.773	546.809	351.886	0.435241	0.032812	106586	Ubiquitin carboxyl-terminal hydrolase CYLD OS=Mus musculus OX=10090 GN=Cyld PE=1 SV=2
1345	TRUE	Q6ZQ58|LARP1_MOUSE	4.74	3.17	3	3		692.689	621.173	490.299	601.387	425.932	567.417	555.787	516.379	0.858647	0.318191	121125	La-related protein 1 OS=Mus musculus OX=10090 GN=Larp1 PE=1 SV=3
2428	TRUE	O70274|TP4A2_MOUSE	8.9	8.38	1	1		514.543	539.3	350.748	468.197	353.204	125.902	299.059	259.388	0.554015	0.0823835	19127	Protein tyrosine phosphatase type IVA 2 OS=Mus musculus OX=10090 GN=Ptp4a2 PE=1 SV=1
932	FALSE	Q1RLL3|CPNE9_MOUSE	10.45	6.87	4	3		976.455	905.781	1083.52	988.587	793.651	881.47	609.655	761.592	0.770385	0.0758476	61852	Copine-9 OS=Mus musculus OX=10090 GN=Cpne9 PE=1 SV=1
1817	TRUE	Q9JKC6|CEND_MOUSE	28.68	24.83	4	4		3219.21	3085.52	3052.9	3119.21	2711.02	2634.47	2710.97	2685.49	0.860952	0.001592	14987	Cell cycle exit and neuronal differentiation protein 1 OS=Mus musculus OX=10090 GN=Cend1 PE=1 SV=1
1241	TRUE	Q9Z2C4|MTMR1_MOUSE	12.04	1.2	1	1		294.825	391.086	328.369	338.093	228.45	235.042	293.357	252.283	0.746193	0.0700267	75313	Myotubularin-related protein 1 OS=Mus musculus OX=10090 GN=Mtmr1 PE=1 SV=1
835	TRUE	Q9ERK4|XPO2_MOUSE	18.47	10.81	9	9		1122.9	1150.49	1382	1218.46	666.149	397.612	670.937	578.233	0.474559	0.0063242	110455	Exportin-2 OS=Mus musculus OX=10090 GN=Cse1l PE=1 SV=1
2017	TRUE	P45591|COF2_MOUSE	14.52	8.43	3	1		273.392	388.44	469.306	377.046	231.638	186.149	128.074	181.954	0.482578	0.0385515	18710	Cofilin-2 OS=Mus musculus OX=10090 GN=Cfl2 PE=1 SV=1
2487	TRUE	O35841|API5_MOUSE	1.06	3.77	2	2		178.495	300.218	257.107	245.274	248.926	237.143	201.543	229.204	0.934483	0.696897	56785	Apoptosis inhibitor 5 OS=Mus musculus OX=10090 GN=Api5 PE=1 SV=2
1055	TRUE	Q8BH55|THNS1_MOUSE	5.6	6.83	5	5		944.36	1104.29	912.941	987.196	1083.91	726.596	450.312	753.605	0.76338	0.292208	83100	Threonine synthase-like 1 OS=Mus musculus OX=10090 GN=Thnsl1 PE=1 SV=1
884	TRUE	P41216|ACSL1_MOUSE	11.78	11.16	8	7	Acetylation (Protein N-term)	591.111	618.109	727.989	645.736	559.295	524.841	551.1	545.079	0.84412	0.079913	77951	Long-chain-fatty-acid--CoA ligase 1 OS=Mus musculus OX=10090 GN=Acsl1 PE=1 SV=2
367	TRUE	Q8K2B3|SDHA_MOUSE	62.22	21.69	16	16	Oxidation (M)	17906.8	17951.3	17659.4	17839.1	11243.4	11486.9	11367.6	11366	0.637137	5.93055e-07	72585	Succinate dehydrogenase [ubiquinone] flavoprotein subunit, mitochondrial OS=Mus musculus OX=10090 GN=Sdha PE=1 SV=1
1928	TRUE	Q64336|TBR1_MOUSE	11.32	4.7	2	2		257.841	385.321	240.142	294.435	192.09	199.549	211.042	200.894	0.682303	0.112107	73940	T-box brain protein 1 OS=Mus musculus OX=10090 GN=Tbr1 PE=1 SV=2
2166	TRUE	Q3KNM2|MARH5_MOUSE	26.87	12.59	3	3		2670.01	2115.96	2442.85	2409.61	1131.86	1387.5	1131.37	1216.91	0.505024	0.00280503	31232	E3 ubiquitin-protein ligase MARCHF5 OS=Mus musculus OX=10090 GN=Marchf5 PE=1 SV=1
1968	TRUE	Q9D898|ARP5L_MOUSE	41.65	38.56	5	5		3167.63	2855.29	3251.99	3091.64	870.483	680.925	755.548	768.985	0.248731	6.24771e-05	16980	Actin-related protein 2/3 complex subunit 5-like protein OS=Mus musculus OX=10090 GN=Arpc5l PE=1 SV=1
2069	TRUE	P61460|DEPD5_MOUSE	9.17	1.45	2	2		65.4901	62.6037	72.6066	66.9002	929.676	1015.74	64.8428	670.087	10.0162	0.117932	180379	GATOR complex protein DEPDC5 OS=Mus musculus OX=10090 GN=Depdc5 PE=1 SV=2
103	TRUE	Q6VNB8|WDFY3_MOUSE	4.13	6.7	23	23		1372.9	912.39	1203.87	1163.05	763.764	1045.46	1144.93	984.718	0.846665	0.369226	392338	WD repeat and FYVE domain-containing protein 3 OS=Mus musculus OX=10090 GN=Wdfy3 PE=1 SV=1
1624	TRUE	Q6P8X1|SNX6_MOUSE	16.45	2.46	1	1		181.573	176.399	126.871	161.614	57.342	96.9411	86.8473	80.3768	0.497337	0.0182967	46649	Sorting nexin-6 OS=Mus musculus OX=10090 GN=Snx6 PE=1 SV=2
490	TRUE	P51830|ADCY9_MOUSE	15.4	9.68	12	12		2512.55	2426.96	2688.57	2542.69	2875.28	2901.46	2758.53	2845.09	1.11893	0.0270079	150954	Adenylate cyclase type 9 OS=Mus musculus OX=10090 GN=Adcy9 PE=1 SV=1
943	TRUE	Q61361|PGCB_MOUSE	9.65	9.06	8	8		23334.8	23703.8	24150.6	23729.8	15791.1	15716.7	4949.02	12152.3	0.512112	0.0326642	95815	Brevican core protein OS=Mus musculus OX=10090 GN=Bcan PE=1 SV=2
1685	TRUE	P60122|RUVB1_MOUSE	22.07	10.31	4	4		959.657	992.882	1062.2	1004.91	669.16	455.48	498.668	541.103	0.538457	0.00297042	50214	RuvB-like 1 OS=Mus musculus OX=10090 GN=Ruvbl1 PE=1 SV=1
1605	TRUE	Q8CHU3|EPN2_MOUSE	18.02	12.27	7	6		1596.77	1806.65	1441.94	1615.12	459.486	772.814	896.365	709.555	0.439321	0.00567469	63472	Epsin-2 OS=Mus musculus OX=10090 GN=Epn2 PE=1 SV=1
2158	TRUE	P53612|PGTB2_MOUSE	27.32	9.44	3	3		701.252	688.293	745.993	711.846	351.083	347.031	446.976	381.697	0.536207	0.000876111	37803	Geranylgeranyl transferase type-2 subunit beta OS=Mus musculus OX=10090 GN=Rabggtb PE=1 SV=2
3407	TRUE	Q8K358|PIGU_MOUSE	12.51	2.53	1	1		91.887	93.3679	82.7495	89.3348	62.0254	78.6347	50.868	63.8427	0.714645	0.0431465	49804	Phosphatidylinositol glycan anchor biosynthesis class U protein OS=Mus musculus OX=10090 GN=Pigu PE=1 SV=4
546	TRUE	P30275|KCRU_MOUSE	62.23	25.6	12	12	Oxidation (M)	81421.1	81707.8	80430.6	81186.5	38918.7	39449.1	37839.9	38735.9	0.477122	2.57886e-07	47004	Creatine kinase U-type, mitochondrial OS=Mus musculus OX=10090 GN=Ckmt1 PE=1 SV=1
3220	TRUE	P63250|KCNJ3_MOUSE	28.37	3.79	2	2		392.942	393.574	357.522	381.346	203.039	211.898	162.418	192.452	0.504665	0.000615481	56573	G protein-activated inward rectifier potassium channel 1 OS=Mus musculus OX=10090 GN=Kcnj3 PE=1 SV=1
2861	TRUE	Q8C031|LRC4C_MOUSE	11.45	1.41	1	1		116.765	140.567	149.828	135.72	18.6569	105.354	80.0121	68.0076	0.501087	0.0698997	71992	Leucine-rich repeat-containing protein 4C OS=Mus musculus OX=10090 GN=Lrrc4c PE=1 SV=2
3178	TRUE	O70480|VAMP4_MOUSE	32.21	9.93	1	1		196.102	187.34	185.03	189.491	348.442	430.598	355.221	378.087	1.99528	0.00207289	16353	Vesicle-associated membrane protein 4 OS=Mus musculus OX=10090 GN=Vamp4 PE=1 SV=1
504	TRUE	P31938|MP2K1_MOUSE	35.67	23.41	13	10	Oxidation (M)	12875.5	14877.6	14874	14209	7001.76	6166.61	6884.62	6684.33	0.470428	0.000463624	43474	Dual specificity mitogen-activated protein kinase kinase 1 OS=Mus musculus OX=10090 GN=Map2k1 PE=1 SV=2
2213	TRUE	P54763|EPHB2_MOUSE	4.66	1.83	2	1		107.526	77.2278	211.591	132.115	86.9626	63.917	107.793	86.2244	0.652647	0.342173	109899	Ephrin type-B receptor 2 OS=Mus musculus OX=10090 GN=Ephb2 PE=1 SV=3
3778	TRUE	Q9ET43|CLD12_MOUSE	3.6	6.15	1	1		26.0793	120.364	85.508	77.3172	90.4316	88.5032	113.442	97.4588	1.26051	0.521028	26995	Claudin-12 OS=Mus musculus OX=10090 GN=Cldn12 PE=1 SV=2
2116	TRUE	Q68FD9|K1549_MOUSE	0.65	2.16	4	4		422.947	448.866	372.792	414.868	479.962	438.573	356.441	424.992	1.0244	0.823903	209221	UPF0606 protein KIAA1549 OS=Mus musculus OX=10090 GN=Kiaa1549 PE=1 SV=3
2705	TRUE	P97792|CXAR_MOUSE	5.58	3.56	1	1		665.638	632.497	472.712	590.283	49.1384	479.047	472.079	333.421	0.564851	0.170934	39948	Coxsackievirus and adenovirus receptor homolog OS=Mus musculus OX=10090 GN=Cxadr PE=1 SV=1
1464	TRUE	Q9D2U9|H2B3A_MOUSE	7.12	7.14	4	1		537.619	458.568	522.357	506.181	427.319	367.75	112.562	302.544	0.597698	0.110176	13994	H2B.U histone 2 OS=Mus musculus OX=10090 GN=H2bu2 PE=1 SV=3
749	TRUE	P27546|MAP4_MOUSE	30.73	11.64	10	10		4163.99	4462.85	4624.05	4416.96	2954.99	2777.54	2554.02	2762.18	0.625358	0.000742029	117429	Microtubule-associated protein 4 OS=Mus musculus OX=10090 GN=Map4 PE=1 SV=3
2648	TRUE	Q9CZX0|ELP3_MOUSE	54.23	1.83	1	1		89.9544	64.9484	97.7014	84.2014	18.6569	18.6569	18.6569	18.6569	0.221574	0.00268176	62385	Elongator complex protein 3 OS=Mus musculus OX=10090 GN=Elp3 PE=1 SV=1
3614	TRUE	P29595|NEDD8_MOUSE	21.01	17.28	1	1		412.346	395.69	250.896	352.978	153.605	103.936	138.809	132.117	0.374292	0.0143682	8972	NEDD8 OS=Mus musculus OX=10090 GN=Nedd8 PE=1 SV=2
2310	TRUE	Q5HZI9|S2551_MOUSE	14.03	5.7	2	2		334.766	412.813	314.346	353.975	236.705	184.435	274.776	231.972	0.655334	0.0375279	33689	Mitochondrial nicotinamide adenine dinucleotide transporter SLC25A51 OS=Mus musculus OX=10090 GN=Slc25a51 PE=1 SV=1
2387	TRUE	Q60649|CLPB_MOUSE	6.13	1.62	1	1		157.996	170.74	177.562	168.766	417.219	208.817	169.352	265.129	1.57099	0.279527	76004	Caseinolytic peptidase B protein homolog OS=Mus musculus OX=10090 GN=Clpb PE=1 SV=1
984	TRUE	Q791T5|MTCH1_MOUSE	19.55	14.91	6	6	Oxidation (M)	4070.84	3408.76	3568.83	3682.81	2933.95	2518.98	2591.98	2681.64	0.728151	0.0134177	41565	Mitochondrial carrier homolog 1 OS=Mus musculus OX=10090 GN=Mtch1 PE=1 SV=1
2428	TRUE	Q63739|TP4A1_MOUSE	15.1	12.72	2	2		710.764	678.306	594.918	661.329	488.568	292.367	415.825	398.92	0.603209	0.0171756	19815	Protein tyrosine phosphatase type IVA 1 OS=Mus musculus OX=10090 GN=Ptp4a1 PE=1 SV=1
1739	TRUE	Q9JMC3|DNJA4_MOUSE	14.25	9.57	4	4		1326.78	993.691	928.915	1083.13	553.382	756.874	742.865	684.374	0.63185	0.0461263	44902	DnaJ homolog subfamily A member 4 OS=Mus musculus OX=10090 GN=Dnaja4 PE=1 SV=1
51	TRUE	Q5H8C4|VP13A_MOUSE	11.42	10.83	30	30		1359.29	1638.07	1947.44	1648.27	2250.59	1988.22	2160	2132.94	1.29405	0.0601016	359401	Intermembrane lipid transfer protein VPS13A OS=Mus musculus OX=10090 GN=Vps13a PE=1 SV=1
10	FALSE	P21271|MYO5B_MOUSE	23.09	2.53	5	5		7662.39	7550.5	7615.12	7609.34	9182.97	8415.79	8775.27	8791.34	1.15534	0.00618068	210570	Unconventional myosin-Vb OS=Mus musculus OX=10090 GN=Myo5b PE=1 SV=2
2489	TRUE	Q6IR34|GPSM1_MOUSE	20.76	3.27	2	2		177.278	131.095	229.365	179.246	54.4049	69.6995	80.0794	68.0613	0.379708	0.0192944	74362	G-protein-signaling modulator 1 OS=Mus musculus OX=10090 GN=Gpsm1 PE=1 SV=3
685	TRUE	P97351|RS3A_MOUSE	22.39	35.23	10	10		5196.42	3928.64	5988.45	5037.84	2299.79	2597.63	2538.15	2478.52	0.491982	0.0134981	29885	40S ribosomal protein S3a OS=Mus musculus OX=10090 GN=Rps3a PE=1 SV=3
1959	TRUE	P12815|PDCD6_MOUSE	21.3	21.99	4	4		903.626	917.497	618.954	813.359	373.062	375.97	442.86	397.297	0.488465	0.0141002	21867	Programmed cell death protein 6 OS=Mus musculus OX=10090 GN=Pdcd6 PE=1 SV=2
934	TRUE	Q61166|MARE1_MOUSE	42.71	25.75	8	6	Acetylation (Protein N-term)	1642.73	1820.89	1674.26	1712.63	772.467	783.008	706.818	754.097	0.440316	8.88335e-05	30016	Microtubule-associated protein RP/EB family member 1 OS=Mus musculus OX=10090 GN=Mapre1 PE=1 SV=3
1369	TRUE	Q921F2|TADBP_MOUSE	43.56	17.87	7	7		6303.75	5884.66	6630.66	6273.03	3091.16	2940.36	2926.31	2985.94	0.475997	0.000121669	44548	TAR DNA-binding protein 43 OS=Mus musculus OX=10090 GN=Tardbp PE=1 SV=1
1535	TRUE	Q8VBT0|TMX1_MOUSE	33.08	11.15	3	3		1083.56	1052.23	1044.32	1060.04	2181.78	1824.08	2230.96	2078.94	1.96119	0.00138068	31396	Thioredoxin-related transmembrane protein 1 OS=Mus musculus OX=10090 GN=Tmx1 PE=1 SV=1
3457	TRUE	Q80UY2|KCMF1_MOUSE	32.52	6.56	1	1		322.745	273.315	311.495	302.518	98.062	129.986	101.979	110.009	0.363644	0.00043513	41791	E3 ubiquitin-protein ligase KCMF1 OS=Mus musculus OX=10090 GN=Kcmf1 PE=1 SV=1
2521	TRUE	Q8K0V2|DCNL3_MOUSE	2.01	2.96	1	1		102.892	94.8717	91.7458	96.5032	83.3511	164.896	91.3812	113.209	1.17312	0.557783	34438	DCN1-like protein 3 OS=Mus musculus OX=10090 GN=Dcun1d3 PE=2 SV=1
1506	TRUE	Q9QUJ7|ACSL4_MOUSE	0.69	3.23	3	2		236.26	301.381	221.43	253.024	362.071	148.933	350.837	287.281	1.13539	0.665302	79077	Long-chain-fatty-acid--CoA ligase 4 OS=Mus musculus OX=10090 GN=Acsl4 PE=1 SV=2
1561	TRUE	Q922R8|PDIA6_MOUSE	49.03	21.59	7	7		3842.97	4013.66	4078.58	3978.4	1101.07	1144.28	979.897	1075.08	0.270229	4.54462e-06	48100	Protein disulfide-isomerase A6 OS=Mus musculus OX=10090 GN=Pdia6 PE=1 SV=3
257	FALSE	Q6ZQJ5|DNA2_MOUSE	0.49	0.75	2	2		328.798	248.663	208.957	262.139	238.919	257.308	262.17	252.799	0.964368	0.807827	119447	DNA replication ATP-dependent helicase/nuclease DNA2 OS=Mus musculus OX=10090 GN=Dna2 PE=1 SV=2
752	TRUE	Q3B7Z2|OSBP1_MOUSE	11.94	9.69	5	5		776.089	1324.95	1075.75	1058.93	557.821	784.594	437.058	593.158	0.560149	0.0689281	88797	Oxysterol-binding protein 1 OS=Mus musculus OX=10090 GN=Osbp PE=1 SV=3
2611	TRUE	Q9CQ62|DECR_MOUSE	29.51	13.43	3	3		1721.56	1588.52	1543.23	1617.77	484.743	661.613	694.454	613.603	0.37929	0.000284415	36214	2,4-dienoyl-CoA reductase [(3E)-enoyl-CoA-producing], mitochondrial OS=Mus musculus OX=10090 GN=Decr1 PE=1 SV=1
1944	TRUE	Q99N28|CADM3_MOUSE	20.08	13.38	4	4		660.156	752.089	615.003	675.749	311.68	454.037	386.326	384.014	0.568279	0.00715315	42964	Cell adhesion molecule 3 OS=Mus musculus OX=10090 GN=Cadm3 PE=1 SV=1
1541	TRUE	Q61315|APC_MOUSE	2.17	0.42	1	1		204.633	149.204	289.374	214.403	262.74	185.22	104.692	184.217	0.859209	0.647594	311089	Adenomatous polyposis coli protein OS=Mus musculus OX=10090 GN=Apc PE=1 SV=1
248	FALSE	P70169|DOC2B_MOUSE	8.28	2.18	1	1		727.412	874.137	430.493	677.347	363.287	505.275	428.705	432.422	0.638406	0.147864	45853	Double C2-like domain-containing protein beta OS=Mus musculus OX=10090 GN=Doc2b PE=1 SV=2
43	TRUE	G5E829|AT2B1_MOUSE	14.04	16.07	31	15	Acetylation (Protein N-term); Oxidation (M)	25979.1	24834.8	25748.3	25520.7	22023.9	24051.2	23752	23275.7	0.912032	0.0358892	134747	Plasma membrane calcium-transporting ATPase 1 OS=Mus musculus OX=10090 GN=Atp2b1 PE=1 SV=1
4132	TRUE	Q9CQT1|MTNA_MOUSE	0.32	3.25	1	1		83.9767	50.566	76.2054	70.2494	75.7356	66.859	60.9363	67.8436	0.965755	0.837182	39411	Methylthioribose-1-phosphate isomerase OS=Mus musculus OX=10090 GN=Mri1 PE=1 SV=1
1093	TRUE	P05480|SRC_MOUSE	22.76	10.28	7	5		1540.39	1351.63	1499.76	1463.93	915.54	862.745	659.92	812.735	0.555175	0.00253852	59891	Proto-oncogene tyrosine-protein kinase Src OS=Mus musculus OX=10090 GN=Src PE=1 SV=5
686	TRUE	Q80XN0|BDH_MOUSE	55.39	24.2	8	8	Oxidation (M)	12471.2	13544.2	13004.1	13006.5	4828.06	4764.52	4938.91	4843.83	0.372416	1.29939e-05	38299	D-beta-hydroxybutyrate dehydrogenase, mitochondrial OS=Mus musculus OX=10090 GN=Bdh1 PE=1 SV=2
3582	TRUE	P48024|EIF1_MOUSE	2.49	12.39	1	1		93.444	139.003	457.483	229.977	76.1302	243.923	105.195	141.749	0.616364	0.521347	12747	Eukaryotic translation initiation factor 1 OS=Mus musculus OX=10090 GN=Eif1 PE=1 SV=2
2262	TRUE	Q9CXZ1|NDUS4_MOUSE	22.04	25.71	4	4		1415.71	1112.65	1339.62	1289.33	634.632	461.345	706.113	600.697	0.465899	0.00409757	19785	NADH dehydrogenase [ubiquinone] iron-sulfur protein 4, mitochondrial OS=Mus musculus OX=10090 GN=Ndufs4 PE=1 SV=3
3556	TRUE	P06797|CATL1_MOUSE	15.1	4.79	1	1		236.041	254.361	212.083	234.162	199.588	172.412	189.985	187.329	0.799997	0.0326545	37547	Procathepsin L OS=Mus musculus OX=10090 GN=Ctsl PE=1 SV=2
2760	TRUE	Q569Z6|TR150_MOUSE	5.45	1.37	1	1		53.6671	110.906	62.5673	75.7136	105.985	74.2802	131.711	103.992	1.37349	0.309786	108178	Thyroid hormone receptor-associated protein 3 OS=Mus musculus OX=10090 GN=Thrap3 PE=1 SV=1
1755	TRUE	Q9QZ88|VPS29_MOUSE	37.34	25.82	5	5		4008.43	4496.1	3744.73	4083.09	1840.57	1704.86	1622.75	1722.73	0.421918	0.000500422	20496	Vacuolar protein sorting-associated protein 29 OS=Mus musculus OX=10090 GN=Vps29 PE=1 SV=1
690	TRUE	Q68FH0|PKP4_MOUSE	5.67	4.12	8	5		760.798	963.619	630.122	784.847	680.323	667.53	630.55	659.468	0.840251	0.270606	131551	Plakophilin-4 OS=Mus musculus OX=10090 GN=Pkp4 PE=1 SV=1
1689	TRUE	Q9CQR6|PPP6_MOUSE	15.91	10.16	3	3		1099.51	1697.11	1583.7	1460.11	666.944	966.478	620.801	751.408	0.514625	0.0291324	35159	Serine/threonine-protein phosphatase 6 catalytic subunit OS=Mus musculus OX=10090 GN=Ppp6c PE=1 SV=1
1290	TRUE	Q8VCW8|ACSF2_MOUSE	20.74	8.46	4	4		970.498	1130.46	1098.84	1066.6	584.069	459.806	695.059	579.645	0.543451	0.00434958	67951	Medium-chain acyl-CoA ligase ACSF2, mitochondrial OS=Mus musculus OX=10090 GN=Acsf2 PE=1 SV=1
3100	TRUE	Q3UJP5|CF418_MOUSE	13.05	7.18	1	1		257.92	208.695	236.711	234.442	97.413	26.1258	107.374	76.971	0.328316	0.0057816	23848	Cilia- and flagella-associated protein 418 OS=Mus musculus OX=10090 GN=Cfap418 PE=1 SV=1
458	TRUE	P18872|GNAO_MOUSE	16.41	32.77	12	11	Oxidation (M)	112212	108168	110173	110184	106275	102282	101369	103309	0.937598	0.0226113	40085	Guanine nucleotide-binding protein G(o) subunit alpha OS=Mus musculus OX=10090 GN=Gnao1 PE=1 SV=3
2404	TRUE	Q9JI46|NUDT3_MOUSE	0.52	14.29	2	2		995.659	636.332	1835.27	1155.76	1346.14	848.939	1185.91	1126.99	0.975116	0.943933	19030	Diphosphoinositol polyphosphate phosphohydrolase 1 OS=Mus musculus OX=10090 GN=Nudt3 PE=1 SV=1
728	TRUE	O88544|CSN4_MOUSE	24.79	30.05	11	11		2513.13	2564.93	2296.34	2458.13	1148.19	1088.68	726.147	987.672	0.401798	0.000696491	46285	COP9 signalosome complex subunit 4 OS=Mus musculus OX=10090 GN=Cops4 PE=1 SV=1
1054	TRUE	Q99NB9|SF3B1_MOUSE	19.45	1.76	2	2		380.612	409.373	425.359	405.114	276.214	329.935	262.652	289.6	0.714861	0.00902496	145816	Splicing factor 3B subunit 1 OS=Mus musculus OX=10090 GN=Sf3b1 PE=1 SV=1
624	TRUE	Q9CQA3|SDHB_MOUSE	68.45	36.52	11	11	Oxidation (M)	39235	38523.8	38219.5	38659.4	16776.5	17130.8	17092.9	17000.1	0.439739	2.89632e-07	31814	Succinate dehydrogenase [ubiquinone] iron-sulfur subunit, mitochondrial OS=Mus musculus OX=10090 GN=Sdhb PE=1 SV=1
1011	TRUE	Q5SRX1|TM1L2_MOUSE	19.99	11.05	7	7		3951.46	4342.3	3604.68	3966.15	1597.91	1929.25	2574.82	2033.99	0.512839	0.00566362	55663	TOM1-like protein 2 OS=Mus musculus OX=10090 GN=Tom1l2 PE=1 SV=1
1620	TRUE	Q9ER00|STX12_MOUSE	22.4	21.9	5	5		1414.07	1186.9	1091.68	1230.88	1820.33	2102.63	2174.08	2032.35	1.65113	0.00513642	31195	Syntaxin-12 OS=Mus musculus OX=10090 GN=Stx12 PE=1 SV=1
506	TRUE	Q9CVB6|ARPC2_MOUSE	37.2	36.67	13	13	Oxidation (M)	14672.7	16202.2	16102.7	15659.2	6451	5687.82	5074.17	5737.67	0.366409	9.77308e-05	34357	Actin-related protein 2/3 complex subunit 2 OS=Mus musculus OX=10090 GN=Arpc2 PE=1 SV=3
2410	TRUE	P97823|LYPA1_MOUSE	26.32	13.91	3	3		4083.4	3750.75	3643.85	3826	1042.37	1448.77	1706.46	1399.2	0.365709	0.000490183	24688	Acyl-protein thioesterase 1 OS=Mus musculus OX=10090 GN=Lypla1 PE=1 SV=1
1737	TRUE	Q9D906|ATG7_MOUSE	5.19	8.17	6	6		924.65	740.132	1028.27	897.684	551.756	670.53	967.109	729.798	0.812979	0.324336	77520	Ubiquitin-like modifier-activating enzyme ATG7 OS=Mus musculus OX=10090 GN=Atg7 PE=1 SV=1
1094	TRUE	P60487|PLPP_MOUSE	26.79	39.04	10	10		8137.32	10456.4	10755.8	9783.18	5145.85	4647.72	5119.2	4970.92	0.508109	0.00465892	31512	Chronophin OS=Mus musculus OX=10090 GN=Pdxp PE=1 SV=1
2566	TRUE	Q8BWS5|GRIN3_MOUSE	16.76	4.19	2	2		132.578	101.208	113.158	115.648	185.094	163.847	149.998	166.313	1.4381	0.0208754	80485	G protein-regulated inducer of neurite outgrowth 3 OS=Mus musculus OX=10090 GN=Gprin3 PE=1 SV=1
1337	TRUE	Q8VDZ4|ZDHC5_MOUSE	17.31	8.81	5	5		633.437	805.241	600.065	679.581	1052.58	988.125	916.644	985.783	1.45057	0.0148712	77501	Palmitoyltransferase ZDHHC5 OS=Mus musculus OX=10090 GN=Zdhhc5 PE=1 SV=1
2302	TRUE	G3X9J0|SI1L3_MOUSE	0.21	0.62	2	1		55.975	56.5839	64.833	59.1306	46.2848	63.9054	67.7909	59.327	1.00332	0.979563	195063	Signal-induced proliferation-associated 1-like protein 3 OS=Mus musculus OX=10090 GN=Sipa1l3 PE=1 SV=1
1092	TRUE	Q920P5|KAD5_MOUSE	25.26	12.28	6	6		1852.44	1721.25	1527.55	1700.41	848.517	781	1037.1	888.872	0.522739	0.00261682	63323	Adenylate kinase isoenzyme 5 OS=Mus musculus OX=10090 GN=Ak5 PE=1 SV=2
3816	TRUE	Q80V94|AP4E1_MOUSE	8.2	1.07	1	1	N-ethylmaleimide on cysteines	224.86	265.647	180.533	223.68	59.7071	83.5019	230.753	124.654	0.557287	0.167828	124845	AP-4 complex subunit epsilon-1 OS=Mus musculus OX=10090 GN=Ap4e1 PE=1 SV=3
1380	TRUE	Q91YR1|TWF1_MOUSE	16.52	12	5	3	Acetylation (Protein N-term)	1193.22	1374.46	1122.01	1229.9	392.816	586.1	793.857	590.925	0.480467	0.00981614	40079	Twinfilin-1 OS=Mus musculus OX=10090 GN=Twf1 PE=1 SV=2
1556	TRUE	Q14CH0|F171B_MOUSE	1.36	5.09	4	4		1307.41	1453.87	1413.53	1391.61	1337.54	576.788	2246.71	1387.01	0.996701	0.992897	92045	Protein FAM171B OS=Mus musculus OX=10090 GN=Fam171b PE=1 SV=2
1157	TRUE	P19536|COX5B_MOUSE	58.43	31.25	5	5	Oxidation (M)	79509.3	75017.8	80111.8	78213	22840.7	21730.2	23025.7	22532.2	0.288088	4.67969e-06	13813	Cytochrome c oxidase subunit 5B, mitochondrial OS=Mus musculus OX=10090 GN=Cox5b PE=1 SV=1
1077	TRUE	P61027|RAB10_MOUSE	34.21	32.5	8	7		5719.17	5453.2	5720.91	5631.09	2769.06	2426.53	2141.92	2445.84	0.434345	9.43896e-05	22541	Ras-related protein Rab-10 OS=Mus musculus OX=10090 GN=Rab10 PE=1 SV=1
2695	TRUE	P47791|GSHR_MOUSE	9.06	4.6	2	2		644.423	482.752	654.322	593.832	458.342	393.623	168.8	340.255	0.572982	0.0711275	53663	Glutathione reductase, mitochondrial OS=Mus musculus OX=10090 GN=Gsr PE=1 SV=3
3210	TRUE	Q9WUB4|DCTN6_MOUSE	12.65	13.68	2	2		300.345	353.965	356.197	336.836	301.885	263.381	271.646	278.97	0.828209	0.0558999	20670	Dynactin subunit 6 OS=Mus musculus OX=10090 GN=Dctn6 PE=1 SV=1
1615	TRUE	Q8BHF7|PGPS1_MOUSE	21.15	6.51	3	3		740.747	823.037	752.362	772.049	503.964	609.244	494.856	536.021	0.694284	0.00622661	62489	CDP-diacylglycerol--glycerol-3-phosphate 3-phosphatidyltransferase, mitochondrial OS=Mus musculus OX=10090 GN=Pgs1 PE=1 SV=1
254	FALSE	Q9Z1T1|AP3B1_MOUSE	3.26	0.72	1	1		373.035	370.409	188.844	310.763	264.963	288.096	181.201	244.753	0.787589	0.393361	122740	AP-3 complex subunit beta-1 OS=Mus musculus OX=10090 GN=Ap3b1 PE=1 SV=2
2000	TRUE	Q9D8U8|SNX5_MOUSE	18.73	6.68	3	3		414.708	426.427	508.048	449.728	228.374	248.163	325.821	267.453	0.594699	0.0120427	46797	Sorting nexin-5 OS=Mus musculus OX=10090 GN=Snx5 PE=1 SV=1
1870	TRUE	Q9D710|TMX2_MOUSE	4.39	14.58	4	4		1499.64	1146.27	1122.47	1256.13	1347.14	1002.64	887.838	1079.21	0.859156	0.391132	33943	Thioredoxin-related transmembrane protein 2 OS=Mus musculus OX=10090 GN=Tmx2 PE=1 SV=1
2129	TRUE	Q8BFY6|PEF1_MOUSE	30.41	15.64	4	4		1147.85	1437.68	1483.14	1356.22	556.906	586.706	470.784	538.132	0.396788	0.00178246	29228	Peflin OS=Mus musculus OX=10090 GN=Pef1 PE=1 SV=1
164	TRUE	P14824|ANXA6_MOUSE	34.73	35.66	25	25		13116.4	12406.9	12391.3	12638.2	5171.91	6085.13	4729.08	5328.7	0.421635	9.59864e-05	75885	Annexin A6 OS=Mus musculus OX=10090 GN=Anxa6 PE=1 SV=3
2890	TRUE	P38585|TTL_MOUSE	2.55	5.57	2	2		193.076	70.8695	119.144	127.697	1775.54	85.1485	82.8773	647.857	5.07341	0.40931	43136	Tubulin--tyrosine ligase OS=Mus musculus OX=10090 GN=Ttl PE=1 SV=2
743	TRUE	Q8VCT3|AMPB_MOUSE	20.48	20.15	11	11		1569.4	1659.49	1113.49	1447.46	673.52	826.511	641.687	713.906	0.493213	0.0147008	72416	Aminopeptidase B OS=Mus musculus OX=10090 GN=Rnpep PE=1 SV=2
1432	TRUE	Q3TMH2|SCRN3_MOUSE	1.17	5.5	2	2		121.92	289.257	313.428	241.535	264.041	167.4	359.435	263.625	1.09146	0.800589	47661	Secernin-3 OS=Mus musculus OX=10090 GN=Scrn3 PE=1 SV=1
167	TRUE	Q8CIQ7|DOCK3_MOUSE	6.07	9.03	18	18		1932.95	1672.42	1561.94	1722.44	1872.3	1220.97	972.66	1355.31	0.786856	0.274124	232910	Dedicator of cytokinesis protein 3 OS=Mus musculus OX=10090 GN=Dock3 PE=1 SV=1
154	TRUE	Q8CJ19|MICA3_MOUSE	1.19	9.68	19	19	acrylamide	846.879	916.524	1106.95	956.785	939.365	1077.09	744.84	920.432	0.962005	0.783666	223721	[F-actin]-monooxygenase MICAL3 OS=Mus musculus OX=10090 GN=Mical3 PE=1 SV=2
1012	TRUE	P22892|AP1G1_MOUSE	24.48	9.12	9	9		2142.26	2121.89	2134.42	2132.86	1754.1	1506.02	1629.43	1629.85	0.764165	0.00219242	91350	AP-1 complex subunit gamma-1 OS=Mus musculus OX=10090 GN=Ap1g1 PE=1 SV=3
2874	TRUE	Q9CQR2|RS21_MOUSE	29.99	28.92	2	2		1668.38	1562.08	1724.94	1651.8	981.515	893.871	1074.16	983.183	0.595219	0.000694575	9141	40S ribosomal protein S21 OS=Mus musculus OX=10090 GN=Rps21 PE=1 SV=1
779	TRUE	P84075|HPCA_MOUSE	34.23	19.17	11	3	Oxidation (M)	2515.53	2742.25	2505.11	2587.63	267.174	399.376	479.366	381.972	0.147615	2.40896e-05	22427	Neuron-specific calcium-binding protein hippocalcin OS=Mus musculus OX=10090 GN=Hpca PE=1 SV=2
966	TRUE	Q9WTU6|MK09_MOUSE	9.14	5.2	8	2		346.108	341.466	465.592	384.389	275.245	310.505	329.301	305.017	0.793511	0.142831	48189	Mitogen-activated protein kinase 9 OS=Mus musculus OX=10090 GN=Mapk9 PE=1 SV=2
1002	TRUE	Q9WVK8|CP46A_MOUSE	47.24	23.6	11	11		2188.28	2067.69	2009.62	2088.53	1053.72	1018.89	1071.75	1048.12	0.501845	4.55151e-05	56814	Cholesterol 24-hydroxylase OS=Mus musculus OX=10090 GN=Cyp46a1 PE=1 SV=1
2001	TRUE	Q9WU40|MAN1_MOUSE	18.89	3.15	2	2		224.389	267.149	206.378	232.639	169.381	166.137	164.948	166.822	0.717088	0.02192	100307	Inner nuclear membrane protein Man1 OS=Mus musculus OX=10090 GN=Lemd3 PE=1 SV=2
963	TRUE	Q61490|CD166_MOUSE	44.53	16.3	9	9		3550.3	3870.52	3591.8	3670.88	1860.75	1955.06	1838.93	1884.91	0.513478	7.45648e-05	65092	CD166 antigen OS=Mus musculus OX=10090 GN=Alcam PE=1 SV=3
2006	TRUE	Q6PA06|ATLA2_MOUSE	5.03	1.89	2	1		61.6491	112.25	131.767	101.889	71.9843	76.9247	73.9536	74.2875	0.729105	0.257942	66224	Atlastin-2 OS=Mus musculus OX=10090 GN=Atl2 PE=1 SV=1
2235	TRUE	Q6DFW4|NOP58_MOUSE	1.48	1.68	1	1		120.627	182.47	181.209	161.435	199.522	39.5023	248.166	162.397	1.00595	0.98912	60343	Nucleolar protein 58 OS=Mus musculus OX=10090 GN=Nop58 PE=1 SV=1
1382	TRUE	O35864|CSN5_MOUSE	11.38	20.96	6	6		2616.58	1471.29	1559.52	1882.46	1313.82	936.894	1080.71	1110.47	0.589905	0.114734	37549	COP9 signalosome complex subunit 5 OS=Mus musculus OX=10090 GN=Cops5 PE=1 SV=3
1656	TRUE	Q4VAE3|TMM65_MOUSE	23.38	24.79	5	5		3814.84	4931.9	4891.48	4546.07	1111.56	1813.5	1847.84	1590.97	0.349965	0.00250419	24918	Transmembrane protein 65 OS=Mus musculus OX=10090 GN=Tmem65 PE=1 SV=1
260	TRUE	Q9QVP9|FAK2_MOUSE	9.49	15.46	16	15		4586.93	3886.78	4720.59	4398.1	3520.14	3232.42	4149.02	3633.86	0.826234	0.110716	115794	Protein-tyrosine kinase 2-beta OS=Mus musculus OX=10090 GN=Ptk2b PE=1 SV=2
2706	TRUE	P57759|ERP29_MOUSE	0.13	8.4	2	2		347.459	263.374	129.687	246.84	212.044	235.516	245.837	231.133	0.936365	0.818725	28823	Endoplasmic reticulum resident protein 29 OS=Mus musculus OX=10090 GN=Erp29 PE=1 SV=2
787	TRUE	P12658|CALB1_MOUSE	47.74	37.55	12	11		5963.41	5609.92	5990.32	5854.55	2088.27	1822.24	1977.01	1962.51	0.335211	1.13946e-05	29994	Calbindin OS=Mus musculus OX=10090 GN=Calb1 PE=1 SV=2
1079	TRUE	Q7M6Y3|PICAL_MOUSE	27.87	11.82	8	6		1226.17	1588.88	1209.15	1341.4	579.455	565.478	673.437	606.123	0.451858	0.00460254	71543	Phosphatidylinositol-binding clathrin assembly protein OS=Mus musculus OX=10090 GN=Picalm PE=1 SV=1
18	TRUE	Q9QXZ0|MACF1_MOUSE	0.4	7.42	47	46		1342.2	8211.97	8512.75	6022.31	4309.12	5287.15	5104.89	4900.38	0.813706	0.659415	831878	Microtubule-actin cross-linking factor 1, isoforms 1/2/3/4 OS=Mus musculus OX=10090 GN=Macf1 PE=1 SV=2
450	TRUE	Q9CZ13|QCR1_MOUSE	48.72	28.54	14	13	Oxidation (M)	39520.5	39441.8	40860.2	39940.8	21254.1	22734.3	22273.4	22087.3	0.553	9.51494e-06	52852	Cytochrome b-c1 complex subunit 1, mitochondrial OS=Mus musculus OX=10090 GN=Uqcrc1 PE=1 SV=2
151	TRUE	P50396|GDIA_MOUSE	34.74	36.91	19	15	Oxidation (M)	46243.6	44836.8	46642.5	45907.6	23038	26956.3	26585.6	25526.6	0.556043	0.000116756	50522	Rab GDP dissociation inhibitor alpha OS=Mus musculus OX=10090 GN=Gdi1 PE=1 SV=3
2951	TRUE	Q6NVG1|LPCT4_MOUSE	0.46	4.77	2	2		396.185	384.452	307.138	362.592	449.946	326.292	300.161	358.8	0.989543	0.947374	57143	Lysophospholipid acyltransferase LPCAT4 OS=Mus musculus OX=10090 GN=Lpcat4 PE=1 SV=1
2836	TRUE	Q9DAI2|IFT22_MOUSE	2.45	12.97	2	2		597.037	374.472	448.895	473.468	509.454	271.156	465.628	415.413	0.877383	0.586148	20833	Intraflagellar transport protein 22 homolog OS=Mus musculus OX=10090 GN=Ift22 PE=1 SV=1
2091	TRUE	P62069|UBP46_MOUSE	7.88	2.19	3	1		377.727	339.356	203.77	306.951	253.859	191.284	111.569	185.571	0.604562	0.143956	42442	Ubiquitin carboxyl-terminal hydrolase 46 OS=Mus musculus OX=10090 GN=Usp46 PE=1 SV=1
2360	TRUE	Q9CQC9|SAR1B_MOUSE	40.07	15.66	3	3		2513.75	2352.8	2453.16	2439.91	887.615	946.027	762.99	865.544	0.354745	2.52169e-05	22382	GTP-binding protein SAR1b OS=Mus musculus OX=10090 GN=Sar1b PE=1 SV=1
543	TRUE	Q8CJH3|PLXB1_MOUSE	6.2	3.59	7	7		959.451	1538.32	1526.64	1341.47	965.436	1020.01	1156.2	1047.21	0.780647	0.213839	231376	Plexin-B1 OS=Mus musculus OX=10090 GN=Plxnb1 PE=1 SV=2
3144	TRUE	Q3UHX2|HAP28_MOUSE	49.91	7.73	1	1		113.717	65.3016	93.1278	90.7156	18.6569	18.6569	18.6569	18.6569	0.205663	0.00680707	20605	28 kDa heat- and acid-stable phosphoprotein OS=Mus musculus OX=10090 GN=Pdap1 PE=1 SV=1
2286	TRUE	Q8QZT2|CCSAP_MOUSE	14.7	21.43	4	4		1938.86	1213.05	1536.43	1562.78	774.635	956.372	482.522	737.843	0.472136	0.0304033	28379	Centriole, cilia and spindle-associated protein OS=Mus musculus OX=10090 GN=Ccsap PE=1 SV=1
901	TRUE	Q99JI4|PSMD6_MOUSE	25.11	17.22	7	7		1954.22	2154.76	1870.72	1993.23	899.766	1116.26	1208.66	1074.9	0.539274	0.00179675	45536	26S proteasome non-ATPase regulatory subunit 6 OS=Mus musculus OX=10090 GN=Psmd6 PE=1 SV=1
11	TRUE	Q68FD5|CLH1_MOUSE	53.03	39.64	61	61	Acetylation (Protein N-term); Oxidation (M)	118338	117413	116698	117483	95059.3	96327.9	96427.3	95938.2	0.816612	4.86715e-06	191557	Clathrin heavy chain 1 OS=Mus musculus OX=10090 GN=Cltc PE=1 SV=3
1096	TRUE	Q91VM5|RMXL1_MOUSE	20.05	21.65	9	9		1497.62	1529.05	1595.25	1540.64	854.337	992.02	1174.54	1006.97	0.653603	0.00534121	42162	RNA binding motif protein, X-linked-like-1 OS=Mus musculus OX=10090 GN=Rbmxl1 PE=2 SV=1
729	TRUE	P10852|4F2_MOUSE	44.42	21.67	11	11		4753.88	5051.44	4778.15	4861.16	2889.11	2805.08	2975.78	2889.99	0.594506	5.17995e-05	58337	4F2 cell-surface antigen heavy chain OS=Mus musculus OX=10090 GN=Slc3a2 PE=1 SV=1
116	TRUE	Q9D0E1|HNRPM_MOUSE	41.1	46.09	32	32	Acetylation (Protein N-term); Oxidation (M)	6490.04	6598.7	6089.36	6392.7	1915.35	1592.92	2013.81	1840.7	0.287937	2.2232e-05	77649	Heterogeneous nuclear ribonucleoprotein M OS=Mus musculus OX=10090 GN=Hnrnpm PE=1 SV=3
2778	TRUE	Q8BLU0|FLRT2_MOUSE	4	1.67	1	1		18.6569	84.4183	75.7617	59.6123	66.5881	54.5211	85.1072	68.7388	1.1531	0.705357	73948	Leucine-rich repeat transmembrane protein FLRT2 OS=Mus musculus OX=10090 GN=Flrt2 PE=1 SV=1
2318	TRUE	Q9D9V3|ECHD1_MOUSE	6.14	9.01	3	3		1250.65	1034.61	685.057	990.108	550.371	488.638	1013.78	684.262	0.691099	0.260759	35467	Ethylmalonyl-CoA decarboxylase OS=Mus musculus OX=10090 GN=Echdc1 PE=1 SV=2
3387	TRUE	Q922G0|S2536_MOUSE	0.34	4.18	1	1		142.417	222.175	250.855	205.149	209.716	200.716	198.627	203.019	0.989619	0.951075	34170	Solute carrier family 25 member 36 OS=Mus musculus OX=10090 GN=Slc25a36 PE=2 SV=1
1955	TRUE	Q922Q4|P5CR2_MOUSE	23.29	18.44	4	4		1040.38	1020.32	961.798	1007.5	493.939	535.815	339.866	456.54	0.453142	0.00100492	33659	Pyrroline-5-carboxylate reductase 2 OS=Mus musculus OX=10090 GN=Pycr2 PE=1 SV=1
4138	TRUE	Q9WU28|PFD5_MOUSE	10.82	9.74	1	1		116.101	125.537	73.6868	105.108	18.6569	18.6569	65.8066	34.3734	0.327029	0.034204	17356	Prefoldin subunit 5 OS=Mus musculus OX=10090 GN=Pfdn5 PE=1 SV=1
1607	TRUE	Q9D1Q6|ERP44_MOUSE	26.58	10.84	4	4		1425.1	1515.4	1138.77	1359.76	371.411	572.391	473.324	472.375	0.347396	0.00223947	46853	Endoplasmic reticulum resident protein 44 OS=Mus musculus OX=10090 GN=Erp44 PE=1 SV=1
1497	TRUE	Q9D1G5|LRC57_MOUSE	17.66	28.03	7	7		2167.84	3408.41	1762.9	2446.38	955.298	1208.89	895.184	1019.79	0.416857	0.0473898	26760	Leucine-rich repeat-containing protein 57 OS=Mus musculus OX=10090 GN=Lrrc57 PE=1 SV=1
2323	TRUE	P54830|PTN5_MOUSE	4.83	2.4	1	1		94.1887	96.7142	125.987	105.63	90.9746	108.01	65.5227	88.169	0.834696	0.336906	60815	Tyrosine-protein phosphatase non-receptor type 5 OS=Mus musculus OX=10090 GN=Ptpn5 PE=1 SV=2
1144	TRUE	A2ALS5|RPGP1_MOUSE	32.52	10.56	7	6		2488.52	2238.94	2479.48	2402.31	978.806	1230.26	1154.95	1121.34	0.466776	0.000317434	73433	Rap1 GTPase-activating protein 1 OS=Mus musculus OX=10090 GN=Rap1gap PE=1 SV=2
645	FALSE	Q8BHJ7|GBRA5_MOUSE	24.92	3.89	2	2		834.63	982.312	793.737	870.226	245.077	254.792	402.594	300.821	0.345682	0.0017543	52274	Gamma-aminobutyric acid receptor subunit alpha-5 OS=Mus musculus OX=10090 GN=Gabra5 PE=1 SV=1
2026	TRUE	Q9D023|MPC2_MOUSE	36.92	32.28	5	5		4678.56	4784.6	5093.69	4852.28	2974.36	3196.5	2950	3040.29	0.626569	0.00024995	14286	Mitochondrial pyruvate carrier 2 OS=Mus musculus OX=10090 GN=Mpc2 PE=1 SV=1
2167	TRUE	Q8BGB7|ENOPH_MOUSE	25	9.73	2	2		570.495	703.684	638.292	637.49	196.339	238.5	315.036	249.958	0.392097	0.00170941	28600	Enolase-phosphatase E1 OS=Mus musculus OX=10090 GN=Enoph1 PE=1 SV=1
1281	TRUE	P35585|AP1M1_MOUSE	30.66	18.91	7	7	Acetylation (Protein N-term)	1731.04	1519.13	1680.01	1643.39	616.105	654.216	822.178	697.499	0.424427	0.000461724	48543	AP-1 complex subunit mu-1 OS=Mus musculus OX=10090 GN=Ap1m1 PE=1 SV=3
2495	TRUE	Q6NV83|SR140_MOUSE	1.51	1.36	1	1		288.188	369.94	268.596	308.908	312.906	420.289	266.224	333.14	1.07844	0.683181	118261	U2 snRNP-associated SURP motif-containing protein OS=Mus musculus OX=10090 GN=U2surp PE=1 SV=3
1533	TRUE	Q9QZS3|NUMB_MOUSE	14.29	3.22	4	2		338.272	434.192	396.986	389.817	206.362	183.997	309.555	233.305	0.598498	0.0304564	70813	Protein numb homolog OS=Mus musculus OX=10090 GN=Numb PE=1 SV=1
255	TRUE	P35486|ODPA_MOUSE	66.24	41.03	20	20	Oxidation (M)	44010.2	44710.7	43998.1	44239.7	23202.3	23330.5	23763.7	23432.2	0.529665	2.27336e-07	43232	Pyruvate dehydrogenase E1 component subunit alpha, somatic form, mitochondrial OS=Mus musculus OX=10090 GN=Pdha1 PE=1 SV=1
1651	TRUE	Q9D289|TPC6B_MOUSE	1.05	24.05	4	4		985.074	841.854	802.512	876.48	934.775	822.392	809.301	855.489	0.976051	0.773882	17936	Trafficking protein particle complex subunit 6B OS=Mus musculus OX=10090 GN=Trappc6b PE=1 SV=1
1270	TRUE	P28650|PURA1_MOUSE	32.27	5.47	3	2		333.915	485.554	515.604	445.024	110.34	107.345	117.374	111.686	0.250967	0.00407791	50254	Adenylosuccinate synthetase isozyme 1 OS=Mus musculus OX=10090 GN=Adss1 PE=1 SV=2
2042	TRUE	P49442|INPP_MOUSE	14.64	7.07	2	2		334.279	344.062	406.661	361.667	446.909	425.639	447.647	440.065	1.21677	0.0300783	43346	Inositol polyphosphate 1-phosphatase OS=Mus musculus OX=10090 GN=Inpp1 PE=1 SV=2
195	TRUE	Q61598|GDIB_MOUSE	58.96	31.69	18	14	Oxidation (M)	17168.2	17001.3	16783	16984.2	9352.33	9240.76	8998.06	9197.05	0.541507	8.89335e-07	50537	Rab GDP dissociation inhibitor beta OS=Mus musculus OX=10090 GN=Gdi2 PE=1 SV=1
2411	TRUE	Q9CPS6|HINT3_MOUSE	30.35	19.39	3	3		3639.53	3421.3	3055.1	3371.98	1153.86	1078.33	1505.96	1246.05	0.369531	0.000592198	18788	Adenosine 5'-monophosphoramidase HINT3 OS=Mus musculus OX=10090 GN=Hint3 PE=1 SV=1
1972	TRUE	Q91V76|CK054_MOUSE	21.28	2.86	1	1		460.147	593.437	575.775	543.12	174.509	291.46	169.964	211.978	0.390297	0.00456426	34996	Ester hydrolase C11orf54 homolog OS=Mus musculus OX=10090 PE=1 SV=1
228	TRUE	P63038|CH60_MOUSE	66.74	40.14	22	22		28458.8	28493.5	28057.3	28336.5	11411.4	11506.2	11076.7	11331.4	0.399887	9.58167e-08	60955	60 kDa heat shock protein, mitochondrial OS=Mus musculus OX=10090 GN=Hspd1 PE=1 SV=1
353	TRUE	Q9QYS2|GRM3_MOUSE	25.93	17.75	17	15	Oxidation (M)	8525.92	8741.04	8662.52	8643.16	6130.3	6493.26	5408.37	6010.64	0.695422	0.00126243	99114	Metabotropic glutamate receptor 3 OS=Mus musculus OX=10090 GN=Grm3 PE=1 SV=1
98	TRUE	Q91V92|ACLY_MOUSE	32.1	29.33	31	31	Oxidation (M)	5556.63	5191.45	5562.04	5436.71	3645.84	3294.88	3714.64	3551.79	0.653297	0.000457034	119728	ATP-citrate synthase OS=Mus musculus OX=10090 GN=Acly PE=1 SV=1
1784	TRUE	P54923|ADPRH_MOUSE	22.69	10.22	3	3		994.975	858.818	1074.83	976.207	598.619	462.719	417.094	492.811	0.504822	0.00439746	40068	ADP-ribosylhydrolase ARH1 OS=Mus musculus OX=10090 GN=Adprh PE=1 SV=1
307	TRUE	Q9CZW5|TOM70_MOUSE	19.25	27.82	16	16	Oxidation (M)	11316.5	12242.2	12226.1	11928.3	7255.61	6832.15	9326.91	7804.89	0.654319	0.00763856	67590	Mitochondrial import receptor subunit TOM70 OS=Mus musculus OX=10090 GN=Tomm70 PE=1 SV=2
1973	TRUE	P08775|RPB1_MOUSE	1.71	1.93	4	4		413.862	421.976	971.52	602.452	321.678	1089.99	922.069	777.914	1.29125	0.586916	217176	DNA-directed RNA polymerase II subunit RPB1 OS=Mus musculus OX=10090 GN=Polr2a PE=1 SV=3
2206	TRUE	Q8CFE4|SCYL2_MOUSE	0.87	1.72	1	1		101.33	141.598	85.2056	109.378	310.322	18.6569	52.1125	127.03	1.16139	0.859689	103317	SCY1-like protein 2 OS=Mus musculus OX=10090 GN=Scyl2 PE=1 SV=1
2649	TRUE	Q9EPK2|XRP2_MOUSE	16.12	2.31	1	1		289.419	301.594	340.259	310.424	474.079	386.414	388.905	416.466	1.3416	0.0314036	39377	Protein XRP2 OS=Mus musculus OX=10090 GN=Rp2 PE=1 SV=3
831	TRUE	Q99MK8|ARBK1_MOUSE	1.1	10.16	9	7		1549.57	1181.39	2161.66	1630.87	4204.08	654.853	823.547	1894.16	1.16144	0.835842	79639	Beta-adrenergic receptor kinase 1 OS=Mus musculus OX=10090 GN=Grk2 PE=1 SV=2
997	TRUE	Q9CZC8|SCRN1_MOUSE	32.06	24.4	9	9	Acetylation (Protein N-term)	6262.71	5761.16	5199.81	5741.23	2723.13	2147.02	2230.9	2367.02	0.412284	0.000689237	46326	Secernin-1 OS=Mus musculus OX=10090 GN=Scrn1 PE=1 SV=1
1234	TRUE	Q6ZWX6|IF2A_MOUSE	22.92	15.24	5	5		1455.06	1474.3	1378.68	1436.01	905.372	635.944	606.88	716.066	0.498648	0.00192922	36108	Eukaryotic translation initiation factor 2 subunit 1 OS=Mus musculus OX=10090 GN=Eif2s1 PE=1 SV=3
2107	TRUE	Q6PGE7|SC6A7_MOUSE	69.79	1.57	1	1		103.744	119.657	100.416	107.939	18.6569	18.6569	18.6569	18.6569	0.172846	0.000113946	71066	Sodium-dependent proline transporter OS=Mus musculus OX=10090 GN=Slc6a7 PE=1 SV=1
1745	TRUE	O89112|LANC1_MOUSE	14.28	15.04	6	6		7008.51	6055.74	5278.47	6114.24	3809.59	4843.8	3217.59	3956.99	0.647177	0.0353049	45341	Glutathione S-transferase LANCL1 OS=Mus musculus OX=10090 GN=Lancl1 PE=1 SV=1
365	TRUE	P62814|VATB2_MOUSE	80.17	40.51	18	18	Oxidation (M)	45270.9	45291.2	45391.8	45318	22551.1	22888.6	22724.9	22721.5	0.50138	2.72987e-09	56551	V-type proton ATPase subunit B, brain isoform OS=Mus musculus OX=10090 GN=Atp6v1b2 PE=1 SV=1
817	TRUE	Q99KY4|GAK_MOUSE	14.19	4.29	7	5		595.866	608.091	1023.15	742.369	405.887	440.969	402.088	416.315	0.560793	0.0817815	143641	Cyclin-G-associated kinase OS=Mus musculus OX=10090 GN=Gak PE=1 SV=2
64	TRUE	Q6P9K8|CSKI1_MOUSE	23.79	35.22	38	38		6520.31	6994.72	6147.24	6554.09	8253.15	8578.75	8122.05	8317.99	1.26913	0.00325817	150495	Caskin-1 OS=Mus musculus OX=10090 GN=Caskin1 PE=1 SV=2
1560	TRUE	Q61543|GSLG1_MOUSE	0.74	2.55	3	3		302.061	253.986	305.981	287.343	223.287	366.747	259.273	283.102	0.985244	0.93132	133734	Golgi apparatus protein 1 OS=Mus musculus OX=10090 GN=Glg1 PE=1 SV=1
851	TRUE	P31324|KAP3_MOUSE	27.51	24.52	10	8		8263.61	7920.39	7088.62	7757.54	3699.91	2869.6	3959.16	3509.56	0.452406	0.000894623	46167	cAMP-dependent protein kinase type II-beta regulatory subunit OS=Mus musculus OX=10090 GN=Prkar2b PE=1 SV=3
765	FALSE	Q8BIV3|RNBP6_MOUSE	17.09	1.09	1	1		593.61	341.874	610.217	515.234	229.216	190.728	112.343	177.429	0.344366	0.0224025	124587	Ran-binding protein 6 OS=Mus musculus OX=10090 GN=Ranbp6 PE=1 SV=3
1856	TRUE	Q9CYZ2|TPD54_MOUSE	28.5	24.09	5	5		880.064	843.174	1041.48	921.572	477.119	411.677	500.889	463.228	0.502651	0.00232	24043	Tumor protein D54 OS=Mus musculus OX=10090 GN=Tpd52l2 PE=1 SV=1
881	TRUE	Q7TMF3|NDUAC_MOUSE	39.77	53.79	9	9	Acetylation (Protein N-term)	7614.89	7929.34	7324.27	7622.84	2568.15	2891.62	3154.38	2871.39	0.376682	4.06347e-05	17086	NADH dehydrogenase [ubiquinone] 1 alpha subcomplex subunit 12 OS=Mus musculus OX=10090 GN=Ndufa12 PE=1 SV=2
1705	TRUE	P53702|CCHL_MOUSE	45.14	18.01	5	5		1845.95	1893.04	1992.84	1910.61	638.825	726.44	630.818	665.361	0.348245	1.95102e-05	30978	Holocytochrome c-type synthase OS=Mus musculus OX=10090 GN=Hccs PE=1 SV=2
617	TRUE	Q8VD37|SGIP1_MOUSE	33.17	14.27	9	9		3542.34	3546.41	3909.32	3666.02	2616.75	2534.78	2535.59	2562.38	0.698953	0.000898745	86063	SH3-containing GRB2-like protein 3-interacting protein 1 OS=Mus musculus OX=10090 GN=Sgip1 PE=1 SV=1
1207	TRUE	Q8K354|CBR3_MOUSE	0.2	30.32	9	8		9217.48	1174.61	9020.1	6470.73	4539.21	4263.6	4472.71	4425.17	0.683876	0.483238	30953	Carbonyl reductase [NADPH] 3 OS=Mus musculus OX=10090 GN=Cbr3 PE=1 SV=1
631	TRUE	O70305|ATX2_MOUSE	1.73	10.82	11	11		1323.35	1650.01	1313.09	1428.82	1194.6	1329.64	1557.6	1360.61	0.952265	0.679149	136485	Ataxin-2 OS=Mus musculus OX=10090 GN=Atxn2 PE=1 SV=1
2798	TRUE	Q8K2I1|FNTB_MOUSE	23.05	2.06	1	1		136.323	116.039	144.916	132.426	50.03	71.2637	69.6003	63.6313	0.480505	0.00327102	48820	Protein farnesyltransferase subunit beta OS=Mus musculus OX=10090 GN=Fntb PE=1 SV=1
2617	TRUE	P70297|STAM1_MOUSE	15.62	5.84	3	3		931.269	832.179	771.695	845.048	604.073	485.589	340.446	476.703	0.564113	0.0145562	59771	Signal transducing adapter molecule 1 OS=Mus musculus OX=10090 GN=Stam PE=1 SV=3
1261	TRUE	Q91YP2|NEUL_MOUSE	20.11	8.24	5	5	Oxidation (M)	1038.26	1632.83	2071.89	1580.99	470.823	647.969	506.075	541.623	0.342583	0.0269056	80429	Neurolysin, mitochondrial OS=Mus musculus OX=10090 GN=Nln PE=1 SV=1
1450	TRUE	Q8BTX9|HSDL1_MOUSE	20.16	15.45	5	5		1460.69	1311.59	1217.47	1329.92	959.711	1052.67	1009.53	1007.3	0.75742	0.0130535	36868	Inactive hydroxysteroid dehydrogenase-like protein 1 OS=Mus musculus OX=10090 GN=Hsdl1 PE=1 SV=1
838	TRUE	Q08331|CALB2_MOUSE	44.8	26.2	8	7		4598.4	4599.24	4176.8	4458.15	1692.24	1481.65	1543.97	1572.62	0.352752	4.76623e-05	31373	Calretinin OS=Mus musculus OX=10090 GN=Calb2 PE=1 SV=3
912	TRUE	O35099|M3K5_MOUSE	5.42	2.68	3	3		441.044	423.355	381.561	415.32	360.024	323.602	431.753	371.793	0.895196	0.297088	154512	Mitogen-activated protein kinase kinase kinase 5 OS=Mus musculus OX=10090 GN=Map3k5 PE=1 SV=3
1626	TRUE	Q8R4U7|LUZP1_MOUSE	22.99	4.4	4	4	Oxidation (M)	21585	20054.1	20155.3	20598.2	18056.1	17815.6	17314.9	17728.9	0.860701	0.00604626	119311	Leucine zipper protein 1 OS=Mus musculus OX=10090 GN=Luzp1 PE=1 SV=2
1696	TRUE	Q6NVE8|WDR44_MOUSE	11.93	2.62	2	2		224.807	362.194	343.336	310.112	193.249	183.325	226.73	201.102	0.64848	0.0723965	101555	WD repeat-containing protein 44 OS=Mus musculus OX=10090 GN=Wdr44 PE=1 SV=1
1174	TRUE	P09528|FRIH_MOUSE	36.73	34.07	6	6	Acetylation (Protein N-term)	9970.97	9888.62	9865.51	9908.37	5831.45	6238.34	5405.55	5825.11	0.587898	7.29732e-05	21067	Ferritin heavy chain OS=Mus musculus OX=10090 GN=Fth1 PE=1 SV=2
951	TRUE	Q8BNW9|KBTBB_MOUSE	55.06	17.06	9	9		3856.04	3661.89	3706.23	3741.39	1591.34	1625.04	1680.77	1632.39	0.436305	5.14139e-06	67946	Kelch repeat and BTB domain-containing protein 11 OS=Mus musculus OX=10090 GN=Kbtbd11 PE=1 SV=3
3329	TRUE	Q3UYG8|MACD2_MOUSE	16.57	2.32	1	1		257.607	278.436	227.603	254.549	149.527	193.543	188.21	177.093	0.695715	0.0186951	52145	ADP-ribose glycohydrolase MACROD2 OS=Mus musculus OX=10090 GN=Macrod2 PE=1 SV=1
1996	TRUE	Q9D7X3|DUS3_MOUSE	40.66	34.59	5	5		6830.52	8183.27	7889.22	7634.33	1790.44	2208.2	2048.54	2015.73	0.264035	0.000195203	20472	Dual specificity protein phosphatase 3 OS=Mus musculus OX=10090 GN=Dusp3 PE=1 SV=1
2239	TRUE	Q4VC33|MAEA_MOUSE	31.21	9.09	3	3		171.256	164.178	187.081	174.172	50.0732	18.6569	59.5656	42.7652	0.245534	0.000736655	45336	E3 ubiquitin-protein transferase MAEA OS=Mus musculus OX=10090 GN=Maea PE=1 SV=1
2059	TRUE	Q6PDY2|AEDO_MOUSE	7.89	10.94	3	3		1771.65	911.821	1807.75	1497.07	833.889	974.9	1069.92	959.569	0.640963	0.148413	28372	2-aminoethanethiol dioxygenase OS=Mus musculus OX=10090 GN=Ado PE=1 SV=2
1291	TRUE	Q8R464|CADM4_MOUSE	42.43	23.45	8	8		5699.83	5827.36	5919.5	5815.57	9274.48	9793.81	9019.39	9362.56	1.60991	0.000115314	42723	Cell adhesion molecule 4 OS=Mus musculus OX=10090 GN=Cadm4 PE=1 SV=1
235	TRUE	Q9EQF6|DPYL5_MOUSE	25.65	40.07	21	21	Acetylation (Protein N-term); Oxidation (M)	15020.4	14755.3	14383.6	14719.7	8053.49	6270.23	8712.29	7678.67	0.521658	0.000726397	61516	Dihydropyrimidinase-related protein 5 OS=Mus musculus OX=10090 GN=Dpysl5 PE=1 SV=1
1	TRUE	Q9JHU4|DYHC1_MOUSE	5.64	36.8	173	173	Oxidation (M)	98727.2	98363.1	99268.1	98786.1	84123.7	87987.2	18530.3	63547.1	0.643279	0.19296	532045	Cytoplasmic dynein 1 heavy chain 1 OS=Mus musculus OX=10090 GN=Dync1h1 PE=1 SV=2
2933	TRUE	Q8BI08|MAL2_MOUSE	44.12	17.71	2	2	Acetylation (Protein N-term)	6971.62	7181.62	7493.32	7215.52	4130.29	4366.04	4294.11	4263.48	0.590876	5.99295e-05	19094	Protein MAL2 OS=Mus musculus OX=10090 GN=Mal2 PE=1 SV=1
698	TRUE	Q80T41|GABR2_MOUSE	4.62	9.57	9	9	Oxidation (M)	3235.9	2543.05	3159.87	2979.61	2783.41	2503.28	2833.05	2706.58	0.908369	0.322689	105666	Gamma-aminobutyric acid type B receptor subunit 2 OS=Mus musculus OX=10090 GN=Gabbr2 PE=1 SV=2
2201	TRUE	Q80Z10|ASTN2_MOUSE	8.25	0.74	1	1		254.314	239.421	343.042	278.926	182.462	219.109	245.901	215.824	0.773768	0.165124	149390	Astrotactin-2 OS=Mus musculus OX=10090 GN=Astn2 PE=1 SV=2
1924	TRUE	Q8CHK3|MBOA7_MOUSE	4.95	7.82	4	4		434.565	446.254	502.381	461.067	443.613	428.842	438.368	436.941	0.947674	0.322092	53436	Lysophospholipid acyltransferase 7 OS=Mus musculus OX=10090 GN=Mboat7 PE=1 SV=1
1762	FALSE	Q8R2E9|ERO1B_MOUSE	36.95	2.36	1	1		245.415	212.82	216.17	224.802	71.5483	83.9551	88.5394	81.3476	0.361864	0.000239891	53518	ERO1-like protein beta OS=Mus musculus OX=10090 GN=Ero1b PE=1 SV=1
3057	TRUE	P56135|ATPK_MOUSE	38.22	26.14	2	2		9883.42	9028.78	8388.15	9100.12	4065.76	4018.02	4409.4	4164.39	0.45762	0.000393646	10344	ATP synthase subunit f, mitochondrial OS=Mus musculus OX=10090 GN=Atp5mf PE=1 SV=3
1953	TRUE	Q8K4Z3|NNRE_MOUSE	19.85	15.96	4	4		4124.97	3439.28	5848.08	4470.78	1269.55	1944.91	944.243	1386.23	0.310066	0.0163843	30973	NAD(P)H-hydrate epimerase OS=Mus musculus OX=10090 GN=Naxe PE=1 SV=1
720	TRUE	P48758|CBR1_MOUSE	22.53	44.04	12	11	Acetylation (Protein N-term)	4546.2	4571.55	3529.93	4215.89	2235.09	2335.33	1711.25	2093.89	0.496666	0.00573942	30641	Carbonyl reductase [NADPH] 1 OS=Mus musculus OX=10090 GN=Cbr1 PE=1 SV=3
2157	TRUE	Q9JI90|RNF14_MOUSE	41.55	8.66	4	4		2682.56	2596.33	2493.49	2590.79	874.816	726.451	884.242	828.503	0.319787	1.92593e-05	54926	E3 ubiquitin-protein ligase RNF14 OS=Mus musculus OX=10090 GN=Rnf14 PE=1 SV=2
464	TRUE	P63328|PP2BA_MOUSE	45.47	21.5	16	10	Oxidation (M)	65427.1	62597	62378.2	63467.4	43184.9	43513.1	42107.5	42935.2	0.676491	4.34171e-05	58644	Protein phosphatase 3 catalytic subunit alpha OS=Mus musculus OX=10090 GN=Ppp3ca PE=1 SV=1
2169	TRUE	Q9DCS3|MECR_MOUSE	26.5	6.43	2	2		232.487	291.599	288.909	270.998	148.959	160.093	160.854	156.635	0.577994	0.00434071	40343	Enoyl-[acyl-carrier-protein] reductase, mitochondrial OS=Mus musculus OX=10090 GN=Mecr PE=1 SV=2
601	TRUE	Q9CPY7|AMPL_MOUSE	28.83	26.2	13	13		3542.2	2776.34	2936.3	3084.95	1375.07	1246.37	1564.22	1395.22	0.452267	0.00253071	56141	Cytosol aminopeptidase OS=Mus musculus OX=10090 GN=Lap3 PE=1 SV=3
3	TRUE	O88737|BSN_MOUSE	27.87	39.07	124	120	Oxidation (M)	30975.4	32299.7	33446.7	32240.6	39230.2	40908.2	42313.4	40817.3	1.26602	0.00168194	418843	Protein bassoon OS=Mus musculus OX=10090 GN=Bsn PE=1 SV=4
2761	TRUE	Q8VCM8|NCLN_MOUSE	45.19	1.95	1	1		44.6353	87.281	57.636	63.1841	18.6569	18.6569	18.6569	18.6569	0.295278	0.024264	62908	BOS complex subunit NCLN OS=Mus musculus OX=10090 GN=Ncln PE=1 SV=2
526	TRUE	P59764|DOCK4_MOUSE	0.83	7.18	13	13		551.433	1994.53	2069.82	1538.59	1054.62	699.072	2109.83	1287.84	0.837024	0.719628	226550	Dedicator of cytokinesis protein 4 OS=Mus musculus OX=10090 GN=Dock4 PE=1 SV=1
3182	FALSE	Q9Z172|SUMO3_MOUSE	15.54	10.91	1	1		694.064	973.246	1148.36	938.555	397.314	206.134	477.813	360.42	0.384016	0.0202512	12430	Small ubiquitin-related modifier 3 OS=Mus musculus OX=10090 GN=Sumo3 PE=1 SV=1
2563	TRUE	Q78JE5|FBX22_MOUSE	7.15	3.98	1	1		109.764	133.712	158.428	133.968	104.44	102.54	123.124	110.035	0.821349	0.197626	44203	F-box only protein 22 OS=Mus musculus OX=10090 GN=Fbxo22 PE=1 SV=2
2233	TRUE	Q3THE2|ML12B_MOUSE	47.42	33.14	4	4		3429.79	3091.19	2793.18	3104.72	751.179	734.44	743.416	743.012	0.239317	0.000212224	19779	Myosin regulatory light chain 12B OS=Mus musculus OX=10090 GN=Myl12b PE=1 SV=2
2435	TRUE	Q5FWH7|S39AC_MOUSE	0.13	1.6	1	1		106.042	229.91	206.824	180.925	184.487	140.334	200.854	175.225	0.968493	0.898851	76215	Zinc transporter ZIP12 OS=Mus musculus OX=10090 GN=Slc39a12 PE=1 SV=1
1829	TRUE	D3YXK2|SAFB1_MOUSE	13.18	2.77	3	3		1256.13	1047.18	613.291	972.198	430.083	589.069	398.321	472.491	0.486003	0.0653613	105104	Scaffold attachment factor B1 OS=Mus musculus OX=10090 GN=Safb PE=1 SV=2
1209	TRUE	Q9JLT4|TRXR2_MOUSE	6.51	11.26	6	6		6627.77	10563.7	22607.3	13266.2	6750.88	8129.06	5820.15	6900.03	0.52012	0.259832	56572	Thioredoxin reductase 2, mitochondrial OS=Mus musculus OX=10090 GN=Txnrd2 PE=1 SV=4
2284	TRUE	O35343|IMA3_MOUSE	12.82	2.69	2	1		153.365	136.23	223.451	171.016	87.8627	117.469	109.51	104.947	0.613669	0.0784742	57923	Importin subunit alpha-3 OS=Mus musculus OX=10090 GN=Kpna4 PE=1 SV=1
2010	TRUE	P24547|IMDH2_MOUSE	33.08	5.45	3	3		768.155	670.585	750.417	729.719	341.963	402.108	343.817	362.629	0.496944	0.000516729	55815	Inosine-5'-monophosphate dehydrogenase 2 OS=Mus musculus OX=10090 GN=Impdh2 PE=1 SV=2
3296	TRUE	Q9CWW6|PIN4_MOUSE	12.26	9.16	1	1		112.823	138.588	142.007	131.139	18.6569	18.6569	57.0821	31.4653	0.239938	0.00321071	13815	Peptidyl-prolyl cis-trans isomerase NIMA-interacting 4 OS=Mus musculus OX=10090 GN=Pin4 PE=1 SV=1
1112	TRUE	Q9CTY5|MICU3_MOUSE	26.07	13.58	6	6		717.914	822.479	897.988	812.794	453.826	400.706	490.225	448.252	0.551496	0.00333996	59810	Calcium uptake protein 3, mitochondrial OS=Mus musculus OX=10090 GN=Micu3 PE=2 SV=2
2697	FALSE	Q6ZWY3|RS27L_MOUSE	39.12	15.48	1	1		1974.55	2173.55	2237.18	2128.43	1168.2	1108.29	1169.5	1148.66	0.539677	0.000276273	9477	40S ribosomal protein S27-like OS=Mus musculus OX=10090 GN=Rps27l PE=1 SV=3
1629	TRUE	P57776|EF1D_MOUSE	21.27	25.27	5	5	Acetylation (Protein N-term)	1657.48	1686.4	1806.94	1716.94	678.961	954.401	1044.81	892.724	0.51995	0.00229249	31293	Elongation factor 1-delta OS=Mus musculus OX=10090 GN=Eef1d PE=1 SV=3
944	TRUE	Q99MR8|MCCA_MOUSE	9.39	10.74	7	7		881.995	1270.26	1363.94	1172.06	708.935	900.222	920.356	843.171	0.71939	0.112488	79344	Methylcrotonoyl-CoA carboxylase subunit alpha, mitochondrial OS=Mus musculus OX=10090 GN=Mccc1 PE=1 SV=2
961	FALSE	Q9CW42|MARC1_MOUSE	2.97	2.35	2	2		596.664	581.232	479.252	552.382	581.655	145.275	668.213	465.048	0.841895	0.626563	37979	Mitochondrial amidoxime-reducing component 1 OS=Mus musculus OX=10090 GN=Mtarc1 PE=1 SV=2
1538	TRUE	Q8CIG8|ANM5_MOUSE	27.72	9.58	6	6		2937.56	2863.18	2994.63	2931.79	1333.61	1706.18	1705.72	1581.84	0.539547	0.000482942	72680	Protein arginine N-methyltransferase 5 OS=Mus musculus OX=10090 GN=Prmt5 PE=1 SV=3
1602	TRUE	Q8C437|PEX5R_MOUSE	23.21	5.64	3	3		722.188	590.839	603.156	638.728	378.994	339.295	270.928	329.739	0.516244	0.00414915	63135	PEX5-related protein OS=Mus musculus OX=10090 GN=Pex5l PE=1 SV=2
2427	TRUE	Q8BP71|RFOX2_MOUSE	11.56	3.34	2	1		156.404	109.745	159.157	141.769	18.6569	18.6569	71.9436	36.4191	0.256891	0.0116644	47330	RNA binding protein fox-1 homolog 2 OS=Mus musculus OX=10090 GN=Rbfox2 PE=1 SV=2
1439	FALSE	P86048|RL10L_MOUSE	50.57	18.69	5	5		13934	13464	14172.7	13856.9	7571.11	7502.89	7859.17	7644.39	0.551667	1.21849e-05	24558	60S ribosomal protein L10-like OS=Mus musculus OX=10090 GN=Rpl10l PE=1 SV=1
967	TRUE	Q99L47|F10A1_MOUSE	52.31	22.91	9	9		9190.33	9047.47	8143.65	8793.82	2463.87	2547.72	2456.63	2489.4	0.283086	4.36978e-05	41656	Hsc70-interacting protein OS=Mus musculus OX=10090 GN=St13 PE=1 SV=1
2667	FALSE	Q9JLH8|TMOD4_MOUSE	12.86	3.19	1	1		128.011	214.532	217.256	186.6	57.9116	78.9722	125.545	87.4763	0.468792	0.0490787	39261	Tropomodulin-4 OS=Mus musculus OX=10090 GN=Tmod4 PE=2 SV=1
1210	TRUE	Q925N0|SFXN5_MOUSE	38.32	18.42	6	6		5949.95	6274.88	5669.36	5964.73	3445.47	3400.12	3671.68	3505.76	0.587748	0.000223439	37329	Sideroflexin-5 OS=Mus musculus OX=10090 GN=Sfxn5 PE=1 SV=2
2455	TRUE	Q91XD7|CREL1_MOUSE	34.76	6.9	3	3		3528.1	3796.93	3908.51	3744.51	1477.49	1080.71	1223.51	1260.57	0.336644	0.000105272	45718	Protein disulfide isomerase Creld1 OS=Mus musculus OX=10090 GN=Creld1 PE=1 SV=1
3965	TRUE	Q8R5A3|AB1IP_MOUSE	0.45	1.34	1	1		517.181	703.153	542.286	587.54	584.514	637.949	504.984	575.816	0.980045	0.874936	74319	Amyloid beta A4 precursor protein-binding family B member 1-interacting protein OS=Mus musculus OX=10090 GN=Apbb1ip PE=1 SV=2
153	TRUE	P26039|TLN1_MOUSE	5.1	6.26	21	14		1096.5	1212.93	1220.53	1176.65	1377.1	1341.7	1128.07	1282.29	1.08978	0.293971	269821	Talin-1 OS=Mus musculus OX=10090 GN=Tln1 PE=1 SV=2
312	TRUE	P06745|G6PI_MOUSE	71.26	34.59	17	17	Oxidation (M)	44299.9	44879.6	44469.6	44549.7	25454	25082.5	25131.4	25222.6	0.566168	8.01587e-08	62767	Glucose-6-phosphate isomerase OS=Mus musculus OX=10090 GN=Gpi PE=1 SV=4
3164	TRUE	Q8CI32|BAG5_MOUSE	19.58	1.79	1	1		346.847	328.642	263.377	312.955	212.118	203.107	217.659	210.961	0.674095	0.0165416	50943	BAG family molecular chaperone regulator 5 OS=Mus musculus OX=10090 GN=Bag5 PE=1 SV=1
2172	TRUE	Q60865|CAPR1_MOUSE	30.24	4.81	3	3		2124.32	2168.57	2193.85	2162.24	830.937	626.524	923.536	793.666	0.367057	0.000109356	78169	Caprin-1 OS=Mus musculus OX=10090 GN=Caprin1 PE=1 SV=2
561	TRUE	Q69ZR2|HECD1_MOUSE	3.32	4.7	11	11		753.559	653.684	565.342	657.528	612.284	649.377	557.995	606.552	0.922473	0.446877	290086	E3 ubiquitin-protein ligase HECTD1 OS=Mus musculus OX=10090 GN=Hectd1 PE=1 SV=2
2492	TRUE	Q80ZD8|AMGO1_MOUSE	1.11	4.07	2	2		185.601	194.197	223.725	201.175	507.227	373.698	73.8588	318.261	1.58201	0.414262	55343	Amphoterin-induced protein 1 OS=Mus musculus OX=10090 GN=Amigo1 PE=1 SV=1
1577	TRUE	Q9DC51|GNAI3_MOUSE	49.07	4.24	4	1		1251.49	1335.87	1362.11	1316.49	640.385	615.127	627.194	627.569	0.476699	3.56686e-05	40538	Guanine nucleotide-binding protein G(i) subunit alpha-3 OS=Mus musculus OX=10090 GN=Gnai3 PE=1 SV=3
1296	TRUE	Q8BIW1|PRUN1_MOUSE	6.55	11.89	5	5		1055.29	1466.93	1370.81	1297.67	907.256	781.505	1328.04	1005.6	0.774925	0.230712	50239	Exopolyphosphatase PRUNE1 OS=Mus musculus OX=10090 GN=Prune1 PE=1 SV=1
1007	TRUE	O35678|MGLL_MOUSE	34	32.34	9	9		5262.26	5672.33	5461.62	5465.4	2278.9	1669.03	2018.71	1988.88	0.363904	8.19884e-05	33388	Monoglyceride lipase OS=Mus musculus OX=10090 GN=Mgll PE=1 SV=1
2261	TRUE	Q8R3F5|FABD_MOUSE	6.91	10.5	3	3		464.303	395.02	647.694	502.339	370.8	413.334	393.412	392.515	0.781375	0.223823	41928	Malonyl-CoA-acyl carrier protein transacylase, mitochondrial OS=Mus musculus OX=10090 GN=Mcat PE=1 SV=3
2634	TRUE	Q8BMA6|SRP68_MOUSE	1.26	1.44	1	1		63.6	88.4457	90.4065	80.8174	102.276	107.174	58.5353	89.3286	1.10531	0.655833	70574	Signal recognition particle subunit SRP68 OS=Mus musculus OX=10090 GN=Srp68 PE=1 SV=2
780	TRUE	Q6P1B1|XPP1_MOUSE	27.94	19.42	11	11		2231.43	2187.9	2105.39	2174.91	697.653	1063.38	813.571	858.202	0.394593	0.000321649	69591	Xaa-Pro aminopeptidase 1 OS=Mus musculus OX=10090 GN=Xpnpep1 PE=1 SV=1
166	TRUE	P16330|CN37_MOUSE	76.23	42.14	24	24	Oxidation (M)	74747.6	75062.7	74224.8	74678.4	45090.3	44722.8	44893	44902	0.601272	3.84302e-08	47123	2',3'-cyclic-nucleotide 3'-phosphodiesterase OS=Mus musculus OX=10090 GN=Cnp PE=1 SV=3
2599	TRUE	P58044|IDI1_MOUSE	15.9	9.25	2	2		1067.9	3444.8	2331.97	2281.55	421.029	679.01	615.886	571.975	0.250695	0.0686438	26289	Isopentenyl-diphosphate Delta-isomerase 1 OS=Mus musculus OX=10090 GN=Idi1 PE=1 SV=1
264	TRUE	Q8BHN3|GANAB_MOUSE	33.68	24.05	20	20		3102.35	3503.91	3516.7	3374.32	1670.75	1889.36	1884.65	1814.92	0.537863	0.000534877	106911	Neutral alpha-glucosidase AB OS=Mus musculus OX=10090 GN=Ganab PE=1 SV=1
3916	TRUE	Q811I0|ATPF1_MOUSE	1.65	2.78	1	1		158.416	205.393	188.729	184.179	176.168	196.677	154.733	175.859	0.954828	0.673321	36354	ATP synthase mitochondrial F1 complex assembly factor 1 OS=Mus musculus OX=10090 GN=Atpaf1 PE=1 SV=1
2051	TRUE	Q6IMF0|KRT87_MOUSE	31.89	2.02	4	1		1329.67	1627.46	1717.62	1558.25	156.799	110.876	238.661	168.779	0.108313	0.000350287	54629	Keratin, type II cuticular 87 OS=Mus musculus OX=10090 GN=Krt87 PE=2 SV=2
2018	TRUE	O70503|DHB12_MOUSE	25.26	18.27	5	5		1847.72	1913.31	1680.6	1813.88	985.632	1210.26	943.244	1046.38	0.576874	0.00207113	34742	Very-long-chain 3-oxoacyl-CoA reductase OS=Mus musculus OX=10090 GN=Hsd17b12 PE=1 SV=1
1772	TRUE	Q8QZV4|ST32C_MOUSE	20.29	7.58	3	3		1036.8	867.903	1176.83	1027.18	417.226	488.709	631.481	512.472	0.498913	0.00924095	55263	Serine/threonine-protein kinase 32C OS=Mus musculus OX=10090 GN=Stk32c PE=1 SV=1
2198	TRUE	P36552|HEM6_MOUSE	5.62	2.03	1	1		100.62	110.582	148.157	119.786	95.8578	86.0961	115.356	99.1033	0.827333	0.286611	49715	Oxygen-dependent coproporphyrinogen-III oxidase, mitochondrial OS=Mus musculus OX=10090 GN=Cpox PE=1 SV=2
3658	TRUE	Q91YL2|RN126_MOUSE	0.97	3.19	1	1		387.534	212.824	294.093	298.15	10668.7	88.5626	93.9866	3617.07	12.1317	0.39988	34081	E3 ubiquitin-protein ligase RNF126 OS=Mus musculus OX=10090 GN=Rnf126 PE=1 SV=1
1165	FALSE	Q9CYI4|LUC7L_MOUSE	30.55	5.93	2	2		322.093	281.005	248.189	283.762	154.887	104.919	117.44	125.749	0.443148	0.00376855	43934	Putative RNA-binding protein Luc7-like 1 OS=Mus musculus OX=10090 GN=Luc7l PE=1 SV=2
1165	TRUE	Q7TNC4|LC7L2_MOUSE	30.55	12.24	4	4		1025.3	1066.43	1182.14	1091.29	639.779	524.771	573.938	579.496	0.531021	0.000884644	46583	Putative RNA-binding protein Luc7-like 2 OS=Mus musculus OX=10090 GN=Luc7l2 PE=1 SV=1
2944	FALSE	Q8VEJ9|VPS4A_MOUSE	27.1	2.75	1	1		312.462	283.037	315.643	303.714	200.672	193.849	166.241	186.921	0.61545	0.00138819	48907	Vacuolar protein sorting-associated protein 4A OS=Mus musculus OX=10090 GN=Vps4a PE=1 SV=1
3338	TRUE	P62996|TRA2B_MOUSE	8.41	3.47	1	1		198.864	156.303	171.202	175.456	97.7778	140.367	159.898	132.681	0.756204	0.125988	33666	Transformer-2 protein homolog beta OS=Mus musculus OX=10090 GN=Tra2b PE=1 SV=1
1063	TRUE	Q8BYM5|NLGN3_MOUSE	13.55	6.79	7	4		445.793	390.294	345.523	393.87	56.7114	152.152	211.158	140.007	0.355465	0.00902239	91162	Neuroligin-3 OS=Mus musculus OX=10090 GN=Nlgn3 PE=1 SV=2
2750	TRUE	P70663|SPRL1_MOUSE	17.58	3.69	2	2		379.444	466.539	714.212	520.065	60.8959	146.742	174.365	127.334	0.244843	0.0207041	72287	SPARC-like protein 1 OS=Mus musculus OX=10090 GN=Sparcl1 PE=1 SV=3
2159	TRUE	Q8BGA3|LRRT2_MOUSE	11.69	2.14	1	1		255.933	106.344	202.546	188.274	98.4576	74.9923	95.1418	89.5306	0.475532	0.0901034	58816	Leucine-rich repeat transmembrane neuronal protein 2 OS=Mus musculus OX=10090 GN=Lrrtm2 PE=2 SV=1
2138	TRUE	Q9Z2I8|SUCB2_MOUSE	25.43	7.39	3	3		371.881	443.658	410.115	408.551	294.034	267.462	276.123	279.206	0.683406	0.00429579	46840	Succinate--CoA ligase [GDP-forming] subunit beta, mitochondrial OS=Mus musculus OX=10090 GN=Suclg2 PE=1 SV=3
4135	TRUE	P63089|PTN_MOUSE	31.27	6.55	1	1		594.628	577.657	676.751	616.346	213.569	263.693	281.327	252.863	0.410262	0.000584384	18869	Pleiotrophin OS=Mus musculus OX=10090 GN=Ptn PE=1 SV=1
409	TRUE	Q8QZT1|THIL_MOUSE	40.55	38.21	16	16	Oxidation (M)	33688.8	30398.6	29702.1	31263.2	15747.1	15886.1	14899.2	15510.8	0.496136	0.00024099	44816	Acetyl-CoA acetyltransferase, mitochondrial OS=Mus musculus OX=10090 GN=Acat1 PE=1 SV=1
656	TRUE	P97789|XRN1_MOUSE	5.19	4.83	8	8		453.297	462.016	321.893	412.402	507.946	405.554	559.257	490.919	1.19039	0.287134	194307	5'-3' exoribonuclease 1 OS=Mus musculus OX=10090 GN=Xrn1 PE=1 SV=1
2979	TRUE	A2ARS0|ANR63_MOUSE	19.98	5.9	2	2		332.482	284.121	403.333	339.979	45.7544	86.2249	126.854	86.2778	0.253774	0.00371904	41068	Ankyrin repeat domain-containing protein 63 OS=Mus musculus OX=10090 GN=Ankrd63 PE=1 SV=1
2738	TRUE	Q9ERR1|NDEL1_MOUSE	31.27	6.67	2	2		437.37	374.388	390.384	400.714	186.888	204.343	225.934	205.722	0.513388	0.000897606	38366	Nuclear distribution protein nudE-like 1 OS=Mus musculus OX=10090 GN=Ndel1 PE=1 SV=2
4022	TRUE	Q8VHK5|MLC1_MOUSE	4.76	3.4	1	1		164.869	147.56	175.933	162.787	139.485	101.565	174.957	138.669	0.851843	0.348705	41596	Membrane protein MLC1 OS=Mus musculus OX=10090 GN=Mlc1 PE=1 SV=1
694	FALSE	A2A8L5|PTPRF_MOUSE	10.66	0.74	2	1		155.95	323.118	322.854	267.307	37.9246	40.7733	194.73	91.1426	0.340966	0.0814509	211489	Receptor-type tyrosine-protein phosphatase F OS=Mus musculus OX=10090 GN=Ptprf PE=1 SV=1
750	TRUE	Q9CPV4|GLOD4_MOUSE	36.96	54.36	14	14		6215.55	6990.77	5473.27	6226.53	1676.94	2064.11	1805.82	1848.96	0.296948	0.000639604	33317	Glyoxalase domain-containing protein 4 OS=Mus musculus OX=10090 GN=Glod4 PE=1 SV=1
143	TRUE	Q9D6F9|TBB4A_MOUSE	58.98	15.99	20	5	Oxidation (M)	151266	152831	148393	150830	69889.8	66989.7	69999.5	68959.6	0.457201	9.42239e-07	49586	Tubulin beta-4A chain OS=Mus musculus OX=10090 GN=Tubb4a PE=1 SV=3
2592	TRUE	Q91VR7|MLP3A_MOUSE	37.28	11.57	2	2		2716.47	2858.03	3188.05	2920.85	1285.37	1213.83	1091.29	1196.83	0.409754	0.00033369	14272	Microtubule-associated proteins 1A/1B light chain 3A OS=Mus musculus OX=10090 GN=Map1lc3a PE=1 SV=1
573	TRUE	Q8K400|STXB5_MOUSE	8.52	8.33	8	7		2594.55	2311.97	1759.03	2221.85	1819.56	1714.33	1781.07	1771.65	0.797376	0.142784	127651	Syntaxin-binding protein 5 OS=Mus musculus OX=10090 GN=Stxbp5 PE=1 SV=3
3179	TRUE	Q9Z2D1|MTMR2_MOUSE	6.54	1.4	1	1		254.4	239.279	139.235	210.971	150.732	174.673	129.485	151.63	0.718725	0.197326	73232	Myotubularin-related protein 2 OS=Mus musculus OX=10090 GN=Mtmr2 PE=1 SV=3
1846	TRUE	Q8C522|ENDD1_MOUSE	31.9	11.18	5	5		1818.93	1642.39	1885.16	1782.16	812.115	984.155	925.771	907.347	0.509128	0.000583235	55262	Endonuclease domain-containing 1 protein OS=Mus musculus OX=10090 GN=Endod1 PE=1 SV=2
2825	TRUE	Q8K221|ARFP2_MOUSE	12.44	3.23	1	1		483.889	358.798	525.499	456.062	365.054	227.795	256.009	282.953	0.620426	0.056863	37773	Arfaptin-2 OS=Mus musculus OX=10090 GN=Arfip2 PE=1 SV=2
3704	TRUE	P49817|CAV1_MOUSE	18.81	4.49	1	1		236.82	292.764	190.112	239.899	481.888	516.104	381.311	459.768	1.91651	0.0118512	20539	Caveolin-1 OS=Mus musculus OX=10090 GN=Cav1 PE=1 SV=1
523	TRUE	Q6PNC0|DMXL1_MOUSE	10.59	2.69	9	7		2888.05	3300.66	3299.07	3162.6	2251.78	2968.39	2534.49	2584.89	0.817331	0.081579	336008	DmX-like protein 1 OS=Mus musculus OX=10090 GN=Dmxl1 PE=1 SV=1
1212	TRUE	Q8BKZ9|ODPX_MOUSE	26.33	12.97	6	6		2438.36	2920.88	2911.89	2757.04	1362.04	1562.36	1675.47	1533.29	0.556136	0.00264491	53999	Pyruvate dehydrogenase protein X component, mitochondrial OS=Mus musculus OX=10090 GN=Pdhx PE=1 SV=1
1914	TRUE	O88485|DC1I1_MOUSE	23.77	9.08	4	4		1671.04	1692.71	2032.89	1798.88	1072.79	1143.92	1237.32	1151.34	0.640032	0.00688876	70725	Cytoplasmic dynein 1 intermediate chain 1 OS=Mus musculus OX=10090 GN=Dync1i1 PE=1 SV=2
26	TRUE	Q7TSJ2|MAP6_MOUSE	23.72	68.98	52	52	Oxidation (M)	35300.7	33167.6	36024.4	34830.9	25505.1	25456.8	28675.4	26545.8	0.762133	0.00374393	96450	Microtubule-associated protein 6 OS=Mus musculus OX=10090 GN=Map6 PE=1 SV=2
202	TRUE	Q61316|HSP74_MOUSE	35.34	33.06	25	24		10949.4	10399.1	10044	10464.2	7287.86	7559.38	7599.86	7482.37	0.715045	0.000446508	94133	Heat shock 70 kDa protein 4 OS=Mus musculus OX=10090 GN=Hspa4 PE=1 SV=1
3451	TRUE	Q99MB7|RN141_MOUSE	34.96	5.65	1	1		547.26	549.229	462.543	519.677	244.427	218.18	244.53	235.712	0.453574	0.000684892	25529	RING finger protein 141 OS=Mus musculus OX=10090 GN=Rnf141 PE=1 SV=2
1575	TRUE	Q6GYP7|RGPA1_MOUSE	6.38	0.54	1	1		75.2762	18.6569	58.7888	50.9073	59.7732	57.8391	54.8654	57.4926	1.12936	0.716224	229389	Ral GTPase-activating protein subunit alpha-1 OS=Mus musculus OX=10090 GN=Ralgapa1 PE=1 SV=1
2556	TRUE	Q6PAL7|AHDC1_MOUSE	2.06	0.88	1	1		71.2835	111.423	73.049	85.2518	90.278	71.088	69.0934	76.8198	0.901093	0.59777	168081	Transcription factor Gibbin OS=Mus musculus OX=10090 GN=Ahdc1 PE=1 SV=1
1408	TRUE	Q9CQW2|ARL8B_MOUSE	31.43	4.84	4	1		1356.99	1139.16	1262.32	1252.82	635.774	565.035	502.991	567.933	0.453323	0.000750409	21539	ADP-ribosylation factor-like protein 8B OS=Mus musculus OX=10090 GN=Arl8b PE=1 SV=1
1762	TRUE	Q8R180|ERO1A_MOUSE	36.65	13.36	6	6		4862.07	5357.24	5283.84	5167.72	1873.86	2241.33	2278.6	2131.27	0.412419	0.000112366	54084	ERO1-like protein alpha OS=Mus musculus OX=10090 GN=Ero1a PE=1 SV=2
1289	TRUE	Q62443|NPTX1_MOUSE	25.6	10.19	6	6		2564.4	2680.78	2804.68	2683.29	1051.65	1182.33	1544.91	1259.63	0.469436	0.000947676	47117	Neuronal pentraxin-1 OS=Mus musculus OX=10090 GN=Nptx1 PE=1 SV=1
2542	TRUE	Q5SNZ0|GRDN_MOUSE	6.18	0.59	1	1		617.441	520.993	758.381	632.271	590.492	532.077	431.399	517.989	0.819251	0.241177	215918	Girdin OS=Mus musculus OX=10090 GN=Ccdc88a PE=1 SV=2
1669	TRUE	Q99L04|DHRS1_MOUSE	30.76	9.58	3	3		1579.85	1662.79	1318.76	1520.46	745.416	667.009	614.694	675.706	0.444408	0.00156736	34005	Dehydrogenase/reductase SDR family member 1 OS=Mus musculus OX=10090 GN=Dhrs1 PE=1 SV=1
2233	FALSE	Q9CQ19|MYL9_MOUSE	51.54	20.93	2	2		145.598	111.329	196.702	151.209	18.6569	18.6569	18.6569	18.6569	0.123384	0.00590952	19854	Myosin regulatory light polypeptide 9 OS=Mus musculus OX=10090 GN=Myl9 PE=1 SV=3
324	TRUE	Q61656|DDX5_MOUSE	19.08	16.78	16	10		4825.55	4149.09	4322.72	4432.45	1902.05	2855.35	2723.87	2493.76	0.562613	0.00578934	69290	Probable ATP-dependent RNA helicase DDX5 OS=Mus musculus OX=10090 GN=Ddx5 PE=1 SV=2
1368	TRUE	Q8BHG1|NRDC_MOUSE	2.09	1.72	2	2		219.144	310.52	358.193	295.953	284.282	268.443	250.285	267.67	0.904435	0.537245	132891	Nardilysin OS=Mus musculus OX=10090 GN=Nrdc PE=1 SV=1
1309	TRUE	P97441|ZNT3_MOUSE	22.92	20.36	6	6	Acetylation (Protein N-term); Oxidation (M)	1677.51	2470.8	2447.26	2198.52	912.827	1107.33	887.813	969.322	0.440897	0.0103536	41824	Probable proton-coupled zinc antiporter SLC30A3 OS=Mus musculus OX=10090 GN=Slc30a3 PE=1 SV=1
850	TRUE	P08414|KCC4_MOUSE	30.94	19.19	9	9		4038.52	3625.76	4318.38	3994.22	2155.95	2408.55	2327.67	2297.39	0.575179	0.00138184	52628	Calcium/calmodulin-dependent protein kinase type IV OS=Mus musculus OX=10090 GN=Camk4 PE=1 SV=2
8	TRUE	E9Q401|RYR2_MOUSE	19.56	16.55	83	75	Acetylation (Protein N-term); Oxidation (M)	3183.32	3314.86	3428.46	3308.88	3679.49	4054.78	3900.87	3878.38	1.17211	0.0118431	564819	Ryanodine receptor 2 OS=Mus musculus OX=10090 GN=Ryr2 PE=1 SV=1
2804	TRUE	Q9WUC3|LY6H_MOUSE	53.37	5.76	1	1		5876.31	5391.55	5740.07	5669.31	2264.11	2186.64	2201.89	2217.55	0.391149	1.91182e-05	14669	Lymphocyte antigen 6H OS=Mus musculus OX=10090 GN=Ly6h PE=1 SV=2
1463	TRUE	Q9JM76|ARPC3_MOUSE	33.64	23.6	4	4	Oxidation (M)	12028.4	12193.1	12028.3	12083.3	4504.02	5670.75	5698.07	5290.95	0.437874	6.86969e-05	20525	Actin-related protein 2/3 complex subunit 3 OS=Mus musculus OX=10090 GN=Arpc3 PE=1 SV=3
1384	TRUE	P83093|STIM2_MOUSE	4.88	6.03	4	4		701.532	523.451	588.806	604.596	321.865	505.234	638.322	488.474	0.807934	0.332635	83925	Stromal interaction molecule 2 OS=Mus musculus OX=10090 GN=Stim2 PE=1 SV=2
1202	TRUE	Q8BW96|KCC1D_MOUSE	28.07	18.18	6	5		1037.21	861.438	848.291	915.648	437.41	317.847	394.896	383.384	0.418703	0.00162603	42919	Calcium/calmodulin-dependent protein kinase type 1D OS=Mus musculus OX=10090 GN=Camk1d PE=1 SV=2
2297	TRUE	P98084|APBA2_MOUSE	23.79	2	2	1		155.274	188.452	127.347	157.025	82.7629	74.7569	75.6279	77.7159	0.494928	0.0112904	82758	Amyloid-beta A4 precursor protein-binding family A member 2 OS=Mus musculus OX=10090 GN=Apba2 PE=1 SV=2
3151	TRUE	Q80ZI6|LRSM1_MOUSE	8.37	1.51	1	1		79.7304	78.2793	71.6149	76.5415	79.338	82.7683	92.682	84.9294	1.10959	0.149991	83976	E3 ubiquitin-protein ligase LRSAM1 OS=Mus musculus OX=10090 GN=Lrsam1 PE=1 SV=1
2062	TRUE	Q8BUK6|HOOK3_MOUSE	26.02	7.52	4	4		654.236	601.291	650.625	635.384	436.023	352.748	350.197	379.656	0.597523	0.00148757	83218	Protein Hook homolog 3 OS=Mus musculus OX=10090 GN=Hook3 PE=1 SV=2
1790	TRUE	Q6WVG3|KCD12_MOUSE	11.1	11.93	4	3		727.742	765.181	608.647	700.523	276.072	443.048	569.611	429.577	0.613223	0.049475	35892	BTB/POZ domain-containing protein KCTD12 OS=Mus musculus OX=10090 GN=Kctd12 PE=1 SV=1
2536	TRUE	Q9DBL7|COASY_MOUSE	15.38	3.55	2	2		254.983	312.277	211.062	259.441	122.105	161.545	175.701	153.117	0.590181	0.0334396	62023	Bifunctional coenzyme A synthase OS=Mus musculus OX=10090 GN=Coasy PE=1 SV=2
2278	TRUE	P63280|UBC9_MOUSE	40.86	14.56	3	3		1235.72	1268.68	1201.53	1235.31	359.778	365.99	287.187	337.652	0.273334	9.45293e-06	18007	SUMO-conjugating enzyme UBC9 OS=Mus musculus OX=10090 GN=Ube2i PE=1 SV=1
2185	TRUE	Q9R0D8|WDR54_MOUSE	20.3	6.89	2	2		636.954	548.929	596.646	594.176	341.224	319.243	437.128	365.865	0.615751	0.00669402	35613	WD repeat-containing protein 54 OS=Mus musculus OX=10090 GN=Wdr54 PE=1 SV=1
1314	TRUE	Q9CPR4|RL17_MOUSE	14.27	36.96	7	7		7939.83	8577.98	8031.37	8183.06	4073.57	4286.59	1585.47	3315.21	0.405131	0.00542825	21423	60S ribosomal protein L17 OS=Mus musculus OX=10090 GN=Rpl17 PE=1 SV=3
541	TRUE	P14152|MDHC_MOUSE	60.68	40.42	15	15	Oxidation (M)	99587.8	96381.4	95451.9	97140.3	46644.2	46363.5	45620.3	46209.3	0.475696	2.4549e-06	36511	Malate dehydrogenase, cytoplasmic OS=Mus musculus OX=10090 GN=Mdh1 PE=1 SV=3
1387	TRUE	Q6P069|SORCN_MOUSE	28.22	33.84	7	7		3538.3	2909.43	3480.52	3309.42	1117.43	927.127	1416.61	1153.72	0.348618	0.000936494	21627	Sorcin OS=Mus musculus OX=10090 GN=Sri PE=1 SV=1
778	TRUE	Q8BG39|SV2B_MOUSE	52.75	10.69	8	8	Oxidation (M)	17657.9	17088.3	17326	17357.4	12648.2	12625.1	12545.3	12606.2	0.726274	9.31946e-06	77457	Synaptic vesicle glycoprotein 2B OS=Mus musculus OX=10090 GN=Sv2b PE=1 SV=1
1457	FALSE	Q3URE9|LIGO2_MOUSE	3.91	2.48	1	1		994.073	944.748	1012.52	983.78	1315.96	567.303	595.999	826.422	0.840047	0.556796	68069	Leucine-rich repeat and immunoglobulin-like domain-containing nogo receptor-interacting protein 2 OS=Mus musculus OX=10090 GN=Lingo2 PE=2 SV=1
1547	TRUE	O88545|CSN6_MOUSE	30.88	20.06	5	5		1544.88	1407.2	1681.26	1544.44	912.464	964.919	891.74	923.041	0.597652	0.00163016	35880	COP9 signalosome complex subunit 6 OS=Mus musculus OX=10090 GN=Cops6 PE=1 SV=1
1436	TRUE	Q9Z0H4|CELF2_MOUSE	16.34	7.68	6	6		2362.82	2357.35	2041.56	2253.91	1070.4	1368.01	1697.6	1378.67	0.61168	0.0140489	54271	CUGBP Elav-like family member 2 OS=Mus musculus OX=10090 GN=Celf2 PE=1 SV=1
2502	TRUE	O35454|CLCN6_MOUSE	0.6	1.03	1	1		82.5498	18.6569	56.649	52.6185	58.7151	85.7966	56.4645	66.9921	1.27316	0.527752	96980	H(+)/Cl(-) exchange transporter 6 OS=Mus musculus OX=10090 GN=Clcn6 PE=1 SV=1
1622	TRUE	P70302|STIM1_MOUSE	15.66	3.21	2	2		422.273	212.883	281.349	305.502	162.961	127.131	140.719	143.604	0.470059	0.0607098	77567	Stromal interaction molecule 1 OS=Mus musculus OX=10090 GN=Stim1 PE=1 SV=2
1650	TRUE	P32020|SCP2_MOUSE	24.26	8.96	5	5		1112.53	978.684	986.279	1025.83	437.236	622.962	530.2	530.133	0.516783	0.00198673	59126	Sterol carrier protein 2 OS=Mus musculus OX=10090 GN=Scp2 PE=1 SV=3
625	TRUE	Q8BWT5|DIP2A_MOUSE	26.22	7.03	11	10		4523.08	4507.22	4542.81	4524.37	2612.27	2415.3	3117.32	2714.97	0.600076	0.000984963	165255	Disco-interacting protein 2 homolog A OS=Mus musculus OX=10090 GN=Dip2a PE=1 SV=3
1883	FALSE	Q8BHG3|CC50B_MOUSE	29.4	2.27	1	1		1258.48	1101.15	1118.03	1159.22	592.186	533.076	673.573	599.612	0.517255	0.000964827	39218	Cell cycle control protein 50B OS=Mus musculus OX=10090 GN=Tmem30b PE=2 SV=1
42	TRUE	Q71LX4|TLN2_MOUSE	4.89	14.48	35	28	Oxidation (M)	1973.29	1821.75	2394.92	2063.32	2700.82	2126.22	2180.58	2335.88	1.1321	0.338405	253621	Talin-2 OS=Mus musculus OX=10090 GN=Tln2 PE=1 SV=3
1121	TRUE	Q9QZ06|TOLIP_MOUSE	46.28	41.24	10	10	Acetylation (Protein N-term)	4100.65	4624.02	4390.77	4371.81	1403.43	1506.26	1327.52	1412.4	0.32307	5.0273e-05	30345	Toll-interacting protein OS=Mus musculus OX=10090 GN=Tollip PE=1 SV=1
2377	TRUE	Q3UUI3|THEM4_MOUSE	27.71	12.61	3	3		1450.99	1473.96	1300.27	1408.41	723.076	507.552	529.681	586.77	0.41662	0.000716062	26031	Acyl-coenzyme A thioesterase THEM4 OS=Mus musculus OX=10090 GN=Them4 PE=1 SV=1
1372	TRUE	O08582|GTPB1_MOUSE	22	6.74	4	4		1047.67	911.735	916.554	958.652	359.992	573.41	383.768	439.057	0.457994	0.00301926	72301	GTP-binding protein 1 OS=Mus musculus OX=10090 GN=Gtpbp1 PE=1 SV=2
1084	TRUE	P28658|ATX10_MOUSE	11.36	16.63	7	7		1115.2	1139.39	1347.8	1200.8	1007.12	371.018	526.158	634.765	0.528621	0.0509523	53707	Ataxin-10 OS=Mus musculus OX=10090 GN=Atxn10 PE=1 SV=2
2211	TRUE	Q8BGD9|IF4B_MOUSE	1.4	2.62	1	1		151.749	155.421	113.701	140.29	156.872	140.108	137.951	144.977	1.03341	0.764509	68840	Eukaryotic translation initiation factor 4B OS=Mus musculus OX=10090 GN=Eif4b PE=1 SV=1
1917	TRUE	P58871|TB182_MOUSE	0.31	2.03	2	2		361.877	464.481	171.836	332.731	161.47	457.13	347.038	321.879	0.967384	0.933189	181825	182 kDa tankyrase-1-binding protein OS=Mus musculus OX=10090 GN=Tnks1bp1 PE=1 SV=2
740	TRUE	P97393|RHG05_MOUSE	11.79	5.46	7	7		635.083	675.332	574.812	628.409	426.045	572.507	485.06	494.538	0.786968	0.060423	172472	Rho GTPase-activating protein 5 OS=Mus musculus OX=10090 GN=Arhgap5 PE=1 SV=3
560	TRUE	Q920P3|BRNP1_MOUSE	35	10	8	8		2522.84	2379.41	2881.02	2594.42	899.693	1040.57	819.643	919.97	0.354595	0.00050084	88641	BMP/retinoic acid-inducible neural-specific protein 1 OS=Mus musculus OX=10090 GN=Brinp1 PE=1 SV=1
2467	TRUE	Q9DC23|DJC10_MOUSE	2.46	1.13	1	1		309.13	147.032	320.506	258.889	251.857	258.771	110.596	207.075	0.799859	0.522169	90583	DnaJ homolog subfamily C member 10 OS=Mus musculus OX=10090 GN=Dnajc10 PE=1 SV=2
569	TRUE	Q3UHB8|CC177_MOUSE	7.34	10.06	6	6		609.613	823.957	579.967	671.179	332.228	578.803	554.256	488.429	0.727718	0.1714	79857	Coiled-coil domain-containing protein 177 OS=Mus musculus OX=10090 GN=Ccdc177 PE=1 SV=1
3017	FALSE	Q99LU0|CH1B1_MOUSE	1.34	4.52	1	1		241.705	152.949	166.413	187.023	1015.34	118.308	114.265	415.972	2.22418	0.489189	22124	Charged multivesicular body protein 1B1 OS=Mus musculus OX=10090 GN=Chmp1b1 PE=1 SV=1
2917	TRUE	Q56A07|SCN2B_MOUSE	11.75	7.44	2	2		1254.57	1365.38	1137.85	1252.6	1374.34	1517.67	1466.96	1452.99	1.15998	0.0619221	24228	Sodium channel subunit beta-2 OS=Mus musculus OX=10090 GN=Scn2b PE=1 SV=1
3823	TRUE	Q91VN0|LRP5_MOUSE	43.81	0.56	1	1	N-ethylmaleimide on cysteines	3185.43	3368.37	3147.47	3233.75	751.041	914.1	912.593	859.245	0.265711	1.07412e-05	178885	Low-density lipoprotein receptor-related protein 5 OS=Mus musculus OX=10090 GN=Lrp5 PE=1 SV=3
1039	TRUE	Q7TQD2|TPPP_MOUSE	48.81	36.24	6	6		29112.1	29748.4	31151.1	30003.9	10702.4	11445.5	11933.6	11360.5	0.378635	1.18568e-05	23575	Tubulin polymerization-promoting protein OS=Mus musculus OX=10090 GN=Tppp PE=1 SV=1
1155	TRUE	Q9QZD9|EIF3I_MOUSE	18.06	16.92	5	5		969.509	869.703	997.47	945.56	314.8	340.963	607.118	420.96	0.445197	0.00656962	36461	Eukaryotic translation initiation factor 3 subunit I OS=Mus musculus OX=10090 GN=Eif3i PE=1 SV=1
1808	TRUE	Q9Z2T6|KRT85_MOUSE	26.91	1.97	5	1		236.356	160.642	181.384	192.794	70.0656	73.665	85.3114	76.3474	0.396005	0.00722469	55759	Keratin, type II cuticular Hb5 OS=Mus musculus OX=10090 GN=Krt85 PE=1 SV=2
3843	TRUE	Q9D8B4|NDUAB_MOUSE	44.92	7.8	1	1		2261.34	2579.89	2220.45	2353.89	725.896	657.189	729.737	704.274	0.299196	0.000142147	14982	NADH dehydrogenase [ubiquinone] 1 alpha subcomplex subunit 11 OS=Mus musculus OX=10090 GN=Ndufa11 PE=1 SV=2
1929	TRUE	O09167|RL21_MOUSE	56.51	30	5	5		6900.29	6990.36	6695.07	6861.91	3019.77	3112.72	3178.55	3103.68	0.452306	2.84954e-06	18579	60S ribosomal protein L21 OS=Mus musculus OX=10090 GN=Rpl21 PE=1 SV=4
2850	TRUE	Q99P31|HPBP1_MOUSE	7.78	5.88	2	2		240.483	297.277	231.094	256.285	80.5308	111.827	274.817	155.725	0.607625	0.189435	39167	Hsp70-binding protein 1 OS=Mus musculus OX=10090 GN=Hspbp1 PE=1 SV=1
2032	TRUE	Q8JZN7|MIRO2_MOUSE	0.28	1.77	3	1		181.11	129.449	69.2219	126.594	101.67	95.9432	153.659	117.091	0.924935	0.810872	69071	Mitochondrial Rho GTPase 2 OS=Mus musculus OX=10090 GN=Rhot2 PE=1 SV=1
1410	TRUE	Q8CGM1|AGRB2_MOUSE	20.72	2.05	4	3		1329.97	1496.75	1378.52	1401.74	600.527	876.276	846.243	774.349	0.552418	0.00334415	169863	Adhesion G protein-coupled receptor B2 OS=Mus musculus OX=10090 GN=Adgrb2 PE=1 SV=2
1815	TRUE	Q8BFP9|PDK1_MOUSE	16.23	5.07	3	2		481.371	469.178	569.864	506.804	289.112	142.475	265.926	232.504	0.458765	0.00779204	48995	[Pyruvate dehydrogenase (acetyl-transferring)] kinase isozyme 1, mitochondrial OS=Mus musculus OX=10090 GN=Pdk1 PE=1 SV=2
2845	TRUE	Q9CXW4|RL11_MOUSE	28.52	12.92	2	2		2011.8	1986.24	1926.79	1974.94	1058.38	1072.46	816.708	982.515	0.497491	0.000332978	20252	60S ribosomal protein L11 OS=Mus musculus OX=10090 GN=Rpl11 PE=1 SV=4
226	TRUE	Q9JI91|ACTN2_MOUSE	22.65	14.65	22	11		2649.87	2455.98	2312.46	2472.77	1350.01	1705.98	1256.1	1437.36	0.581277	0.00354298	103834	Alpha-actinin-2 OS=Mus musculus OX=10090 GN=Actn2 PE=1 SV=2
3185	TRUE	Q99PW8|KIF17_MOUSE	30.63	1.64	1	1		3216.77	3081.86	3031.92	3110.18	354.894	661.85	620.311	545.685	0.175451	2.07011e-05	116373	Kinesin-like protein KIF17 OS=Mus musculus OX=10090 GN=Kif17 PE=1 SV=1
1095	TRUE	Q64133|AOFA_MOUSE	24.46	15.78	8	7		1786.85	1718.32	2059.57	1854.91	751.309	987.738	1037.4	925.483	0.498936	0.00243594	59602	Amine oxidase [flavin-containing] A OS=Mus musculus OX=10090 GN=Maoa PE=1 SV=3
1714	TRUE	Q3TCH7|CUL4A_MOUSE	22.11	1.45	3	1		139.66	238.691	300.492	226.281	53.2652	66.6326	40.9916	53.6298	0.237005	0.0219509	87753	Cullin-4A OS=Mus musculus OX=10090 GN=Cul4a PE=1 SV=1
45	TRUE	P28660|NCKP1_MOUSE	40.53	33.24	41	41	Oxidation (M)	11428.5	10988.2	11348.2	11255	8906.32	8948.6	8696.43	8850.45	0.78636	0.000103987	128784	Nck-associated protein 1 OS=Mus musculus OX=10090 GN=Nckap1 PE=1 SV=2
2617	FALSE	O88811|STAM2_MOUSE	9.32	1.91	1	1		386.254	352.806	274.096	337.719	325.08	115.834	109.973	183.629	0.543733	0.119993	57455	Signal transducing adapter molecule 2 OS=Mus musculus OX=10090 GN=Stam2 PE=1 SV=1
999	TRUE	Q8BW75|AOFB_MOUSE	23.11	11.35	5	5		1184.07	1147.34	1163.48	1164.96	577.648	677.353	803.174	686.058	0.58891	0.00192734	58558	Amine oxidase [flavin-containing] B OS=Mus musculus OX=10090 GN=Maob PE=1 SV=4
755	TRUE	Q7SIG6|ASAP2_MOUSE	36.04	7.72	7	6		169019	177173	181972	176055	131033	131819	134567	132473	0.752454	0.000375919	106805	Arf-GAP with SH3 domain, ANK repeat and PH domain-containing protein 2 OS=Mus musculus OX=10090 GN=Asap2 PE=1 SV=3
310	TRUE	Q9Z218|DPP6_MOUSE	40.06	24.63	18	16		4765.31	5107.19	4898.96	4923.82	2159.23	2007.83	2372.65	2179.9	0.442726	4.6228e-05	91260	Dipeptidyl aminopeptidase-like protein 6 OS=Mus musculus OX=10090 GN=Dpp6 PE=1 SV=1
1204	TRUE	Q60625|ICAM5_MOUSE	38.75	7.2	7	7		7172.24	6733.23	6756.62	6887.36	3557.72	3897.81	3997.42	3817.65	0.554298	9.52629e-05	96946	Intercellular adhesion molecule 5 OS=Mus musculus OX=10090 GN=Icam5 PE=1 SV=2
886	TRUE	Q9D8Y0|EFHD2_MOUSE	26.12	39.17	10	10		5125.08	4927.37	4970.93	5007.8	936.023	1836.55	1359	1377.19	0.275009	0.000169206	26791	EF-hand domain-containing protein D2 OS=Mus musculus OX=10090 GN=Efhd2 PE=1 SV=1
3655	TRUE	Q3UGC7|EI3JA_MOUSE	4.89	4.21	1	1		118.803	131.783	141.38	130.655	127.119	41.2824	121.023	96.475	0.738394	0.295358	29344	Eukaryotic translation initiation factor 3 subunit J-A OS=Mus musculus OX=10090 GN=Eif3j1 PE=2 SV=1
236	TRUE	Q9QXL2|KI21A_MOUSE	26.96	9.03	14	11		2446.13	2268.84	2461.93	2392.3	1623.99	1761.02	1494.68	1626.56	0.679916	0.00148823	186536	Kinesin-like protein KIF21A OS=Mus musculus OX=10090 GN=Kif21a PE=1 SV=2
911	TRUE	Q99MN1|SYK_MOUSE	39.44	13.11	9	9		4150.8	3624.05	3697.41	3824.09	1563.79	1464.97	1689.59	1572.78	0.411284	0.000220515	67840	Lysine--tRNA ligase OS=Mus musculus OX=10090 GN=Kars1 PE=1 SV=1
1302	TRUE	Q8BLR2|CPNE4_MOUSE	16.53	14.54	8	7		877.029	1000.98	806.275	894.763	656.743	606.71	727.613	663.689	0.741748	0.0258904	62408	Copine-4 OS=Mus musculus OX=10090 GN=Cpne4 PE=1 SV=1
1233	TRUE	Q9Z0V2|KCND2_MOUSE	6.98	9.21	6	5		1045.95	937.14	863.84	948.978	1061.91	985.124	1378.27	1141.77	1.20315	0.216303	70577	Potassium voltage-gated channel subfamily D member 2 OS=Mus musculus OX=10090 GN=Kcnd2 PE=1 SV=1
863	TRUE	Q60675|LAMA2_MOUSE	2.59	1.06	3	3		378.178	613.14	402.67	464.663	458.475	540.79	514.17	504.478	1.08569	0.63836	343815	Laminin subunit alpha-2 OS=Mus musculus OX=10090 GN=Lama2 PE=1 SV=2
1886	TRUE	O35857|TIM44_MOUSE	11.06	5.97	2	2		91.3049	172.211	98.911	120.809	62.6984	75.6656	75.123	71.1623	0.589049	0.130349	51091	Mitochondrial import inner membrane translocase subunit TIM44 OS=Mus musculus OX=10090 GN=Timm44 PE=1 SV=2
2037	TRUE	Q00915|RET1_MOUSE	41.95	40.74	5	5		1428.23	1356.46	1374.37	1386.35	334.077	343.519	423.748	367.115	0.264806	8.95442e-06	15846	Retinol-binding protein 1 OS=Mus musculus OX=10090 GN=Rbp1 PE=1 SV=2
1487	TRUE	Q8JZR6|S4A8_MOUSE	7.63	1.56	5	2		917.682	800.549	892.429	870.22	883.375	644.463	679.964	735.934	0.845687	0.17892	122421	Electroneutral sodium bicarbonate exchanger 1 OS=Mus musculus OX=10090 GN=Slc4a8 PE=1 SV=1
2276	TRUE	Q8BGX2|TIM29_MOUSE	21.61	10.15	3	3		1007.7	1003.86	774.933	928.832	380.62	367.371	542.989	430.327	0.463299	0.00641511	29415	Mitochondrial import inner membrane translocase subunit Tim29 OS=Mus musculus OX=10090 GN=Timm29 PE=1 SV=1
2390	TRUE	P02301|H3C_MOUSE	31	16.91	3	3		89763.8	89018.6	81256.2	86679.5	56045.4	52252.1	47817.9	52038.5	0.600355	0.000661118	15315	Histone H3.3C OS=Mus musculus OX=10090 GN=H3-5 PE=3 SV=3
174	TRUE	P60710|ACTB_MOUSE	52.44	16.8	19	5	Oxidation (M)	943376	889814	890210	907800	460417	472523	464507	465816	0.513126	1.68356e-05	41737	Actin, cytoplasmic 1 OS=Mus musculus OX=10090 GN=Actb PE=1 SV=1
1905	TRUE	Q9CQE8|RTRAF_MOUSE	28.7	17.62	4	4		1062.81	966.187	974.344	1001.11	410.194	534.509	524.551	489.751	0.489206	0.000534391	28152	RNA transcription, translation and transport factor protein OS=Mus musculus OX=10090 GN=RTRAF PE=1 SV=1
562	TRUE	Q3UHL1|CAMKV_MOUSE	0.64	26.95	11	11		27039.4	10747.2	11032.2	16272.9	13058.7	23204.1	8369.1	14877.3	0.914238	0.850419	54819	CaM kinase-like vesicle-associated protein OS=Mus musculus OX=10090 GN=Camkv PE=1 SV=2
2654	FALSE	Q60817|NACA_MOUSE	23.34	6.51	1	1		387.452	424.515	247.102	353.023	78.6985	120.52	111.822	103.68	0.293693	0.0108918	23384	Nascent polypeptide-associated complex subunit alpha OS=Mus musculus OX=10090 GN=Naca PE=1 SV=1
1666	TRUE	Q71M36|CSPG5_MOUSE	14.17	5.48	3	3	Oxidation (M)	471.38	494.106	429.858	465.115	269.232	288.202	399.455	318.963	0.685773	0.0309295	60406	Chondroitin sulfate proteoglycan 5 OS=Mus musculus OX=10090 GN=Cspg5 PE=1 SV=2
2735	TRUE	Q8K0C9|GMDS_MOUSE	12.41	3.23	1	1		336.346	341.443	234.439	304.076	158.323	213.709	220.382	197.471	0.649415	0.0561566	41985	GDP-mannose 4,6 dehydratase OS=Mus musculus OX=10090 GN=Gmds PE=1 SV=1
1568	TRUE	Q8R2R9|AP3M2_MOUSE	28.67	6.94	4	2		1077.6	1148.41	1213.22	1146.41	687.495	762.991	635.282	695.256	0.606465	0.00111633	46916	AP-3 complex subunit mu-2 OS=Mus musculus OX=10090 GN=Ap3m2 PE=1 SV=1
1394	TRUE	Q61187|TS101_MOUSE	7.18	8.18	3	3		392.781	387.572	501.902	427.418	224.858	259.876	449.065	311.266	0.728248	0.215362	44124	Tumor susceptibility gene 101 protein OS=Mus musculus OX=10090 GN=Tsg101 PE=1 SV=2
2936	TRUE	Q61249|IGBP1_MOUSE	23.31	4.41	1	1		228.487	183.359	176.399	196.082	91.6147	110.161	115.916	105.897	0.540067	0.00728779	38971	Immunoglobulin-binding protein 1 OS=Mus musculus OX=10090 GN=Igbp1 PE=1 SV=1
1162	TRUE	Q2NL51|GSK3A_MOUSE	0.44	8.37	6	4		1217.97	1246.64	1683.97	1382.86	3182.21	1161.87	812.985	1719.02	1.24309	0.678677	51661	Glycogen synthase kinase-3 alpha OS=Mus musculus OX=10090 GN=Gsk3a PE=1 SV=2
1676	FALSE	Q60973|RBBP7_MOUSE	29.47	7.06	3	3		1164.63	1637.2	1588.28	1463.37	418.854	378.757	521.15	439.587	0.300394	0.00278279	47790	Histone-binding protein RBBP7 OS=Mus musculus OX=10090 GN=Rbbp7 PE=1 SV=1
2254	TRUE	Q9WTR5|CAD13_MOUSE	32.52	6.16	3	3		1083.4	844.575	1111.9	1013.29	343.793	402.799	376.299	374.297	0.369386	0.00178728	78186	Cadherin-13 OS=Mus musculus OX=10090 GN=Cdh13 PE=1 SV=2
722	TRUE	Q6PGN3|DCLK2_MOUSE	15.45	14.55	11	10		5128.6	5797.39	5064.18	5330.06	3568.66	3983.6	4570.39	4040.88	0.758131	0.0259827	82979	Serine/threonine-protein kinase DCLK2 OS=Mus musculus OX=10090 GN=Dclk2 PE=1 SV=1
1255	TRUE	Q9CZY3|UB2V1_MOUSE	44.2	27.21	8	4	Acetylation (Protein N-term)	3231.2	2965.7	2910.32	3035.74	1071.65	924.706	936.127	977.496	0.321996	4.75152e-05	16355	Ubiquitin-conjugating enzyme E2 variant 1 OS=Mus musculus OX=10090 GN=Ube2v1 PE=1 SV=1
1843	TRUE	Q8CCT4|TCAL5_MOUSE	31.6	25	5	5		3073.43	3323.22	3085.33	3160.66	989.131	1206.04	794.373	996.514	0.315287	0.000114421	22038	Transcription elongation factor A protein-like 5 OS=Mus musculus OX=10090 GN=Tceal5 PE=1 SV=1
759	TRUE	O70456|1433S_MOUSE	55.97	16.53	9	5	Oxidation (M)	1883.67	1824.58	1770.8	1826.35	231.129	249.722	210.246	230.365	0.126134	1.31085e-06	27706	14-3-3 protein sigma OS=Mus musculus OX=10090 GN=Sfn PE=1 SV=2
681	TRUE	Q8BJH1|ZC21A_MOUSE	39.56	50	14	14		9304.55	9362.73	8253.92	8973.74	4565.83	4264.43	4520.94	4450.4	0.495936	0.000263425	35152	Zinc finger C2HC domain-containing protein 1A OS=Mus musculus OX=10090 GN=Zc2hc1a PE=1 SV=1
2419	TRUE	A2ARP1|VIP1_MOUSE	3.11	2.09	2	2		274.026	306.774	160.281	247.027	174.669	146.649	279.139	200.152	0.810245	0.478068	159923	Inositol hexakisphosphate and diphosphoinositol-pentakisphosphate kinase 1 OS=Mus musculus OX=10090 GN=Ppip5k1 PE=1 SV=1
447	TRUE	Q9D394|RUFY3_MOUSE	32.79	32.62	17	16		4503.4	4157.19	3918.95	4193.18	1176.98	1610.29	1537.62	1441.63	0.343804	0.000219558	53007	Protein RUFY3 OS=Mus musculus OX=10090 GN=Rufy3 PE=1 SV=1
958	TRUE	Q61035|HARS1_MOUSE	22.07	10.02	8	5		1784.57	1632.48	1561.47	1659.51	451.878	820.726	692.238	654.947	0.394664	0.00136369	57432	Histidine--tRNA ligase, cytoplasmic OS=Mus musculus OX=10090 GN=Hars1 PE=1 SV=2
1923	TRUE	Q9Z110|P5CS_MOUSE	3.19	1.01	1	1		88.8257	94.4929	49.5734	77.6307	63.9583	60.24	66.4852	63.5612	0.818764	0.379063	87266	Delta-1-pyrroline-5-carboxylate synthase OS=Mus musculus OX=10090 GN=Aldh18a1 PE=1 SV=2
3606	TRUE	Q9EQQ2|YIPF5_MOUSE	3.8	3.5	1	1		262.934	257.381	230.536	250.284	246.163	96.0938	268.174	203.477	0.812986	0.442578	27873	Protein YIPF5 OS=Mus musculus OX=10090 GN=Yipf5 PE=1 SV=1
2552	FALSE	Q5FWH2|UNKL_MOUSE	15.46	1.51	1	1		133.507	128.419	139.135	133.687	95.3166	56.2037	86.0257	79.182	0.592293	0.011086	79636	Putative E3 ubiquitin-protein ligase UNKL OS=Mus musculus OX=10090 GN=Unkl PE=2 SV=2
2575	TRUE	P14115|RL27A_MOUSE	45.39	19.59	3	3		11526.2	11169.4	11122.3	11272.6	7874.91	8154.29	7864.58	7964.59	0.706542	3.15045e-05	16605	60S ribosomal protein L27a OS=Mus musculus OX=10090 GN=Rpl27a PE=1 SV=5
1559	TRUE	Q9JKR6|HYOU1_MOUSE	3.29	1.5	2	2		288.081	215.638	209.016	237.579	222.579	60.2219	293.036	191.945	0.807924	0.567993	111181	Hypoxia up-regulated protein 1 OS=Mus musculus OX=10090 GN=Hyou1 PE=1 SV=1
2500	TRUE	Q9WVL0|MAAI_MOUSE	15.33	5.09	1	1		130.867	266.676	114.409	170.651	59.865	70.104	66.6332	65.5341	0.384025	0.0953303	24275	Maleylacetoacetate isomerase OS=Mus musculus OX=10090 GN=Gstz1 PE=1 SV=1
1902	TRUE	Q9DAW9|CNN3_MOUSE	8.88	6.67	2	2		419.309	361.16	262.085	347.518	259.424	275.508	245.965	260.299	0.749023	0.135098	36429	Calponin-3 OS=Mus musculus OX=10090 GN=Cnn3 PE=1 SV=1
65	TRUE	P50516|VATA_MOUSE	58.91	52.03	30	30	Oxidation (M)	82488.2	85206	84921.8	84205.3	45262.8	46535.6	45743.6	45847.4	0.544471	2.14516e-06	68326	V-type proton ATPase catalytic subunit A OS=Mus musculus OX=10090 GN=Atp6v1a PE=1 SV=2
909	TRUE	P26041|MOES_MOUSE	7.22	1.39	8	1		156.315	152.993	190.907	166.738	125.719	125.218	166.32	139.086	0.834157	0.203934	67767	Moesin OS=Mus musculus OX=10090 GN=Msn PE=1 SV=3
452	TRUE	Q9JIF7|COPB_MOUSE	23.03	10.81	9	9		1594.95	1925.91	1672.47	1731.11	795.075	988.424	1079.52	954.339	0.551287	0.00399369	107066	Coatomer subunit beta OS=Mus musculus OX=10090 GN=Copb1 PE=1 SV=1
2888	TRUE	Q64520|KGUA_MOUSE	7.24	8.59	1	1		228.897	160.239	78.7224	155.953	85.394	92.0226	82.1953	86.5373	0.554894	0.185783	21918	Guanylate kinase OS=Mus musculus OX=10090 GN=Guk1 PE=1 SV=2
1280	TRUE	Q8C008|DZAN1_MOUSE	16.29	3.98	2	2		209.468	175.929	259.779	215.059	88.3107	145.321	102.189	111.94	0.520512	0.0258236	85025	Double zinc ribbon and ankyrin repeat-containing protein 1 OS=Mus musculus OX=10090 GN=Dzank1 PE=1 SV=2
648	TRUE	O88532|ZFR_MOUSE	9.43	15.64	13	13		1467.81	1459.19	1836.99	1588	1446.23	1268.06	1258.49	1324.26	0.833918	0.129977	116859	Zinc finger RNA-binding protein OS=Mus musculus OX=10090 GN=Zfr PE=1 SV=2
71	TRUE	Q5DU25|IQEC2_MOUSE	2.58	24.76	34	31	Acetylation (Protein N-term)	3522.76	5307.66	4797.27	4542.56	4332.41	4506.3	3436.72	4091.81	0.900773	0.511144	161787	IQ motif and SEC7 domain-containing protein 2 OS=Mus musculus OX=10090 GN=Iqsec2 PE=1 SV=3
2227	TRUE	Q922P8|T132A_MOUSE	20.34	2.75	2	2		615.219	730.506	695.456	680.394	399.249	452.078	310.55	387.293	0.569218	0.00542761	110239	Transmembrane protein 132A OS=Mus musculus OX=10090 GN=Tmem132a PE=1 SV=2
1557	TRUE	Q5XJY5|COPD_MOUSE	3.16	7.63	4	4		649.116	723.701	557.559	643.459	523.076	4749.94	566.878	1946.63	3.02526	0.405403	57229	Coatomer subunit delta OS=Mus musculus OX=10090 GN=Arcn1 PE=1 SV=2
2052	TRUE	Q91YE6|IPO9_MOUSE	11.93	2.98	3	3		252.026	253.435	296.18	267.214	200.142	241.76	219.186	220.363	0.824669	0.0676321	116052	Importin-9 OS=Mus musculus OX=10090 GN=Ipo9 PE=1 SV=3
1508	TRUE	P84096|RHOG_MOUSE	14.4	19.37	4	3		1254.69	1226.68	1424.17	1301.84	462.048	719.334	202.116	461.166	0.354241	0.00649949	21308	Rho-related GTP-binding protein RhoG OS=Mus musculus OX=10090 GN=Rhog PE=1 SV=1
2758	TRUE	Q9D2G5|SYNJ2_MOUSE	42.37	0.56	2	1		1362.23	1570.78	1494.44	1475.82	121.848	77.6627	116.265	105.258	0.0713221	2.5561e-05	158480	Synaptojanin-2 OS=Mus musculus OX=10090 GN=Synj2 PE=1 SV=2
1960	TRUE	Q6P5E8|DGKQ_MOUSE	3.09	0.86	1	1		124.751	128.657	131.861	128.423	97.9421	136.627	125.661	120.077	0.935009	0.514801	102254	Diacylglycerol kinase theta OS=Mus musculus OX=10090 GN=Dgkq PE=1 SV=1
1952	TRUE	Q9DCP2|S38A3_MOUSE	0.36	9.7	5	5		1179.96	1258.36	1279.85	1239.39	1626.72	1330.47	823.379	1260.19	1.01678	0.934153	55592	Sodium-coupled neutral amino acid transporter 3 OS=Mus musculus OX=10090 GN=Slc38a3 PE=1 SV=1
1752	TRUE	P62743|AP2S1_MOUSE	31.71	44.37	6	6	Oxidation (M)	24387.9	23666.1	23673	23909	17279.5	15950.5	15025.1	16085	0.67276	0.000358082	17018	AP-2 complex subunit sigma OS=Mus musculus OX=10090 GN=Ap2s1 PE=1 SV=1
1851	TRUE	Q9QXB9|DRG2_MOUSE	18.3	6.04	2	2		788.644	743.521	629.385	720.517	225.897	227.792	435.265	296.318	0.411258	0.00726163	40718	Developmentally-regulated GTP-binding protein 2 OS=Mus musculus OX=10090 GN=Drg2 PE=1 SV=1
2857	TRUE	P39876|TIMP3_MOUSE	35.71	5.21	1	1		1933.21	2080.52	2012.89	2008.87	716.244	858.71	904.489	826.481	0.411416	7.56948e-05	24182	Metalloproteinase inhibitor 3 OS=Mus musculus OX=10090 GN=Timp3 PE=1 SV=1
1227	TRUE	Q01768|NDKB_MOUSE	40.54	20.39	7	3		5485.35	4396.24	5085.88	4989.16	1697.16	1675.8	1757.77	1710.24	0.342792	0.000505485	17363	Nucleoside diphosphate kinase B OS=Mus musculus OX=10090 GN=Nme2 PE=1 SV=1
670	TRUE	Q9CR16|PPID_MOUSE	50.75	33.24	13	13	Acetylation (Protein N-term)	5500.08	5609.89	5563.86	5557.94	2135.53	2301.84	2363.81	2267.06	0.407896	1.63248e-06	40743	Peptidyl-prolyl cis-trans isomerase D OS=Mus musculus OX=10090 GN=Ppid PE=1 SV=3
1269	TRUE	O70325|GPX4_MOUSE	14.02	26.4	6	6	Oxidation (M)	8356.76	7721.84	7781.74	7953.44	8456.82	9017.82	8729.39	8734.68	1.09823	0.0394063	22198	Phospholipid hydroperoxide glutathione peroxidase OS=Mus musculus OX=10090 GN=Gpx4 PE=1 SV=4
1132	TRUE	Q922J3|CLIP1_MOUSE	12.16	2.66	5	3		487.93	722.071	533.392	581.131	338.835	370	463.804	390.88	0.672618	0.0784303	155814	CAP-Gly domain-containing linker protein 1 OS=Mus musculus OX=10090 GN=Clip1 PE=1 SV=1
928	TRUE	Q3UU96|MRCKA_MOUSE	0.65	3.55	7	5		304.793	472.054	343.648	373.498	409.573	297.381	448.939	385.298	1.03159	0.870554	195536	Serine/threonine-protein kinase MRCK alpha OS=Mus musculus OX=10090 GN=Cdc42bpa PE=1 SV=2
485	TRUE	Q8CGK3|LONM_MOUSE	23.45	13.59	12	12		1464.55	1460.75	1509.24	1478.18	508.574	558.351	832.285	633.07	0.428277	0.00115128	105843	Lon protease homolog, mitochondrial OS=Mus musculus OX=10090 GN=Lonp1 PE=1 SV=2
531	TRUE	Q9D051|ODPB_MOUSE	78.91	35.93	11	11	Oxidation (M)	35728.7	35687.8	35524.8	35647.1	17880.3	17985.8	17717.9	17861.3	0.50106	5.93107e-09	38937	Pyruvate dehydrogenase E1 component subunit beta, mitochondrial OS=Mus musculus OX=10090 GN=Pdhb PE=1 SV=1
322	TRUE	E9Q912|GDS1_MOUSE	61.93	34.43	19	19	Acetylation (Protein N-term); Oxidation (M)	13286.5	12984.1	12876.1	13048.9	7362.64	7351.15	7256.53	7323.44	0.56123	1.46352e-06	66076	Rap1 GTPase-GDP dissociation stimulator 1 OS=Mus musculus OX=10090 GN=Rap1gds1 PE=2 SV=1
2230	TRUE	P53811|PIPNB_MOUSE	8.74	4.43	2	1		152.617	217.275	186.178	185.356	159.691	117.576	150.502	142.59	0.769273	0.131751	31487	Phosphatidylinositol transfer protein beta isoform OS=Mus musculus OX=10090 GN=Pitpnb PE=1 SV=2
1336	TRUE	Q8R001|MARE2_MOUSE	16.63	13.8	5	4		1708.17	2426.96	2267.88	2134.34	700.142	1048.78	1291.11	1013.34	0.474781	0.0155834	36946	Microtubule-associated protein RP/EB family member 2 OS=Mus musculus OX=10090 GN=Mapre2 PE=1 SV=1
1421	FALSE	Q63811|CANB2_MOUSE	35.69	4.47	1	1		7615.54	7748.84	7949.93	7771.44	2975.65	2975.86	2301.47	2750.99	0.353988	3.34274e-05	20659	Calcineurin subunit B type 2 OS=Mus musculus OX=10090 GN=Ppp3r2 PE=1 SV=3
1292	TRUE	A2ALU4|SHRM2_MOUSE	6.89	3.17	4	4		558.323	392.166	621.983	524.157	387.281	425.468	431.141	414.63	0.791041	0.192084	164703	Protein Shroom2 OS=Mus musculus OX=10090 GN=Shroom2 PE=1 SV=1
1125	TRUE	Q07113|MPRI_MOUSE	9.36	2.22	5	5		542.797	442.824	429.503	471.708	507.834	615.004	576.196	566.345	1.20063	0.117333	273815	Cation-independent mannose-6-phosphate receptor OS=Mus musculus OX=10090 GN=Igf2r PE=1 SV=1
970	TRUE	Q8R050|ERF3A_MOUSE	9.34	15.25	9	9		1324.36	1606.72	1449.74	1460.27	954.109	522.232	1259.04	911.793	0.624399	0.074602	68625	Eukaryotic peptide chain release factor GTP-binding subunit ERF3A OS=Mus musculus OX=10090 GN=Gspt1 PE=1 SV=2
247	TRUE	Q60875|ARHG2_MOUSE	18.73	18.27	17	17		1697.29	2187.63	2284.94	2056.62	1411.36	1182.81	1323.5	1305.89	0.634968	0.0178902	111974	Rho guanine nucleotide exchange factor 2 OS=Mus musculus OX=10090 GN=Arhgef2 PE=1 SV=4
1354	FALSE	P02104|HBE_MOUSE	33.84	6.8	1	1		8329.88	8655.25	7917.34	8300.82	5968.51	6227	6044.5	6080.01	0.732458	0.000610351	16137	Hemoglobin subunit epsilon-Y2 OS=Mus musculus OX=10090 GN=Hbb-y PE=1 SV=2
1688	TRUE	P84099|RL19_MOUSE	19.29	29.59	6	6		6614.57	8146.87	7492.68	7418.04	4650.18	5417.92	5509.09	5192.4	0.699969	0.0129151	23466	60S ribosomal protein L19 OS=Mus musculus OX=10090 GN=Rpl19 PE=1 SV=1
948	TRUE	P28867|KPCD_MOUSE	34.07	13.8	9	9	Oxidation (M); acrylamide	3350.57	3411.95	3556.8	3439.77	1388.35	1766.97	1515.83	1557.05	0.45266	0.000120242	77547	Protein kinase C delta type OS=Mus musculus OX=10090 GN=Prkcd PE=1 SV=3
568	TRUE	Q9JIS5|SV2A_MOUSE	52.92	16.17	11	11	Oxidation (M)	24892.2	24899.4	25620.5	25137.3	18301	18299.8	18356.9	18319.2	0.728765	9.49096e-06	82647	Synaptic vesicle glycoprotein 2A OS=Mus musculus OX=10090 GN=Sv2a PE=1 SV=1
53	TRUE	Q7TPR4|ACTN1_MOUSE	34.93	32.06	40	24	Oxidation (M)	14347.9	15814.5	16386.2	15516.2	8812.99	9449.6	8708.46	8990.35	0.579417	0.00055243	103068	Alpha-actinin-1 OS=Mus musculus OX=10090 GN=Actn1 PE=1 SV=1
1918	TRUE	P17809|GTR1_MOUSE	12.5	5.49	3	3		3733.65	3880.42	3490.55	3701.54	2729.37	3193.93	3345.21	3089.51	0.834654	0.048048	53985	Solute carrier family 2, facilitated glucose transporter member 1 OS=Mus musculus OX=10090 GN=Slc2a1 PE=1 SV=4
723	TRUE	Q9R0Q6|ARC1A_MOUSE	55.13	39.19	13	13		27698.7	27682.8	27471.6	27617.7	13249.1	14128.5	13592.8	13656.8	0.494493	7.90433e-07	41626	Actin-related protein 2/3 complex subunit 1A OS=Mus musculus OX=10090 GN=Arpc1a PE=1 SV=1
929	TRUE	Q6NVF0|OCRL_MOUSE	9.66	8.44	7	7		1059.32	897.297	1004.41	987.009	880.892	554.311	784.888	740.03	0.749771	0.0840613	104285	Inositol polyphosphate 5-phosphatase OCRL OS=Mus musculus OX=10090 GN=Ocrl PE=1 SV=1
1857	TRUE	Q8BPM0|DAAM1_MOUSE	3.45	0.93	1	1		78.8326	91.8649	96.7943	89.1639	81.8889	103.145	108.057	97.6969	1.0957	0.426669	123370	Disheveled-associated activator of morphogenesis 1 OS=Mus musculus OX=10090 GN=Daam1 PE=1 SV=4
261	TRUE	P17183|ENOG_MOUSE	43.93	46.54	16	14	Oxidation (M)	51884.4	54111.1	57596.7	54530.7	28430.4	29055.1	29529.4	29005	0.531901	0.000112642	47297	Gamma-enolase OS=Mus musculus OX=10090 GN=Eno2 PE=1 SV=2
92	FALSE	P31254|UBA1Y_MOUSE	22.89	5.77	7	7		18530.6	18429.1	18485.2	18481.7	12431.4	14248.7	14787.7	13822.6	0.747908	0.00283938	118038	Ubiquitin-like modifier-activating enzyme 1 Y OS=Mus musculus OX=10090 GN=Uba1y PE=1 SV=2
1736	TRUE	Q924M7|MPI_MOUSE	29.07	13.24	5	5		2066.71	2218.01	2481.02	2255.25	1265.99	1024.6	1029.21	1106.6	0.490678	0.00137167	46575	Mannose-6-phosphate isomerase OS=Mus musculus OX=10090 GN=Mpi PE=1 SV=1
2805	TRUE	Q6ZWV7|RL35_MOUSE	24.41	15.45	2	2		1788.44	1804.62	1697.31	1763.46	977.703	624.275	806.951	802.976	0.455342	0.000863827	14553	60S ribosomal protein L35 OS=Mus musculus OX=10090 GN=Rpl35 PE=1 SV=1
148	TRUE	Q6IFX2|K1C42_MOUSE	86.99	11.28	23	6		96376.5	95187.9	95824.5	95796.3	18474.9	18845.7	18559.9	18626.8	0.194442	2.88067e-09	50133	Keratin, type I cytoskeletal 42 OS=Mus musculus OX=10090 GN=Krt42 PE=1 SV=1
3060	TRUE	Q3UI43|BABA1_MOUSE	4.8	6.01	2	2		7051.23	5870.46	206.826	4376.17	7769.22	6191.07	8078.65	7346.31	1.67871	0.246842	36793	BRISC and BRCA1-A complex member 1 OS=Mus musculus OX=10090 GN=Babam1 PE=1 SV=1
1548	TRUE	Q6ZQK5|ACAP2_MOUSE	7.3	7.66	5	5		547.721	373.689	541.632	487.681	361.013	432	367.513	386.842	0.793227	0.175641	87211	Arf-GAP with coiled-coil, ANK repeat and PH domain-containing protein 2 OS=Mus musculus OX=10090 GN=Acap2 PE=1 SV=2
434	TRUE	P16054|KPCE_MOUSE	37.97	21.44	15	15		6649.57	7008.23	7284.98	6980.93	4255.53	4529.91	4496.07	4427.17	0.634181	0.000230705	83561	Protein kinase C epsilon type OS=Mus musculus OX=10090 GN=Prkce PE=1 SV=1
1286	TRUE	Q9WVA3|BUB3_MOUSE	5.95	15.34	5	5		1065.23	1357.01	722.104	1048.11	442.045	751.848	966.958	720.284	0.687219	0.241226	36955	Mitotic checkpoint protein BUB3 OS=Mus musculus OX=10090 GN=Bub3 PE=1 SV=2
377	TRUE	P28663|SNAB_MOUSE	73.86	42.28	15	12	Oxidation (M)	25188.5	24932.6	24861.3	24994.1	11182.1	11073.6	11311.6	11189.1	0.447669	3.51803e-08	33557	Beta-soluble NSF attachment protein OS=Mus musculus OX=10090 GN=Napb PE=1 SV=2
2980	TRUE	Q8N7N5|DCAF8_MOUSE	8.2	3.38	2	2		207.613	305.859	172.511	228.661	83.5181	146.363	188.425	139.435	0.609791	0.150239	66031	DDB1- and CUL4-associated factor 8 OS=Mus musculus OX=10090 GN=Dcaf8 PE=1 SV=1
519	TRUE	P62821|RAB1A_MOUSE	58.29	45.85	12	8	Acetylation (Protein N-term); Oxidation (M)	6397.3	6446.95	6102.35	6315.53	2889.84	2907.88	2912.84	2903.52	0.459743	5.93449e-06	22678	Ras-related protein Rab-1A OS=Mus musculus OX=10090 GN=Rab1A PE=1 SV=3
1592	TRUE	Q6PD03|2A5A_MOUSE	16.27	12.14	6	5		692.668	741.74	699.091	711.166	400.375	275.854	500.691	392.307	0.551638	0.00883153	56347	Serine/threonine-protein phosphatase 2A 56 kDa regulatory subunit alpha isoform OS=Mus musculus OX=10090 GN=Ppp2r5a PE=1 SV=1
2011	TRUE	Q61749|EI2BD_MOUSE	14.89	7.82	3	3		287.926	350.131	335.906	324.655	272.515	260.266	265.071	265.951	0.819182	0.0374704	57624	Translation initiation factor eIF-2B subunit delta OS=Mus musculus OX=10090 GN=Eif2b4 PE=1 SV=2
87	TRUE	Q80TE7|LRRC7_MOUSE	13.62	23.76	29	29		2544.89	3742.5	3713.72	3333.7	4475.56	5024.79	5043.36	4847.9	1.45421	0.0255617	166901	Leucine-rich repeat-containing protein 7 OS=Mus musculus OX=10090 GN=Lrrc7 PE=1 SV=2
2443	TRUE	Q9D2V7|CORO7_MOUSE	17.67	0.98	1	1		159.874	241.748	220.003	207.208	78.3957	92.49	126.853	99.2462	0.478968	0.0190822	100812	Coronin-7 OS=Mus musculus OX=10090 GN=Coro7 PE=1 SV=2
1788	TRUE	Q3U0M1|TPPC9_MOUSE	6.73	2.53	3	3		304.181	439.751	296.997	346.976	309.772	270.166	255.413	278.45	0.802505	0.236008	128232	Trafficking protein particle complex subunit 9 OS=Mus musculus OX=10090 GN=Trappc9 PE=1 SV=2
3257	TRUE	P52760|RIDA_MOUSE	18.18	7.41	1	1		502.379	529.192	353.833	461.802	106.645	237.122	147.714	163.827	0.354756	0.0111352	14255	2-iminobutanoate/2-iminopropanoate deaminase OS=Mus musculus OX=10090 GN=Rida PE=1 SV=3
1277	FALSE	P56546|CTBP2_MOUSE	26.22	1.8	1	1		3136.29	4010.51	3300.08	3482.29	1939.17	1963.83	1667.94	1856.98	0.533264	0.00464696	48957	C-terminal-binding protein 2 OS=Mus musculus OX=10090 GN=Ctbp2 PE=1 SV=2
1338	TRUE	P62717|RL18A_MOUSE	62.98	23.86	5	5	Oxidation (M)	11286.5	11424.3	11144.8	11285.2	6099.05	6112.12	5964.54	6058.57	0.53686	6.12257e-07	20732	60S ribosomal protein L18a OS=Mus musculus OX=10090 GN=Rpl18a PE=1 SV=1
3195	TRUE	Q9D3D9|ATPD_MOUSE	17.86	13.69	2	2		2923.43	2999.69	4389.67	3437.6	1331.37	2067.64	1336.66	1578.56	0.459203	0.0255657	17600	ATP synthase subunit delta, mitochondrial OS=Mus musculus OX=10090 GN=Atp5f1d PE=1 SV=1
1427	TRUE	Q5FWK3|RHG01_MOUSE	27.34	16.4	7	7		1311.55	1823.56	1569.79	1568.3	701.763	786.079	682.172	723.338	0.461224	0.00503033	50411	Rho GTPase-activating protein 1 OS=Mus musculus OX=10090 GN=Arhgap1 PE=1 SV=1
3832	TRUE	Q9WTK2|CDYL_MOUSE	7.04	2.53	1	1		81270.9	117089	156046	118135	94315.9	69339.3	86003.3	83219.5	0.704441	0.200533	65211	Chromodomain Y-like protein OS=Mus musculus OX=10090 GN=Cdyl PE=1 SV=1
1461	TRUE	O35326|SRSF5_MOUSE	3.94	17.84	5	4		420.892	395.677	525.134	447.234	340.065	498.875	331.711	390.217	0.872512	0.444509	30891	Serine/arginine-rich splicing factor 5 OS=Mus musculus OX=10090 GN=Srsf5 PE=1 SV=2
1057	TRUE	Q61481|PDE1A_MOUSE	25.25	12.66	7	6		2680.13	3179.18	3529.47	3129.59	1595.12	1443.17	1149.99	1396.1	0.446095	0.00341118	62347	Dual specificity calcium/calmodulin-dependent 3',5'-cyclic nucleotide phosphodiesterase 1A OS=Mus musculus OX=10090 GN=Pde1a PE=1 SV=3
41	FALSE	Q91W97|HKDC1_MOUSE	37.89	3.28	4	4	Oxidation (M)	43393.5	41654	41238.3	42095.3	32835.4	31774.5	31555.8	32055.2	0.761493	0.000199019	102259	Hexokinase HKDC1 OS=Mus musculus OX=10090 GN=Hkdc1 PE=2 SV=1
427	FALSE	Q6PHS9|CA2D2_MOUSE	25.98	0.61	1	1		436.544	494.534	413.304	448.127	219.269	155.481	215.158	196.636	0.438795	0.00137525	130385	Voltage-dependent calcium channel subunit alpha-2/delta-2 OS=Mus musculus OX=10090 GN=Cacna2d2 PE=1 SV=1
1142	TRUE	P42669|PURA_MOUSE	52.97	28.66	7	7		15079.3	15394.9	15276.3	15250.2	6339.13	6798.46	6840.69	6659.43	0.436679	1.28962e-06	34884	Transcriptional activator protein Pur-alpha OS=Mus musculus OX=10090 GN=Pura PE=1 SV=1
1987	TRUE	Q9D6J5|NDUB8_MOUSE	34.67	25.81	4	4		6056.27	7844.99	7643.38	7181.54	2007.56	2006.8	2449.43	2154.59	0.300018	0.00100464	21876	NADH dehydrogenase [ubiquinone] 1 beta subcomplex subunit 8, mitochondrial OS=Mus musculus OX=10090 GN=Ndufb8 PE=1 SV=1
1088	TRUE	Q9QY76|VAPB_MOUSE	30.09	34.16	9	8		3917.53	3619.92	4005.22	3847.56	1347.94	1888.48	1567.02	1601.15	0.416146	0.000327706	26946	Vesicle-associated membrane protein-associated protein B OS=Mus musculus OX=10090 GN=Vapb PE=1 SV=3
987	TRUE	P67778|PHB1_MOUSE	53.54	42.28	10	10		5060.2	5052.9	4862.11	4991.73	1874.19	2037.58	1937.11	1949.63	0.390571	2.91825e-06	29820	Prohibitin 1 OS=Mus musculus OX=10090 GN=Phb1 PE=1 SV=1
1628	TRUE	O35593|PSDE_MOUSE	22.11	17.1	5	5		2622.91	2928.7	3093.36	2881.66	1360.33	674.421	753.672	929.474	0.322548	0.00160591	34577	26S proteasome non-ATPase regulatory subunit 14 OS=Mus musculus OX=10090 GN=Psmd14 PE=1 SV=2
706	TRUE	P97772|GRM1_MOUSE	6.17	4.92	7	6		870.8	928.322	1314.38	1037.83	827.071	963.97	683.794	824.945	0.794873	0.256742	133212	Metabotropic glutamate receptor 1 OS=Mus musculus OX=10090 GN=Grm1 PE=1 SV=2
47	TRUE	Q9QWL7|K1C17_MOUSE	72.17	25.87	34	13	Oxidation (M)	79824.8	78273.1	84894.4	80997.4	1750.53	1616.52	1781.72	1716.26	0.021189	2.41935e-06	48162	Keratin, type I cytoskeletal 17 OS=Mus musculus OX=10090 GN=Krt17 PE=1 SV=3
2722	TRUE	Q9D823|RL37_MOUSE	23.83	7.22	1	1		845.304	918.872	796.421	853.533	499.052	616.636	537.142	550.943	0.645486	0.00366931	11078	60S ribosomal protein L37 OS=Mus musculus OX=10090 GN=Rpl37 PE=1 SV=3
2910	TRUE	P04925|PRIO_MOUSE	23.77	7.87	2	2		1151.25	1220.43	816.006	1062.56	343.699	488.206	395.075	408.993	0.384913	0.00772329	27977	Major prion protein OS=Mus musculus OX=10090 GN=Prnp PE=1 SV=2
777	TRUE	P70296|PEBP1_MOUSE	42.42	55.08	8	8	Oxidation (M)	68599.4	67629.2	66510	67579.5	26518.7	27030.6	22789.1	25446.1	0.376536	8.74004e-06	20830	Phosphatidylethanolamine-binding protein 1 OS=Mus musculus OX=10090 GN=Pebp1 PE=1 SV=3
2535	TRUE	Q9D924|ISCA1_MOUSE	41.18	19.38	2	2		1113.02	1211.83	1059.47	1128.1	450.756	393.804	391.435	411.998	0.365213	0.000124027	14188	Iron-sulfur cluster assembly 1 homolog, mitochondrial OS=Mus musculus OX=10090 GN=Isca1 PE=2 SV=1
1659	TRUE	Q8C0L0|TMX4_MOUSE	12.22	15.52	4	4		1050.44	1266.25	1150.28	1155.66	875.324	998.306	696.725	856.785	0.741383	0.0497932	37131	Thioredoxin-related transmembrane protein 4 OS=Mus musculus OX=10090 GN=Tmx4 PE=1 SV=2
1159	TRUE	A2A699|F1712_MOUSE	12.66	8.76	6	6		307.121	313.735	200.715	273.857	661.901	597.212	351.911	537.008	1.96091	0.0601376	87487	Protein FAM171A2 OS=Mus musculus OX=10090 GN=Fam171a2 PE=1 SV=1
3366	TRUE	Q8BTY1|KAT1_MOUSE	11.56	3.07	1	1		153.015	137.801	92.6965	127.837	95.1876	50.0666	69.7908	71.6816	0.560725	0.0657073	47564	Kynurenine--oxoglutarate transaminase 1 OS=Mus musculus OX=10090 GN=Kyat1 PE=1 SV=1
1527	TRUE	Q9D5T0|ATAD1_MOUSE	22.57	7.76	3	3		713.835	1172.21	945.44	943.828	408.116	265.587	329.194	334.299	0.354195	0.0117106	40744	Outer mitochondrial transmembrane helix translocase OS=Mus musculus OX=10090 GN=Atad1 PE=1 SV=1
2164	TRUE	Q80XR2|AT2C1_MOUSE	2.49	3.59	3	3	N-ethylmaleimide on cysteines	154.684	129.042	181.543	155.09	119.648	208.459	86.5173	138.208	0.891148	0.690615	100299	Calcium-transporting ATPase type 2C member 1 OS=Mus musculus OX=10090 GN=Atp2c1 PE=1 SV=2
769	TRUE	P28661|SEPT4_MOUSE	23.11	15.9	9	6		1598.76	1358.89	1072.93	1343.53	649.23	559.37	691.776	633.459	0.471489	0.0106168	54936	Septin-4 OS=Mus musculus OX=10090 GN=Septin4 PE=1 SV=1
2582	TRUE	P21661|NEC2_MOUSE	12.92	3.92	2	2		274.553	520.941	468.503	421.332	255.967	228.893	202.501	229.12	0.543799	0.0658931	70785	Neuroendocrine convertase 2 OS=Mus musculus OX=10090 GN=Pcsk2 PE=1 SV=1
2020	TRUE	Q8BY87|UBP47_MOUSE	5.18	1.82	2	2		177.428	178.157	151.433	169.006	51.8874	173.753	140.18	121.94	0.721512	0.276564	157455	Ubiquitin carboxyl-terminal hydrolase 47 OS=Mus musculus OX=10090 GN=Usp47 PE=1 SV=2
1947	TRUE	Q9CY64|BIEA_MOUSE	14.48	9.49	3	3		579.212	1204.65	1083.93	955.932	446.172	461.628	296.321	401.374	0.419877	0.0492495	33525	Biliverdin reductase A OS=Mus musculus OX=10090 GN=Blvra PE=1 SV=1
3768	TRUE	P70205|PACR_MOUSE	3.41	1.41	1	1		192.273	138.724	231.609	187.535	226.02	121.917	118.057	155.332	0.828278	0.508793	56640	Pituitary adenylate cyclase-activating polypeptide type I receptor OS=Mus musculus OX=10090 GN=Adcyap1r1 PE=1 SV=1
3149	TRUE	Q8VBZ3|CLPT1_MOUSE	4.59	2.56	1	1		220.556	238.93	162.099	207.195	176.716	170.666	191.328	179.57	0.86667	0.313159	75291	Putative lipid scramblase CLPTM1 OS=Mus musculus OX=10090 GN=Clptm1 PE=1 SV=1
1215	TRUE	Q5F2E8|TAOK1_MOUSE	7.85	2.4	4	2		412.993	316.953	325.965	351.97	354.752	209.926	219.82	261.5	0.742959	0.180608	116050	Serine/threonine-protein kinase TAO1 OS=Mus musculus OX=10090 GN=Taok1 PE=1 SV=1
1786	TRUE	P60521|GBRL2_MOUSE	15.61	35.04	5	5		917.851	1029.21	866.961	938.007	347.003	507.417	657.426	503.948	0.537254	0.0129398	13667	Gamma-aminobutyric acid receptor-associated protein-like 2 OS=Mus musculus OX=10090 GN=Gabarapl2 PE=1 SV=1
1970	TRUE	Q91ZZ3|SYUB_MOUSE	6.86	29.32	4	2		989.609	473.147	1929.42	1130.72	692.809	530.21	220.847	481.289	0.425647	0.220911	14052	Beta-synuclein OS=Mus musculus OX=10090 GN=Sncb PE=1 SV=1
1864	TRUE	P27048|RSMB_MOUSE	29.49	22.51	5	5		3372.8	3558.77	3528.84	3486.8	1032.1	1554.32	1310.39	1298.94	0.37253	0.000171857	23656	Small nuclear ribonucleoprotein-associated protein B OS=Mus musculus OX=10090 GN=Snrpb PE=1 SV=1
311	FALSE	Q8BMA3|CNKR3_MOUSE	11.76	3.6	1	1		280.527	303.618	366.37	316.838	244.229	273.827	232.116	250.057	0.789227	0.0789774	61870	Connector enhancer of kinase suppressor of ras 3 OS=Mus musculus OX=10090 GN=Cnksr3 PE=1 SV=1
2232	TRUE	Q9R0N0|GALK1_MOUSE	0.91	8.42	3	3		442.745	428.025	470.398	447.056	445.836	421.145	495.149	454.043	1.01563	0.794118	42295	Galactokinase OS=Mus musculus OX=10090 GN=Galk1 PE=1 SV=2
2503	TRUE	P38060|HMGCL_MOUSE	20.74	7.38	2	2		947.851	1396.01	1245.33	1196.39	699.711	588.213	649.615	645.846	0.539827	0.0153304	34239	Hydroxymethylglutaryl-CoA lyase, mitochondrial OS=Mus musculus OX=10090 GN=Hmgcl PE=1 SV=2
2658	TRUE	Q9CQI6|COTL1_MOUSE	40.87	16.2	3	3		2717.49	2743.02	2591.02	2683.84	1423.35	1436.57	1573.4	1477.77	0.550618	5.64822e-05	15944	Coactosin-like protein OS=Mus musculus OX=10090 GN=Cotl1 PE=1 SV=3
2957	TRUE	Q9R112|SQOR_MOUSE	16.03	3.11	1	1		224.19	188.368	264.27	225.609	155.107	126.849	159.07	147.008	0.651606	0.0312602	50282	Sulfide:quinone oxidoreductase, mitochondrial OS=Mus musculus OX=10090 GN=Sqor PE=1 SV=3
887	TRUE	P32921|SYWC_MOUSE	18.92	23.28	10	10		2357.49	1810.01	2181.13	2116.21	1512.2	1169.34	1148.77	1276.77	0.603327	0.0136822	54358	Tryptophan--tRNA ligase, cytoplasmic OS=Mus musculus OX=10090 GN=Wars1 PE=1 SV=2
1988	TRUE	P63321|RALA_MOUSE	36.21	16.02	3	3	Oxidation (M)	2995.35	2849.22	2806.73	2883.76	531.928	795.846	591.879	639.884	0.221892	2.17336e-05	23553	Ras-related protein Ral-A OS=Mus musculus OX=10090 GN=Rala PE=1 SV=1
923	TRUE	Q9JJK2|LANC2_MOUSE	30.84	27.33	10	10		10379	10677.3	10958.2	10671.5	6160.4	6877.43	7253.46	6763.76	0.633816	0.000415915	50777	LanC-like protein 2 OS=Mus musculus OX=10090 GN=Lancl2 PE=1 SV=1
2553	TRUE	Q9DBR7|MYPT1_MOUSE	6.82	2.04	2	2		446.552	409.124	291.344	382.34	251.809	266.33	363.841	293.993	0.768931	0.205605	114996	Protein phosphatase 1 regulatory subunit 12A OS=Mus musculus OX=10090 GN=Ppp1r12a PE=1 SV=2
906	TRUE	Q8R366|IGSF8_MOUSE	26.12	22.09	11	11		6911.42	8527.8	8592.56	8010.59	12766.2	13747.5	14235.9	13583.2	1.69566	0.00134428	65011	Immunoglobulin superfamily member 8 OS=Mus musculus OX=10090 GN=Igsf8 PE=1 SV=2
125	FALSE	P0DI97|NRX1B_MOUSE	18.86	13.03	5	5		3269.84	3279.78	3163.29	3237.64	2144.79	2727.07	2310.55	2394.14	0.73947	0.00890005	50223	Neurexin-1-beta OS=Mus musculus OX=10090 GN=Nrxn1 PE=1 SV=1
263	TRUE	Q61699|HS105_MOUSE	16.06	25.76	19	19		9349.07	7082.46	8786.56	8406.03	5129.56	5512.49	6500.73	5714.26	0.679781	0.0275773	96407	Heat shock protein 105 kDa OS=Mus musculus OX=10090 GN=Hsph1 PE=1 SV=2
517	TRUE	Q641P0|ARP3B_MOUSE	13.97	18.66	12	8		3189.21	2589.49	2871.79	2883.49	2366.29	1608.17	1427.82	1800.76	0.624506	0.0321088	47580	Actin-related protein 3B OS=Mus musculus OX=10090 GN=Actr3b PE=1 SV=1
3353	TRUE	Q8BGG7|UBS3B_MOUSE	0.31	1.88	1	1		179.493	105.884	147.853	144.41	136.21	128.687	153.202	139.367	0.965075	0.833752	71443	Ubiquitin-associated and SH3 domain-containing protein B OS=Mus musculus OX=10090 GN=Ubash3b PE=1 SV=1
2039	TRUE	Q9WTL7|LYPA2_MOUSE	34.19	13.42	4	4		4813.99	5094.95	4384.84	4764.59	2760.18	2484.2	2503.94	2582.77	0.542077	0.000630805	24794	Acyl-protein thioesterase 2 OS=Mus musculus OX=10090 GN=Lypla2 PE=1 SV=1
214	TRUE	Q6P9K9|NRX3A_MOUSE	30.49	14.32	23	18		2207.72	2470.67	2121.93	2266.77	1417.11	1316.61	1233.18	1322.3	0.58334	0.0013051	173428	Neurexin-3 OS=Mus musculus OX=10090 GN=Nrxn3 PE=1 SV=2
3940	TRUE	Q9D9H8|CB069_MOUSE	7.62	2.74	1	1		165.119	148.3	118.939	144.119	129.17	113.957	70.9412	104.689	0.726406	0.148228	41689	Mitochondrial protein C2orf69 homolog OS=Mus musculus OX=10090 PE=2 SV=3
1340	TRUE	Q8JZU2|TXTP_MOUSE	29.44	20.26	7	7		1606.37	1798.53	1744.26	1716.39	955.43	1070.69	1125.82	1050.65	0.612127	0.00094099	33931	Tricarboxylate transport protein, mitochondrial OS=Mus musculus OX=10090 GN=Slc25a1 PE=1 SV=1
575	TRUE	P28740|KIF2A_MOUSE	31.72	17.73	14	14		4337.17	3874.34	3736.09	3982.53	2232.22	1857.29	1923.99	2004.5	0.503323	0.000780025	79756	Kinesin-like protein KIF2A OS=Mus musculus OX=10090 GN=Kif2a PE=1 SV=2
2499	TRUE	O35566|CD151_MOUSE	11.25	5.93	1	1		324.073	307.31	153.848	261.744	425.43	412.537	555.071	464.346	1.77405	0.0457592	28246	CD151 antigen OS=Mus musculus OX=10090 GN=Cd151 PE=1 SV=2
461	TRUE	Q6P5E4|UGGG1_MOUSE	10.78	7.29	11	11		553.09	624.091	728.569	635.25	858.941	846.388	701.886	802.405	1.26313	0.0800465	176434	UDP-glucose:glycoprotein glucosyltransferase 1 OS=Mus musculus OX=10090 GN=Uggt1 PE=1 SV=4
2909	TRUE	O08842|GFRA2_MOUSE	35.43	5.39	2	2		1697.49	1816.3	1937.21	1817	806.793	651.258	770.611	742.887	0.408854	0.000212062	51727	GDNF family receptor alpha-2 OS=Mus musculus OX=10090 GN=Gfra2 PE=1 SV=2
1423	TRUE	Q04736|YES_MOUSE	4.27	1.66	6	1		18.6569	18.6569	23.7099	20.3412	18.6569	18.6569	18.6569	18.6569	0.917195	0.373901	60630	Tyrosine-protein kinase Yes OS=Mus musculus OX=10090 GN=Yes1 PE=1 SV=3
2420	TRUE	Q99L27|GMPR2_MOUSE	2.75	3.74	1	1		27.2631	213.665	139.695	126.874	134.987	150.536	145.495	143.673	1.1324	0.77283	38019	GMP reductase 2 OS=Mus musculus OX=10090 GN=Gmpr2 PE=1 SV=2
1748	TRUE	P35980|RL18_MOUSE	33.36	36.17	6	6		7626.91	7314.8	7782.75	7574.82	3724.1	3972.67	4512.85	4069.87	0.53729	0.000204451	21645	60S ribosomal protein L18 OS=Mus musculus OX=10090 GN=Rpl18 PE=1 SV=3
3252	TRUE	Q91W82|UB2E2_MOUSE	1.42	5.47	1	1		185.696	57.9144	147.825	130.478	113.56	63.8753	135.018	104.151	0.798225	0.576484	22241	Ubiquitin-conjugating enzyme E2 E2 OS=Mus musculus OX=10090 GN=Ube2e2 PE=2 SV=1
608	TRUE	A2AWA9|RBGP1_MOUSE	8.25	7.14	7	7		938.077	1225.8	1094.04	1085.97	418.019	586.875	1087.2	697.363	0.642156	0.148444	120798	Rab GTPase-activating protein 1 OS=Mus musculus OX=10090 GN=Rabgap1 PE=1 SV=1
1146	TRUE	Q3UHD6|SNX27_MOUSE	23.51	9.83	5	5		1158.51	1180.12	1157.7	1165.44	661.075	453.642	643.429	586.049	0.502855	0.000972549	60989	Sorting nexin-27 OS=Mus musculus OX=10090 GN=Snx27 PE=1 SV=2
365	FALSE	Q91YH6|VATB1_MOUSE	56.62	10.33	5	5	Oxidation (M)	16261.7	16765.5	16639.2	16555.5	9087.33	9374.44	9399.94	9287.24	0.560977	2.32342e-06	56791	V-type proton ATPase subunit B, kidney isoform OS=Mus musculus OX=10090 GN=Atp6v1b1 PE=1 SV=1
2348	TRUE	Q5U3K5|RABL6_MOUSE	17.03	6.62	4	4		606.327	852.772	564.958	674.686	437.43	338.45	307.848	361.243	0.535424	0.0329325	79831	Rab-like protein 6 OS=Mus musculus OX=10090 GN=Rabl6 PE=1 SV=2
1969	TRUE	O55222|ILK_MOUSE	0.15	5.75	2	2		169.296	97.691	72.2377	113.075	80.8033	120.885	117.663	106.45	0.941413	0.845022	51373	Integrin-linked protein kinase OS=Mus musculus OX=10090 GN=Ilk PE=1 SV=2
2136	TRUE	Q9CZR3|TM40L_MOUSE	6.99	2.92	1	1		333.942	329.685	568.815	410.814	487.478	543.271	550.547	527.099	1.28306	0.226719	34005	Mitochondrial import receptor subunit TOM40B OS=Mus musculus OX=10090 GN=Tomm40l PE=1 SV=1
1344	TRUE	Q9JHK4|PGTA_MOUSE	5.6	7.76	5	5		976.847	1005.34	633.594	871.927	857.465	652.087	449.147	652.9	0.748801	0.261851	64989	Geranylgeranyl transferase type-2 subunit alpha OS=Mus musculus OX=10090 GN=Rabggta PE=1 SV=1
1110	TRUE	P07744|K2C4_MOUSE	51.59	1.71	9	1		1112.37	1186.86	1114.89	1138.04	18.6569	57.9541	52.787	43.1326	0.0379009	2.32851e-06	56283	Keratin, type II cytoskeletal 4 OS=Mus musculus OX=10090 GN=Krt4 PE=1 SV=2
889	TRUE	Q99LR1|ABD12_MOUSE	41.99	16.08	6	6		2484.36	2241.4	2452.84	2392.87	1158.2	1095.75	1041.46	1098.47	0.459061	0.00010062	45270	Lysophosphatidylserine lipase ABHD12 OS=Mus musculus OX=10090 GN=Abhd12 PE=1 SV=2
699	TRUE	Q80TL4|PHF24_MOUSE	54.12	31	14	14	Acetylation (Protein N-term)	22040.9	21887.5	23314.5	22414.3	9283.96	9276.72	9688.61	9416.43	0.420108	1.03698e-05	45223	PHD finger protein 24 OS=Mus musculus OX=10090 GN=Phf24 PE=1 SV=2
2121	TRUE	Q8K377|LRRT1_MOUSE	3.27	3.26	2	2		260.059	494.623	392.129	382.27	248.718	290.396	399.651	312.922	0.818587	0.442518	58718	Leucine-rich repeat transmembrane neuronal protein 1 OS=Mus musculus OX=10090 GN=Lrrtm1 PE=2 SV=1
33	TRUE	A2AN08|UBR4_MOUSE	1.76	7.12	33	33		25055.4	13661.2	18199.1	18971.9	19591.7	19895.9	20404.7	19964.1	1.0523	0.779959	572290	E3 ubiquitin-protein ligase UBR4 OS=Mus musculus OX=10090 GN=Ubr4 PE=1 SV=1
1175	TRUE	P55264|ADK_MOUSE	47.59	14.96	5	5		5606.16	5348.01	5321.95	5425.38	2061.38	2042.3	2278.67	2127.45	0.39213	9.8215e-06	40149	Adenosine kinase OS=Mus musculus OX=10090 GN=Adk PE=1 SV=2
2807	TRUE	P62274|RS29_MOUSE	6.36	19.64	1	1		335.704	232.164	361.793	309.887	172.728	258.744	272.199	234.557	0.75691	0.209143	6677	40S ribosomal protein S29 OS=Mus musculus OX=10090 GN=Rps29 PE=1 SV=2
848	TRUE	P62702|RS4X_MOUSE	22.72	39.54	12	12		4487.96	4022.95	3757.87	4089.59	2143.65	1806.28	1287.74	1745.89	0.42691	0.00202597	29598	40S ribosomal protein S4, X isoform OS=Mus musculus OX=10090 GN=Rps4x PE=1 SV=2
3011	TRUE	Q9CQ60|6PGL_MOUSE	22.17	5.84	1	1		544.097	350.448	475.065	456.537	168.232	75.6257	93.4011	112.42	0.246244	0.00557923	27254	6-phosphogluconolactonase OS=Mus musculus OX=10090 GN=Pgls PE=1 SV=1
597	TRUE	P47738|ALDH2_MOUSE	49.6	24.08	14	11		10183	10366.3	10120.3	10223.2	4783.63	4615.31	4335.35	4578.1	0.447814	2.98721e-06	56538	Aldehyde dehydrogenase, mitochondrial OS=Mus musculus OX=10090 GN=Aldh2 PE=1 SV=1
84	TRUE	P17426|AP2A1_MOUSE	55.77	23.54	33	24	Oxidation (M)	16491.3	16125.4	16359.2	16325.3	11534.2	11306.9	11515.2	11452.1	0.701495	2.9667e-06	107664	AP-2 complex subunit alpha-1 OS=Mus musculus OX=10090 GN=Ap2a1 PE=1 SV=1
1362	TRUE	P0DP26|CALM1_MOUSE	62.77	26.85	6	4	Oxidation (M)	18964	18513.8	18501.1	18659.6	5261.52	4952.13	5274.05	5162.57	0.276671	2.11866e-07	16838	Calmodulin-1 OS=Mus musculus OX=10090 GN=Calm1 PE=1 SV=1
430	TRUE	Q8BKX1|BAIP2_MOUSE	38.48	39.44	19	19		5027.1	5195.06	5114.22	5112.13	2621.49	2858.15	2441.01	2640.22	0.516462	4.52733e-05	59237	Brain-specific angiogenesis inhibitor 1-associated protein 2 OS=Mus musculus OX=10090 GN=Baiap2 PE=1 SV=2
2914	TRUE	Q9CR09|UFC1_MOUSE	26.09	5.99	1	1		715.806	765.203	762.194	747.734	292.887	424.764	313.024	343.559	0.459466	0.000781598	19481	Ubiquitin-fold modifier-conjugating enzyme 1 OS=Mus musculus OX=10090 GN=Ufc1 PE=1 SV=1
70	TRUE	Q9DBG3|AP2B1_MOUSE	49.38	20.06	28	16	Oxidation (M)	28080.2	28649.4	28190.4	28306.7	19263.1	19846.2	19008	19372.4	0.684377	7.89706e-06	104583	AP-2 complex subunit beta OS=Mus musculus OX=10090 GN=Ap2b1 PE=1 SV=1
453	TRUE	Q6NZL0|SOGA3_MOUSE	22.3	14.92	15	15		1423.41	1977.11	2079.51	1826.68	829.37	991.952	885.477	902.266	0.493938	0.011539	103480	Protein SOGA3 OS=Mus musculus OX=10090 GN=Soga3 PE=1 SV=2
3024	TRUE	Q9CQZ6|NDUB3_MOUSE	49.38	17.31	2	2		1891.01	2023.48	2065.33	1993.27	812.955	756.943	761.039	776.979	0.389801	2.57359e-05	11692	NADH dehydrogenase [ubiquinone] 1 beta subcomplex subunit 3 OS=Mus musculus OX=10090 GN=Ndufb3 PE=1 SV=1
138	TRUE	A2AGT5|CKAP5_MOUSE	21.57	11.71	23	23		2111.25	1766.96	1654.13	1844.11	944.995	1140.14	1195.53	1093.55	0.592998	0.00878734	225635	Cytoskeleton-associated protein 5 OS=Mus musculus OX=10090 GN=Ckap5 PE=1 SV=1
1500	TRUE	Q63912|OMGP_MOUSE	64.75	11.36	5	5	Oxidation (M)	30278.5	29976.6	30338.2	30197.8	11519.3	11826.1	12088.9	11811.4	0.391135	8.23254e-08	49284	Oligodendrocyte-myelin glycoprotein OS=Mus musculus OX=10090 GN=Omg PE=1 SV=1
1674	TRUE	Q6P9R2|OXSR1_MOUSE	40.65	2.28	1	1		134.299	53.5983	71.2812	86.3929	18.6569	18.6569	18.6569	18.6569	0.215954	0.0505508	58214	Serine/threonine-protein kinase OSR1 OS=Mus musculus OX=10090 GN=Oxsr1 PE=1 SV=1
1435	TRUE	O88998|NOE1_MOUSE	12.68	13.81	7	7		2665.23	2406.85	2905.08	2659.05	1215.51	1497.92	2239.45	1650.96	0.620882	0.0404686	55398	Noelin OS=Mus musculus OX=10090 GN=Olfm1 PE=1 SV=1
1753	TRUE	Q80WM4|HPLN4_MOUSE	7.67	10.25	2	2		392.139	453.746	441.966	429.284	283.801	64.0663	321.536	223.134	0.519783	0.0667826	42809	Hyaluronan and proteoglycan link protein 4 OS=Mus musculus OX=10090 GN=Hapln4 PE=2 SV=2
932	FALSE	Q9DC53|CPNE8_MOUSE	14.2	11.27	7	6		1331.39	1036.9	1465.86	1278.05	387.244	785.16	712.754	628.386	0.491676	0.0210431	64667	Copine-8 OS=Mus musculus OX=10090 GN=Cpne8 PE=2 SV=3
262	TRUE	Q91WC3|ACSL6_MOUSE	38.09	28.69	20	19		7362.84	7787.18	7413.25	7521.09	4817.27	4918.93	4482.01	4739.4	0.630149	0.000121415	78017	Long-chain-fatty-acid--CoA ligase 6 OS=Mus musculus OX=10090 GN=Acsl6 PE=1 SV=1
747	TRUE	P83741|WNK1_MOUSE	5.05	1.6	6	4		446.233	545.791	455.517	482.514	635.726	477.931	526.153	546.603	1.13282	0.319723	250934	Serine/threonine-protein kinase WNK1 OS=Mus musculus OX=10090 GN=Wnk1 PE=1 SV=2
3207	TRUE	Q6PFD9|NUP98_MOUSE	0.97	0.5	1	1		111.192	140.129	108.618	119.98	86.3145	161.161	144.215	130.564	1.08821	0.69162	197241	Nuclear pore complex protein Nup98-Nup96 OS=Mus musculus OX=10090 GN=Nup98 PE=1 SV=2
1129	TRUE	O08919|NUMBL_MOUSE	32.22	11.42	7	6		2068.07	2130.82	1826.35	2008.42	943.071	1033.09	1116.25	1030.8	0.513241	0.00075228	64130	Numb-like protein OS=Mus musculus OX=10090 GN=Numbl PE=1 SV=3
682	TRUE	Q80VP0|TCPR1_MOUSE	8.28	9.78	9	9		1864.23	3832.57	1752.76	2483.19	1488.35	1650.97	1225.91	1455.07	0.585971	0.208704	130266	Tectonin beta-propeller repeat-containing protein 1 OS=Mus musculus OX=10090 GN=Tecpr1 PE=1 SV=1
2512	TRUE	P60670|NPL4_MOUSE	10.37	4.77	2	2		888.013	649.802	655.99	731.268	54.2443	263.548	417.488	245.093	0.335162	0.0207582	68017	Nuclear protein localization protein 4 homolog OS=Mus musculus OX=10090 GN=Nploc4 PE=1 SV=3
346	TRUE	P10630|IF4A2_MOUSE	33.97	18.67	19	9		5640.33	7084.33	6410.97	6378.54	1970.11	2505.03	2074.98	2183.38	0.3423	0.000725074	46402	Eukaryotic initiation factor 4A-II OS=Mus musculus OX=10090 GN=Eif4a2 PE=1 SV=2
128	TRUE	Q9ERD7|TBB3_MOUSE	62.69	28.22	21	7	Oxidation (M)	41991.2	42015.8	40861.9	41623	18876.1	19209.7	19524.1	19203.3	0.461362	7.66327e-07	50419	Tubulin beta-3 chain OS=Mus musculus OX=10090 GN=Tubb3 PE=1 SV=1
254	TRUE	Q9JME5|AP3B2_MOUSE	38.07	18.95	17	17		2096.47	1948.08	2178.34	2074.29	1094.07	1036.21	958.579	1029.62	0.496371	0.000179601	119193	AP-3 complex subunit beta-2 OS=Mus musculus OX=10090 GN=Ap3b2 PE=1 SV=2
2217	TRUE	P53995|APC1_MOUSE	0.59	0.46	1	1		155.18	135.133	85.5183	125.277	169.735	142.075	61.8413	124.55	0.994198	0.98581	215994	Anaphase-promoting complex subunit 1 OS=Mus musculus OX=10090 GN=Anapc1 PE=1 SV=2
2765	TRUE	A2ADY9|DDI2_MOUSE	13.93	2.26	1	1		200.137	167.11	154.1	173.782	133.323	100.007	75.1116	102.814	0.591625	0.0308984	44591	Protein DDI1 homolog 2 OS=Mus musculus OX=10090 GN=Ddi2 PE=1 SV=1
1977	TRUE	Q99M87|DNJA3_MOUSE	11.6	9.17	4	4		2161.04	1963.36	2066.09	2063.5	1661.39	1083.45	651.99	1132.28	0.548718	0.0353334	52443	DnaJ homolog subfamily A member 3, mitochondrial OS=Mus musculus OX=10090 GN=Dnaja3 PE=1 SV=1
955	TRUE	O08529|CAN2_MOUSE	43.87	15.43	10	10		2097.12	2411.32	2204.24	2237.56	982.801	986.984	1008.87	992.886	0.443736	0.000177006	79872	Calpain-2 catalytic subunit OS=Mus musculus OX=10090 GN=Capn2 PE=1 SV=4
776	TRUE	Q91ZJ5|UGPA_MOUSE	19.75	17.13	8	8		2858.27	2561.17	2294.43	2571.29	1657.11	1197.42	1022.96	1292.5	0.502665	0.00686831	56979	UTP--glucose-1-phosphate uridylyltransferase OS=Mus musculus OX=10090 GN=Ugp2 PE=1 SV=3
894	TRUE	Q91VM9|IPYR2_MOUSE	23.1	25.76	7	7	Oxidation (M)	3169.12	3489.05	3363.54	3340.57	768.472	1323.3	1399.72	1163.83	0.348394	0.000581535	38115	Inorganic pyrophosphatase 2, mitochondrial OS=Mus musculus OX=10090 GN=Ppa2 PE=1 SV=1
1466	TRUE	Q00PI9|HNRL2_MOUSE	2.03	5.77	4	4		1414.26	1627.92	1245.89	1429.36	2224.15	2543.46	873.153	1880.26	1.31546	0.43781	84940	Heterogeneous nuclear ribonucleoprotein U-like protein 2 OS=Mus musculus OX=10090 GN=Hnrnpul2 PE=1 SV=2
2833	TRUE	Q9ES56|TPPC4_MOUSE	12.92	7.76	2	2		204.542	263.05	330.563	266.051	102.905	166.839	172.449	147.398	0.55402	0.0498783	24385	Trafficking protein particle complex subunit 4 OS=Mus musculus OX=10090 GN=Trappc4 PE=1 SV=1
2751	TRUE	Q9CPQ3|TOM22_MOUSE	21.26	8.45	1	1		209.273	234.474	205.431	216.392	78.265	124.218	113.585	105.356	0.486875	0.00260337	15537	Mitochondrial import receptor subunit TOM22 homolog OS=Mus musculus OX=10090 GN=Tomm22 PE=1 SV=3
773	TRUE	P48320|DCE2_MOUSE	44.47	17.78	10	9		6729.41	7347.47	7202.23	7093.04	3125.08	3008.25	2783.94	2972.42	0.419062	4.11043e-05	65224	Glutamate decarboxylase 2 OS=Mus musculus OX=10090 GN=Gad2 PE=1 SV=1
2592	FALSE	Q9CQV6|MLP3B_MOUSE	37.28	11.2	2	2		2716.47	2858.03	3188.05	2920.85	1285.37	1213.83	1091.29	1196.83	0.409754	0.00033369	14617	Microtubule-associated proteins 1A/1B light chain 3B OS=Mus musculus OX=10090 GN=Map1lc3b PE=1 SV=3
2429	TRUE	Q3UFF7|LYPL1_MOUSE	5.32	13.39	2	2		167.376	147.469	79.0029	131.283	229.71	173.233	134.487	179.143	1.36456	0.281486	26354	Lysophospholipase-like protein 1 OS=Mus musculus OX=10090 GN=Lyplal1 PE=1 SV=3
2438	TRUE	O70400|PDLI1_MOUSE	18.87	6.73	2	2		585.754	448.065	415.223	483.014	312.764	285.275	306.323	301.454	0.624111	0.0264726	35774	PDZ and LIM domain protein 1 OS=Mus musculus OX=10090 GN=Pdlim1 PE=1 SV=4
2367	TRUE	P28659|CELF1_MOUSE	16.23	3.29	2	2		1124.71	965.629	1263.68	1118.01	795.929	460.712	472.765	576.469	0.515621	0.0178211	52107	CUGBP Elav-like family member 1 OS=Mus musculus OX=10090 GN=Celf1 PE=1 SV=2
1443	TRUE	D3YZI9|PGBD5_MOUSE	3.65	4.21	2	2		350.529	289.551	453.307	364.462	234.021	367.625	327.202	309.616	0.849515	0.426559	58300	PiggyBac transposable element-derived protein 5 OS=Mus musculus OX=10090 GN=Pgbd5 PE=1 SV=1
2337	TRUE	Q9JM13|RABX5_MOUSE	3.3	4.48	2	2		215.016	315.108	261.748	263.958	232.196	258.068	222.406	237.556	0.899979	0.4398	56869	Rab5 GDP/GTP exchange factor OS=Mus musculus OX=10090 GN=Rabgef1 PE=1 SV=1
1107	TRUE	P15864|H12_MOUSE	25.4	15.09	10	3	Acetylation (Protein N-term)	1647.73	1323.99	1376.89	1449.54	805.717	931.678	842.097	859.831	0.593177	0.00529303	21267	Histone H1.2 OS=Mus musculus OX=10090 GN=H1-2 PE=1 SV=2
821	TRUE	Q8BH57|WDR48_MOUSE	18.02	14.79	10	10		1744.48	1376.35	1700.89	1607.24	1108.22	760.193	699.977	856.129	0.53267	0.0120607	76007	WD repeat-containing protein 48 OS=Mus musculus OX=10090 GN=Wdr48 PE=1 SV=1
2641	TRUE	P35979|RL12_MOUSE	30.78	24.24	3	3		2929.02	2279.11	2879.43	2695.85	1231.5	1122.8	1028.46	1127.59	0.418267	0.00194263	17805	60S ribosomal protein L12 OS=Mus musculus OX=10090 GN=Rpl12 PE=1 SV=2
3682	TRUE	P61148|FGF1_MOUSE	4.87	7.1	1	1		342.255	71.4	230.005	214.553	301.369	312.271	290.034	301.225	1.40396	0.333297	17418	Fibroblast growth factor 1 OS=Mus musculus OX=10090 GN=Fgf1 PE=1 SV=1
2483	TRUE	Q80VP9|ASPH2_MOUSE	15.85	3.5	1	1		299.367	243.479	305.552	282.799	155.489	192.877	214.989	187.785	0.664022	0.0224772	38731	Aspartate beta-hydroxylase domain-containing protein 2 OS=Mus musculus OX=10090 GN=Asphd2 PE=1 SV=1
25	TRUE	Q8BX70|VP13C_MOUSE	18.14	11.82	39	39		1317.76	1136.59	1587.7	1347.35	1976.17	1959.75	1998.07	1978	1.46806	0.00868191	420089	Intermembrane lipid transfer protein VPS13C OS=Mus musculus OX=10090 GN=Vps13c PE=1 SV=2
2496	TRUE	Q91VW3|SH3L3_MOUSE	63.35	31.18	3	3		3465.68	3369.42	3335.73	3390.28	1125.63	1147.37	1180.81	1151.27	0.33958	7.49241e-07	10477	SH3 domain-binding glutamic acid-rich-like protein 3 OS=Mus musculus OX=10090 GN=Sh3bgrl3 PE=1 SV=1
622	TRUE	Q61191|HCFC1_MOUSE	2.55	3.42	6	6		913.764	1369.83	880.898	1054.83	1201.95	1020.8	1203.2	1141.98	1.08262	0.633309	210437	Host cell factor 1 OS=Mus musculus OX=10090 GN=Hcfc1 PE=1 SV=2
3873	TRUE	P63056|NOE3_MOUSE	6.21	2.51	1	1		151.916	123.473	63.4315	112.94	83.6688	65.2543	70.0715	72.9982	0.646344	0.208401	54886	Noelin-3 OS=Mus musculus OX=10090 GN=Olfm3 PE=1 SV=1
2605	TRUE	Q7M6Z0|R4RL2_MOUSE	19.6	5	2	2		611.652	607.991	900.996	706.88	376.538	269.467	354.515	333.507	0.471801	0.0218486	46075	Reticulon-4 receptor-like 2 OS=Mus musculus OX=10090 GN=Rtn4rl2 PE=1 SV=1
3456	TRUE	Q9WVQ5|MTNB_MOUSE	3.86	5.81	1	1		157.812	234.278	146.525	179.538	154.569	148.816	157.309	153.565	0.855331	0.401132	26949	Methylthioribulose-1-phosphate dehydratase OS=Mus musculus OX=10090 GN=Apip PE=1 SV=1
1840	TRUE	Q99KQ4|NAMPT_MOUSE	22.6	4.07	1	1		177.982	193.345	147.259	172.862	90.6227	107.628	105.72	101.324	0.586153	0.00799909	55447	Nicotinamide phosphoribosyltransferase OS=Mus musculus OX=10090 GN=Nampt PE=1 SV=1
1499	TRUE	Q60790|RASA3_MOUSE	0.36	4.8	4	4		422.713	427.585	299.989	383.429	276.786	440.527	419.135	378.816	0.98797	0.947797	95987	Ras GTPase-activating protein 3 OS=Mus musculus OX=10090 GN=Rasa3 PE=1 SV=2
586	TRUE	Q6ZWR6|SYNE1_MOUSE	19.33	1.06	8	8	Acetylation (Protein N-term)	91064	88002.7	86354.1	88473.6	83090	81211.1	80275.8	81525.6	0.921468	0.0124645	1009926	Nesprin-1 OS=Mus musculus OX=10090 GN=Syne1 PE=1 SV=2
2953	TRUE	Q80TR4|SLIT1_MOUSE	10.28	0.72	1	1		89.7604	110.392	133.721	111.291	76.4692	88.3923	86.9097	83.9238	0.754092	0.107611	167420	Slit homolog 1 protein OS=Mus musculus OX=10090 GN=Slit1 PE=1 SV=2
440	TRUE	P19246|NFH_MOUSE	28.72	12.02	15	13		2741.52	2514.92	2543.43	2599.95	1998.43	1829.3	1823.21	1883.65	0.724493	0.00143829	116994	Neurofilament heavy polypeptide OS=Mus musculus OX=10090 GN=Nefh PE=1 SV=3
119	FALSE	P58682|TLR8_MOUSE	0.17	0.68	1	1		646.891	285.937	1124.62	685.817	556.715	591.088	594.368	580.724	0.846762	0.687908	119358	Toll-like receptor 8 OS=Mus musculus OX=10090 GN=Tlr8 PE=1 SV=2
2350	TRUE	Q8K2T1|NMRL1_MOUSE	13.26	10.68	3	3		964.482	821.484	787.266	857.744	647.335	438.939	293.283	459.852	0.536118	0.0266734	34376	NmrA-like family domain-containing protein 1 OS=Mus musculus OX=10090 GN=Nmral1 PE=1 SV=1
1245	TRUE	Q9JHI5|IVD_MOUSE	39.08	13.44	6	6		3626.51	3956.95	3970.75	3851.4	1942.19	2161.88	2037.33	2047.14	0.53153	0.000152741	46325	Isovaleryl-CoA dehydrogenase, mitochondrial OS=Mus musculus OX=10090 GN=Ivd PE=1 SV=1
8	FALSE	E9PZQ0|RYR1_MOUSE	1.37	0.58	6	3		602.081	420.063	534.44	518.861	505.8	531.138	440.258	492.399	0.948998	0.680107	565039	Ryanodine receptor 1 OS=Mus musculus OX=10090 GN=Ryr1 PE=1 SV=1
419	FALSE	Q62095|DDX3Y_MOUSE	40.92	16.41	11	10		2418.49	2603.44	2730.61	2584.18	1309.97	1237.62	1336.08	1294.56	0.500954	0.000172462	73428	ATP-dependent RNA helicase DDX3Y OS=Mus musculus OX=10090 GN=Ddx3y PE=1 SV=2
1546	TRUE	Q640R3|HECAM_MOUSE	11.96	16.27	5	5		917.707	845.736	745.559	836.334	1143.25	916.46	1140.41	1066.71	1.27546	0.063034	46367	Hepatocyte cell adhesion molecule OS=Mus musculus OX=10090 GN=Hepacam PE=1 SV=2
2629	TRUE	Q8CAK1|CAF17_MOUSE	17.04	6.98	2	2		375.88	442.761	370.259	396.3	235.615	245.465	146.113	209.064	0.527541	0.00884321	38399	Putative transferase CAF17 homolog, mitochondrial OS=Mus musculus OX=10090 GN=Iba57 PE=1 SV=1
134	TRUE	Q8R0Y6|AL1L1_MOUSE	22.42	35.37	28	28		3224.1	3698.4	3478.72	3467.07	2485.09	2651.63	2230.97	2455.9	0.708349	0.00531097	98709	Cytosolic 10-formyltetrahydrofolate dehydrogenase OS=Mus musculus OX=10090 GN=Aldh1l1 PE=1 SV=1
2200	TRUE	P97411|ICA69_MOUSE	9.43	4.6	2	2		391.645	323.542	279.831	331.673	136.773	294.06	204.581	211.805	0.638595	0.0989188	54324	Islet cell autoantigen 1 OS=Mus musculus OX=10090 GN=Ica1 PE=1 SV=3
4001	TRUE	Q9DB27|MCTS1_MOUSE	6.81	6.63	1	1		407.56	550.849	308.161	422.19	323.026	238.669	355.351	305.682	0.724039	0.2122	20555	Malignant T-cell-amplified sequence 1 OS=Mus musculus OX=10090 GN=Mcts1 PE=1 SV=1
870	TRUE	Q8BSL7|ARF2_MOUSE	12.33	5.52	8	1		119.084	108.887	74.8033	100.925	56.2128	68.9461	70.9031	65.354	0.64755	0.0658909	20746	ADP-ribosylation factor 2 OS=Mus musculus OX=10090 GN=Arf2 PE=1 SV=2
3782	TRUE	Q9DCJ1|LST8_MOUSE	10.79	5.52	1	1		132.142	49.8887	97.2999	93.1103	18.6569	54.1963	18.6569	30.5034	0.327605	0.0783414	35851	Target of rapamycin complex subunit LST8 OS=Mus musculus OX=10090 GN=Mlst8 PE=1 SV=1
2191	TRUE	P40336|VP26A_MOUSE	3.08	7.65	3	2		651.575	412.957	520.842	528.458	563.265	593.037	132.451	429.584	0.812901	0.579159	38114	Vacuolar protein sorting-associated protein 26A OS=Mus musculus OX=10090 GN=Vps26a PE=1 SV=1
2956	TRUE	Q5DU31|ICEF1_MOUSE	35.98	6.65	2	2		348.153	314.615	461.344	374.704	81.5343	90.7196	80.7216	84.3252	0.225045	0.00284954	45812	Interactor protein for cytohesin exchange factors 1 OS=Mus musculus OX=10090 GN=Ipcef1 PE=1 SV=2
1570	TRUE	Q8VBY2|KKCC1_MOUSE	20.8	10.69	4	4		1325.29	1176.58	1456.92	1319.59	876.442	638.713	794.077	769.744	0.583319	0.00676078	55838	Calcium/calmodulin-dependent protein kinase kinase 1 OS=Mus musculus OX=10090 GN=Camkk1 PE=1 SV=1
725	TRUE	P02535|K1C10_MOUSE	1.57	9.82	12	8		226982	227097	224556	226212	226832	226690	226178	226567	1.00157	0.698407	57770	Keratin, type I cytoskeletal 10 OS=Mus musculus OX=10090 GN=Krt10 PE=1 SV=3
1160	TRUE	P62141|PP1B_MOUSE	33.02	15.9	7	4	Acetylation (Protein N-term); Oxidation (M)	2834.61	2715.55	3624.4	3058.19	1171.94	1189.88	1215.1	1192.31	0.389873	0.0028307	37187	Serine/threonine-protein phosphatase PP1-beta catalytic subunit OS=Mus musculus OX=10090 GN=Ppp1cb PE=1 SV=3
1413	TRUE	Q8BXZ1|TMX3_MOUSE	54.78	14.04	6	6	N-ethylmaleimide on cysteines	7037.71	6570.69	6657.28	6755.23	3105.44	3084.67	3063.93	3084.68	0.456636	1.4043e-05	51848	Protein disulfide-isomerase TMX3 OS=Mus musculus OX=10090 GN=Tmx3 PE=1 SV=2
1627	TRUE	P99026|PSB4_MOUSE	41.73	15.91	4	4		2214.71	2192.09	2187.07	2197.96	1229.71	1120.69	1255.68	1202.03	0.546884	1.91431e-05	29116	Proteasome subunit beta type-4 OS=Mus musculus OX=10090 GN=Psmb4 PE=1 SV=1
796	TRUE	Q80U93|NU214_MOUSE	4.89	3.79	7	7		3919.44	3428.58	2864.55	3404.19	2839.29	3156.59	3102.74	3032.87	0.890923	0.310625	212979	Nuclear pore complex protein Nup214 OS=Mus musculus OX=10090 GN=Nup214 PE=1 SV=2
1311	TRUE	P25444|RS2_MOUSE	47.1	26.28	7	7		8556.44	7910	8076.24	8180.89	4618.47	4693.1	4663.69	4658.42	0.569426	5.52411e-05	31231	40S ribosomal protein S2 OS=Mus musculus OX=10090 GN=Rps2 PE=1 SV=3
736	TRUE	Q7TMK9|HNRPQ_MOUSE	27.12	14.13	9	9		3935.9	3958.36	4510.76	4135.01	2276.44	2744.74	2443.66	2488.28	0.601759	0.00210176	69633	Heterogeneous nuclear ribonucleoprotein Q OS=Mus musculus OX=10090 GN=Syncrip PE=1 SV=2
1852	TRUE	P62900|RL31_MOUSE	13.4	38.4	5	5		3837.44	3169.4	3827.95	3611.6	2730.85	2829.19	1986.14	2515.39	0.696477	0.0339194	14463	60S ribosomal protein L31 OS=Mus musculus OX=10090 GN=Rpl31 PE=1 SV=1
57	TRUE	A2AAE1|BLTP1_MOUSE	0.67	5.81	26	26		5728.99	4052.53	5682.4	5154.64	5732.12	3897.81	6606.49	5412.14	1.04995	0.803771	555365	Bridge-like lipid transfer protein family member 1 OS=Mus musculus OX=10090 GN=Bltp1 PE=1 SV=4
2386	TRUE	O09172|GSH0_MOUSE	3.37	10.22	2	2		409.894	381.249	264.533	351.892	412.108	414.743	347.066	391.306	1.112	0.471815	30535	Glutamate--cysteine ligase regulatory subunit OS=Mus musculus OX=10090 GN=Gclm PE=1 SV=1
237	TRUE	P05202|AATM_MOUSE	23.04	39.53	19	19	Oxidation (M)	111774	81910.5	107891	100525	57543.5	57628.9	56957	57376.5	0.570767	0.010019	47411	Aspartate aminotransferase, mitochondrial OS=Mus musculus OX=10090 GN=Got2 PE=1 SV=1
3166	TRUE	Q9D328|NACHO_MOUSE	3.08	5.39	1	1		306.969	229.512	188.1	241.527	326.194	131.008	151.034	202.745	0.839431	0.614489	18505	Novel acetylcholine receptor chaperone OS=Mus musculus OX=10090 GN=Tmem35a PE=1 SV=1
3323	TRUE	Q8BXA0|LRFN5_MOUSE	3.7	1.39	1	1		80.5702	86.4007	72.4677	79.8128	182.133	67.8401	90.0269	113.333	1.41999	0.395162	79371	Leucine-rich repeat and fibronectin type-III domain-containing protein 5 OS=Mus musculus OX=10090 GN=Lrfn5 PE=1 SV=1
813	FALSE	Q149T7|PPM1J_MOUSE	29.99	1.78	1	1		1104.09	1173.97	1137.98	1138.68	528.825	633.568	668.292	610.229	0.535909	0.000342443	55550	Protein phosphatase 1J OS=Mus musculus OX=10090 GN=Ppm1j PE=1 SV=1
216	TRUE	P38647|GRP75_MOUSE	49.04	41.38	26	25		11538.2	12352.2	12511.4	12134	5852.04	5883.63	6053.24	5929.64	0.488681	3.57533e-05	73461	Stress-70 protein, mitochondrial OS=Mus musculus OX=10090 GN=Hspa9 PE=1 SV=3
3350	TRUE	P46414|CDN1B_MOUSE	8.31	6.6	1	1		123.576	86.1165	74.5724	94.7548	18.6569	55.0931	68.689	47.4797	0.501079	0.0877411	22193	Cyclin-dependent kinase inhibitor 1B OS=Mus musculus OX=10090 GN=Cdkn1b PE=1 SV=2
357	TRUE	Q9R111|GUAD_MOUSE	47.82	42.73	19	19	Oxidation (M)	30524	32389.2	31082.6	31331.9	15190	14171.1	13936.3	14432.5	0.460632	1.49708e-05	51013	Guanine deaminase OS=Mus musculus OX=10090 GN=Gda PE=1 SV=1
1053	TRUE	P11352|GPX1_MOUSE	15.03	41.79	8	8		7401.82	7110.56	7225.17	7245.85	6463.14	5597.77	6477.36	6179.43	0.852823	0.0244446	22298	Glutathione peroxidase 1 OS=Mus musculus OX=10090 GN=Gpx1 PE=1 SV=2
1478	TRUE	Q9JMK2|KC1E_MOUSE	4.67	6.49	5	2		252.781	304.067	215.339	257.396	250.78	211.295	216.516	226.197	0.878792	0.3358	47322	Casein kinase I isoform epsilon OS=Mus musculus OX=10090 GN=Csnk1e PE=1 SV=2
22	TRUE	Q9EPN1|NBEA_MOUSE	8.81	16.93	51	47	Oxidation (M)	3525.18	3158.75	3073.56	3252.5	3572.02	3410.82	3665.88	3549.57	1.09134	0.131951	326743	Neurobeachin OS=Mus musculus OX=10090 GN=Nbea PE=1 SV=1
581	TRUE	Q5DQR4|STB5L_MOUSE	16.05	13.92	14	13		2104.19	2316.61	2301.14	2240.65	1923.79	1610.62	1866.34	1800.25	0.803452	0.0202972	131844	Syntaxin-binding protein 5-like OS=Mus musculus OX=10090 GN=Stxbp5l PE=1 SV=1
270	TRUE	P62737|ACTA_MOUSE	32.54	2.92	17	1		1620.69	1770.46	1786.76	1725.97	234.982	196.737	369.01	266.91	0.154644	3.96659e-05	42009	Actin, aortic smooth muscle OS=Mus musculus OX=10090 GN=Acta2 PE=1 SV=1
2110	TRUE	Q61165|SL9A1_MOUSE	14.27	1.46	1	1		2441.01	2380.32	1967.1	2262.81	1888.36	1691.62	1791.49	1790.49	0.791269	0.0413904	91468	Sodium/hydrogen exchanger 1 OS=Mus musculus OX=10090 GN=Slc9a1 PE=1 SV=1
579	FALSE	Q811J3|IREB2_MOUSE	31.9	0.83	1	1		870.841	827.835	757.421	818.699	505.976	521.774	544.868	524.206	0.640291	0.00108437	104920	Iron-responsive element-binding protein 2 OS=Mus musculus OX=10090 GN=Ireb2 PE=1 SV=2
1237	TRUE	O88448|KLC2_MOUSE	8.59	9.35	7	6		764.624	728.832	510.78	668.079	454.82	559.838	257.113	423.924	0.634541	0.109539	66662	Kinesin light chain 2 OS=Mus musculus OX=10090 GN=Klc2 PE=1 SV=1
3798	TRUE	Q9CPQ8|ATP5L_MOUSE	9.25	8.74	1	1		781.867	370.647	477.585	543.366	293.045	333.282	365.147	330.491	0.608229	0.163608	11425	ATP synthase subunit g, mitochondrial OS=Mus musculus OX=10090 GN=Atp5mg PE=1 SV=1
2654	TRUE	P70670|NACAM_MOUSE	30.51	1.87	3	3		20851.9	16095.4	15338.1	17428.5	5689.95	5989.77	7045.05	6241.59	0.358126	0.00323216	220499	Nascent polypeptide-associated complex subunit alpha, muscle-specific form OS=Mus musculus OX=10090 GN=Naca PE=1 SV=2
952	TRUE	Q91VR2|ATPG_MOUSE	61.27	30.54	9	9	Oxidation (M)	25951	25004.5	24833.1	25262.9	11715.4	11788.2	11886.7	11796.8	0.46696	2.76123e-06	32886	ATP synthase subunit gamma, mitochondrial OS=Mus musculus OX=10090 GN=Atp5f1c PE=1 SV=1
1161	TRUE	Q80X80|C2C2L_MOUSE	30.47	16.43	7	7		1461.36	1696.21	1590.83	1582.8	889.91	927.767	1016.06	944.58	0.596778	0.00118671	76329	Phospholipid transfer protein C2CD2L OS=Mus musculus OX=10090 GN=C2cd2l PE=1 SV=3
3158	TRUE	Q8K012|FBP1L_MOUSE	5.62	3.14	2	2		308.689	247.534	322.113	292.779	250.197	277.422	102.105	209.908	0.716952	0.233553	69885	Formin-binding protein 1-like OS=Mus musculus OX=10090 GN=Fnbp1l PE=1 SV=2
1495	TRUE	P53026|RL10A_MOUSE	25.08	26.27	7	7		4418.68	6200.44	6212.83	5610.65	2182.42	2723.63	2224.82	2376.96	0.423651	0.0064769	24916	60S ribosomal protein L10a OS=Mus musculus OX=10090 GN=Rpl10a PE=1 SV=3
3136	TRUE	Q8BTV1|TUSC3_MOUSE	16.74	2.88	1	1		200.8	242.263	370.335	271.133	116.347	114.318	148.788	126.484	0.466504	0.0503662	39548	Tumor suppressor candidate 3 OS=Mus musculus OX=10090 GN=Tusc3 PE=1 SV=1
441	TRUE	Q8R1A4|DOCK7_MOUSE	0.27	2.77	6	6		453.15	868.008	739.161	686.773	723.388	554.607	688.435	655.477	0.95443	0.825452	241438	Dedicator of cytokinesis protein 7 OS=Mus musculus OX=10090 GN=Dock7 PE=1 SV=3
774	TRUE	P20060|HEXB_MOUSE	29.48	19.03	10	10		2708.88	2698.18	2363.62	2590.22	1433.87	1154.84	1125.11	1237.94	0.477927	0.000839643	61116	Beta-hexosaminidase subunit beta OS=Mus musculus OX=10090 GN=Hexb PE=1 SV=2
607	FALSE	Q9EP71|RAI14_MOUSE	12.19	0.72	1	1		996.291	555.902	762.426	771.54	314.528	501.215	471.689	429.144	0.556218	0.0704859	108852	Ankycorbin OS=Mus musculus OX=10090 GN=Rai14 PE=1 SV=1
1967	TRUE	Q9Z1W9|STK39_MOUSE	30.38	6.12	3	3		1001.44	883.154	993.714	959.436	595.278	515.187	580.956	563.807	0.587644	0.000960937	60320	STE20/SPS1-related proline-alanine-rich protein kinase OS=Mus musculus OX=10090 GN=Stk39 PE=1 SV=1
1277	TRUE	O88712|CTBP1_MOUSE	43.97	21.54	9	9	Acetylation (Protein N-term)	11510.8	12633.9	11774.3	11973	6269.82	6504.31	6139.07	6304.4	0.526551	9.04313e-05	47745	C-terminal-binding protein 1 OS=Mus musculus OX=10090 GN=Ctbp1 PE=1 SV=2
2815	TRUE	Q7TPD3|ROBO2_MOUSE	1.02	1.22	1	1		95.6334	58.6463	49.3388	67.8728	76.9266	54.073	54.677	61.8922	0.911885	0.72774	161190	Roundabout homolog 2 OS=Mus musculus OX=10090 GN=Robo2 PE=1 SV=2
437	TRUE	Q99PU5|ACBG1_MOUSE	26.73	28.43	16	16		4011.71	4764.07	4027.55	4267.78	2317.26	2445.94	2744.61	2502.6	0.586395	0.00317731	80426	Long-chain-fatty-acid--CoA ligase ACSBG1 OS=Mus musculus OX=10090 GN=Acsbg1 PE=1 SV=1
2515	TRUE	Q62446|FKBP3_MOUSE	12.79	3.57	1	1		295.662	379.448	281.679	318.93	239.32	210.703	256.864	235.629	0.738812	0.0669801	25148	Peptidyl-prolyl cis-trans isomerase FKBP3 OS=Mus musculus OX=10090 GN=Fkbp3 PE=1 SV=2
3635	TRUE	Q8VBV7|CSN8_MOUSE	16.81	7.18	1	1		143.754	191.51	287.14	207.468	87.7331	102.169	89.2448	93.049	0.448498	0.0541826	23256	COP9 signalosome complex subunit 8 OS=Mus musculus OX=10090 GN=Cops8 PE=1 SV=1
3978	TRUE	Q8BU14|SEC62_MOUSE	2.56	2.01	1	1		143.32	125.088	105.604	124.671	149.684	110.855	147.079	135.873	1.08985	0.536845	45581	Translocation protein SEC62 OS=Mus musculus OX=10090 GN=Sec62 PE=1 SV=1
1385	TRUE	Q9R1V4|ADA11_MOUSE	42.91	10.48	6	6		6154.52	5842.12	5899.84	5965.49	1621.18	1258.28	1324.51	1401.32	0.234905	6.44226e-06	84134	Disintegrin and metalloproteinase domain-containing protein 11 OS=Mus musculus OX=10090 GN=Adam11 PE=1 SV=2
632	TRUE	O89053|COR1A_MOUSE	44.65	27.77	13	12		29327.5	29669.2	27475.1	28823.9	15241.3	15890.3	14850.8	15327.5	0.531763	5.48744e-05	50989	Coronin-1A OS=Mus musculus OX=10090 GN=Coro1a PE=1 SV=5
309	TRUE	P97445|CAC1A_MOUSE	0.42	4.43	11	10		2415.77	1887.6	2077.86	2127.08	1791.3	2406.23	2295.77	2164.43	1.01756	0.885869	267647	Voltage-dependent P/Q-type calcium channel subunit alpha-1A OS=Mus musculus OX=10090 GN=Cacna1a PE=1 SV=2
1941	TRUE	Q8K2C6|SIR5_MOUSE	17.35	13.87	4	4		1810.56	1578.01	1610.75	1666.44	863.971	755.98	387.647	669.199	0.401574	0.00349102	34134	NAD-dependent protein deacylase sirtuin-5, mitochondrial OS=Mus musculus OX=10090 GN=Sirt5 PE=1 SV=1
1206	TRUE	Q64525|H2B2B_MOUSE	38.61	5.56	6	1		805.324	779.561	752.187	779.024	405.198	427.735	370.338	401.091	0.514863	7.59052e-05	13920	Histone H2B type 2-B OS=Mus musculus OX=10090 GN=Hist2h2bb PE=1 SV=3
876	TRUE	Q8VE33|GD1L1_MOUSE	13.39	30.27	10	10		2634.6	4628.32	3630.36	3631.09	2411.59	2102.44	1791.06	2101.7	0.578806	0.0641661	42318	Ganglioside-induced differentiation-associated protein 1-like 1 OS=Mus musculus OX=10090 GN=Gdap1l1 PE=1 SV=1
1818	TRUE	P14206|RSSA_MOUSE	33.15	19.66	5	5	Acetylation (Protein N-term)	4585.33	4106.83	4677.76	4456.64	1780.5	1292.32	1586.7	1553.17	0.348508	0.000214627	32838	40S ribosomal protein SA OS=Mus musculus OX=10090 GN=Rpsa PE=1 SV=4
454	TRUE	Q8K394|PLCL2_MOUSE	31.62	9.31	11	10		2294.17	2424.42	2291.8	2336.79	1425.37	1639.45	1536.84	1533.89	0.656407	0.000448881	125772	Inactive phospholipase C-like protein 2 OS=Mus musculus OX=10090 GN=Plcl2 PE=1 SV=2
2970	TRUE	Q9D0W5|PPIL1_MOUSE	22.61	18.67	2	2		300.128	358.605	296.302	318.345	226.648	192.341	196.509	205.166	0.644478	0.00777337	18237	Peptidyl-prolyl cis-trans isomerase-like 1 OS=Mus musculus OX=10090 GN=Ppil1 PE=1 SV=1
570	TRUE	P27659|RL3_MOUSE	17.27	20.35	9	9		8886.98	9365.8	9230.96	9161.25	8515.17	8085.3	8526.51	8375.66	0.914249	0.0181381	46110	60S ribosomal protein L3 OS=Mus musculus OX=10090 GN=Rpl3 PE=1 SV=3
3064	TRUE	Q9JHG6|RCAN1_MOUSE	57.32	5.18	1	1		242.054	193.209	157.35	197.538	18.6569	18.6569	18.6569	18.6569	0.094447	0.00188485	28137	Calcipressin-1 OS=Mus musculus OX=10090 GN=Rcan1 PE=1 SV=2
832	TRUE	Q9QUP5|HPLN1_MOUSE	38.79	23.03	11	10		6717.77	6665.09	7127.01	6836.62	4364.08	4197.11	3981.54	4180.91	0.611546	0.00013175	40478	Hyaluronan and proteoglycan link protein 1 OS=Mus musculus OX=10090 GN=Hapln1 PE=1 SV=1
2352	TRUE	Q61584|FXR1_MOUSE	16.29	1.18	2	1		197.283	284.853	317.052	266.396	153.962	161.827	126.813	147.534	0.553813	0.0333864	76222	RNA-binding protein FXR1 OS=Mus musculus OX=10090 GN=Fxr1 PE=1 SV=2
1331	TRUE	P30999|CTND1_MOUSE	14.96	2.24	2	2		468.811	718.725	635.845	607.793	426.743	365.726	334.51	375.66	0.618071	0.0414033	104925	Catenin delta-1 OS=Mus musculus OX=10090 GN=Ctnnd1 PE=1 SV=2
1399	TRUE	Q812E0|CPEB2_MOUSE	6.83	4.03	3	2		435.026	304.426	524.877	421.443	327.84	190.96	356.096	291.632	0.691984	0.18785	58442	Cytoplasmic polyadenylation element-binding protein 2 OS=Mus musculus OX=10090 GN=Cpeb2 PE=1 SV=1
3865	TRUE	Q2TA57|ASPH1_MOUSE	2.01	3.89	1	1		74.1807	94.2757	77.7429	82.0664	78.5638	84.3436	71.5429	78.1501	0.952279	0.615985	38266	Aspartate beta-hydroxylase domain-containing protein 1 OS=Mus musculus OX=10090 GN=Asphd1 PE=2 SV=2
2271	TRUE	Q9QYF1|RDH11_MOUSE	12.26	4.11	1	1		176.965	157.648	112.623	149.079	113.291	93.3068	84.0678	96.8885	0.649916	0.0671586	35148	Retinol dehydrogenase 11 OS=Mus musculus OX=10090 GN=Rdh11 PE=1 SV=2
1581	TRUE	Q7TNG5|EMAL2_MOUSE	12.02	9.71	5	5		1082.39	893.818	1040.38	1005.53	540.368	878.97	655.065	691.468	0.687665	0.0519863	70734	Echinoderm microtubule-associated protein-like 2 OS=Mus musculus OX=10090 GN=Eml2 PE=1 SV=1
1814	TRUE	Q9D6Y7|MSRA_MOUSE	36.06	16.31	3	3		868.403	907.601	741.282	839.096	310.66	322.995	359.211	330.955	0.394419	0.000626903	25988	Mitochondrial peptide methionine sulfoxide reductase OS=Mus musculus OX=10090 GN=Msra PE=1 SV=1
1151	TRUE	P24288|BCAT1_MOUSE	34.6	18.13	6	6		4602.79	4410.5	4554.47	4522.59	1354.01	1597.86	1858.25	1603.38	0.354526	4.87764e-05	42791	Branched-chain-amino-acid aminotransferase, cytosolic OS=Mus musculus OX=10090 GN=Bcat1 PE=1 SV=2
677	TRUE	P19783|COX41_MOUSE	49.03	46.15	7	7	Oxidation (M)	22083.7	21640.4	21323.9	21682.7	9084.91	9991.08	9818.21	9631.4	0.444198	4.46944e-06	19530	Cytochrome c oxidase subunit 4 isoform 1, mitochondrial OS=Mus musculus OX=10090 GN=Cox4i1 PE=1 SV=2
730	FALSE	Q32MW3|ACO10_MOUSE	20.58	13.67	6	6		1441.32	1258.67	1388.81	1362.93	422.971	769.989	598.242	597.067	0.438076	0.00255145	50552	Acyl-coenzyme A thioesterase 10, mitochondrial OS=Mus musculus OX=10090 GN=Acot10 PE=2 SV=1
137	TRUE	P99024|TBB5_MOUSE	43.87	15.99	21	4	Oxidation (M)	113905	128740	117561	120068	56146.5	57045.2	58158.4	57116.7	0.475701	0.000151487	49671	Tubulin beta-5 chain OS=Mus musculus OX=10090 GN=Tubb5 PE=1 SV=1
3591	TRUE	Q9CQN6|TM14C_MOUSE	21.39	9.65	1	1		684.256	571.804	717.628	657.896	374.329	399.185	284.486	352.667	0.536052	0.00557871	11642	Transmembrane protein 14C OS=Mus musculus OX=10090 GN=Tmem14c PE=1 SV=1
3289	TRUE	Q9JKN6|NOVA1_MOUSE	29.25	2.37	1	1		266.516	349.337	206.47	274.108	63.3307	77.571	70.4034	70.435	0.256961	0.00808089	51755	RNA-binding protein Nova-1 OS=Mus musculus OX=10090 GN=Nova1 PE=1 SV=2
2579	TRUE	Q8R4G0|NTNG1_MOUSE	27.59	5.57	3	3		1379.25	1556.53	1418.63	1451.47	402.127	433.571	639.214	491.637	0.338716	0.000471554	60566	Netrin-G1 OS=Mus musculus OX=10090 GN=Ntng1 PE=1 SV=2
2093	FALSE	P61620|S61A1_MOUSE	7.19	4.2	2	2		550.484	734.799	776.077	687.12	574.579	606.672	524.029	568.427	0.827259	0.181182	52265	Protein transport protein Sec61 subunit alpha isoform 1 OS=Mus musculus OX=10090 GN=Sec61a1 PE=1 SV=2
1149	TRUE	Q60631|GRB2_MOUSE	22.62	34.1	8	8		3303.73	3932.22	3822.6	3686.19	1026.42	889.715	1735.81	1217.32	0.330237	0.00163163	25238	Growth factor receptor-bound protein 2 OS=Mus musculus OX=10090 GN=Grb2 PE=1 SV=1
3417	TRUE	Q7TNV0|DEK_MOUSE	8.32	3.42	1	1		173.608	91.7421	215.597	160.316	88.6182	99.2582	96.9656	94.9473	0.592252	0.147876	43159	Protein DEK OS=Mus musculus OX=10090 GN=Dek PE=1 SV=1
860	TRUE	P13020|GELS_MOUSE	18.84	10	8	8		2503.64	1630.89	2326.12	2153.55	1266.37	1152.73	1133.19	1184.1	0.549834	0.0228211	85942	Gelsolin OS=Mus musculus OX=10090 GN=Gsn PE=1 SV=3
1807	TRUE	Q9CPX6|ATG3_MOUSE	28.27	21.34	6	6	Acetylation (Protein N-term)	1754.85	2123.02	1795.18	1891.02	894.487	652.504	640.266	729.086	0.385552	0.00124722	35796	Ubiquitin-like-conjugating enzyme ATG3 OS=Mus musculus OX=10090 GN=Atg3 PE=1 SV=1
1786	FALSE	Q9DCD6|GBRAP_MOUSE	13.76	5.98	1	1		535.785	388.306	348.418	424.17	18.6569	164.496	239.362	140.838	0.332033	0.0304029	13918	Gamma-aminobutyric acid receptor-associated protein OS=Mus musculus OX=10090 GN=Gabarap PE=1 SV=2
688	TRUE	Q5SW19|CLU_MOUSE	6.86	5.7	7	7		1249.94	979.696	1077.51	1102.38	661.291	1168.8	719.587	849.894	0.77096	0.230648	148068	Clustered mitochondria protein homolog OS=Mus musculus OX=10090 GN=Cluh PE=1 SV=2
209	TRUE	Q9WUB3|PYGM_MOUSE	10.18	17.81	22	15	Acetylation (Protein N-term)	1328.1	1621.08	1140.15	1363.11	858.651	888.635	1213.11	986.797	0.72393	0.104982	97286	Glycogen phosphorylase, muscle form OS=Mus musculus OX=10090 GN=Pygm PE=1 SV=3
104	TRUE	Q8BRT1|CLAP2_MOUSE	36.92	26.13	30	28		4047.22	4005.84	3839.31	3964.12	2901.93	2922.92	3051.75	2958.87	0.746411	0.000219035	140739	CLIP-associating protein 2 OS=Mus musculus OX=10090 GN=Clasp2 PE=1 SV=1
2163	TRUE	Q9JM14|NT5C_MOUSE	26.85	13	3	3		1778.12	1669.06	1549.63	1665.6	366.801	485.404	230.171	360.792	0.216614	0.000191056	23076	5'(3')-deoxyribonucleotidase, cytosolic type OS=Mus musculus OX=10090 GN=Nt5c PE=1 SV=1
1228	TRUE	Q60854|SPB6_MOUSE	35.42	18.25	6	6		2294.07	1947.66	2097.53	2113.09	1201.03	1174.35	1202.6	1192.66	0.564415	0.000795729	42599	Serpin B6 OS=Mus musculus OX=10090 GN=Serpinb6 PE=1 SV=1
512	TRUE	Q9CZD3|GARS_MOUSE	23.03	16.87	13	13		2719.28	2685.11	3054.08	2819.49	1651.25	1515.02	1125.84	1430.7	0.507433	0.00211709	81878	Glycine--tRNA ligase OS=Mus musculus OX=10090 GN=Gars1 PE=1 SV=1
2872	TRUE	Q8K2M0|RM38_MOUSE	2.12	2.37	1	1		325.247	70.1732	579.326	324.915	146.308	170.367	187.432	168.036	0.517168	0.347353	45030	39S ribosomal protein L38, mitochondrial OS=Mus musculus OX=10090 GN=Mrpl38 PE=1 SV=2
1015	TRUE	Q8CJG0|AGO2_MOUSE	1.16	5.7	5	4		413.374	577.275	457.794	482.815	358.986	419.881	607.531	462.133	0.957164	0.82837	97304	Protein argonaute-2 OS=Mus musculus OX=10090 GN=Ago2 PE=1 SV=3
360	TRUE	P24527|LKHA4_MOUSE	2.12	24.06	12	12		4519.03	1511.04	1362.65	2464.24	1234.26	1866.07	2048.12	1716.15	0.696422	0.518326	69051	Leukotriene A-4 hydrolase OS=Mus musculus OX=10090 GN=Lta4h PE=1 SV=4
3738	TRUE	A2A935|PRD16_MOUSE	17.61	0.71	1	1		3172.6	3091.96	2416.64	2893.73	1719.88	1568	2097.57	1795.15	0.620358	0.0186025	140858	Histone-lysine N-methyltransferase PRDM16 OS=Mus musculus OX=10090 GN=Prdm16 PE=1 SV=1
2096	TRUE	Q9R1Q9|VAS1_MOUSE	19.38	3.02	2	2	Oxidation (M)	1681.06	2319.81	2123.74	2041.53	482.693	177.242	591.255	417.063	0.204289	0.00198278	51008	V-type proton ATPase subunit S1 OS=Mus musculus OX=10090 GN=Atp6ap1 PE=1 SV=1
3246	TRUE	Q02780|NFIA_MOUSE	10.76	2.07	1	1		125.401	90.0981	84.6685	100.056	74.8941	73.5602	75.1149	74.5231	0.744815	0.116365	58553	Nuclear factor 1 A-type OS=Mus musculus OX=10090 GN=Nfia PE=1 SV=1
1359	TRUE	Q60847|COCA1_MOUSE	12.54	1.44	4	4		585.632	362.072	685.885	544.53	299.529	334.889	201.858	278.759	0.511926	0.0623619	340214	Collagen alpha-1(XII) chain OS=Mus musculus OX=10090 GN=Col12a1 PE=2 SV=3
2453	TRUE	Q5SUF2|LC7L3_MOUSE	13.18	9.49	3	3		424.378	572.124	397.041	464.514	359.211	214.901	254.37	276.161	0.594516	0.0532381	51450	Luc7-like protein 3 OS=Mus musculus OX=10090 GN=Luc7l3 PE=1 SV=1
2726	TRUE	Q8BG94|COMD7_MOUSE	14.17	6	1	1		75.6453	109.705	88.171	91.1736	67.832	57.731	63.8033	63.1221	0.692328	0.0538151	22652	COMM domain-containing protein 7 OS=Mus musculus OX=10090 GN=Commd7 PE=1 SV=1
1236	TRUE	Q9WV60|GSK3B_MOUSE	17.18	11.9	6	4		2617.21	2274.71	2457.7	2449.87	1717.12	1820.6	1294.54	1610.75	0.657484	0.0113135	46710	Glycogen synthase kinase-3 beta OS=Mus musculus OX=10090 GN=Gsk3b PE=1 SV=2
1192	TRUE	Q9EP53|TSC1_MOUSE	12.82	0.86	1	1		133.245	126.993	80.5604	113.599	53.2016	74.8111	70.8716	66.2948	0.583584	0.0573905	128746	Hamartin OS=Mus musculus OX=10090 GN=Tsc1 PE=1 SV=1
1597	FALSE	Q8VCH0|THIKB_MOUSE	13.23	4.95	1	1		512.762	458.013	561.783	510.853	329.06	164.306	84.6838	192.683	0.37718	0.0150772	43995	3-ketoacyl-CoA thiolase B, peroxisomal OS=Mus musculus OX=10090 GN=Acaa1b PE=1 SV=1
1080	TRUE	Q8CI71|VPS50_MOUSE	1.61	5.91	5	5		536.805	452.982	1005.45	665.078	448.069	995.185	322.273	588.509	0.884872	0.789839	111174	Syndetin OS=Mus musculus OX=10090 GN=Vps50 PE=1 SV=2
1956	TRUE	Q99LE6|ABCF2_MOUSE	13.02	5.89	3	3		543.638	528.163	762.704	611.502	367.481	421.677	459.51	416.223	0.680657	0.0718454	71782	ATP-binding cassette sub-family F member 2 OS=Mus musculus OX=10090 GN=Abcf2 PE=1 SV=1
3016	TRUE	Q9QZ08|NAGK_MOUSE	19.75	2.92	1	1		255.501	227.781	244.368	242.55	192.858	154.32	177.168	174.782	0.720603	0.00795357	37268	N-acetyl-D-glucosamine kinase OS=Mus musculus OX=10090 GN=Nagk PE=1 SV=3
801	TRUE	Q9DCD0|6PGD_MOUSE	39.92	18.01	8	8		3460.03	3040.51	3383.11	3294.55	1541.32	1582.37	1673.41	1599.03	0.485357	0.000229425	53247	6-phosphogluconate dehydrogenase, decarboxylating OS=Mus musculus OX=10090 GN=Pgd PE=1 SV=3
3116	TRUE	P83887|TBG1_MOUSE	16.81	2.66	1	1		90.5175	92.5577	94.4372	92.5041	75.021	53.3278	51.1893	59.846	0.646955	0.0132277	51101	Tubulin gamma-1 chain OS=Mus musculus OX=10090 GN=Tubg1 PE=1 SV=1
883	TRUE	P97390|VPS45_MOUSE	33.87	8.25	5	5		698.608	770.014	692.152	720.258	375.236	368.873	425.798	389.969	0.541429	0.000426854	65053	Vacuolar protein sorting-associated protein 45 OS=Mus musculus OX=10090 GN=Vps45 PE=1 SV=1
2364	TRUE	Q91YP0|L2HDH_MOUSE	2.67	7.33	3	3		261.212	622.504	607.842	497.186	369.916	369.072	407.266	382.084	0.768494	0.387232	50899	L-2-hydroxyglutarate dehydrogenase, mitochondrial OS=Mus musculus OX=10090 GN=L2hgdh PE=1 SV=1
2484	TRUE	Q3TWL2|PP4P1_MOUSE	10.04	3.87	1	1		196.157	259.906	262.331	239.464	73.5389	202.876	123.944	133.453	0.557297	0.0711251	30047	Type 1 phosphatidylinositol 4,5-bisphosphate 4-phosphatase OS=Mus musculus OX=10090 GN=Pip4p1 PE=1 SV=1
646	TRUE	Q6ZQ08|CNOT1_MOUSE	3.25	1.52	4	4		301.003	264.476	242.219	269.233	300.37	318.61	252.116	290.365	1.07849	0.465325	266808	CCR4-NOT transcription complex subunit 1 OS=Mus musculus OX=10090 GN=Cnot1 PE=1 SV=2
846	TRUE	P55066|NCAN_MOUSE	30.74	8.12	10	10		3280.94	3160.48	3174.18	3205.2	1525.68	1922.09	1584.28	1677.35	0.523321	0.000293322	137200	Neurocan core protein OS=Mus musculus OX=10090 GN=Ncan PE=1 SV=1
2713	TRUE	O08997|ATOX1_MOUSE	42.77	32.35	2	2		2454.28	2443.62	2447.49	2448.46	549.192	650.828	706.455	635.492	0.259547	2.50763e-06	7338	Copper transport protein ATOX1 OS=Mus musculus OX=10090 GN=Atox1 PE=1 SV=1
446	TRUE	Q99JY9|ARP3_MOUSE	61.55	24.88	12	8		11529.8	11608.8	11504.3	11547.6	5615.12	5417.55	5653.82	5562.17	0.481672	1.87779e-07	47357	Actin-related protein 3 OS=Mus musculus OX=10090 GN=Actr3 PE=1 SV=3
1104	TRUE	Q9EPR5|SORC2_MOUSE	11.15	3.36	4	4		509.558	825.429	634.256	656.415	414.413	458.023	490.923	454.453	0.692326	0.0993781	128902	VPS10 domain-containing receptor SorCS2 OS=Mus musculus OX=10090 GN=Sorcs2 PE=1 SV=2
373	TRUE	P63101|1433Z_MOUSE	59.61	42.45	16	10	Acetylation (Protein N-term); Oxidation (M)	154578	153719	153028	153775	74064.5	77039.5	77501.8	76201.9	0.495541	3.06432e-07	27771	14-3-3 protein zeta/delta OS=Mus musculus OX=10090 GN=Ywhaz PE=1 SV=1
482	TRUE	Q80TR1|AGRL1_MOUSE	31.78	9.62	14	12		1273.67	1263.56	1180.26	1239.16	1850.96	1956.46	2142.25	1983.22	1.60046	0.00117512	161686	Adhesion G protein-coupled receptor L1 OS=Mus musculus OX=10090 GN=Adgrl1 PE=1 SV=2
2432	TRUE	Q9R099|TBL2_MOUSE	13.12	2.94	1	1		143.636	99.6376	177.625	140.299	57.6166	18.6569	72.0811	49.4515	0.352472	0.0303154	49584	Transducin beta-like protein 2 OS=Mus musculus OX=10090 GN=Tbl2 PE=1 SV=2
1787	TRUE	Q80YF9|RHG33_MOUSE	6	0.69	3	1		70.9155	102.569	80.8869	84.7903	113.694	102.269	86.6477	100.87	1.18964	0.257786	139801	Rho GTPase-activating protein 33 OS=Mus musculus OX=10090 GN=Arhgap33 PE=1 SV=1
1783	TRUE	Q9Z204|HNRPC_MOUSE	25.7	10.86	4	4		534.28	462.913	609.565	535.586	271.391	313.744	296.265	293.8	0.548559	0.00538343	34385	Heterogeneous nuclear ribonucleoproteins C1/C2 OS=Mus musculus OX=10090 GN=Hnrnpc PE=1 SV=1
2468	FALSE	Q8VCR2|DHB13_MOUSE	2.49	2.63	1	1		251.468	259.293	159.083	223.281	1050.23	999.928	60.0932	703.416	3.15036	0.21203	33458	17-beta-hydroxysteroid dehydrogenase 13 OS=Mus musculus OX=10090 GN=Hsd17b13 PE=1 SV=2
2125	TRUE	Q80ZW2|THEM6_MOUSE	8.54	14.98	3	3		642.975	613.313	681.988	646.092	586.35	515.794	323.058	475.067	0.735293	0.102808	23803	Protein THEM6 OS=Mus musculus OX=10090 GN=Them6 PE=1 SV=1
576	TRUE	O70589|CSKP_MOUSE	22.99	12.74	11	11		3032.13	3450.62	3141.12	3207.96	2032.62	1424.54	1437.02	1631.39	0.508546	0.00263448	105109	Peripheral plasma membrane protein CASK OS=Mus musculus OX=10090 GN=Cask PE=1 SV=2
2930	TRUE	Q9QZ73|DCNL1_MOUSE	11.59	3.09	1	1		101.932	156.326	171.262	143.173	80.6911	88.1276	104.045	90.9545	0.635276	0.0780036	30097	DCN1-like protein 1 OS=Mus musculus OX=10090 GN=Dcun1d1 PE=2 SV=1
712	TRUE	Q99PU8|DHX30_MOUSE	3.97	3.7	4	4		645.747	432.387	411.736	496.623	304.094	584.517	314.574	401.061	0.807577	0.464853	136668	ATP-dependent RNA helicase DHX30 OS=Mus musculus OX=10090 GN=Dhx30 PE=1 SV=1
3036	TRUE	Q9CQU3|RER1_MOUSE	9.6	5.61	1	1		195.175	142.6	123.517	153.764	130.56	96.8754	75.2493	100.895	0.656165	0.119754	22988	Protein RER1 OS=Mus musculus OX=10090 GN=Rer1 PE=1 SV=1
3145	TRUE	O35083|PLCA_MOUSE	19.64	6.32	2	2		981.305	919.248	812.693	904.415	121.426	363.418	128.68	204.508	0.226122	0.00170295	31709	1-acyl-sn-glycerol-3-phosphate acyltransferase alpha OS=Mus musculus OX=10090 GN=Agpat1 PE=1 SV=1
2493	TRUE	Q64444|CAH4_MOUSE	5.15	7.87	2	2		482.675	352.653	476.569	437.299	407.601	384.377	348.948	380.309	0.869677	0.280083	34351	Carbonic anhydrase 4 OS=Mus musculus OX=10090 GN=Ca4 PE=1 SV=1
3243	TRUE	Q3V3V9|CARL2_MOUSE	3.75	0.85	1	1		83.9037	68.7859	79.2381	77.3092	61.7188	82.1462	68.5763	70.8138	0.915981	0.434373	141372	Capping protein, Arp2/3 and myosin-I linker protein 2 OS=Mus musculus OX=10090 GN=Carmil2 PE=1 SV=2
389	TRUE	O35136|NCAM2_MOUSE	34	27.84	18	18	Oxidation (M)	3599.25	3041.31	3691.69	3444.08	6677.51	6756.6	7040.35	6824.82	1.98161	0.000127008	93204	Neural cell adhesion molecule 2 OS=Mus musculus OX=10090 GN=Ncam2 PE=1 SV=1
803	TRUE	Q9EQZ7|RIMS2_MOUSE	0.51	4.64	6	5		378.531	2787.09	456	1207.21	370.819	325.941	2639.17	1111.98	0.921115	0.935111	172863	Regulating synaptic membrane exocytosis protein 2 OS=Mus musculus OX=10090 GN=Rims2 PE=1 SV=1
1017	TRUE	Q9D1A2|CNDP2_MOUSE	15.74	23.16	9	9		3612.15	2779.3	2876.05	3089.17	1551.43	2220.73	1263.43	1678.53	0.543359	0.0218186	52767	Cytosolic non-specific dipeptidase OS=Mus musculus OX=10090 GN=Cndp2 PE=1 SV=1
101	TRUE	Q9JI18|LRP1B_MOUSE	44.67	5.78	25	24		14117.8	14722.8	13763.2	14201.3	9427.81	9269.44	9411.61	9369.62	0.659773	7.06005e-05	513634	Low-density lipoprotein receptor-related protein 1B OS=Mus musculus OX=10090 GN=Lrp1b PE=1 SV=1
1391	TRUE	A2A432|CUL4B_MOUSE	21.86	2.37	4	2		271.655	297.39	263.948	277.664	106.051	165.392	102.296	124.579	0.448669	0.00256143	110699	Cullin-4B OS=Mus musculus OX=10090 GN=Cul4b PE=1 SV=1
2083	TRUE	P63216|GBG3_MOUSE	8.33	22.67	2	2		1041.02	1546.55	331.189	972.919	442.46	140.828	369.57	317.62	0.32646	0.146206	8305	Guanine nucleotide-binding protein G(I)/G(S)/G(O) subunit gamma-3 OS=Mus musculus OX=10090 GN=Gng3 PE=1 SV=1
510	TRUE	Q8K4G5|ABLM1_MOUSE	37.6	19.51	16	15		4909.47	5357.3	5174.04	5146.94	2495.02	2414.42	2099.98	2336.47	0.453954	9.24735e-05	96805	Actin-binding LIM protein 1 OS=Mus musculus OX=10090 GN=Ablim1 PE=1 SV=1
553	TRUE	P14685|PSMD3_MOUSE	23.77	20.38	11	11		1350.31	1491.14	1502.64	1448.03	1023.15	837.811	792.888	884.618	0.610911	0.00278479	60718	26S proteasome non-ATPase regulatory subunit 3 OS=Mus musculus OX=10090 GN=Psmd3 PE=1 SV=3
1024	TRUE	Q9Z0J4|NOS1_MOUSE	4.42	2.66	4	4		316.375	326.062	452.789	365.075	335.091	255.39	344.182	311.555	0.853398	0.363325	160472	Nitric oxide synthase, brain OS=Mus musculus OX=10090 GN=Nos1 PE=1 SV=1
420	TRUE	Q9Z2Q6|SEPT5_MOUSE	39.84	36.31	17	16	Oxidation (M)	31209.6	30680.2	29392	30427.2	18067.7	16271.6	17679	17339.5	0.569866	6.93376e-05	42748	Septin-5 OS=Mus musculus OX=10090 GN=Septin5 PE=1 SV=2
1490	TRUE	Q99LI8|HGS_MOUSE	26.84	6.32	5	5		5304.65	4863.05	4418.53	4862.08	2258.87	2871.03	2248.62	2459.51	0.505855	0.00185489	86015	Hepatocyte growth factor-regulated tyrosine kinase substrate OS=Mus musculus OX=10090 GN=Hgs PE=1 SV=2
956	TRUE	Q8K183|PDXK_MOUSE	35.91	24.36	7	7		19101.9	19900.4	19231.3	19411.2	7836.3	8694.52	9781.03	8770.62	0.451833	6.53607e-05	35015	Pyridoxal kinase OS=Mus musculus OX=10090 GN=Pdxk PE=1 SV=1
1695	TRUE	Q62059|CSPG2_MOUSE	30.73	1.4	4	4		2166.16	2391.28	2534.41	2363.95	833.466	1001.07	1121.52	985.352	0.416825	0.00053142	366787	Versican core protein OS=Mus musculus OX=10090 GN=Vcan PE=1 SV=2
1262	TRUE	Q9CRY7|GDPD1_MOUSE	31.4	21.02	6	6		1339.87	1401.7	1491.48	1411.02	716.272	593.374	747.681	685.776	0.486015	0.000355317	35867	Lysophospholipase D GDPD1 OS=Mus musculus OX=10090 GN=Gdpd1 PE=1 SV=1
432	TRUE	Q3U0V1|FUBP2_MOUSE	45.52	28.88	17	16		5518.01	5324.99	5894.62	5579.2	2628	2454.78	2462.28	2515.02	0.450784	6.46952e-05	76775	Far upstream element-binding protein 2 OS=Mus musculus OX=10090 GN=Khsrp PE=1 SV=2
2056	TRUE	Q9JLK7|CABP1_MOUSE	18.13	8.37	2	2		111.061	96.6398	144.884	117.528	61.4001	74.4962	68.6893	68.1952	0.580244	0.0289596	25943	Calcium-binding protein 1 OS=Mus musculus OX=10090 GN=Cabp1 PE=1 SV=3
1616	TRUE	Q8R3Z5|CACB1_MOUSE	7.18	1.84	5	1		166.82	154.95	97.0906	139.62	204.247	146.547	239.59	196.795	1.4095	0.174078	65486	Voltage-dependent L-type calcium channel subunit beta-1 OS=Mus musculus OX=10090 GN=Cacnb1 PE=1 SV=1
1872	TRUE	Q9ERS2|NDUAD_MOUSE	23.01	28.47	4	4		8216.51	8080.63	6887.69	7728.28	3210.4	3432.72	4692.82	3778.64	0.488937	0.00321702	16860	NADH dehydrogenase [ubiquinone] 1 alpha subcomplex subunit 13 OS=Mus musculus OX=10090 GN=Ndufa13 PE=1 SV=3
2090	TRUE	Q6P5F7|TTYH3_MOUSE	8.44	6.68	3	3		471.19	486.157	464.071	473.806	464.865	678.499	649.4	597.588	1.26125	0.139307	57714	Protein tweety homolog 3 OS=Mus musculus OX=10090 GN=Ttyh3 PE=1 SV=1
1740	TRUE	B2RXS4|PLXB2_MOUSE	7.71	0.6	2	1		173.161	18.6569	18.6569	70.1583	86.0523	117.519	96.4925	100.021	1.42565	0.59873	206230	Plexin-B2 OS=Mus musculus OX=10090 GN=Plxnb2 PE=1 SV=1
1329	TRUE	P54285|CACB3_MOUSE	20.69	2.48	4	1		73.16	77.2526	76.8697	75.7608	64.3813	67.5324	61.0026	64.3054	0.848796	0.00751297	54572	Voltage-dependent L-type calcium channel subunit beta-3 OS=Mus musculus OX=10090 GN=Cacnb3 PE=1 SV=2
2687	TRUE	Q8BK08|TMM11_MOUSE	3.99	17.37	3	3		951.479	830.568	1144.12	975.389	1173.71	2155.37	824.684	1384.59	1.41952	0.373348	21312	Transmembrane protein 11, mitochondrial OS=Mus musculus OX=10090 GN=Tmem11 PE=1 SV=1
925	TRUE	P62334|PRS10_MOUSE	20.71	21.59	8	8		1602.46	1708.81	1435.53	1582.27	473.394	839.158	731.632	681.394	0.430645	0.00258888	44173	26S proteasome regulatory subunit 10B OS=Mus musculus OX=10090 GN=Psmc6 PE=1 SV=1
790	TRUE	P63037|DNJA1_MOUSE	44.67	31.74	10	10		9852.51	8805.86	9420.78	9359.72	3818.2	4108.87	3748.83	3891.97	0.415821	7.14742e-05	44868	DnaJ homolog subfamily A member 1 OS=Mus musculus OX=10090 GN=Dnaja1 PE=1 SV=1
1567	TRUE	P62281|RS11_MOUSE	49.7	26.58	7	7		10682.4	10409.2	10044.3	10378.6	5840.65	5798.5	5613.28	5750.81	0.554102	1.96989e-05	18431	40S ribosomal protein S11 OS=Mus musculus OX=10090 GN=Rps11 PE=1 SV=3
296	FALSE	P00342|LDHC_MOUSE	61.71	2.71	1	1		19442.3	19500.9	19393.6	19445.6	12864.9	12859.3	12574.3	12766.2	0.656506	3.1136e-07	35912	L-lactate dehydrogenase C chain OS=Mus musculus OX=10090 GN=Ldhc PE=1 SV=2
2799	TRUE	O88851|RBBP9_MOUSE	11.37	13.44	2	2		277.032	413.316	462.021	384.123	635.774	565.035	502.991	567.933	1.47852	0.0524895	20912	Putative hydrolase RBBP9 OS=Mus musculus OX=10090 GN=Rbbp9 PE=1 SV=2
786	TRUE	P09405|NUCL_MOUSE	28.86	11.46	8	8		2277.94	1990.1	2025.67	2097.91	1251.26	1283.31	1076.86	1203.81	0.573813	0.00129037	76723	Nucleolin OS=Mus musculus OX=10090 GN=Ncl PE=1 SV=2
2245	TRUE	O08914|FAAH1_MOUSE	30.31	5.35	3	3		640.935	715.216	747.617	701.256	467.498	458.123	470.741	465.454	0.663743	0.00176579	63221	Fatty-acid amide hydrolase 1 OS=Mus musculus OX=10090 GN=Faah PE=1 SV=1
1694	TRUE	Q60900|ELAV3_MOUSE	16.53	3	6	1		428.26	545.808	417.811	463.96	276.293	352.808	272.227	300.443	0.647562	0.02835	39533	ELAV-like protein 3 OS=Mus musculus OX=10090 GN=Elavl3 PE=1 SV=1
3196	TRUE	P49446|PTPRE_MOUSE	7.26	1.14	2	1		563.718	527.962	465.571	519.084	559.286	281.23	301.092	380.536	0.733092	0.214666	80688	Receptor-type tyrosine-protein phosphatase epsilon OS=Mus musculus OX=10090 GN=Ptpre PE=1 SV=3
3199	TRUE	Q8C129|LCAP_MOUSE	15.03	0.78	1	1		2423.88	2298.38	1664.89	2129.05	1272.92	1184.8	696.21	1051.31	0.493793	0.0218361	117304	Leucyl-cystinyl aminopeptidase OS=Mus musculus OX=10090 GN=Lnpep PE=1 SV=1
2819	TRUE	Q3TZ89|SC31B_MOUSE	2.72	0.6	1	1		295.374	271.697	292.995	286.689	168.306	373.303	233.111	258.24	0.900768	0.66503	125633	Protein transport protein Sec31B OS=Mus musculus OX=10090 GN=Sec31b PE=1 SV=2
1357	FALSE	O35316|SC6A6_MOUSE	27.18	1.45	1	1		3863.28	4090.71	3860.62	3938.2	2771.07	3123.17	2973.06	2955.77	0.750537	0.00152032	69856	Sodium- and chloride-dependent taurine transporter OS=Mus musculus OX=10090 GN=Slc6a6 PE=1 SV=2
1465	TRUE	P20108|PRDX3_MOUSE	31.98	24.12	6	6		6467.86	8200.12	7035.94	7234.64	3479.2	3595.65	3226.61	3433.82	0.474636	0.00188157	28127	Thioredoxin-dependent peroxide reductase, mitochondrial OS=Mus musculus OX=10090 GN=Prdx3 PE=1 SV=1
1671	TRUE	B1AY10|NFX1_MOUSE	30.69	1.89	2	2		585.346	483.719	562.462	543.843	193.852	244.426	180.262	206.18	0.379117	0.000754899	123811	Transcriptional repressor NF-X1 OS=Mus musculus OX=10090 GN=Nfx1 PE=1 SV=1
2170	TRUE	Q8C5H8|NAKD2_MOUSE	8.52	6.64	2	2		389.231	225.139	336.213	316.861	232.704	224.458	228.811	228.658	0.721635	0.142521	50859	NAD kinase 2, mitochondrial OS=Mus musculus OX=10090 GN=Nadk2 PE=1 SV=2
2033	TRUE	P28741|KIF3A_MOUSE	9.83	2.14	1	1		44.421	95.1654	66.5025	68.6963	18.6569	55.3703	18.6569	30.8947	0.449728	0.119191	80170	Kinesin-like protein KIF3A OS=Mus musculus OX=10090 GN=Kif3a PE=1 SV=2
2293	TRUE	Q9DB73|NB5R1_MOUSE	26.84	11.48	4	4		806.996	954.531	733.537	831.688	368.593	457.389	404.472	410.151	0.493155	0.00381283	34135	NADH-cytochrome b5 reductase 1 OS=Mus musculus OX=10090 GN=Cyb5r1 PE=1 SV=1
1909	TRUE	Q80U19|DAAM2_MOUSE	6.51	0.72	1	1		18.6569	57.1271	18.6569	31.4803	67.7316	18.6569	46.1388	44.1758	1.40328	0.543289	128370	Disheveled-associated activator of morphogenesis 2 OS=Mus musculus OX=10090 GN=Daam2 PE=1 SV=4
1493	TRUE	P0C192|LRC4B_MOUSE	14.62	6.49	4	4		603.384	419.055	551.891	524.777	327.227	325.834	197.751	283.604	0.540428	0.025814	76156	Leucine-rich repeat-containing protein 4B OS=Mus musculus OX=10090 GN=Lrrc4b PE=1 SV=1
1247	TRUE	P97300|NPTN_MOUSE	57.18	21.16	8	8		35878.8	34319.1	34535.8	34911.2	18598.4	18205.5	18443.3	18415.8	0.527502	5.07417e-06	44373	Neuroplastin OS=Mus musculus OX=10090 GN=Nptn PE=1 SV=3
3167	TRUE	P63168|DYL1_MOUSE	30.3	7.87	2	1		10640.2	10665.3	10543.2	10616.3	4057.51	3585.12	5135	4259.21	0.401197	0.000159111	10366	Dynein light chain 1, cytoplasmic OS=Mus musculus OX=10090 GN=Dynll1 PE=1 SV=1
1453	TRUE	G5E870|TRIPC_MOUSE	8.74	0.44	1	1		110.466	125.55	131.489	122.502	113.636	110.83	98.1329	107.533	0.877809	0.129858	224128	E3 ubiquitin-protein ligase TRIP12 OS=Mus musculus OX=10090 GN=Trip12 PE=1 SV=1
2576	TRUE	Q8BIJ7|RUFY1_MOUSE	9.8	1.54	2	1		95.7869	65.0536	70.9114	77.2506	18.6569	66.4126	18.6569	34.5755	0.447575	0.0822967	80376	RUN and FYVE domain-containing protein 1 OS=Mus musculus OX=10090 GN=Rufy1 PE=1 SV=1
399	TRUE	Q922B2|SYDC_MOUSE	9.88	39.92	18	18		2956.9	3710.19	3135.31	3267.47	1344.87	2784.02	2212.45	2113.78	0.646916	0.0725168	57147	Aspartate--tRNA ligase, cytoplasmic OS=Mus musculus OX=10090 GN=Dars1 PE=1 SV=2
2659	TRUE	P10639|THIO_MOUSE	47.85	31.43	3	3		24094.1	26525.2	26874.8	25831.3	7849.78	8719.24	8401.18	8323.4	0.322221	4.31285e-05	11675	Thioredoxin OS=Mus musculus OX=10090 GN=Txn PE=1 SV=3
849	TRUE	P35700|PRDX1_MOUSE	35.33	43.72	11	10	Oxidation (M)	30089.7	30980.6	30239.1	30436.5	16051.3	16786.3	13934.3	15590.6	0.512235	7.84621e-05	22176	Peroxiredoxin-1 OS=Mus musculus OX=10090 GN=Prdx1 PE=1 SV=1
2134	TRUE	Q60749|KHDR1_MOUSE	22.82	7.67	3	3		2140.67	2619.32	2136.2	2298.73	1207.79	1329.49	934.03	1157.1	0.503366	0.00452525	48371	KH domain-containing, RNA-binding, signal transduction-associated protein 1 OS=Mus musculus OX=10090 GN=Khdrbs1 PE=1 SV=2
3471	TRUE	P99027|RLA2_MOUSE	22.97	13.91	1	1		119.159	161.852	179.397	153.469	39.2922	46.5355	66.9479	50.9252	0.331826	0.00650492	11651	60S acidic ribosomal protein P2 OS=Mus musculus OX=10090 GN=Rplp2 PE=1 SV=3
3137	TRUE	Q61271|ACV1B_MOUSE	10.91	2.97	1	1		75.8884	131.205	131.895	112.996	57.0948	78.3053	70.2483	68.5494	0.606654	0.0854809	56700	Activin receptor type-1B OS=Mus musculus OX=10090 GN=Acvr1b PE=1 SV=1
52	TRUE	D3YZU1|SHAN1_MOUSE	19.89	18.87	36	33	Oxidation (M)	4907.62	3925.57	4800.76	4544.65	6352.36	6153.26	6327.6	6277.74	1.38135	0.00546434	226317	SH3 and multiple ankyrin repeat domains protein 1 OS=Mus musculus OX=10090 GN=Shank1 PE=1 SV=1
1915	TRUE	Q3UJD6|UBP19_MOUSE	7.94	0.88	1	1		189.716	575.771	145.235	303.574	134.944	97.1365	128.899	120.327	0.396366	0.252618	150549	Ubiquitin carboxyl-terminal hydrolase 19 OS=Mus musculus OX=10090 GN=Usp19 PE=1 SV=1
853	TRUE	Q925I1|ATAD3_MOUSE	33.57	7.95	5	5		135340	122346	123134	126940	76659.7	76751	83940.9	79117.2	0.623264	0.000592771	66742	ATPase family AAA domain-containing protein 3 OS=Mus musculus OX=10090 GN=Atad3 PE=1 SV=1
3879	TRUE	P00416|COX3_MOUSE	19.18	5.36	1	1		15236.6	10379.8	13399	13005.1	7029.44	6619.1	8255.23	7301.26	0.561413	0.0190056	29923	Cytochrome c oxidase subunit 3 OS=Mus musculus OX=10090 GN=mt-Co3 PE=1 SV=2
4039	TRUE	P14602|HSPB1_MOUSE	55.12	4.31	1	1		156.965	240.383	241.917	213.088	18.6569	18.6569	18.6569	18.6569	0.0875547	0.00227881	23014	Heat shock protein beta-1 OS=Mus musculus OX=10090 GN=Hspb1 PE=1 SV=3
218	TRUE	Q8R0S2|IQEC1_MOUSE	4.29	24.25	26	23		4963.84	5978.01	5963.31	5635.05	2865.25	6311.75	4760.81	4645.93	0.824471	0.400164	108015	IQ motif and SEC7 domain-containing protein 1 OS=Mus musculus OX=10090 GN=Iqsec1 PE=1 SV=2
2877	TRUE	Q99KV1|DJB11_MOUSE	18.37	3.07	1	1		316.75	232.624	405.088	318.154	155.2	160.309	163.243	159.584	0.501595	0.033498	40555	DnaJ homolog subfamily B member 11 OS=Mus musculus OX=10090 GN=Dnajb11 PE=1 SV=1
2384	TRUE	P26883|FKB1A_MOUSE	21.94	25	2	2		5389.45	6728.21	7052.16	6389.94	1111.25	1210.62	2539.33	1620.4	0.253586	0.00225144	11923	Peptidyl-prolyl cis-trans isomerase FKBP1A OS=Mus musculus OX=10090 GN=Fkbp1a PE=1 SV=2
3176	TRUE	Q9D0L7|ARM10_MOUSE	5.86	2.94	1	1		205.822	143.715	161.714	170.417	200.218	262.939	172.443	211.867	1.24323	0.271311	33311	Armadillo repeat-containing protein 10 OS=Mus musculus OX=10090 GN=Armc10 PE=1 SV=1
2661	TRUE	Q62348|TSN_MOUSE	26.58	4.39	1	1		706.529	630.379	571.362	636.09	111.939	125.221	215.481	150.88	0.237199	0.000675159	26201	Translin OS=Mus musculus OX=10090 GN=Tsn PE=1 SV=1
265	TRUE	P60843|IF4A1_MOUSE	24.19	18.72	19	9		2558.28	3502.24	3917.47	3326	1402.75	1534.99	1230.37	1389.37	0.417732	0.00928047	46154	Eukaryotic initiation factor 4A-I OS=Mus musculus OX=10090 GN=Eif4a1 PE=1 SV=1
1816	TRUE	P35282|RAB21_MOUSE	16.76	28.83	6	6	Acetylation (Protein N-term)	952.77	1196.86	1119.49	1089.71	785.918	748.083	875.612	803.204	0.737082	0.0244029	24106	Ras-related protein Rab-21 OS=Mus musculus OX=10090 GN=Rab21 PE=1 SV=4
1102	TRUE	Q8K2C9|HACD3_MOUSE	24.63	22.38	8	8		3731.81	3935.02	3543.82	3736.88	2239.62	2116.07	2668.42	2341.37	0.626557	0.00229944	43131	Very-long-chain (3R)-3-hydroxyacyl-CoA dehydratase 3 OS=Mus musculus OX=10090 GN=Hacd3 PE=1 SV=2
242	TRUE	P02468|LAMC1_MOUSE	9.45	12.51	19	19		2687.66	2529.37	2522.73	2579.92	2321.99	2323.86	2544.21	2396.69	0.928977	0.115372	177298	Laminin subunit gamma-1 OS=Mus musculus OX=10090 GN=Lamc1 PE=1 SV=2
1569	TRUE	O54781|SRPK2_MOUSE	9.49	7.64	5	5		729.879	699.605	449.943	626.476	460.736	458.499	292.854	404.03	0.644925	0.100771	76757	SRSF protein kinase 2 OS=Mus musculus OX=10090 GN=Srpk2 PE=1 SV=2
2374	TRUE	Q9ERG2|STRN3_MOUSE	2.26	3.77	3	2		1552.66	764.324	1611.47	1309.49	1067.27	1037.12	1132.19	1078.86	0.82388	0.448169	87150	Striatin-3 OS=Mus musculus OX=10090 GN=Strn3 PE=1 SV=1
1250	TRUE	Q8CH77|NAV1_MOUSE	3.6	0.43	2	1		123.315	104.736	188.214	138.755	113.674	199.465	213.109	175.416	1.26421	0.412424	202368	Neuron navigator 1 OS=Mus musculus OX=10090 GN=Nav1 PE=1 SV=2
1158	TRUE	Q9WU60|ATRN_MOUSE	5.32	2.45	3	3		559.983	472.745	337.232	456.653	409.92	369.274	326.969	368.721	0.807442	0.272044	158058	Attractin OS=Mus musculus OX=10090 GN=Atrn PE=1 SV=3
2548	TRUE	Q9D8S9|BOLA1_MOUSE	9.79	12.41	1	1		133.495	97.8265	77.3544	102.892	51.7266	18.6569	68.1008	46.1614	0.44864	0.0608147	14379	BolA-like protein 1 OS=Mus musculus OX=10090 GN=Bola1 PE=1 SV=1
3728	TRUE	Q9D3B1|HACD2_MOUSE	22.17	4.72	1	1		155.124	151.902	134.857	147.294	84.0899	54.3869	76.1777	71.5515	0.485772	0.00223888	28402	Very-long-chain (3R)-3-hydroxyacyl-CoA dehydratase 2 OS=Mus musculus OX=10090 GN=Hacd2 PE=1 SV=1
1141	TRUE	P59325|IF5_MOUSE	23.88	16.08	7	7		2226.1	2082.61	2163.23	2157.31	626.959	975.959	501.627	701.515	0.32518	0.000596888	48968	Eukaryotic translation initiation factor 5 OS=Mus musculus OX=10090 GN=Eif5 PE=1 SV=1
3793	TRUE	Q9DBZ5|EIF3K_MOUSE	33.98	5.05	1	1		971.789	952.269	736.905	886.988	164.834	234.593	174.679	191.369	0.215752	0.000888937	25087	Eukaryotic translation initiation factor 3 subunit K OS=Mus musculus OX=10090 GN=Eif3k PE=1 SV=1
2108	TRUE	Q921H9|COA7_MOUSE	36.28	17.32	4	4	Acetylation (Protein N-term)	1885.26	1749.93	1741.96	1792.39	600.43	637.577	769.966	669.324	0.373426	8.5052e-05	25617	Cytochrome c oxidase assembly factor 7 OS=Mus musculus OX=10090 GN=Coa7 PE=1 SV=1
1876	TRUE	Q9QZB7|ARP10_MOUSE	15.32	8.87	4	4		765.456	789.25	997.448	850.718	528.749	666.09	483.741	559.527	0.657711	0.0338539	46208	Actin-related protein 10 OS=Mus musculus OX=10090 GN=Actr10 PE=1 SV=2
3322	TRUE	Q9JM93|AR6P4_MOUSE	0.49	5.24	1	1		97.8566	97.0102	88.0344	94.3004	72.9609	102.349	119.382	98.2306	1.04168	0.791649	25525	ADP-ribosylation factor-like protein 6-interacting protein 4 OS=Mus musculus OX=10090 GN=Arl6ip4 PE=1 SV=1
1645	TRUE	Q8K386|RAB15_MOUSE	4.84	23.58	4	3		638.069	411.979	288.759	446.269	283.805	347.915	346.049	325.923	0.730328	0.313342	24318	Ras-related protein Rab-15 OS=Mus musculus OX=10090 GN=Rab15 PE=1 SV=1
2178	TRUE	Q14BB9|MA6D1_MOUSE	15.86	16.75	2	2		1248.55	1198.13	939.241	1128.64	826.514	744.971	603.126	724.871	0.642251	0.0252849	20433	MAP6 domain-containing protein 1 OS=Mus musculus OX=10090 GN=Map6d1 PE=1 SV=1
2114	TRUE	Q08274|DMWD_MOUSE	6.97	2.56	1	1		81.9917	75.8387	137.842	98.5574	131.646	122.711	126.131	126.83	1.28686	0.228308	69816	Dystrophia myotonica WD repeat-containing protein OS=Mus musculus OX=10090 GN=Dmwd PE=1 SV=3
3001	TRUE	Q6P542|ABCF1_MOUSE	6.66	1.19	1	1		68.5484	47.3811	94.971	70.3002	65.1047	135.824	150.657	117.195	1.66707	0.190309	94945	ATP-binding cassette sub-family F member 1 OS=Mus musculus OX=10090 GN=Abcf1 PE=1 SV=1
3278	TRUE	Q8VCE6|NT5M_MOUSE	23.23	4.55	1	1		144.46	214.503	170.996	176.653	87.4789	68.8052	85.0066	80.4303	0.455301	0.0105749	25602	5'(3')-deoxyribonucleotidase, mitochondrial OS=Mus musculus OX=10090 GN=Nt5m PE=1 SV=1
737	TRUE	Q61414|K1C15_MOUSE	53.07	8.85	12	3		299.092	551.672	465.819	438.861	18.6569	18.6569	18.6569	18.6569	0.042512	0.00478137	49138	Keratin, type I cytoskeletal 15 OS=Mus musculus OX=10090 GN=Krt15 PE=1 SV=2
2269	TRUE	Q9DCT1|AKCL2_MOUSE	8.9	10.96	4	3		3963.25	4443.72	4792.17	4399.71	2218.18	4417.97	2294.14	2976.76	0.676581	0.134445	34461	1,5-anhydro-D-fructose reductase OS=Mus musculus OX=10090 GN=Akr1e2 PE=1 SV=1
2222	TRUE	O08663|MAP2_MOUSE	15.49	3.97	2	2		226.738	275.557	392.958	298.418	164.134	143.744	180.202	162.693	0.545186	0.0546172	52922	Methionine aminopeptidase 2 OS=Mus musculus OX=10090 GN=Metap2 PE=1 SV=1
2773	TRUE	Q9QYK7|RNF11_MOUSE	35.18	13.64	2	2		1492.31	1290.7	1438.48	1407.17	663.533	705.18	597.126	655.28	0.465674	0.000380156	17458	RING finger protein 11 OS=Mus musculus OX=10090 GN=Rnf11 PE=1 SV=1
2691	TRUE	Q9D379|HYEP_MOUSE	7.28	1.98	1	1		122.155	71.4964	129.106	107.585	73.1823	80.2652	77.444	76.9639	0.715374	0.169073	52577	Epoxide hydrolase 1 OS=Mus musculus OX=10090 GN=Ephx1 PE=1 SV=2
2923	TRUE	A2AL36|CNTRL_MOUSE	1.15	0.56	1	1		3068.11	3480.84	2996.31	3181.75	3276.38	3298.94	3105.35	3226.89	1.01419	0.795424	268880	Centriolin OS=Mus musculus OX=10090 GN=Cntrl PE=1 SV=2
2343	TRUE	Q9CR26|VTA1_MOUSE	13.29	8.74	3	3		893.728	886.366	689.792	823.295	291.379	469.213	590.149	450.247	0.546884	0.0271013	33913	Vacuolar protein sorting-associated protein VTA1 homolog OS=Mus musculus OX=10090 GN=Vta1 PE=1 SV=1
546	FALSE	Q6P8J7|KCRS_MOUSE	46.32	3.82	2	2	Oxidation (M)	1919.22	1948.62	1875.43	1914.42	964.415	888.747	870.104	907.755	0.474167	9.54808e-06	47473	Creatine kinase S-type, mitochondrial OS=Mus musculus OX=10090 GN=Ckmt2 PE=1 SV=1
936	TRUE	Q9Z1S5|SEPT3_MOUSE	26.85	28.57	10	10		14077.4	14057.7	15118.9	14418	8180.87	8238.36	6298.92	7572.71	0.525227	0.000709783	40038	Neuronal-specific septin-3 OS=Mus musculus OX=10090 GN=Septin3 PE=1 SV=2
882	TRUE	P23242|CXA1_MOUSE	22.35	33.25	10	10	Oxidation (M)	5693.18	7108.6	5817.52	6206.43	3743.76	3802.38	2970.07	3505.4	0.564801	0.00681559	43004	Gap junction alpha-1 protein OS=Mus musculus OX=10090 GN=Gja1 PE=1 SV=2
1757	TRUE	Q9QUI0|RHOA_MOUSE	28.67	6.22	3	1		2016.37	2464.96	2320.42	2267.25	846.658	724.252	1043.14	871.349	0.38432	0.000986873	21782	Transforming protein RhoA OS=Mus musculus OX=10090 GN=Rhoa PE=1 SV=1
1549	FALSE	Q9CWH6|PSMA8_MOUSE	21.51	15.6	3	3		3562.42	3975.98	2891.92	3476.77	1338.63	1897.78	1167.92	1468.11	0.422262	0.00644898	27866	Proteasome subunit alpha type-8 OS=Mus musculus OX=10090 GN=Psma8 PE=1 SV=1
2035	TRUE	P63325|RS10_MOUSE	25.73	14.55	3	3		713.978	561.834	977.369	751.06	189.375	130.865	211.99	177.41	0.236213	0.00976982	18916	40S ribosomal protein S10 OS=Mus musculus OX=10090 GN=Rps10 PE=1 SV=1
1679	FALSE	P30115|GSTA3_MOUSE	18.55	3.62	1	1		428.16	502.18	539.112	489.817	284.093	169.478	135.423	196.331	0.400826	0.006158	25361	Glutathione S-transferase A3 OS=Mus musculus OX=10090 GN=Gsta3 PE=1 SV=2
2390	TRUE	P68433|H31_MOUSE	31	16.91	3	3		89763.8	89018.6	81256.2	86679.5	56045.4	52252.1	47817.9	52038.5	0.600355	0.000661118	15404	Histone H3.1 OS=Mus musculus OX=10090 GN=H3c1 PE=1 SV=2
122	TRUE	Q60864|STIP1_MOUSE	21.08	48.99	28	28	Acetylation (Protein N-term); Oxidation (M)	21749.2	22205.4	17152.1	20368.9	6829.53	10511.3	10294	9211.63	0.45224	0.0051232	62582	Stress-induced-phosphoprotein 1 OS=Mus musculus OX=10090 GN=Stip1 PE=1 SV=1
305	TRUE	A2RSJ4|BLT3B_MOUSE	0.43	15.17	18	18		1321.36	1439.3	1242.92	1334.53	1144.52	1628	1323.49	1365.34	1.02309	0.84949	161940	Bridge-like lipid transfer protein family member 3B OS=Mus musculus OX=10090 GN=Bltp3b PE=1 SV=2
4220	TRUE	Q3UEB3|PUF60_MOUSE	3.42	2.84	1	1		71.4379	113.448	185.857	123.581	133.162	149.968	150.65	144.593	1.17003	0.568958	60249	Poly(U)-binding-splicing factor PUF60 OS=Mus musculus OX=10090 GN=Puf60 PE=1 SV=2
2236	TRUE	P63073|IF4E_MOUSE	46.04	16.59	4	4		2382.63	2417.32	2393.57	2397.84	1837.6	1834.12	1771.6	1814.44	0.756697	1.63288e-05	25053	Eukaryotic translation initiation factor 4E OS=Mus musculus OX=10090 GN=Eif4e PE=1 SV=1
2316	TRUE	P83882|RL36A_MOUSE	19.16	24.53	4	4		1671.2	1342.33	1588.25	1533.93	993.973	1171.29	987.192	1050.82	0.685051	0.0139622	12441	60S ribosomal protein L36a OS=Mus musculus OX=10090 GN=Rpl36a PE=1 SV=2
565	TRUE	P47757|CAPZB_MOUSE	53.23	37.55	11	11	Oxidation (M)	18069.4	17591.9	17223.5	17628.2	10052.6	10156.7	9830.12	10013.2	0.568018	8.48736e-06	31345	F-actin-capping protein subunit beta OS=Mus musculus OX=10090 GN=Capzb PE=1 SV=3
1325	TRUE	Q8BWG8|ARRB1_MOUSE	12.7	11.96	5	5		1019.78	1227.43	838.474	1028.56	499.316	625.96	803.717	642.998	0.625143	0.0542014	46973	Beta-arrestin-1 OS=Mus musculus OX=10090 GN=Arrb1 PE=1 SV=1
3061	TRUE	P85094|ISC2A_MOUSE	10.9	3.88	1	1		256.701	263.319	173.315	231.111	123.865	190.96	129.492	148.106	0.640842	0.0827848	22417	Isochorismatase domain-containing protein 2A OS=Mus musculus OX=10090 GN=Isoc2a PE=1 SV=1
1222	TRUE	Q9R1C6|DGKE_MOUSE	5.33	11.35	6	6		1473.51	1754.45	1614.3	1614.09	1225.83	1341.81	1701.71	1423.12	0.881684	0.310553	63635	Diacylglycerol kinase epsilon OS=Mus musculus OX=10090 GN=Dgke PE=1 SV=1
362	TRUE	P11798|KCC2A_MOUSE	49.84	25.52	17	13	Oxidation (M)	168015	165890	167680	167195	94730.1	100649	99743.3	98374.2	0.58838	3.88827e-06	54115	Calcium/calmodulin-dependent protein kinase type II subunit alpha OS=Mus musculus OX=10090 GN=Camk2a PE=1 SV=2
945	TRUE	O08795|GLU2B_MOUSE	44.16	17.27	10	10		4809.72	4857.78	5008.83	4892.11	1564.67	1263.54	1374.92	1401.04	0.286389	5.14977e-06	58793	Glucosidase 2 subunit beta OS=Mus musculus OX=10090 GN=Prkcsh PE=1 SV=1
186	FALSE	P21550|ENOB_MOUSE	47.79	3.23	2	1	Oxidation (M)	7621.05	7627.12	7577.85	7608.67	3002.68	3384.58	3254.7	3213.99	0.422411	2.62768e-06	47025	Beta-enolase OS=Mus musculus OX=10090 GN=Eno3 PE=1 SV=3
329	TRUE	Q9JLM8|DCLK1_MOUSE	46.15	28.97	20	17		9179.68	9353.4	9545.94	9359.67	5155.67	5466.49	5541.71	5387.96	0.575657	1.50904e-05	84153	Serine/threonine-protein kinase DCLK1 OS=Mus musculus OX=10090 GN=Dclk1 PE=1 SV=1
2180	TRUE	Q8R3T5|STXB6_MOUSE	16.06	4.29	1	1		182.336	222.583	184.008	196.309	144.024	132.301	160.034	145.453	0.74094	0.0299194	23671	Syntaxin-binding protein 6 OS=Mus musculus OX=10090 GN=Stxbp6 PE=1 SV=1
2800	TRUE	Q9QY06|MYO9B_MOUSE	10.54	0.47	1	1		1936.1	1849.23	2000.27	1928.53	1221.23	212.762	44.9743	492.989	0.255629	0.0178317	238834	Unconventional myosin-IXb OS=Mus musculus OX=10090 GN=Myo9b PE=1 SV=2
2141	FALSE	P63034|CYH2_MOUSE	13.87	4.75	2	2		364.751	540.382	476.853	460.662	307.581	308.988	338.741	318.437	0.691259	0.053128	46571	Cytohesin-2 OS=Mus musculus OX=10090 GN=Cyth2 PE=1 SV=3
985	TRUE	Q3UM45|PP1R7_MOUSE	42.45	22.16	7	7		1551.08	1695.95	1437.4	1561.48	571.844	566.947	516.16	551.65	0.353288	0.000194281	41292	Protein phosphatase 1 regulatory subunit 7 OS=Mus musculus OX=10090 GN=Ppp1r7 PE=1 SV=2
1231	TRUE	P58771|TPM1_MOUSE	1.87	3.87	9	2		93.8439	188.408	81.967	121.406	145.539	139.446	106.904	130.63	1.07597	0.809126	32681	Tropomyosin alpha-1 chain OS=Mus musculus OX=10090 GN=Tpm1 PE=1 SV=1
2651	TRUE	Q9JHW4|SELB_MOUSE	0.77	2.23	1	1		91.6125	60.2536	77.2002	76.3555	80.6927	80.7562	71.1529	77.5339	1.01543	0.908294	63539	Selenocysteine-specific elongation factor OS=Mus musculus OX=10090 GN=Eefsec PE=1 SV=2
1802	TRUE	Q8K3Z9|PO121_MOUSE	6.27	2.83	3	3		456.866	311.651	308.718	359.078	580.644	728.107	325.058	544.603	1.51667	0.219306	121022	Nuclear envelope pore membrane protein POM 121 OS=Mus musculus OX=10090 GN=Pom121 PE=1 SV=2
1460	TRUE	Q9CZT8|RAB3B_MOUSE	12.74	12.79	4	2		1554.46	1508.96	1833.01	1632.14	1087.93	489.183	983.553	853.554	0.522966	0.0208951	24757	Ras-related protein Rab-3B OS=Mus musculus OX=10090 GN=Rab3b PE=1 SV=1
505	TRUE	P20152|VIME_MOUSE	9.83	32.4	16	14		2504.27	2105.32	1961.68	2190.42	992.903	1742.62	1714	1483.17	0.677117	0.0739807	53688	Vimentin OS=Mus musculus OX=10090 GN=Vim PE=1 SV=3
2482	TRUE	P35290|RAB24_MOUSE	13.59	16.75	3	3		591.633	442.732	425.542	486.636	355.558	269.412	350.525	325.165	0.66819	0.0537439	23144	Ras-related protein Rab-24 OS=Mus musculus OX=10090 GN=Rab24 PE=1 SV=2
2053	TRUE	Q3UGR5|HDHD2_MOUSE	26.38	6.56	2	2		1331.75	1493.41	1229.84	1351.66	495.288	284.403	438.485	406.059	0.300414	0.000678504	28730	Haloacid dehalogenase-like hydrolase domain-containing protein 2 OS=Mus musculus OX=10090 GN=Hdhd2 PE=1 SV=2
871	TRUE	Q99L13|3HIDH_MOUSE	42.23	33.73	9	9	Oxidation (M)	2982.45	3028.37	3042.19	3017.67	1202.43	1267.39	1059.97	1176.6	0.389904	8.61663e-06	35440	3-hydroxyisobutyrate dehydrogenase, mitochondrial OS=Mus musculus OX=10090 GN=Hibadh PE=1 SV=1
2540	TRUE	Q8R4F1|NTNG2_MOUSE	24.63	3.57	2	2		953.068	699.147	657.678	769.965	345.51	380.186	369.8	365.165	0.474262	0.0120875	66166	Netrin-G2 OS=Mus musculus OX=10090 GN=Ntng2 PE=1 SV=2
3256	TRUE	Q9EQU5|SET_MOUSE	6.03	3.46	1	1		202.35	172.23	227.179	200.586	113.286	77.31	234.049	141.548	0.705672	0.303056	33378	Protein SET OS=Mus musculus OX=10090 GN=Set PE=1 SV=1
1484	FALSE	Q05144|RAC2_MOUSE	6.61	6.25	3	1		1984.19	1770.23	1599.27	1784.56	1656.48	1653.58	1519.63	1609.9	0.902125	0.21969	21441	Ras-related C3 botulinum toxin substrate 2 OS=Mus musculus OX=10090 GN=Rac2 PE=1 SV=1
2508	TRUE	O08915|AIP_MOUSE	22.21	13.94	3	3		772.028	882.528	637.396	763.984	379.346	264.589	218.607	287.514	0.376335	0.00507846	37605	AH receptor-interacting protein OS=Mus musculus OX=10090 GN=Aip PE=1 SV=1
1741	TRUE	Q3U5Q7|CMPK2_MOUSE	14.38	14.77	5	5		1303.6	1247.04	1235.7	1262.11	660.457	613.726	1045.87	773.351	0.612742	0.0242678	50036	UMP-CMP kinase 2, mitochondrial OS=Mus musculus OX=10090 GN=Cmpk2 PE=1 SV=2
2228	TRUE	P63030|MPC1_MOUSE	25.03	15.6	3	3		4314.02	3528.41	4662.79	4168.41	2162.98	2382.07	2438.98	2328.01	0.558489	0.00600026	12455	Mitochondrial pyruvate carrier 1 OS=Mus musculus OX=10090 GN=Mpc1 PE=1 SV=1
1027	TRUE	Q8CBY8|DCTN4_MOUSE	40.17	23.77	9	9	Acetylation (Protein N-term)	3867.48	4053.62	3920.67	3947.25	1487.35	1471.94	1756.11	1571.8	0.398201	2.49124e-05	53057	Dynactin subunit 4 OS=Mus musculus OX=10090 GN=Dctn4 PE=1 SV=1
3647	TRUE	Q8R4T9|UT2_MOUSE	1.35	0.86	1	1		388.332	351.378	252.048	330.586	251.245	332.571	549.415	377.744	1.14265	0.655036	102047	Urea transporter 2 OS=Mus musculus OX=10090 GN=Slc14a2 PE=1 SV=2
1936	TRUE	Q8CH72|TRI32_MOUSE	4.08	5.04	3	3		638.821	385.057	507.537	510.472	534.102	395.062	329.188	419.45	0.821692	0.392055	72057	E3 ubiquitin-protein ligase TRIM32 OS=Mus musculus OX=10090 GN=Trim32 PE=1 SV=2
125	TRUE	Q9CS84|NRX1A_MOUSE	23.54	15.98	24	20	Oxidation (M)	4871.21	4857.57	4599.33	4776.04	3027.53	3709.57	3324.62	3353.91	0.702237	0.00277151	166169	Neurexin-1 OS=Mus musculus OX=10090 GN=Nrxn1 PE=1 SV=3
2162	TRUE	Q99JW1|AB17A_MOUSE	17.74	9.35	3	3		329.135	393.392	460.203	394.243	706.043	607.715	945.508	753.089	1.91021	0.0286443	33950	Alpha/beta hydrolase domain-containing protein 17A OS=Mus musculus OX=10090 GN=Abhd17a PE=1 SV=1
200	TRUE	P70175|DLG3_MOUSE	13.47	35.22	28	28		11443.2	7849.76	10484.3	9925.77	7482.59	4029.82	3881.11	5131.17	0.516955	0.0395714	93482	Disks large homolog 3 OS=Mus musculus OX=10090 GN=Dlg3 PE=1 SV=1
1360	TRUE	Q8BHZ0|CYRIA_MOUSE	34.98	17.96	7	5		3926.86	3741.26	3799.13	3822.42	1577.3	1850.32	1441.19	1622.94	0.424584	7.64421e-05	37343	CYFIP-related Rac1 interactor A OS=Mus musculus OX=10090 GN=Cyria PE=1 SV=1
1841	TRUE	Q91VZ6|SMAP1_MOUSE	22.14	8.18	4	3		4443.14	3781.92	4250.39	4158.48	2035.89	2031.41	1269.22	1778.84	0.427762	0.00178094	47660	Stromal membrane-associated protein 1 OS=Mus musculus OX=10090 GN=Smap1 PE=1 SV=1
507	TRUE	Q9DC07|LNEBL_MOUSE	52.8	48.52	14	14	Oxidation (M)	7661.81	7718.76	7760.51	7713.69	3308.05	3199.59	3016.7	3174.78	0.411577	9.12704e-07	31113	LIM zinc-binding domain-containing Nebulette OS=Mus musculus OX=10090 GN=Nebl PE=1 SV=1
1276	FALSE	Q8BVP5|KC1G2_MOUSE	1.69	5.3	6	2		229.676	162.596	162.282	184.851	196.576	173.749	210.832	193.719	1.04797	0.739519	47582	Casein kinase I isoform gamma-2 OS=Mus musculus OX=10090 GN=Csnk1g2 PE=1 SV=1
1265	TRUE	Q9JLZ3|AUHM_MOUSE	44.27	19.75	6	6		4168.07	4169.86	4002.9	4113.61	1590.9	1808.71	1792.5	1730.7	0.420727	1.17192e-05	33395	Methylglutaconyl-CoA hydratase, mitochondrial OS=Mus musculus OX=10090 GN=Auh PE=1 SV=1
933	FALSE	O35945|AL1A7_MOUSE	20.55	2	3	1		108.393	129.899	121.4	119.897	18.6569	55.1608	37.6338	37.1505	0.309853	0.00250934	54588	Aldehyde dehydrogenase, cytosolic 1 OS=Mus musculus OX=10090 GN=Aldh1a7 PE=1 SV=1
1677	TRUE	Q6NSW3|SPKAP_MOUSE	0.99	0.47	1	1		160.874	159.105	173.816	164.598	18.6569	123.82	197.526	113.334	0.688552	0.380908	185095	A-kinase anchor protein SPHKAP OS=Mus musculus OX=10090 GN=Sphkap PE=1 SV=2
1464	TRUE	Q8CGP0|H2B3B_MOUSE	7.12	7.14	4	1		537.619	458.568	522.357	506.181	427.319	367.75	112.562	302.544	0.597698	0.110176	13908	Histone H2B type 3-B OS=Mus musculus OX=10090 GN=H2bc26 PE=1 SV=3
499	FALSE	P19639|GSTM3_MOUSE	45.19	3.21	3	1		1733.05	1801.58	1670.13	1734.92	706.357	638.612	723.13	689.367	0.397348	2.20315e-05	25702	Glutathione S-transferase Mu 3 OS=Mus musculus OX=10090 GN=Gstm3 PE=1 SV=2
1703	TRUE	Q5PR73|DIRA2_MOUSE	39.13	34.67	6	6		7234.73	7210.05	6341.12	6928.64	3461.32	3535.07	3314.6	3437	0.496057	0.00031516	22498	GTP-binding protein Di-Ras2 OS=Mus musculus OX=10090 GN=Diras2 PE=1 SV=1
419	TRUE	Q62167|DDX3X_MOUSE	39.86	19.64	13	12		2854.56	2924.81	2614.64	2798	1549.48	1464.67	1558.12	1524.09	0.544707	0.000206317	73101	ATP-dependent RNA helicase DDX3X OS=Mus musculus OX=10090 GN=Ddx3x PE=1 SV=3
2672	TRUE	Q9R0N3|SYT11_MOUSE	4.26	3.95	1	1		87.199	77.6734	71.3872	78.7532	88.2416	83.5309	79.6924	83.8216	1.06436	0.386465	48333	Synaptotagmin-11 OS=Mus musculus OX=10090 GN=Syt11 PE=1 SV=2
3042	TRUE	Q80VQ0|AL3B1_MOUSE	3.24	2.35	1	1		182.276	187.61	164.916	178.267	177.176	92.8463	195.758	155.26	0.870938	0.516808	52292	Aldehyde dehydrogenase family 3 member B1 OS=Mus musculus OX=10090 GN=Aldh3b1 PE=1 SV=1
30	TRUE	Q8VDN2|AT1A1_MOUSE	45.25	28.93	48	32	N-ethylmaleimide on cysteines; Oxidation (M); acrylamide	99552.8	98328.8	99971.4	99284.3	78545.1	79250.1	81019.5	79604.9	0.801787	2.42951e-05	112982	Sodium/potassium-transporting ATPase subunit alpha-1 OS=Mus musculus OX=10090 GN=Atp1a1 PE=1 SV=1
139	TRUE	P56480|ATPB_MOUSE	47.73	46.31	20	20	Oxidation (M)	94639.7	83459.4	87599.3	88566.1	23852.8	26342.8	26675.6	25623.7	0.289318	4.91111e-05	56300	ATP synthase subunit beta, mitochondrial OS=Mus musculus OX=10090 GN=Atp5f1b PE=1 SV=2
505	FALSE	P31001|DESM_MOUSE	12.06	1.92	2	1		242.399	312.844	305.566	286.936	91.5223	158.287	213.766	154.525	0.538535	0.0339876	53498	Desmin OS=Mus musculus OX=10090 GN=Des PE=1 SV=3
2334	TRUE	Q03717|KCNB1_MOUSE	4.99	1.05	1	1		175.413	320.204	476.14	323.919	421.541	359.708	504.159	428.469	1.32277	0.339064	95591	Potassium voltage-gated channel subfamily B member 1 OS=Mus musculus OX=10090 GN=Kcnb1 PE=1 SV=2
1665	TRUE	Q9QUR7|PIN1_MOUSE	7.37	25.45	3	3	Oxidation (M)	651.31	1221.16	1302.45	1058.31	720.367	717.911	688.475	708.918	0.669861	0.163686	18370	Peptidyl-prolyl cis-trans isomerase NIMA-interacting 1 OS=Mus musculus OX=10090 GN=Pin1 PE=1 SV=1
1881	TRUE	Q6Y685|TACC1_MOUSE	4.59	2.07	2	2		352.501	304.193	323.69	326.794	293.508	331.737	296.14	307.128	0.939821	0.351781	83952	Transforming acidic coiled-coil-containing protein 1 OS=Mus musculus OX=10090 GN=Tacc1 PE=1 SV=1
2207	TRUE	Q9DB60|PXL2B_MOUSE	31.41	8.46	2	2		1926.37	2320.99	2084.41	2110.59	622.874	583.18	832.589	679.548	0.32197	0.000492738	21670	Prostamide/prostaglandin F synthase OS=Mus musculus OX=10090 GN=Prxl2b PE=1 SV=1
1597	TRUE	Q921H8|THIKA_MOUSE	13.23	8.25	2	2		512.762	458.013	561.783	510.853	329.06	164.306	84.6838	192.683	0.37718	0.0150772	43953	3-ketoacyl-CoA thiolase A, peroxisomal OS=Mus musculus OX=10090 GN=Acaa1a PE=1 SV=1
478	TRUE	P68254|1433T_MOUSE	56.01	29.8	15	8		24265.3	24344.8	24842.8	24484.3	12588.1	12032.2	12630.2	12416.8	0.507135	1.37412e-06	27778	14-3-3 protein theta OS=Mus musculus OX=10090 GN=Ywhaq PE=1 SV=1
962	TRUE	Q91V12|BACH_MOUSE	36.4	23.36	7	7	Oxidation (M)	19914.2	24344.9	23114.7	22458	10179.9	9418.99	9227.45	9608.77	0.427856	0.000684521	42537	Cytosolic acyl coenzyme A thioester hydrolase OS=Mus musculus OX=10090 GN=Acot7 PE=1 SV=2
3044	TRUE	Q8C570|RAE1L_MOUSE	37.27	4.08	1	1		64.3367	68.7041	27.5201	53.5203	18.6569	18.6569	18.6569	18.6569	0.348594	0.0558493	40965	mRNA export factor OS=Mus musculus OX=10090 GN=Rae1 PE=1 SV=1
3027	TRUE	P62075|TIM13_MOUSE	23.87	26.32	2	2		272.066	304.772	166.265	247.701	76.5771	83.4515	76.7462	78.9249	0.318629	0.0157079	10458	Mitochondrial import inner membrane translocase subunit Tim13 OS=Mus musculus OX=10090 GN=Timm13 PE=1 SV=1
1868	TRUE	P51410|RL9_MOUSE	37.16	13.02	3	3		999.595	929.136	1105.49	1011.41	394.98	401.499	454.789	417.089	0.412385	0.000405547	21881	60S ribosomal protein L9 OS=Mus musculus OX=10090 GN=Rpl9 PE=1 SV=2
2246	TRUE	Q9DCZ4|MIC26_MOUSE	40.03	21.72	4	4		3851.36	3947.07	3722.84	3840.42	1595.88	1745.93	1884.11	1741.97	0.453589	3.78013e-05	22604	MICOS complex subunit Mic26 OS=Mus musculus OX=10090 GN=Apoo PE=1 SV=2
910	TRUE	Q3THK7|GUAA_MOUSE	4.24	9.52	6	6		826.867	1308.56	1243.85	1126.42	1150.37	509.321	974.093	877.928	0.779393	0.365354	76723	GMP synthase [glutamine-hydrolyzing] OS=Mus musculus OX=10090 GN=Gmps PE=1 SV=2
605	TRUE	Q62351|TFR1_MOUSE	9.86	11.93	9	9		1293.46	955.46	1199.34	1149.42	629.076	811.84	1017.45	819.456	0.712931	0.0938266	85731	Transferrin receptor protein 1 OS=Mus musculus OX=10090 GN=Tfrc PE=1 SV=1
2445	TRUE	Q9D4C9|CLVS1_MOUSE	11.95	5.65	2	2		239.202	332.187	171.396	247.595	86.6365	166.146	122.525	125.102	0.50527	0.0779071	40613	Clavesin-1 OS=Mus musculus OX=10090 GN=Clvs1 PE=1 SV=1
990	TRUE	P14231|AT1B2_MOUSE	50.1	24.14	8	8	Oxidation (M)	36560.1	36366.3	36949.1	36625.2	51668.3	52846.3	53902.6	52805.7	1.44179	1.72002e-05	33344	Sodium/potassium-transporting ATPase subunit beta-2 OS=Mus musculus OX=10090 GN=Atp1b2 PE=1 SV=2
1389	TRUE	P58389|PTPA_MOUSE	13.93	21.36	7	7		2099.56	1916.65	2905.29	2307.17	1582.99	663.117	832.877	1026.33	0.444843	0.0366623	36710	Serine/threonine-protein phosphatase 2A activator OS=Mus musculus OX=10090 GN=Ptpa PE=1 SV=1
2087	TRUE	Q3UN16|GP162_MOUSE	1.43	3.91	2	2		155.107	140.067	135.04	143.405	177.904	107.349	128.68	137.978	0.962155	0.815193	64148	Probable G-protein coupled receptor 162 OS=Mus musculus OX=10090 GN=Gpr162 PE=1 SV=2
337	TRUE	P29341|PABP1_MOUSE	53.89	33.02	20	20		6052.37	6122.62	6461.32	6212.1	2065.85	1887.43	1974.77	1976.02	0.318092	6.39661e-06	70671	Polyadenylate-binding protein 1 OS=Mus musculus OX=10090 GN=Pabpc1 PE=1 SV=2
896	TRUE	Q9JLJ2|AL9A1_MOUSE	25	25.3	11	11	Acetylation (Protein N-term)	3025.19	2891.09	2548.34	2821.54	1447.73	1508.29	1839.64	1598.55	0.566553	0.00282867	53515	4-trimethylaminobutyraldehyde dehydrogenase OS=Mus musculus OX=10090 GN=Aldh9a1 PE=1 SV=1
731	TRUE	P10493|NID1_MOUSE	22.36	8.35	10	9		1884.94	3013.22	1844.5	2247.56	982.155	834.275	792.882	869.771	0.386985	0.0236402	136538	Nidogen-1 OS=Mus musculus OX=10090 GN=Nid1 PE=1 SV=2
1491	TRUE	Q9QUR8|SEM7A_MOUSE	18.06	3.92	2	2		709.941	755.817	1014	826.587	550.608	460.52	427.077	479.402	0.579977	0.0268285	74994	Semaphorin-7A OS=Mus musculus OX=10090 GN=Sema7a PE=1 SV=1
2794	TRUE	Q00558|HAP40_MOUSE	5.28	3.67	1	1		50.3543	90.6489	80.7656	73.923	57.3112	54.734	60.9335	57.6596	0.779995	0.255243	40474	40-kDa huntingtin-associated protein OS=Mus musculus OX=10090 GN=F8a1 PE=1 SV=2
1139	TRUE	Q01815|CAC1C_MOUSE	0.84	2.48	5	4		486.859	486.06	452.324	475.081	408.185	391.389	605.755	468.443	0.986027	0.928768	240138	Voltage-dependent L-type calcium channel subunit alpha-1C OS=Mus musculus OX=10090 GN=Cacna1c PE=1 SV=1
1411	TRUE	Q91W86|VPS11_MOUSE	4.03	5.95	5	5		626.592	545.51	695.928	622.677	495.736	383.106	717.513	532.118	0.854566	0.446674	107719	Vacuolar protein sorting-associated protein 11 homolog OS=Mus musculus OX=10090 GN=Vps11 PE=1 SV=3
1064	TRUE	A2AGL3|RYR3_MOUSE	18.92	0.16	9	1		180.057	126.296	112.175	139.509	78.9445	66.3048	60.1729	68.4741	0.490822	0.0294175	551328	Ryanodine receptor 3 OS=Mus musculus OX=10090 GN=Ryr3 PE=1 SV=1
1625	TRUE	Q9CX34|SGT1_MOUSE	30.68	11.9	3	3	Acetylation (Protein N-term)	1940.56	1382.19	1505.15	1609.3	624.626	591.848	532.132	582.868	0.362187	0.00392166	38159	Protein SGT1 homolog OS=Mus musculus OX=10090 GN=Sugt1 PE=1 SV=3
1754	TRUE	P32883|RASK_MOUSE	49.55	12.7	4	2		3177.92	3240.54	3128.67	3182.38	1107.7	1181.72	1251.55	1180.32	0.370894	2.8582e-06	21656	GTPase KRas OS=Mus musculus OX=10090 GN=Kras PE=1 SV=1
1105	TRUE	P99029|PRDX5_MOUSE	27.77	38.1	9	9	Oxidation (M)	61875.2	59258.6	48833.6	56655.8	25671.4	26382.9	19989.5	24014.6	0.423868	0.00186643	21897	Peroxiredoxin-5, mitochondrial OS=Mus musculus OX=10090 GN=Prdx5 PE=1 SV=2
770	TRUE	Q64516|GLPK_MOUSE	25.86	15.74	9	9		2186.72	1969.69	1796.22	1984.21	1013.46	1091.23	1259.48	1121.39	0.565158	0.00301638	61227	Glycerol kinase OS=Mus musculus OX=10090 GN=Gk PE=1 SV=2
411	TRUE	P80317|TCPZ_MOUSE	30.16	30.32	17	17		4882.11	4371.75	5320.91	4858.26	2842.24	2569.35	2470.91	2627.5	0.540832	0.00165802	58004	T-complex protein 1 subunit zeta OS=Mus musculus OX=10090 GN=Cct6a PE=1 SV=3
1738	TRUE	Q78ZA7|NP1L4_MOUSE	16.46	20	6	5	Acetylation (Protein N-term)	1222.28	1232.31	1005.78	1153.45	366.933	316.058	730.434	471.142	0.408461	0.0104149	42679	Nucleosome assembly protein 1-like 4 OS=Mus musculus OX=10090 GN=Nap1l4 PE=1 SV=1
3751	TRUE	P83870|PHF5A_MOUSE	22.52	6.36	1	1		723.671	443.008	781.542	649.407	211.378	242.489	244.758	232.875	0.358596	0.0166311	12405	PHD finger-like domain-containing protein 5A OS=Mus musculus OX=10090 GN=Phf5a PE=1 SV=1
1682	TRUE	Q6PE13|PRRT3_MOUSE	13.69	5.66	5	5		1959.6	1621.92	1117.7	1566.4	3121.45	2241.93	2718.78	2694.05	1.7199	0.0330108	101224	Proline-rich transmembrane protein 3 OS=Mus musculus OX=10090 GN=Prrt3 PE=1 SV=1
1303	TRUE	Q9D517|PLCC_MOUSE	0.79	10.11	4	4		1674.53	1616.77	1509.7	1600.33	1676.92	1582.97	1493.61	1584.5	0.990107	0.835922	43296	1-acyl-sn-glycerol-3-phosphate acyltransferase gamma OS=Mus musculus OX=10090 GN=Agpat3 PE=1 SV=2
221	TRUE	Q9Z0H8|CLIP2_MOUSE	7.04	18.43	21	18		2030.62	1304.78	1245.19	1526.86	1277.13	706.065	1187.85	1057.01	0.692277	0.202464	115910	CAP-Gly domain-containing linker protein 2 OS=Mus musculus OX=10090 GN=Clip2 PE=1 SV=2
2476	TRUE	Q8C878|UBA3_MOUSE	28.11	4.55	2	2		1212.37	1028.61	985.215	1075.4	411.718	284.702	250.119	315.513	0.293392	0.000874144	51737	NEDD8-activating enzyme E1 catalytic subunit OS=Mus musculus OX=10090 GN=Uba3 PE=1 SV=2
289	TRUE	P51881|ADT2_MOUSE	65.42	17.45	14	6	Acetylation (Protein N-term)	71671.9	71867.4	71822.2	71787.2	38113.4	38459.2	39304.7	38625.8	0.538059	8.21107e-08	32931	ADP/ATP translocase 2 OS=Mus musculus OX=10090 GN=Slc25a5 PE=1 SV=3
1033	TRUE	Q9WUM5|SUCA_MOUSE	44.84	20.81	6	6	Oxidation (M)	16369	15112.7	15517.7	15666.4	8046.53	7720.51	8341.26	8036.1	0.51295	4.96947e-05	36155	Succinate--CoA ligase [ADP/GDP-forming] subunit alpha, mitochondrial OS=Mus musculus OX=10090 GN=Suclg1 PE=1 SV=4
234	TRUE	Q8K310|MATR3_MOUSE	32.5	26.24	22	22		9559.61	10154.2	9799.93	9837.92	3367.28	4340.4	4422.21	4043.3	0.410991	0.000108198	94630	Matrin-3 OS=Mus musculus OX=10090 GN=Matr3 PE=1 SV=1
2613	TRUE	P26645|MARCS_MOUSE	7.01	8.41	2	2		391.454	408.942	536.082	445.493	278.934	413.961	367.328	353.408	0.793296	0.201884	29661	Myristoylated alanine-rich C-kinase substrate OS=Mus musculus OX=10090 GN=Marcks PE=1 SV=2
708	TRUE	Q8K3H0|DP13A_MOUSE	44.01	17.26	10	10		2354	2469.5	2449.65	2424.38	991.746	877.356	846.017	905.039	0.373307	1.16572e-05	79328	DCC-interacting protein 13-alpha OS=Mus musculus OX=10090 GN=Appl1 PE=1 SV=1
342	TRUE	Q9EQH3|VPS35_MOUSE	37.95	24.5	18	18		6840.43	7016.3	7303.8	7053.51	3582.59	3869.14	4107.77	3853.16	0.546276	9.49306e-05	91713	Vacuolar protein sorting-associated protein 35 OS=Mus musculus OX=10090 GN=Vps35 PE=1 SV=1
3429	TRUE	Q8C561|LMBD2_MOUSE	1.97	2.02	1	1		101.165	114.122	117.568	110.952	101.86	104.637	162.359	122.952	1.10816	0.586949	81101	G-protein coupled receptor-associated protein LMBRD2 OS=Mus musculus OX=10090 GN=Lmbrd2 PE=1 SV=1
3103	TRUE	P14069|S10A6_MOUSE	13.24	7.87	1	1		775.776	890.272	972.894	879.647	417.257	138.733	445.543	333.844	0.379521	0.00855493	10051	Protein S100-A6 OS=Mus musculus OX=10090 GN=S100a6 PE=1 SV=3
1658	FALSE	Q8VHP7|ILEUB_MOUSE	23.71	5.24	2	2		246.218	357.985	298.988	301.064	129.838	147.052	104.562	127.15	0.422337	0.00732128	42887	Leukocyte elastase inhibitor B OS=Mus musculus OX=10090 GN=Serpinb1b PE=1 SV=1
2226	TRUE	O70378|EMC8_MOUSE	11.41	16.43	3	3		684.847	735.483	670.556	696.962	641.002	442.902	383.347	489.084	0.701737	0.060831	23348	ER membrane protein complex subunit 8 OS=Mus musculus OX=10090 GN=Emc8 PE=1 SV=1
1299	TRUE	Q921F4|HNRLL_MOUSE	14.1	12.01	6	6		903.563	1037.17	966.762	969.166	366.589	655.07	643.821	555.16	0.572822	0.0153268	64125	Heterogeneous nuclear ribonucleoprotein L-like OS=Mus musculus OX=10090 GN=Hnrnpll PE=1 SV=3
1047	TRUE	Q3TPX4|EXOC5_MOUSE	28	5.37	4	4		600.53	579.006	603.846	594.461	415.647	468.314	452.939	445.633	0.749643	0.0010411	81738	Exocyst complex component 5 OS=Mus musculus OX=10090 GN=Exoc5 PE=1 SV=2
1599	TRUE	O55126|NIPS2_MOUSE	27.65	14.95	5	5		6655.97	6905.72	7247.17	6936.29	2204.33	2231.85	3300.84	2579.01	0.371814	0.000401653	32933	Protein NipSnap homolog 2 OS=Mus musculus OX=10090 GN=Nipsnap2 PE=1 SV=1
810	TRUE	P46735|MYO1B_MOUSE	39.3	4.34	4	4		6890.86	6212.97	6273.87	6459.23	3803.96	3574.78	3660.91	3679.88	0.569709	0.000253787	128564	Unconventional myosin-Ib OS=Mus musculus OX=10090 GN=Myo1b PE=1 SV=3
2624	TRUE	Q8VI59|PCX3_MOUSE	5.08	1.13	2	2		1765.4	945.083	2425.19	1711.89	5746.96	4269.35	1167.48	3727.93	2.17767	0.227534	221573	Pecanex-like protein 3 OS=Mus musculus OX=10090 GN=Pcnx3 PE=1 SV=2
857	TRUE	Q61753|SERA_MOUSE	48.25	21.95	12	12		13726.4	14480.5	14055.3	14087.4	7684.74	8013.37	7535.49	7744.53	0.54975	1.67385e-05	56586	D-3-phosphoglycerate dehydrogenase OS=Mus musculus OX=10090 GN=Phgdh PE=1 SV=3
208	TRUE	Q9QZQ1|AFAD_MOUSE	4.64	11.76	19	19		1075.04	975.122	1447.94	1166.03	925.142	984.533	1099.42	1003.03	0.860208	0.345897	206499	Afadin OS=Mus musculus OX=10090 GN=Afdn PE=1 SV=3
2322	TRUE	Q3U0D9|HACE1_MOUSE	16.74	2.75	2	2		232.03	168.994	152.932	184.652	96.6698	106.159	121.566	108.132	0.585598	0.0385565	102114	E3 ubiquitin-protein ligase HACE1 OS=Mus musculus OX=10090 GN=Hace1 PE=1 SV=1
411	FALSE	Q61390|TCPW_MOUSE	23.65	11.49	5	5		2284.36	2825.62	2195.42	2435.13	1390.16	1532.72	1520.9	1481.26	0.608287	0.0091811	58185	T-complex protein 1 subunit zeta-2 OS=Mus musculus OX=10090 GN=Cct6b PE=1 SV=4
1065	TRUE	P46638|RB11B_MOUSE	33.64	48.17	10	10	Acetylation (Protein N-term)	3171.06	3185.43	2767.82	3041.44	1362.44	1544.56	1590.11	1499.04	0.492871	0.000552062	24489	Ras-related protein Rab-11B OS=Mus musculus OX=10090 GN=Rab11b PE=1 SV=3
3055	TRUE	Q9DCM0|ETHE1_MOUSE	28.7	12.2	2	2		1509.83	1018.49	1276.99	1268.44	338.333	375.972	243.308	319.204	0.251652	0.00298311	27739	Persulfide dioxygenase ETHE1, mitochondrial OS=Mus musculus OX=10090 GN=Ethe1 PE=1 SV=2
2549	FALSE	Q9Z2N8|ACL6A_MOUSE	11.09	2.8	1	1		178.253	181.142	375.745	245.047	103.493	144.595	125.002	124.364	0.50751	0.143399	47448	Actin-like protein 6A OS=Mus musculus OX=10090 GN=Actl6a PE=1 SV=2
1458	TRUE	Q8K274|KT3K_MOUSE	3.21	9.71	4	4		1031.4	1169.76	710.479	970.547	894.387	993.271	562.222	816.627	0.841409	0.45983	34468	Ketosamine-3-kinase OS=Mus musculus OX=10090 GN=Fn3krp PE=1 SV=2
518	TRUE	Q08460|KCMA1_MOUSE	24.71	13.4	14	14		2958.99	2805.76	3446.18	3070.31	4517.44	4506.86	4456.18	4493.49	1.46353	0.00183778	134396	Calcium-activated potassium channel subunit alpha-1 OS=Mus musculus OX=10090 GN=Kcnma1 PE=1 SV=2
2646	TRUE	Q64012|RALY_MOUSE	0.51	3.85	1	1		247.269	112.898	79.3376	146.502	103.305	153.141	119.362	125.269	0.855069	0.711054	33188	RNA-binding protein Raly OS=Mus musculus OX=10090 GN=Raly PE=1 SV=3
2027	TRUE	P31230|AIMP1_MOUSE	18.79	14.84	3	3		437.677	520.118	353.368	437.054	268.02	248.927	202.001	239.649	0.548328	0.0191415	33997	Aminoacyl tRNA synthase complex-interacting multifunctional protein 1 OS=Mus musculus OX=10090 GN=Aimp1 PE=1 SV=2
822	TRUE	Q8C078|KKCC2_MOUSE	28.6	14.63	8	8		2372.71	2677.63	2486.73	2512.36	1050.65	1196.76	824.447	1023.95	0.407565	0.000445019	64618	Calcium/calmodulin-dependent protein kinase kinase 2 OS=Mus musculus OX=10090 GN=Camkk2 PE=1 SV=2
1984	TRUE	Q7TPS5|C2CD5_MOUSE	9.03	3.54	3	3		836.383	620.059	607.552	687.998	515.143	292.669	557.257	455.023	0.661372	0.103126	111664	C2 domain-containing protein 5 OS=Mus musculus OX=10090 GN=C2cd5 PE=1 SV=2
1779	TRUE	Q8C166|CPNE1_MOUSE	20.39	3.36	3	2		903.265	734.202	866.58	834.683	460.757	503.736	599.863	521.452	0.624731	0.00889425	58887	Copine-1 OS=Mus musculus OX=10090 GN=Cpne1 PE=1 SV=1
3602	TRUE	P56382|ATP5E_MOUSE	37.43	15.38	1	1		2854.11	2679.29	2793.84	2775.75	1890.48	1734.66	1755.81	1793.65	0.646187	0.000156431	5838	ATP synthase subunit epsilon, mitochondrial OS=Mus musculus OX=10090 GN=Atp5f1e PE=1 SV=2
3072	TRUE	Q9D1M0|SEC13_MOUSE	9.21	5.28	1	1		118.907	148.264	83.8195	116.997	70.0914	73.238	18.6569	53.9954	0.461512	0.0702732	35566	Protein SEC13 homolog OS=Mus musculus OX=10090 GN=Sec13 PE=1 SV=3
2497	TRUE	Q505D9|TRI67_MOUSE	15.96	1.56	3	1		192.692	227.038	295.513	238.414	338.377	407.753	452.465	399.532	1.67579	0.0229763	82760	Tripartite motif-containing protein 67 OS=Mus musculus OX=10090 GN=Trim67 PE=2 SV=1
1440	TRUE	Q8BXK8|AGAP1_MOUSE	3.6	4.2	6	3		447.44	270.355	384.16	367.318	289.497	418.497	187.916	298.636	0.813018	0.461804	94411	Arf-GAP with GTPase, ANK repeat and PH domain-containing protein 1 OS=Mus musculus OX=10090 GN=Agap1 PE=1 SV=1
653	TRUE	E9Q0S6|TENS1_MOUSE	7.44	3.76	7	5		405.657	351.692	466.547	407.965	488.277	502.299	429.883	473.486	1.1606	0.175943	201383	Tensin-1 OS=Mus musculus OX=10090 GN=Tns1 PE=1 SV=1
1000	TRUE	Q9DBT5|AMPD2_MOUSE	6.35	11.4	9	9		1264.86	1004.59	1544.35	1271.27	993.243	1186.33	873	1017.52	0.800402	0.23273	92024	AMP deaminase 2 OS=Mus musculus OX=10090 GN=Ampd2 PE=1 SV=1
2723	FALSE	P62838|UB2D2_MOUSE	65.5	7.48	1	1		7662.89	7702.76	7644.74	7670.13	4009.92	3917.24	3883.53	3936.9	0.513277	9.14539e-08	16735	Ubiquitin-conjugating enzyme E2 D2 OS=Mus musculus OX=10090 GN=Ube2d2 PE=1 SV=1
1294	TRUE	P62484|ABI2_MOUSE	41.98	5.16	6	2		901.694	817.649	776.235	831.859	135.504	120.849	95.2074	117.187	0.140873	5.08063e-05	49387	Abl interactor 2 OS=Mus musculus OX=10090 GN=Abi2 PE=1 SV=1
1330	FALSE	P58321|UCHL4_MOUSE	47.01	18.88	3	3		1433.14	1329.9	1286.25	1349.76	635.255	619.557	625.241	626.685	0.464292	7.87732e-05	26450	Ubiquitin carboxyl-terminal hydrolase isozyme L4 OS=Mus musculus OX=10090 GN=Uchl4 PE=2 SV=1
2308	TRUE	Q9JK45|KCNQ5_MOUSE	2.41	1.29	2	1		156.98	86.4641	132.08	125.175	94.4428	140.772	88.6389	107.951	0.862403	0.550123	102258	Potassium voltage-gated channel subfamily KQT member 5 OS=Mus musculus OX=10090 GN=Kcnq5 PE=1 SV=2
119	TRUE	P58281|OPA1_MOUSE	48.35	37.71	33	33		5758.54	5727.32	6008.23	5831.36	2779.23	3012.75	2887.49	2893.16	0.496137	1.2367e-05	111339	Dynamin-like 120 kDa protein, mitochondrial OS=Mus musculus OX=10090 GN=Opa1 PE=1 SV=1
2268	TRUE	A2A8U2|TM201_MOUSE	15.89	3.77	2	2		8403.14	8897.08	8445.29	8581.84	8020.16	7967.15	8111.76	8033.02	0.936049	0.0284644	72500	Transmembrane protein 201 OS=Mus musculus OX=10090 GN=Tmem201 PE=1 SV=1
2063	TRUE	Q3UHK1|MYCT_MOUSE	12.28	6.28	3	3		670.211	354.46	395.538	473.403	734.3	730.927	994.864	820.03	1.7322	0.0586297	69062	Proton myo-inositol cotransporter OS=Mus musculus OX=10090 GN=Slc2a13 PE=1 SV=2
1206	TRUE	Q6ZWY9|H2B1C_MOUSE	38.61	5.56	6	1		805.324	779.561	752.187	779.024	405.198	427.735	370.338	401.091	0.514863	7.59052e-05	13906	Histone H2B type 1-C/E/G OS=Mus musculus OX=10090 GN=H2bc4 PE=1 SV=3
2320	TRUE	Q9EPQ8|TCF20_MOUSE	4.02	1.11	1	1		145.689	79.4034	114.79	113.294	147.805	123.979	123.155	131.646	1.16198	0.427159	215683	Transcription factor 20 OS=Mus musculus OX=10090 GN=Tcf20 PE=1 SV=3
3246	TRUE	P97863|NFIB_MOUSE	10.76	1.93	1	1		125.401	90.0981	84.6685	100.056	74.8941	73.5602	75.1149	74.5231	0.744815	0.116365	63507	Nuclear factor 1 B-type OS=Mus musculus OX=10090 GN=Nfib PE=1 SV=2
1130	TRUE	Q9CXJ4|MITOS_MOUSE	5.72	10.32	7	7		813.084	706.24	472.393	663.906	756.536	906.45	769.518	810.835	1.22131	0.257797	78000	Mitochondrial potassium channel ATP-binding subunit OS=Mus musculus OX=10090 GN=Abcb8 PE=1 SV=1
612	TRUE	Q99JY0|ECHB_MOUSE	21.8	31.58	15	15		6997.36	7063.25	7409.41	7156.67	3784.03	2130.98	3185.41	3033.47	0.423866	0.0011778	51386	Trifunctional enzyme subunit beta, mitochondrial OS=Mus musculus OX=10090 GN=Hadhb PE=1 SV=1
2887	TRUE	O35226|PSMD4_MOUSE	23.49	4.79	1	1		939.028	833.527	820.198	864.251	109.217	160.317	283.841	184.458	0.213431	0.000445505	40704	26S proteasome non-ATPase regulatory subunit 4 OS=Mus musculus OX=10090 GN=Psmd4 PE=1 SV=1
112	TRUE	Q91VD9|NDUS1_MOUSE	29.89	42.37	28	28	Oxidation (M)	38948.8	38525	31661.8	36378.5	20191.1	18123.1	19324.4	19212.9	0.528138	0.00213974	79777	NADH-ubiquinone oxidoreductase 75 kDa subunit, mitochondrial OS=Mus musculus OX=10090 GN=Ndufs1 PE=1 SV=2
3936	TRUE	Q9DCH6|ZFAN6_MOUSE	55.93	5.38	1	1		82.1221	95.6523	65.0695	80.948	18.6569	18.6569	18.6569	18.6569	0.23048	0.00214563	24001	AN1-type zinc finger protein 6 OS=Mus musculus OX=10090 GN=Zfand6 PE=1 SV=1
1911	TRUE	Q6PGF7|EXOC8_MOUSE	14.86	2.23	2	2		317.419	272.54	393.829	327.929	236.334	231.109	216.261	227.901	0.694971	0.0495471	81035	Exocyst complex component 8 OS=Mus musculus OX=10090 GN=Exoc8 PE=1 SV=1
2325	TRUE	Q8VD62|CK068_MOUSE	47.34	7.05	2	2		470.711	439.845	423.256	444.604	137.089	128.559	118.524	128.058	0.288026	2.90504e-05	31846	UPF0696 protein C11orf68 homolog OS=Mus musculus OX=10090 GN=Bles03 PE=1 SV=2
701	FALSE	P97324|G6PD2_MOUSE	26.62	4.09	2	2		413.333	447.897	388.465	416.565	301.436	270.626	265.616	279.226	0.670306	0.00260711	59126	Glucose-6-phosphate 1-dehydrogenase 2 OS=Mus musculus OX=10090 GN=G6pd2 PE=1 SV=3
2689	TRUE	Q8VI51|SORC3_MOUSE	0.88	0.82	1	1		57.9068	130.463	117.161	101.844	96.8926	99.0271	111.699	102.539	1.00683	0.977098	135985	VPS10 domain-containing receptor SorCS3 OS=Mus musculus OX=10090 GN=Sorcs3 PE=1 SV=1
3512	TRUE	O88487|DC1I2_MOUSE	10.3	1.47	1	1		108.845	105.955	91.4934	102.098	92.5952	85.9472	71.55	83.3641	0.816511	0.0845879	68394	Cytoplasmic dynein 1 intermediate chain 2 OS=Mus musculus OX=10090 GN=Dync1i2 PE=1 SV=1
557	TRUE	Q80TV8|CLAP1_MOUSE	12.47	7.88	12	10		997.14	840.218	990.529	942.629	839.773	752.355	785.9	792.676	0.84092	0.0587557	169227	CLIP-associating protein 1 OS=Mus musculus OX=10090 GN=Clasp1 PE=1 SV=2
1201	TRUE	O35239|PTN9_MOUSE	14.4	6.24	3	3		680.913	576.544	517.98	591.812	187.016	345.921	368.798	300.579	0.507895	0.0173439	67970	Tyrosine-protein phosphatase non-receptor type 9 OS=Mus musculus OX=10090 GN=Ptpn9 PE=1 SV=2
492	FALSE	A2A4P0|DHX8_MOUSE	7.01	0.72	1	1		224.717	453.374	564.816	414.302	185.678	228.537	314.204	242.806	0.586061	0.184233	142572	ATP-dependent RNA helicase DHX8 OS=Mus musculus OX=10090 GN=Dhx8 PE=2 SV=1
1896	TRUE	Q8VBW6|ULA1_MOUSE	23.99	6.93	3	3		1159.2	973.858	1061.03	1064.7	718.891	670.668	578.081	655.88	0.616025	0.00377674	60274	NEDD8-activating enzyme E1 regulatory subunit OS=Mus musculus OX=10090 GN=Nae1 PE=1 SV=1
3834	TRUE	Q99J83|ATG5_MOUSE	10.78	3.27	1	1		69.282	150.266	80.8089	100.119	18.6569	18.6569	60.3469	32.5535	0.325148	0.0792756	32402	Autophagy protein 5 OS=Mus musculus OX=10090 GN=Atg5 PE=1 SV=1
3153	TRUE	O55135|IF6_MOUSE	14.14	11.43	2	2		246.848	183.993	261.418	230.753	61.3178	154.334	56.197	90.6164	0.392699	0.024365	26511	Eukaryotic translation initiation factor 6 OS=Mus musculus OX=10090 GN=Eif6 PE=1 SV=2
1350	TRUE	Q9DC70|NDUS7_MOUSE	44.01	22.77	7	7	Oxidation (M)	14630.3	13690	13720.5	14013.6	6064.4	6043.83	6717.81	6275.35	0.447804	3.42132e-05	24683	NADH dehydrogenase [ubiquinone] iron-sulfur protein 7, mitochondrial OS=Mus musculus OX=10090 GN=Ndufs7 PE=1 SV=1
1502	TRUE	P97765|WBP2_MOUSE	35.57	19.54	6	6		3536.66	3999.24	3728.73	3754.87	1644.16	1656.39	1359.33	1553.29	0.413674	0.000185006	28032	WW domain-binding protein 2 OS=Mus musculus OX=10090 GN=Wbp2 PE=1 SV=1
509	TRUE	Q9D0R2|SYTC_MOUSE	1.05	16.07	11	10		1089.99	1491.2	1236.17	1272.45	1350.43	1059.43	1267.98	1225.95	0.96345	0.76562	83356	Threonine--tRNA ligase 1, cytoplasmic OS=Mus musculus OX=10090 GN=Tars1 PE=1 SV=2
2311	TRUE	Q9Z2A0|PDPK1_MOUSE	6.52	1.43	1	1		141.455	100.477	123.812	121.914	89.152	118.649	93.5867	100.462	0.824041	0.226041	63759	3-phosphoinositide-dependent protein kinase 1 OS=Mus musculus OX=10090 GN=Pdpk1 PE=1 SV=2
1885	TRUE	P03921|NU5M_MOUSE	20.2	3.95	2	2		6198.61	5873.14	6020.4	6030.72	5197.15	5562.51	5323.34	5361	0.888949	0.00933134	68475	NADH-ubiquinone oxidoreductase chain 5 OS=Mus musculus OX=10090 GN=Mtnd5 PE=1 SV=3
2371	TRUE	Q61220|NELL2_MOUSE	6.02	2.32	2	2		237.535	516.547	602.226	452.103	229.263	131.505	416.015	258.928	0.572719	0.234589	91432	Protein kinase C-binding protein NELL2 OS=Mus musculus OX=10090 GN=Nell2 PE=1 SV=3
3287	TRUE	Q8K3E5|AHI1_MOUSE	1.19	1.15	1	1		128.718	131.517	101.813	120.683	148.674	119.158	109.651	125.828	1.04263	0.750294	119650	Jouberin OS=Mus musculus OX=10090 GN=Ahi1 PE=1 SV=2
189	TRUE	P28738|KIF5C_MOUSE	8.91	12.24	20	10		1941.72	1544.39	2140.37	1875.49	1141.05	1459.81	1661.66	1420.84	0.757582	0.121184	109275	Kinesin heavy chain isoform 5C OS=Mus musculus OX=10090 GN=Kif5c PE=1 SV=3
2391	TRUE	P62317|SMD2_MOUSE	31.56	22.88	3	3		1329.7	1499.67	1410.28	1413.22	553.601	665.908	714.105	644.538	0.456078	0.000355931	13527	Small nuclear ribonucleoprotein Sm D2 OS=Mus musculus OX=10090 GN=Snrpd2 PE=1 SV=1
2655	TRUE	P62342|SELT_MOUSE	7.98	11.79	2	2		942.357	2063.18	1401.41	1468.98	844.283	1153.47	502.496	833.415	0.567341	0.165989	22261	Thioredoxin reductase-like selenoprotein T OS=Mus musculus OX=10090 GN=Selenot PE=1 SV=2
689	TRUE	Q8K0T0|RTN1_MOUSE	44.81	18.08	12	12		42052.6	42867.8	40261.9	41727.4	26162.4	25981.2	27038.5	26394	0.632534	5.19892e-05	83572	Reticulon-1 OS=Mus musculus OX=10090 GN=Rtn1 PE=1 SV=1
4139	TRUE	P56379|ATP68_MOUSE	25.23	13.79	1	1		1989.64	2128.58	1867.58	1995.27	1042.9	1317.05	1240.51	1200.15	0.6015	0.0020209	6698	ATP synthase subunit ATP5MPL, mitochondrial OS=Mus musculus OX=10090 GN=Atp5mpl PE=1 SV=1
3056	TRUE	Q8VHC3|SELM_MOUSE	6.55	9.66	1	1		461.898	671.837	433.772	522.502	418.483	147.822	425.775	330.693	0.632903	0.180392	16347	Selenoprotein M OS=Mus musculus OX=10090 GN=Selenom PE=1 SV=3
271	TRUE	Q4KUS2|UN13A_MOUSE	28.5	8.64	17	15		1718.52	1933.87	2049.09	1900.49	1225.54	1231.88	1278.19	1245.2	0.655202	0.00262971	193782	Protein unc-13 homolog A OS=Mus musculus OX=10090 GN=Unc13a PE=1 SV=3
2263	TRUE	P62331|ARF6_MOUSE	37.7	21.14	3	3		2574.84	2621.37	2751.82	2649.34	1328.94	1176.79	1384.61	1296.78	0.489472	7.77039e-05	20082	ADP-ribosylation factor 6 OS=Mus musculus OX=10090 GN=Arf6 PE=1 SV=2
1288	TRUE	Q8C0C7|SYFA_MOUSE	25.58	5.31	3	3		703.44	654.488	621.306	659.745	292.529	345.178	402.493	346.733	0.525557	0.00140133	57599	Phenylalanine--tRNA ligase alpha subunit OS=Mus musculus OX=10090 GN=Farsa PE=1 SV=1
1120	TRUE	Q99LD4|CSN1_MOUSE	29.13	18.05	8	8		2218.24	2324.37	2417.22	2319.94	1365.12	1505.78	1221.3	1364.07	0.587975	0.000675399	53442	COP9 signalosome complex subunit 1 OS=Mus musculus OX=10090 GN=Gps1 PE=1 SV=1
1073	TRUE	Q9WV54|ASAH1_MOUSE	2.52	14.97	6	6		910.149	999.148	767.727	892.341	806.439	980.947	1111.39	966.257	1.08283	0.542289	44670	Acid ceramidase OS=Mus musculus OX=10090 GN=Asah1 PE=1 SV=1
606	TRUE	P17742|PPIA_MOUSE	67.83	43.9	9	9	Oxidation (M)	155557	150883	154517	153653	65646.7	66804.9	66695.1	66382.2	0.432028	4.7438e-07	17971	Peptidyl-prolyl cis-trans isomerase A OS=Mus musculus OX=10090 GN=Ppia PE=1 SV=2
2731	TRUE	Q922R1|PHAF1_MOUSE	4.25	3.08	1	1		99.9353	136.404	147.11	127.816	93.3232	123.856	112.646	109.942	0.860152	0.348186	47416	Phagosome assembly factor 1 OS=Mus musculus OX=10090 GN=Phaf1 PE=1 SV=2
2701	TRUE	Q60960|IMA5_MOUSE	12.24	5.58	2	2		165.485	242.439	305.315	237.746	143.992	154.808	125.881	141.56	0.595425	0.0803669	60183	Importin subunit alpha-5 OS=Mus musculus OX=10090 GN=Kpna1 PE=1 SV=2
1610	TRUE	Q8JZQ9|EIF3B_MOUSE	16.63	1.62	1	1		191.127	177.252	158.431	175.603	86.779	129.049	115.304	110.377	0.628562	0.0140381	91370	Eukaryotic translation initiation factor 3 subunit B OS=Mus musculus OX=10090 GN=Eif3b PE=1 SV=1
1571	TRUE	P63137|GBRB2_MOUSE	1.8	5.47	5	2		188375	141574	187713	172554	159709	166964	163881	163518	0.947632	0.594234	59197	Gamma-aminobutyric acid receptor subunit beta-2 OS=Mus musculus OX=10090 GN=Gabrb2 PE=1 SV=2
21	TRUE	E9Q3L2|PI4KA_MOUSE	9.04	26.22	52	52	Oxidation (M)	7657.27	7643.27	6828.51	7376.35	7847.56	8530.39	7845.74	8074.56	1.09466	0.121655	237042	Phosphatidylinositol 4-kinase alpha OS=Mus musculus OX=10090 GN=Pi4ka PE=1 SV=2
3105	TRUE	Q9ERR7|SEP15_MOUSE	10.26	8.02	1	1		335.081	172.773	259.573	255.809	127.613	172.688	58.9594	119.753	0.468136	0.0767166	17775	Selenoprotein F OS=Mus musculus OX=10090 GN=Selenof PE=1 SV=3
1226	TRUE	Q9Z1Q2|ABHGA_MOUSE	15.5	10.75	6	6		997.818	895.356	891.403	928.192	1242.58	1146.36	1578.13	1322.36	1.42466	0.0436495	63086	Phosphatidylserine lipase ABHD16A OS=Mus musculus OX=10090 GN=Abhd16a PE=1 SV=3
959	TRUE	Q9D0I9|SYRC_MOUSE	28.03	13.48	8	8		2238.14	2681.59	2533	2484.24	1059.4	773.233	672.214	834.949	0.336098	0.000697869	75674	Arginine--tRNA ligase, cytoplasmic OS=Mus musculus OX=10090 GN=Rars1 PE=1 SV=2
5	TRUE	Q62261|SPTB2_MOUSE	41.16	49.64	112	108	Oxidation (M)	24292.9	24153.7	24245.1	24230.6	20403.5	20919.7	21006.5	20776.6	0.857453	5.68054e-05	274223	Spectrin beta chain, non-erythrocytic 1 OS=Mus musculus OX=10090 GN=Sptbn1 PE=1 SV=2
3246	TRUE	P70255|NFIC_MOUSE	10.76	2.51	1	1		125.401	90.0981	84.6685	100.056	74.8941	73.5602	75.1149	74.5231	0.744815	0.116365	48768	Nuclear factor 1 C-type OS=Mus musculus OX=10090 GN=Nfic PE=1 SV=1
3170	TRUE	Q9CRD0|OCAD1_MOUSE	2.7	9.72	2	2		252.55	351.964	333.252	312.589	316.794	177.389	333.097	275.76	0.882182	0.560379	27610	OCIA domain-containing protein 1 OS=Mus musculus OX=10090 GN=Ociad1 PE=1 SV=1
72	FALSE	P53657|KPYR_MOUSE	61.58	1.92	1	1		44589.4	44457.8	43972.9	44340	28565.5	29148.7	29130.8	28948.4	0.652872	5.50177e-07	62309	Pyruvate kinase PKLR OS=Mus musculus OX=10090 GN=Pklr PE=1 SV=1
4134	TRUE	Q9CYN9|RENR_MOUSE	28.93	3.71	1	1		555.884	499.423	547.911	534.406	98.7286	157.687	165.674	140.696	0.263276	0.000138517	39092	Renin receptor OS=Mus musculus OX=10090 GN=Atp6ap2 PE=1 SV=2
105	TRUE	Q8CI94|PYGB_MOUSE	52.62	32.62	32	25	Acetylation (Protein N-term)	10475.5	10774.3	10799.3	10683	6363.11	6436.52	6625.47	6475.03	0.606105	5.44875e-06	96730	Glycogen phosphorylase, brain form OS=Mus musculus OX=10090 GN=Pygb PE=1 SV=3
3969	TRUE	Q8BP40|PPA6_MOUSE	24.4	1.91	1	1		219.598	249.005	287.733	252.112	65.2174	112.088	70.1878	82.4978	0.327227	0.00235643	47625	Lysophosphatidic acid phosphatase type 6 OS=Mus musculus OX=10090 GN=Acp6 PE=1 SV=1
2790	TRUE	Q9JJI8|RL38_MOUSE	8.57	14.29	1	1		155.656	152.945	190.765	166.455	146.81	144.014	144.947	145.257	0.872648	0.157488	8204	60S ribosomal protein L38 OS=Mus musculus OX=10090 GN=Rpl38 PE=1 SV=3
1649	TRUE	Q8JZS0|LIN7A_MOUSE	0.51	8.58	5	2		703.981	688.323	606.518	666.274	298.236	297.882	2421.08	1005.73	1.50949	0.656787	25993	Protein lin-7 homolog A OS=Mus musculus OX=10090 GN=Lin7a PE=1 SV=2
3217	TRUE	O35682|MYADM_MOUSE	33.57	8.44	2	2		4213.18	4065.27	3863.63	4047.36	5583.93	5997.55	5684.08	5755.19	1.42196	0.000442482	35285	Myeloid-associated differentiation marker OS=Mus musculus OX=10090 GN=Myadm PE=1 SV=2
2554	TRUE	Q9CQF3|CPSF5_MOUSE	45.27	3.96	1	1		41.3794	72.7076	75.5629	63.2167	18.6569	18.6569	18.6569	18.6569	0.295126	0.0152292	26240	Cleavage and polyadenylation specificity factor subunit 5 OS=Mus musculus OX=10090 GN=Nudt21 PE=1 SV=1
2736	TRUE	Q8K4L4|POF1B_MOUSE	35.99	1.7	1	1		253.159	258.236	303.434	271.61	69.8057	55.4967	77.3634	67.5553	0.248722	0.000290245	67785	Protein POF1B OS=Mus musculus OX=10090 GN=Pof1b PE=2 SV=3
2727	TRUE	Q8K0G5|EIPR1_MOUSE	4.31	2.33	1	1		119.485	83.7698	101.625	101.627	104.54	53.2337	18.6569	58.8102	0.578688	0.187904	43127	EARP and GARP complex-interacting protein 1 OS=Mus musculus OX=10090 GN=Eipr1 PE=1 SV=2
2283	TRUE	P51880|FABP7_MOUSE	41.07	29.55	3	3		2946.44	2675.41	2912.35	2844.73	1719.56	1694.41	1681.35	1698.44	0.597046	0.000182886	14893	Fatty acid-binding protein, brain OS=Mus musculus OX=10090 GN=Fabp7 PE=1 SV=2
61	TRUE	P33173|KIF1A_MOUSE	9.96	13.81	34	23		3965.01	3253.26	4178.13	3798.8	3201.34	3267.36	3159.04	3209.24	0.844806	0.104226	191725	Kinesin-like protein KIF1A OS=Mus musculus OX=10090 GN=Kif1a PE=1 SV=2
1654	TRUE	Q9JHU9|INO1_MOUSE	10.59	9.16	5	5		924.985	772.864	901.453	866.434	269.605	680.377	524.818	491.6	0.567383	0.0436024	60932	Inositol-3-phosphate synthase 1 OS=Mus musculus OX=10090 GN=Isyna1 PE=1 SV=1
62	TRUE	P70336|ROCK2_MOUSE	23.52	27.23	37	37		5172.29	5685.56	4523.18	5127.01	3239.32	3528.11	3407.56	3391.66	0.661528	0.00745345	160586	Rho-associated protein kinase 2 OS=Mus musculus OX=10090 GN=Rock2 PE=1 SV=1
44	FALSE	Q64324|STXB2_MOUSE	40.56	1.18	1	1		5412.17	5515.31	5712.68	5546.72	2563.98	2817.61	2937.75	2773.11	0.499956	3.95033e-05	66357	Syntaxin-binding protein 2 OS=Mus musculus OX=10090 GN=Stxbp2 PE=1 SV=1
2526	TRUE	Q5SV85|SYNRG_MOUSE	7.47	1.68	1	1		122.807	195.113	148.306	155.408	111.263	114.261	31.0589	85.5275	0.55034	0.112838	139616	Synergin gamma OS=Mus musculus OX=10090 GN=Synrg PE=1 SV=1
2876	TRUE	P62082|RS7_MOUSE	30.16	8.76	2	2		625.061	673.536	736.207	678.268	251.864	186.917	159.006	199.262	0.293781	0.000347571	22127	40S ribosomal protein S7 OS=Mus musculus OX=10090 GN=Rps7 PE=1 SV=1
1771	TRUE	Q99KP6|PRP19_MOUSE	27.83	9.52	5	5		2218.33	2387.66	2163.93	2256.64	1531.02	1683.88	1480.77	1565.22	0.693606	0.00160518	55239	Pre-mRNA-processing factor 19 OS=Mus musculus OX=10090 GN=Prpf19 PE=1 SV=1
1197	TRUE	Q8C052|MAP1S_MOUSE	18.03	7.09	6	6		9831.9	10445	9645.93	9974.26	9124.86	9011.73	8911.99	9016.19	0.903946	0.0183633	102939	Microtubule-associated protein 1S OS=Mus musculus OX=10090 GN=Map1s PE=1 SV=2
3436	TRUE	Q9D1K7|CT027_MOUSE	11.78	8.05	1	1		418.504	409.313	404.976	410.931	201.385	177.791	40.6196	139.932	0.340525	0.00573088	19476	UPF0687 protein C20orf27 homolog OS=Mus musculus OX=10090 PE=1 SV=3
2485	TRUE	P62830|RL23_MOUSE	43.6	16.43	2	2		875.92	879.304	1035.4	930.208	200.669	161.756	167.195	176.54	0.189786	0.00015279	14865	60S ribosomal protein L23 OS=Mus musculus OX=10090 GN=Rpl23 PE=1 SV=1
1860	TRUE	Q99KK7|DPP3_MOUSE	12.76	6.1	3	3		703.654	905.612	597.127	735.465	471.587	502.254	293.703	422.515	0.574487	0.0483528	82898	Dipeptidyl peptidase 3 OS=Mus musculus OX=10090 GN=Dpp3 PE=1 SV=2
2229	TRUE	O88696|CLPP_MOUSE	13.71	8.09	2	2		505.888	419.488	538.989	488.122	54.8326	131.578	266.779	151.063	0.309479	0.00919614	29800	ATP-dependent Clp protease proteolytic subunit, mitochondrial OS=Mus musculus OX=10090 GN=Clpp PE=1 SV=1
1942	TRUE	Q60829|PPR1B_MOUSE	9.35	39.18	4	4		1059.37	1362.92	1362.47	1261.59	1036.42	760.518	1082.29	959.742	0.760743	0.101636	21781	Protein phosphatase 1 regulatory subunit 1B OS=Mus musculus OX=10090 GN=Ppp1r1b PE=1 SV=2
2111	TRUE	P14106|C1QB_MOUSE	39.27	15.42	3	3		977.904	932.833	825.353	912.03	362.026	321.02	312.426	331.824	0.36383	0.000263613	26717	Complement C1q subcomponent subunit B OS=Mus musculus OX=10090 GN=C1qb PE=1 SV=2
1118	TRUE	O08547|SC22B_MOUSE	3.74	38.14	8	8		12169.8	2627.78	5019.21	6605.6	8195.78	2649.93	958.493	3934.73	0.595666	0.499873	24741	Vesicle-trafficking protein SEC22b OS=Mus musculus OX=10090 GN=Sec22b PE=1 SV=3
1100	TRUE	P62823|RAB3C_MOUSE	69.23	31.28	6	5		4575.38	4560.91	4633.54	4589.94	1564.84	1590.66	1628.62	1594.7	0.347434	5.20185e-08	25872	Ras-related protein Rab-3C OS=Mus musculus OX=10090 GN=Rab3c PE=1 SV=1
1750	TRUE	Q8BGU5|CCNY_MOUSE	5.41	18.77	5	5		565.058	447.757	438.54	483.785	451.244	806.493	604.857	620.864	1.28335	0.283057	39395	Cyclin-Y OS=Mus musculus OX=10090 GN=Ccny PE=1 SV=1
2962	TRUE	Q6PFQ7|RASL2_MOUSE	23.01	2.24	2	2	N-ethylmaleimide on cysteines	6967.51	6619.85	6001.68	6529.68	4522.56	4428.16	3679.57	4210.1	0.644763	0.00395034	90060	Ras GTPase-activating protein 4 OS=Mus musculus OX=10090 GN=Rasa4 PE=1 SV=1
3200	TRUE	P62858|RS28_MOUSE	27.09	30.43	2	2		1588.5	1957.18	1759.27	1768.31	257.191	471.336	471.357	399.961	0.226182	0.000436857	7841	40S ribosomal protein S28 OS=Mus musculus OX=10090 GN=Rps28 PE=1 SV=1
3198	TRUE	Q9JME7|TPC2L_MOUSE	16.08	6.47	1	1		130.928	211.127	189.795	177.283	72.6163	60.1749	109.112	80.6346	0.454834	0.0263682	16019	Trafficking protein particle complex subunit 2-like protein OS=Mus musculus OX=10090 GN=Trappc2l PE=1 SV=1
1038	TRUE	P62897|CYC_MOUSE	30.98	61.9	7	7	Oxidation (M)	26298.7	25830.7	25828.4	25986	21559.5	21574.2	20188.5	21107.4	0.812263	0.000550915	11605	Cytochrome c, somatic OS=Mus musculus OX=10090 GN=Cycs PE=1 SV=2
1106	TRUE	Q9WV55|VAPA_MOUSE	39.98	38.55	9	8		6949.94	7018.95	8046.24	7338.38	3397.18	3174.74	3174.53	3248.82	0.442716	0.000350531	27855	Vesicle-associated membrane protein-associated protein A OS=Mus musculus OX=10090 GN=Vapa PE=1 SV=2
2774	TRUE	P43024|CX6A1_MOUSE	26.36	14.41	1	1		2294.41	2419.55	2603.58	2439.18	412.501	699.965	782.572	631.679	0.258972	0.000229719	12352	Cytochrome c oxidase subunit 6A1, mitochondrial OS=Mus musculus OX=10090 GN=Cox6a1 PE=1 SV=2
659	TRUE	Q9WTX6|CUL1_MOUSE	8.67	17.53	13	13		931.111	728.065	736.272	798.483	709.89	510.751	668.748	629.796	0.788741	0.133933	89692	Cullin-1 OS=Mus musculus OX=10090 GN=Cul1 PE=1 SV=1
2924	TRUE	Q60967|PAPS1_MOUSE	26.71	4.17	2	2		139.767	184.483	184.884	169.711	82.3043	88.0607	87.4973	85.9541	0.506473	0.0051479	70794	Bifunctional 3'-phosphoadenosine 5'-phosphosulfate synthase 1 OS=Mus musculus OX=10090 GN=Papss1 PE=1 SV=1
2257	TRUE	Q99KX1|MLF2_MOUSE	66.83	18.22	4	4		3034.41	2981.58	3119.97	3045.32	785.196	819.117	794.765	799.693	0.262597	7.0262e-07	28055	Myeloid leukemia factor 2 OS=Mus musculus OX=10090 GN=Mlf2 PE=1 SV=1
792	TRUE	Q8R2Y0|ABHD6_MOUSE	18.38	28.27	8	8		1153.02	1014.8	2119.22	1429.01	531.692	545.565	405.164	494.14	0.345791	0.0558606	38205	Monoacylglycerol lipase ABHD6 OS=Mus musculus OX=10090 GN=Abhd6 PE=1 SV=1
3605	TRUE	Q6PB97|FXL19_MOUSE	13.86	1.34	1	1		1206.52	1135.67	1077.58	1139.92	895.377	631.685	893.005	806.689	0.70767	0.0248181	73788	F-box/LRR-repeat protein 19 OS=Mus musculus OX=10090 GN=Fbxl19 PE=2 SV=1
286	TRUE	Q501J6|DDX17_MOUSE	46.53	22.46	19	13		2927.06	2905.1	3007.75	2946.64	1730.15	1601.51	1634.59	1655.41	0.561797	1.29493e-05	72399	Probable ATP-dependent RNA helicase DDX17 OS=Mus musculus OX=10090 GN=Ddx17 PE=1 SV=1
186	TRUE	P17182|ENOA_MOUSE	52.75	48.16	21	19	Oxidation (M)	122940	123629	117433	121334	67878.8	68668.2	69395.7	68647.6	0.565773	1.25571e-05	47141	Alpha-enolase OS=Mus musculus OX=10090 GN=Eno1 PE=1 SV=3
1421	TRUE	Q63810|CANB1_MOUSE	34.17	42.35	7	7		31756	28903.8	29326.8	29995.5	12884.9	13302.6	10424.1	12203.9	0.406857	0.000147564	19300	Calcineurin subunit B type 1 OS=Mus musculus OX=10090 GN=Ppp3r1 PE=1 SV=3
3722	TRUE	Q684R7|FREM1_MOUSE	8.04	0.41	1	1		389.64	493.418	490.682	457.913	308.719	419.212	388.691	372.207	0.812834	0.145165	244544	FRAS1-related extracellular matrix protein 1 OS=Mus musculus OX=10090 GN=Frem1 PE=1 SV=1
2763	TRUE	Q5FW85|ECM2_MOUSE	5.43	2.09	1	1	Oxidation (M)	9954.4	10379.1	3183.71	7839.08	4289.83	4699.95	3850.94	4280.24	0.546013	0.203521	76676	Extracellular matrix protein 2 OS=Mus musculus OX=10090 GN=Ecm2 PE=1 SV=1
2417	TRUE	Q8R317|UBQL1_MOUSE	43.96	2.75	2	1		199.587	196.991	193.768	196.782	64.499	68.8167	77.0958	70.1372	0.35642	6.30071e-06	61976	Ubiquilin-1 OS=Mus musculus OX=10090 GN=Ubqln1 PE=1 SV=1
1879	TRUE	O54988|SLK_MOUSE	12.23	3.24	3	3		963.641	982.562	1092.5	1012.9	890.867	489.502	517.298	632.556	0.624498	0.0484625	141457	STE20-like serine/threonine-protein kinase OS=Mus musculus OX=10090 GN=Slk PE=1 SV=2
435	TRUE	Q3UPL0|SC31A_MOUSE	21.56	10.65	12	12		1032.9	951.077	997.012	993.663	759.305	845.616	823.774	809.565	0.814728	0.00631876	133569	Protein transport protein Sec31A OS=Mus musculus OX=10090 GN=Sec31a PE=1 SV=2
2645	TRUE	Q9CT10|RANB3_MOUSE	44.12	3.05	1	1		46.3354	81.116	94.0095	73.8203	18.6569	18.6569	18.6569	18.6569	0.252734	0.0179249	52573	Ran-binding protein 3 OS=Mus musculus OX=10090 GN=Ranbp3 PE=1 SV=2
149	TRUE	O35643|AP1B1_MOUSE	32.84	16.86	26	14		7798.79	7818.44	7190.07	7602.43	4540.76	4700.36	4045.01	4428.71	0.582539	0.000372253	103935	AP-1 complex subunit beta-1 OS=Mus musculus OX=10090 GN=Ap1b1 PE=1 SV=2
78	TRUE	Q8C419|GP158_MOUSE	3.06	26.92	30	30	Oxidation (M)	10749.6	9965.45	9897.52	10204.2	9851.85	9817.84	10249.4	9973.02	0.977345	0.492684	134426	Probable G-protein coupled receptor 158 OS=Mus musculus OX=10090 GN=Gpr158 PE=1 SV=2
330	TRUE	B2RQC6|PYR1_MOUSE	3.96	3.78	8	8		745.145	1011.24	680.652	812.346	816.212	882.225	1067.54	921.991	1.13497	0.433558	243238	CAD protein OS=Mus musculus OX=10090 GN=Cad PE=1 SV=1
1122	TRUE	Q61831|MK10_MOUSE	13.52	1.72	6	1		8629.53	8368.49	8944.91	8647.64	8049.2	8140.12	8250.06	8146.46	0.942044	0.0468675	52532	Mitogen-activated protein kinase 10 OS=Mus musculus OX=10090 GN=Mapk10 PE=1 SV=2
1528	TRUE	Q6PDL0|DC1L2_MOUSE	25.12	12.2	5	5		1971.55	1591.85	1602.11	1721.83	606.297	569.905	863.552	679.918	0.39488	0.00257317	54218	Cytoplasmic dynein 1 light intermediate chain 2 OS=Mus musculus OX=10090 GN=Dync1li2 PE=1 SV=2
1496	TRUE	Q9QXG4|ACSA_MOUSE	16.95	6.42	5	5		1060.49	1158.94	1440.72	1220.05	643.448	844.955	809.418	765.94	0.627795	0.0249048	78862	Acetyl-coenzyme A synthetase, cytoplasmic OS=Mus musculus OX=10090 GN=Acss2 PE=1 SV=2
1749	TRUE	Q61735|CD47_MOUSE	9.77	9.9	3	3	Oxidation (M)	1721.85	1696.89	1539.43	1652.72	818.47	860.599	1609.43	1096.17	0.663248	0.101952	33098	Leukocyte surface antigen CD47 OS=Mus musculus OX=10090 GN=Cd47 PE=1 SV=2
2464	TRUE	Q9CRA7|ATP5S_MOUSE	5.02	5	1	1		172.43	77.4506	97.6662	115.849	75.879	101.694	67.2799	81.6178	0.704518	0.327051	23275	ATP synthase subunit s, mitochondrial OS=Mus musculus OX=10090 GN=Dmac2l PE=1 SV=1
109	TRUE	P58252|EF2_MOUSE	31.97	31	29	28	Oxidation (M)	20093.1	20329.8	19599.2	20007.4	14163.8	14840	15641.7	14881.8	0.743817	0.000429701	95314	Elongation factor 2 OS=Mus musculus OX=10090 GN=Eef2 PE=1 SV=2
3104	TRUE	Q8K1X1|WDR11_MOUSE	3.28	0.82	1	1		83.1871	77.5051	99.1943	86.6288	592.966	54.6382	18.6569	222.087	2.56366	0.506456	135937	WD repeat-containing protein 11 OS=Mus musculus OX=10090 GN=Wdr11 PE=1 SV=1
1664	TRUE	Q91W90|TXND5_MOUSE	22.38	11.51	5	5		1041.02	816.472	911.754	923.081	326.585	390.052	519.717	412.118	0.446459	0.00409233	46415	Thioredoxin domain-containing protein 5 OS=Mus musculus OX=10090 GN=Txndc5 PE=1 SV=2
2466	TRUE	P0C028|NUD11_MOUSE	13.81	11.59	2	2		414.685	400.995	522.072	445.917	186.493	274.276	327.122	262.63	0.588967	0.0308755	18593	Diphosphoinositol polyphosphate phosphohydrolase 3-beta OS=Mus musculus OX=10090 GN=Nudt11 PE=1 SV=1
3460	TRUE	Q3V1U8|ELMD1_MOUSE	27.25	4.6	1	1		310.995	376.573	355.873	347.814	188.925	207.754	219.92	205.533	0.590929	0.00263485	38034	ELMO domain-containing protein 1 OS=Mus musculus OX=10090 GN=Elmod1 PE=1 SV=2
3650	TRUE	Q9DCR2|AP3S1_MOUSE	13.66	7.77	1	1		450.293	491.123	441.585	461	179.744	73.0065	262.677	171.809	0.372687	0.00710428	21732	AP-3 complex subunit sigma-1 OS=Mus musculus OX=10090 GN=Ap3s1 PE=1 SV=2
3319	TRUE	Q8R2V5|ADAP2_MOUSE	29	2.62	1	1		173.889	216.167	148.801	179.619	64.8747	53.7966	68.0512	62.2408	0.346516	0.00430704	43989	Arf-GAP with dual PH domain-containing protein 2 OS=Mus musculus OX=10090 GN=Adap2 PE=1 SV=1
141	TRUE	Q61290|CAC1E_MOUSE	8.85	13.86	29	28		3721.7	3737.66	3941.71	3800.36	3426.5	3768.8	3484.45	3559.92	0.936732	0.131929	257236	Voltage-dependent R-type calcium channel subunit alpha-1E OS=Mus musculus OX=10090 GN=Cacna1e PE=1 SV=1
1791	TRUE	Q60770|STXB3_MOUSE	0.12	3.38	2	2		235.314	236.403	170.149	213.955	186.318	248.854	201.096	212.09	0.99128	0.951647	67942	Syntaxin-binding protein 3 OS=Mus musculus OX=10090 GN=Stxbp3 PE=1 SV=1
2446	TRUE	P49586|PCY1A_MOUSE	5.57	3.27	1	1		85.2752	161.344	223.976	156.865	86.6392	98.3279	118.007	100.991	0.643811	0.24591	41667	Choline-phosphate cytidylyltransferase A OS=Mus musculus OX=10090 GN=Pcyt1a PE=1 SV=1
2029	TRUE	Q9QYB1|CLIC4_MOUSE	43.59	20.95	5	5		2353.08	2365.27	2166.12	2294.82	870.647	773.527	890.808	844.994	0.368217	3.98503e-05	28729	Chloride intracellular channel protein 4 OS=Mus musculus OX=10090 GN=Clic4 PE=1 SV=3
1494	FALSE	P06467|HBAZ_MOUSE	6.4	4.93	1	1		2122.31	2154.97	1991.62	2089.63	2059.46	1743.29	1994.76	1932.5	0.924803	0.221411	16235	Hemoglobin subunit zeta OS=Mus musculus OX=10090 GN=Hbz PE=2 SV=2
87	FALSE	Q80TH2|ERBIN_MOUSE	36.8	1.14	2	2		2155.62	2231.55	2333.93	2240.37	3224.53	3278.3	3109.79	3204.21	1.43021	0.000177003	157248	Erbin OS=Mus musculus OX=10090 GN=Erbin PE=1 SV=3
639	FALSE	Q9JHW9|AL1A3_MOUSE	16.48	1.56	3	1		502.718	425.766	505.338	477.941	154.569	129.502	303.614	195.895	0.409873	0.00945811	56157	Aldehyde dehydrogenase family 1 member A3 OS=Mus musculus OX=10090 GN=Aldh1a3 PE=1 SV=1
2204	TRUE	Q9Z127|LAT1_MOUSE	5	8.4	4	4		864.987	776.146	1166.65	935.927	664.94	955.291	695.403	771.878	0.82472	0.335103	55872	Large neutral amino acids transporter small subunit 1 OS=Mus musculus OX=10090 GN=Slc7a5 PE=1 SV=2
2210	TRUE	Q61425|HCDH_MOUSE	28.66	5.1	2	2		623.279	720.233	759.169	700.894	306.688	368.565	375.47	350.241	0.499706	0.00158231	34464	Hydroxyacyl-coenzyme A dehydrogenase, mitochondrial OS=Mus musculus OX=10090 GN=Hadh PE=1 SV=2
1176	TRUE	P43277|H13_MOUSE	3.67	7.24	9	1	Acetylation (Protein N-term)	3156.73	1603.61	2436.01	2398.79	2365.97	500.536	2404.28	1756.93	0.732424	0.452532	22100	Histone H1.3 OS=Mus musculus OX=10090 GN=H1-3 PE=1 SV=2
912	FALSE	A2AQW0|M3K15_MOUSE	12.13	0.98	1	1		125.102	109.404	108.824	114.443	84.5131	101.51	98.6632	94.8954	0.829191	0.0593618	149327	Mitogen-activated protein kinase kinase kinase 15 OS=Mus musculus OX=10090 GN=Map3k15 PE=1 SV=1
1586	TRUE	P70333|HNRH2_MOUSE	34.6	2.45	5	1		1721.43	1428.77	1314.36	1488.19	447.174	477.447	542.83	489.15	0.328689	0.00130681	49280	Heterogeneous nuclear ribonucleoprotein H2 OS=Mus musculus OX=10090 GN=Hnrnph2 PE=1 SV=1
79	TRUE	Q99KI0|ACON_MOUSE	56.95	49.36	35	35	Oxidation (M)	98098.3	95102.2	95642.3	96280.9	61207.5	60913.7	61983.6	61368.3	0.637387	3.64006e-06	85464	Aconitate hydratase, mitochondrial OS=Mus musculus OX=10090 GN=Aco2 PE=1 SV=1
834	TRUE	Q8CIB5|FERM2_MOUSE	20.79	13.09	8	8		1132.07	1169.87	1040.32	1114.09	833.359	929.283	893.76	885.468	0.794793	0.00861534	77800	Fermitin family homolog 2 OS=Mus musculus OX=10090 GN=Fermt2 PE=1 SV=1
1075	TRUE	Q80UM3|NAA15_MOUSE	3.6	5.78	5	5		584.702	543.101	392.595	506.799	463.229	452.657	430.881	448.922	0.885799	0.383048	100961	N-alpha-acetyltransferase 15, NatA auxiliary subunit OS=Mus musculus OX=10090 GN=Naa15 PE=1 SV=1
459	TRUE	Q5SSL4|ABR_MOUSE	12.7	17.58	15	13	Acetylation (Protein N-term)	4947.76	4632.81	4482.43	4687.66	2620.22	3543.33	3958.08	3373.88	0.719735	0.0348691	97667	Active breakpoint cluster region-related protein OS=Mus musculus OX=10090 GN=Abr PE=1 SV=1
2472	TRUE	P97927|LAMA4_MOUSE	1.28	0.61	1	1		63.4527	61.3279	71.1261	65.3022	80.2916	75.697	52.6663	69.5516	1.06507	0.663116	201819	Laminin subunit alpha-4 OS=Mus musculus OX=10090 GN=Lama4 PE=1 SV=2
667	TRUE	Q8BP47|SYNC_MOUSE	14.73	20.04	12	12		4862.18	5103.24	4224.81	4730.08	3853.12	2485.04	2550.93	2963.03	0.626424	0.0268018	64279	Asparagine--tRNA ligase, cytoplasmic OS=Mus musculus OX=10090 GN=NARS1 PE=1 SV=2
899	TRUE	P21107|TPM3_MOUSE	28.44	8.42	10	3		2195.17	2417.65	2722.51	2445.11	375.313	406.437	706.277	496.009	0.202857	0.000466136	32994	Tropomyosin alpha-3 chain OS=Mus musculus OX=10090 GN=Tpm3 PE=1 SV=3
544	FALSE	Q5SUA5|MYO1G_MOUSE	19.49	1.27	1	1		220.985	156.948	221.08	199.671	119.249	109.638	90.7684	106.552	0.533637	0.0153605	117227	Unconventional myosin-Ig OS=Mus musculus OX=10090 GN=Myo1g PE=1 SV=1
2305	TRUE	P53986|MOT1_MOUSE	0.32	4.46	2	2		908.822	994.367	759.991	887.727	1044.73	558.588	1100.67	901.328	1.01532	0.944995	53267	Monocarboxylate transporter 1 OS=Mus musculus OX=10090 GN=Slc16a1 PE=1 SV=1
2196	TRUE	Q61466|SMRD1_MOUSE	10.97	1.36	1	1		131.118	165.341	109.619	135.359	108.906	71.2783	92.2713	90.8186	0.670945	0.0848234	58245	SWI/SNF-related matrix-associated actin-dependent regulator of chromatin subfamily D member 1 OS=Mus musculus OX=10090 GN=Smarcd1 PE=1 SV=3
1569	FALSE	O70551|SRPK1_MOUSE	6.74	1.39	1	1		285.712	238.324	258.894	260.977	427.611	560.791	235.526	407.976	1.56327	0.198196	73088	SRSF protein kinase 1 OS=Mus musculus OX=10090 GN=Srpk1 PE=1 SV=2
110	TRUE	Q8BZ98|DYN3_MOUSE	13.17	18.42	26	14		2415.38	3153.63	2978.44	2849.15	2318.46	2081.8	2251.99	2217.42	0.778273	0.0538434	97190	Dynamin-3 OS=Mus musculus OX=10090 GN=Dnm3 PE=1 SV=1
511	TRUE	Q9R1Q8|TAGL3_MOUSE	37.8	49.25	13	10	Oxidation (M)	20094.8	21632.7	21934	21220.5	7153.33	6692.78	5421.01	6422.38	0.30265	4.3174e-05	22471	Transgelin-3 OS=Mus musculus OX=10090 GN=Tagln3 PE=1 SV=1
140	TRUE	Q91V14|S12A5_MOUSE	49.1	19.42	26	20	Oxidation (M)	10474.9	10671.4	10559.5	10568.6	6518.95	6840.4	6847.79	6735.72	0.637334	6.20618e-06	126271	Solute carrier family 12 member 5 OS=Mus musculus OX=10090 GN=Slc12a5 PE=1 SV=2
1057	FALSE	Q64338|PDE1C_MOUSE	14.9	1.27	2	1		724.051	972.231	871.468	855.917	565.546	286.973	218.763	357.094	0.417207	0.0176915	80290	Dual specificity calcium/calmodulin-dependent 3',5'-cyclic nucleotide phosphodiesterase 1C OS=Mus musculus OX=10090 GN=Pde1c PE=1 SV=2
123	TRUE	O70133|DHX9_MOUSE	9.46	17.9	24	24	Oxidation (M)	6772.57	6132.2	5838.23	6247.67	5761.66	5663.51	5690.69	5705.29	0.913187	0.122199	149475	ATP-dependent RNA helicase A OS=Mus musculus OX=10090 GN=Dhx9 PE=1 SV=2
798	TRUE	Q8BLY2|SYTC2_MOUSE	19.9	9.87	9	8	Acetylation (Protein N-term)	1341.42	1027.94	1264.24	1211.2	465.078	651.331	336.657	484.355	0.399898	0.00520356	91318	Threonine--tRNA ligase 2, cytoplasmic OS=Mus musculus OX=10090 GN=Tars3 PE=1 SV=1
2942	TRUE	Q61074|PPM1G_MOUSE	0.34	4.24	2	2		193.982	167.452	168.937	176.79	178.649	187.682	166.61	177.647	1.00485	0.939185	58728	Protein phosphatase 1G OS=Mus musculus OX=10090 GN=Ppm1g PE=1 SV=3
1091	TRUE	Q99LC3|NDUAA_MOUSE	74.32	25.63	7	7	Oxidation (M)	10266.9	10182.3	10224	10224.4	4301.44	4192.56	4240.79	4244.93	0.415178	1.18356e-08	40603	NADH dehydrogenase [ubiquinone] 1 alpha subcomplex subunit 10, mitochondrial OS=Mus musculus OX=10090 GN=Ndufa10 PE=1 SV=1
827	TRUE	Q9CY27|TECR_MOUSE	29.23	20.13	8	8		4558.14	4879.35	4692.02	4709.84	3237.43	3568.22	3562.38	3456.01	0.733786	0.000948238	36090	Very-long-chain enoyl-CoA reductase OS=Mus musculus OX=10090 GN=Tecr PE=1 SV=1
3391	TRUE	Q91V64|ISOC1_MOUSE	87.97	5.05	1	1		18.6569	52.6618	52.1618	41.1602	18.6569	18.6569	18.6569	18.6569	0.453275	0.116138	32033	Isochorismatase domain-containing protein 1 OS=Mus musculus OX=10090 GN=Isoc1 PE=1 SV=1
930	TRUE	P68181|KAPCB_MOUSE	14.44	11.68	9	3		1474.41	1494.68	552.902	1174	274.758	467.202	313.294	351.751	0.299619	0.05998	40708	cAMP-dependent protein kinase catalytic subunit beta OS=Mus musculus OX=10090 GN=Prkacb PE=1 SV=2
1899	TRUE	Q9D6Z1|NOP56_MOUSE	29.69	7.93	4	4		754.528	800.444	947.944	834.305	396.411	352.848	429.194	392.818	0.470832	0.0021054	64464	Nucleolar protein 56 OS=Mus musculus OX=10090 GN=Nop56 PE=1 SV=2
1005	TRUE	Q8R570|SNP47_MOUSE	31.82	27.85	9	9		2029.28	1928.39	1844.6	1934.09	706.565	463.032	509.891	559.829	0.289454	0.000115694	46524	Synaptosomal-associated protein 47 OS=Mus musculus OX=10090 GN=Snap47 PE=1 SV=1
390	TRUE	Q8BGZ7|K2C75_MOUSE	23.02	5.08	19	2	Oxidation (M)	1238.12	1462.78	1819.02	1506.64	369.573	610.84	570.856	517.09	0.343207	0.00587458	59741	Keratin, type II cytoskeletal 75 OS=Mus musculus OX=10090 GN=Krt75 PE=1 SV=1
250	TRUE	Q62417|SRBS1_MOUSE	21.4	14.42	17	17		2593.71	2454.86	2588.47	2545.68	1766.37	2068.26	2028.04	1954.22	0.767662	0.00488405	143070	Sorbin and SH3 domain-containing protein 1 OS=Mus musculus OX=10090 GN=Sorbs1 PE=1 SV=2
2552	TRUE	Q8BL48|UNK_MOUSE	15.46	1.36	2	1		133.507	128.419	139.135	133.687	95.3166	56.2037	86.0257	79.182	0.592293	0.011086	88058	RING finger protein unkempt homolog OS=Mus musculus OX=10090 GN=Unk PE=1 SV=1
99	TRUE	Q6P4T2|U520_MOUSE	1.61	12.41	26	26		1791.83	2285.17	1673.68	1916.89	1768.24	1531.37	2130.03	1809.88	0.944174	0.697045	244547	U5 small nuclear ribonucleoprotein 200 kDa helicase OS=Mus musculus OX=10090 GN=Snrnp200 PE=1 SV=1
1485	TRUE	Q9QYI3|DNJC7_MOUSE	14.81	10.73	5	5		881.64	744.619	604.763	743.674	415.677	415.797	213.048	348.174	0.468181	0.0194532	56476	DnaJ homolog subfamily C member 7 OS=Mus musculus OX=10090 GN=Dnajc7 PE=1 SV=2
1328	TRUE	Q99LC5|ETFA_MOUSE	51.92	27.93	7	7		3105.12	3032.68	2985.06	3040.95	851.382	859.818	958.462	889.887	0.292634	1.60841e-06	35009	Electron transfer flavoprotein subunit alpha, mitochondrial OS=Mus musculus OX=10090 GN=Etfa PE=1 SV=2
2558	TRUE	Q80YA3|DDHD1_MOUSE	1.48	1.83	1	1		4551.87	6382.27	123.88	3686.01	2698.15	2855.55	2105.9	2553.2	0.692673	0.577696	61823	Phospholipase DDHD1 OS=Mus musculus OX=10090 GN=Ddhd1 PE=1 SV=1
463	TRUE	Q8BVE3|VATH_MOUSE	42.99	37.27	15	15		19012.2	18622.4	17809	18481.2	10580.3	10880.5	10035.1	10498.6	0.56807	5.0595e-05	55855	V-type proton ATPase subunit H OS=Mus musculus OX=10090 GN=Atp6v1h PE=1 SV=1
1539	TRUE	Q05816|FABP5_MOUSE	60.88	22.96	4	4	Oxidation (M)	8995.53	8641.71	8718.47	8785.23	3404.84	3502.57	3558.71	3488.71	0.39711	1.39894e-06	15137	Fatty acid-binding protein 5 OS=Mus musculus OX=10090 GN=Fabp5 PE=1 SV=3
371	TRUE	P62761|VISL1_MOUSE	64.72	45.55	14	10	Oxidation (M)	58826.4	60746	58831.8	59468.1	17671.2	17607.5	18454	17910.9	0.301185	4.67163e-07	22142	Visinin-like protein 1 OS=Mus musculus OX=10090 GN=Vsnl1 PE=1 SV=2
975	TRUE	Q8BVI4|DHPR_MOUSE	40.49	34.44	6	6	Oxidation (M)	10696.1	11079.4	9695.23	10490.3	3064.61	3714.15	3525.02	3434.59	0.327408	0.000101372	25570	Dihydropteridine reductase OS=Mus musculus OX=10090 GN=Qdpr PE=1 SV=2
2242	TRUE	Q9DCC4|P5CR3_MOUSE	20.37	14.6	3	3		953.405	1221.63	1183.76	1119.6	693.727	755.836	782.061	743.875	0.664412	0.0128595	28721	Pyrroline-5-carboxylate reductase 3 OS=Mus musculus OX=10090 GN=Pycr3 PE=1 SV=2
2049	TRUE	Q9JL56|GDE1_MOUSE	1.86	2.72	1	1		277.815	117.289	243.287	212.797	329.351	195.897	195.757	240.335	1.12941	0.698076	37629	Glycerophosphodiester phosphodiesterase 1 OS=Mus musculus OX=10090 GN=Gde1 PE=1 SV=1
2280	TRUE	Q80TL1|ADCY2_MOUSE	11.15	3.03	3	3		723.756	529.392	633.334	628.827	12828.6	1714.07	1545.59	5362.76	8.5282	0.273611	123270	Adenylate cyclase type 2 OS=Mus musculus OX=10090 GN=Adcy2 PE=1 SV=2
1639	TRUE	P62754|RS6_MOUSE	19.16	16.87	4	4		3272.86	3649.37	4440.51	3787.58	1747.91	2418.08	2231.29	2132.43	0.563005	0.0141391	28681	40S ribosomal protein S6 OS=Mus musculus OX=10090 GN=Rps6 PE=1 SV=1
3820	TRUE	Q3UGS4|MCRI1_MOUSE	16.29	11.34	1	1		125.857	93.527	112.96	110.781	18.6569	69.4193	59.857	49.3111	0.445121	0.0277961	11101	Mapk-regulated corepressor-interacting protein 1 OS=Mus musculus OX=10090 GN=Mcrip1 PE=1 SV=1
86	TRUE	P70206|PLXA1_MOUSE	3.73	14.1	32	24		3126.88	3102.68	3005.42	3078.33	3136.43	2237.17	3090.07	2821.22	0.916479	0.432184	211099	Plexin-A1 OS=Mus musculus OX=10090 GN=Plxna1 PE=1 SV=1
442	TRUE	Q80Y24|PRIC2_MOUSE	16.99	22.13	16	16		3364.03	3039.84	2945.79	3116.56	2390.1	1571.37	1579.59	1847.02	0.592647	0.0132977	95781	Prickle-like protein 2 OS=Mus musculus OX=10090 GN=Prickle2 PE=1 SV=3
657	TRUE	Q8BL65|ABLM2_MOUSE	41.25	19.12	8	8		5873.49	5906.15	5960.46	5913.37	2642.56	2550.33	2227.11	2473.33	0.418261	1.15689e-05	68107	Actin-binding LIM protein 2 OS=Mus musculus OX=10090 GN=Ablim2 PE=1 SV=1
1824	TRUE	Q9CZ44|NSF1C_MOUSE	17.01	17.84	5	5		876.856	1007.77	963.562	949.395	299.476	484.036	587.594	457.035	0.481397	0.00602187	40710	NSFL1 cofactor p47 OS=Mus musculus OX=10090 GN=Nsfl1c PE=1 SV=1
940	TRUE	P00405|COX2_MOUSE	49.62	30.84	6	6	Oxidation (M)	82965.1	76775.8	76432.9	78724.6	36328.8	36167.7	37260.6	36585.7	0.464731	3.9944e-05	25976	Cytochrome c oxidase subunit 2 OS=Mus musculus OX=10090 GN=Mtco2 PE=1 SV=1
117	TRUE	Q920I9|WDR7_MOUSE	23.86	24.31	32	32		10608.1	10617.7	9853.42	10359.7	8749.79	8777.77	9021.36	8849.64	0.854235	0.00484567	163450	WD repeat-containing protein 7 OS=Mus musculus OX=10090 GN=Wdr7 PE=1 SV=3
2723	TRUE	P61079|UB2D3_MOUSE	65.5	7.48	1	1		7662.89	7702.76	7644.74	7670.13	4009.92	3917.24	3883.53	3936.9	0.513277	9.14539e-08	16687	Ubiquitin-conjugating enzyme E2 D3 OS=Mus musculus OX=10090 GN=Ube2d3 PE=1 SV=1
2929	TRUE	Q8BHL8|PSMF1_MOUSE	8.01	4.43	1	1		154.652	153.982	193.342	167.325	116.023	128.768	36.6131	93.8015	0.560594	0.080733	29664	Proteasome inhibitor PI31 subunit OS=Mus musculus OX=10090 GN=Psmf1 PE=1 SV=1
2004	TRUE	Q9D0M1|KPRA_MOUSE	0.03	7.87	4	2		157.434	98.944	229.25	161.876	202.806	153.372	115.757	157.312	0.971804	0.924649	39432	Phosphoribosyl pyrophosphate synthase-associated protein 1 OS=Mus musculus OX=10090 GN=Prpsap1 PE=1 SV=1
175	TRUE	P70207|PLXA2_MOUSE	8.89	4.59	21	8		881.73	1028.87	929.341	946.648	883.409	808.313	871.534	854.419	0.902573	0.13422	211535	Plexin-A2 OS=Mus musculus OX=10090 GN=Plxna2 PE=1 SV=2
2786	TRUE	Q3UHD2|GFOD1_MOUSE	39.79	2.56	1	1		4329.2	4012.36	3919.16	4086.91	2365.96	2497.53	2419.1	2427.53	0.593978	0.000216068	43286	Glucose-fructose oxidoreductase domain-containing protein 1 OS=Mus musculus OX=10090 GN=Gfod1 PE=1 SV=1
933	TRUE	P24549|AL1A1_MOUSE	12.16	12.38	7	5		837.558	1370.37	1431.06	1213	318.88	586.001	773.306	559.396	0.461168	0.0468245	54468	Aldehyde dehydrogenase 1A1 OS=Mus musculus OX=10090 GN=Aldh1a1 PE=1 SV=5
3980	TRUE	B1AVZ0|UPP_MOUSE	17.05	3.55	1	1		102.599	143.883	152.839	133.107	79.2903	84.079	82.315	81.8948	0.615255	0.0300274	34278	Uracil phosphoribosyltransferase homolog OS=Mus musculus OX=10090 GN=Uprt PE=1 SV=1
2067	TRUE	Q8CCJ4|AMER2_MOUSE	1.64	1.79	1	1		163.276	77.6636	175.213	138.718	143.095	96.5001	110.986	116.86	0.842434	0.551566	69933	APC membrane recruitment protein 2 OS=Mus musculus OX=10090 GN=Amer2 PE=1 SV=2
1866	TRUE	O88456|CPNS1_MOUSE	32.02	15.67	4	4		1632.97	1601.98	1556.58	1597.17	755.518	601.775	549.361	635.552	0.397923	0.000126911	28406	Calpain small subunit 1 OS=Mus musculus OX=10090 GN=Capns1 PE=1 SV=2
1297	TRUE	E9Q7G0|NUMA1_MOUSE	24.71	1.53	3	3		250.687	248.573	266.613	255.291	311.144	322.126	347.844	327.038	1.28104	0.00427348	235630	Nuclear mitotic apparatus protein 1 OS=Mus musculus OX=10090 GN=Numa1 PE=1 SV=1
3033	TRUE	P51859|HDGF_MOUSE	2.12	4.22	2	1		135.429	150.291	94.7352	126.819	292.306	125.681	95.4657	171.151	1.34957	0.523018	26269	Hepatoma-derived growth factor OS=Mus musculus OX=10090 GN=Hdgf PE=1 SV=2
1837	TRUE	P12787|COX5A_MOUSE	30.54	21.92	4	4		7609.31	6465.47	8354.82	7476.53	3453.56	3719.57	3785.36	3652.83	0.488572	0.00238539	16101	Cytochrome c oxidase subunit 5A, mitochondrial OS=Mus musculus OX=10090 GN=Cox5a PE=1 SV=2
1402	FALSE	Q64G17|AN32C_MOUSE	18.33	21.95	3	3		2474.1	3380.01	2969.45	2941.19	1832.63	1049.57	1303.23	1395.14	0.474347	0.0114223	14066	Putative acidic leucine-rich nuclear phosphoprotein 32 family member C OS=Mus musculus OX=10090 GN=Anp32c PE=2 SV=3
1574	TRUE	O88444|ADCY1_MOUSE	10.76	2.95	3	3		485.997	489.325	390.442	455.255	387.007	298.818	376.02	353.948	0.777473	0.0764857	123373	Adenylate cyclase type 1 OS=Mus musculus OX=10090 GN=Adcy1 PE=1 SV=2
551	TRUE	P80315|TCPD_MOUSE	17.57	27.09	13	13		6229.05	4538.09	3937.14	4901.43	2665.68	2978.61	2322.29	2655.53	0.541786	0.0343412	58066	T-complex protein 1 subunit delta OS=Mus musculus OX=10090 GN=Cct4 PE=1 SV=3
595	TRUE	Q9CWZ7|SNAG_MOUSE	64.99	50	15	15		21253.2	20972.8	20520.7	20915.5	8179.94	8075.29	7897.78	8051	0.384929	5.98227e-07	34732	Gamma-soluble NSF attachment protein OS=Mus musculus OX=10090 GN=Napg PE=1 SV=1
3507	TRUE	Q8VHN7|AGRV1_MOUSE	40.63	0.13	1	1		5615.8	5926.24	5946.61	5829.55	3020.8	2768.11	3141.61	2976.84	0.510647	4.93547e-05	687458	Adhesion G-protein coupled receptor V1 OS=Mus musculus OX=10090 GN=Adgrv1 PE=1 SV=1
1809	TRUE	Q8R1G2|CMBL_MOUSE	20.67	25.71	6	6		470.25	431.716	600.627	500.864	274.39	320.21	287.961	294.187	0.587358	0.0174193	27902	Carboxymethylenebutenolidase homolog OS=Mus musculus OX=10090 GN=Cmbl PE=1 SV=1
1512	TRUE	Q9Z0P5|TWF2_MOUSE	18.47	10.32	4	2		434.77	548.346	649.11	544.075	328.021	321.86	339.953	329.945	0.606432	0.0261496	39471	Twinfilin-2 OS=Mus musculus OX=10090 GN=Twf2 PE=1 SV=1
516	TRUE	Q3UVL4|VPS51_MOUSE	26.09	18.29	13	13		1769.56	1676.42	1493.25	1646.41	997.47	852.449	1042.64	964.187	0.58563	0.00235921	86187	Vacuolar protein sorting-associated protein 51 homolog OS=Mus musculus OX=10090 GN=Vps51 PE=1 SV=2
2550	TRUE	P63166|SUMO1_MOUSE	8.79	18.81	2	2		168.035	287.127	228.37	227.844	183.754	81.1834	144.599	136.512	0.599146	0.115459	11557	Small ubiquitin-related modifier 1 OS=Mus musculus OX=10090 GN=Sumo1 PE=1 SV=1
2674	TRUE	Q9CR86|CHSP1_MOUSE	46.84	7.43	1	1		43.9483	80.8088	57.5501	60.7691	18.6569	18.6569	18.6569	18.6569	0.307012	0.0173478	16062	Calcium-regulated heat stable protein 1 OS=Mus musculus OX=10090 GN=Carhsp1 PE=1 SV=1
3119	TRUE	Q8C196|CPSM_MOUSE	4.76	0.47	1	1		1268.78	1794.33	890.053	1317.72	1592.89	1618.53	1532.74	1581.39	1.20009	0.373497	164618	Carbamoyl-phosphate synthase [ammonia], mitochondrial OS=Mus musculus OX=10090 GN=Cps1 PE=1 SV=2
811	TRUE	Q8BQZ4|RLGPB_MOUSE	6.37	2.7	5	5		965.615	1087.27	1236.46	1096.45	1010.04	966.745	977.221	984.67	0.898052	0.231947	165200	Ral GTPase-activating protein subunit beta OS=Mus musculus OX=10090 GN=Ralgapb PE=1 SV=2
1354	FALSE	P02089|HBB2_MOUSE	31.78	26.53	4	4		14154.5	14711.1	13216.5	14027.3	10212.3	10081.2	10420.7	10238	0.729864	0.00106306	15878	Hemoglobin subunit beta-2 OS=Mus musculus OX=10090 GN=Hbb-b2 PE=1 SV=2
2475	TRUE	P34022|RANG_MOUSE	47.08	13.3	3	3		2986.06	3328.13	3433.65	3249.28	1124.92	1140.43	1078.35	1114.57	0.34302	9.72657e-05	23596	Ran-specific GTPase-activating protein OS=Mus musculus OX=10090 GN=Ranbp1 PE=1 SV=2
1925	TRUE	Q9D554|SF3A3_MOUSE	18.11	4.99	2	2		292.91	231.671	241.637	255.406	172.348	104.064	113.834	130.082	0.509315	0.0117704	58842	Splicing factor 3A subunit 3 OS=Mus musculus OX=10090 GN=Sf3a3 PE=1 SV=2
1397	TRUE	Q62465|VAT1_MOUSE	25.93	18.72	6	6		1815.74	1875.98	2084.32	1925.35	557.65	690.16	914.173	720.661	0.374302	0.000801661	43097	Synaptic vesicle membrane protein VAT-1 homolog OS=Mus musculus OX=10090 GN=Vat1 PE=1 SV=3
1578	TRUE	Q569Z5|DDX46_MOUSE	3.61	2.03	2	2		312.512	507.135	300.574	373.407	285.146	438.901	155.704	293.25	0.785338	0.490656	117448	Probable ATP-dependent RNA helicase DDX46 OS=Mus musculus OX=10090 GN=Ddx46 PE=1 SV=2
2839	TRUE	Q9WTR6|XCT_MOUSE	3.8	3.98	2	2		225.831	305.477	209.516	246.941	303.988	264.095	254.428	274.17	1.11027	0.459436	55456	Cystine/glutamate transporter OS=Mus musculus OX=10090 GN=Slc7a11 PE=1 SV=1
1373	FALSE	P26011|ITB7_MOUSE	6.6	1.12	1	1		90.828	210.067	155.847	152.247	109.862	78.4415	106.882	98.3951	0.646285	0.207918	87411	Integrin beta-7 OS=Mus musculus OX=10090 GN=Itgb7 PE=1 SV=2
2596	TRUE	Q80XP9|WNK3_MOUSE	23.18	0.46	1	1		10410.4	10579.1	10614.1	10534.6	9580.24	9503.49	9940.27	9674.66	0.918374	0.0044311	193991	Serine/threonine-protein kinase WNK3 OS=Mus musculus OX=10090 GN=Wnk3 PE=1 SV=3
3134	TRUE	Q91Z31|PTBP2_MOUSE	18.48	2.26	1	1		164.12	143.568	106.008	137.899	18.6569	57.0077	43.6891	39.7845	0.288506	0.00857637	57489	Polypyrimidine tract-binding protein 2 OS=Mus musculus OX=10090 GN=Ptbp2 PE=1 SV=2
2989	TRUE	Q9QXT0|CNPY2_MOUSE	20.77	14.29	2	2		1156.11	1159.19	1060.06	1125.12	138.966	359.723	332.483	277.057	0.246246	0.000381102	20767	Protein canopy homolog 2 OS=Mus musculus OX=10090 GN=Cnpy2 PE=1 SV=1
1257	TRUE	Q9Z2W0|DNPEP_MOUSE	37.3	14.8	6	6		2285.84	2283.15	2158.77	2242.59	1401.77	1524.86	1494.81	1473.81	0.657192	0.00016247	52207	Aspartyl aminopeptidase OS=Mus musculus OX=10090 GN=Dnpep PE=1 SV=2
1765	TRUE	Q9R0P3|ESTD_MOUSE	32.1	23.05	6	6		7206	8614.82	7746.74	7855.85	3411.56	3332.26	2663.13	3135.65	0.399148	0.000571383	31320	S-formylglutathione hydrolase OS=Mus musculus OX=10090 GN=Esd PE=1 SV=1
666	TRUE	Q91V41|RAB14_MOUSE	41.98	62.33	11	11	Acetylation (Protein N-term); Oxidation (M)	9657.08	10802.8	9715.73	10058.5	4368.05	4462.07	4008.74	4279.62	0.425471	0.000129923	23897	Ras-related protein Rab-14 OS=Mus musculus OX=10090 GN=Rab14 PE=1 SV=3
2304	TRUE	P35922|FMR1_MOUSE	1.7	1.3	2	1		211.807	251.95	138.417	200.725	185.573	204.542	148.072	179.396	0.89374	0.596619	68989	Fragile X messenger ribonucleoprotein 1 OS=Mus musculus OX=10090 GN=Fmr1 PE=1 SV=1
1180	TRUE	P48036|ANXA5_MOUSE	46.3	14.11	5	5		2322.56	2453.14	2428.66	2401.46	984.844	859.294	917.827	920.655	0.383374	1.05572e-05	35752	Annexin A5 OS=Mus musculus OX=10090 GN=Anxa5 PE=1 SV=1
1060	TRUE	Q91X97|NCALD_MOUSE	34.13	19.69	9	3		5108.79	5376.44	5968.41	5484.55	511.147	924.686	797.34	744.391	0.135725	7.32886e-05	22245	Neurocalcin-delta OS=Mus musculus OX=10090 GN=Ncald PE=1 SV=4
2151	TRUE	Q99LS3|SERB_MOUSE	23.65	11.56	3	3		908.104	1027.43	866.759	934.097	201.466	205.603	391.139	266.069	0.284841	0.0010687	25096	Phosphoserine phosphatase OS=Mus musculus OX=10090 GN=Psph PE=1 SV=1
417	TRUE	P08003|PDIA4_MOUSE	23.96	23.35	13	13		1715.42	2198.27	1885.11	1932.93	590.304	793.59	946.684	776.859	0.401907	0.00272618	71982	Protein disulfide-isomerase A4 OS=Mus musculus OX=10090 GN=Pdia4 PE=1 SV=3
825	TRUE	Q9WV27|AT1A4_MOUSE	7.89	1.45	8	1		2.89985e+06	2946195	3256477	3.03417e+06	2.64242e+06	1.2761e+06	2.47204e+06	2.13018e+06	0.702064	0.111568	114887	Sodium/potassium-transporting ATPase subunit alpha-4 OS=Mus musculus OX=10090 GN=Atp1a4 PE=1 SV=3
2444	TRUE	Q9DBH5|LMAN2_MOUSE	7.85	5.87	2	2		247.433	288.139	354.276	296.616	214.825	97.9578	249.42	187.401	0.631796	0.119972	40430	Vesicular integral-membrane protein VIP36 OS=Mus musculus OX=10090 GN=Lman2 PE=1 SV=2
348	TRUE	Q9ESN9|JIP3_MOUSE	8.98	5.98	9	7		672.158	835.196	706.746	738.033	390.371	581.983	654.973	542.442	0.734983	0.103801	147561	C-Jun-amino-terminal kinase-interacting protein 3 OS=Mus musculus OX=10090 GN=Mapk8ip3 PE=1 SV=1
692	TRUE	O08709|PRDX6_MOUSE	57.08	57.14	12	12		28256.3	27451.7	26563	27423.6	12774.9	12580.6	12722.7	12692.7	0.462839	7.43776e-06	24871	Peroxiredoxin-6 OS=Mus musculus OX=10090 GN=Prdx6 PE=1 SV=3
2141	TRUE	Q9QX11|CYH1_MOUSE	16.15	6.53	3	3		450.377	608.64	586.968	548.662	387.295	388.427	391.347	389.023	0.70904	0.0322335	46274	Cytohesin-1 OS=Mus musculus OX=10090 GN=Cyth1 PE=1 SV=2
1365	TRUE	P29387|GBB4_MOUSE	12.86	10.29	8	4		1171.88	1239.92	1238.51	1216.77	1135.25	1065.38	954.67	1051.77	0.864395	0.0447226	37379	Guanine nucleotide-binding protein subunit beta-4 OS=Mus musculus OX=10090 GN=Gnb4 PE=1 SV=4
1099	TRUE	Q9DCW4|ETFB_MOUSE	48.65	30.98	7	7		3468.14	3623.01	3563.53	3551.56	1817.66	1704.89	1674.42	1732.32	0.487764	8.40476e-06	27623	Electron transfer flavoprotein subunit beta OS=Mus musculus OX=10090 GN=Etfb PE=1 SV=3
182	TRUE	P26443|DHE3_MOUSE	45.58	39.96	23	23	Oxidation (M)	45581	45882.2	43918.9	45127.4	22411.6	23355.3	21071.5	22279.5	0.493702	1.4357e-05	61337	Glutamate dehydrogenase 1, mitochondrial OS=Mus musculus OX=10090 GN=Glud1 PE=1 SV=1
1907	TRUE	O70493|SNX12_MOUSE	17.57	29.7	5	5		1525.3	2282.78	1923.61	1910.56	830.078	1130.69	1139.71	1033.49	0.540935	0.0220554	19116	Sorting nexin-12 OS=Mus musculus OX=10090 GN=Snx12 PE=1 SV=1
1206	TRUE	Q64478|H2B1H_MOUSE	38.61	5.56	6	1		805.324	779.561	752.187	779.024	405.198	427.735	370.338	401.091	0.514863	7.59052e-05	13920	Histone H2B type 1-H OS=Mus musculus OX=10090 GN=H2bc9 PE=1 SV=3
705	FALSE	P63143|KCAB1_MOUSE	1.32	8.73	4	4		6041.53	1730.97	5203.94	4325.48	4178.97	4758.32	4195.28	4377.52	1.01203	0.970732	44723	Voltage-gated potassium channel subunit beta-1 OS=Mus musculus OX=10090 GN=Kcnab1 PE=1 SV=2
2595	TRUE	Q80TA9|EPG5_MOUSE	0.08	0.47	1	1		115.867	152.735	216.767	161.79	93.2761	184.605	217.66	165.181	1.02096	0.946474	290801	Ectopic P granules protein 5 homolog OS=Mus musculus OX=10090 GN=Epg5 PE=1 SV=2
2282	TRUE	O70439|STX7_MOUSE	11.02	22.22	4	4	Acetylation (Protein N-term)	745.72	863.42	510.877	706.673	1015.98	1134.04	924.703	1024.91	1.45033	0.0569209	29821	Syntaxin-7 OS=Mus musculus OX=10090 GN=Stx7 PE=1 SV=3
383	TRUE	P50518|VATE1_MOUSE	27.73	45.58	12	12	Acetylation (Protein N-term); Oxidation (M)	21010	15602.9	20492.8	19035.2	9352.43	8422.15	8967.09	8913.89	0.468284	0.00438177	26157	V-type proton ATPase subunit E 1 OS=Mus musculus OX=10090 GN=Atp6v1e1 PE=1 SV=2
700	TRUE	Q9DBF1|AL7A1_MOUSE	40.29	23.38	11	11		4051.49	4406.4	4037.93	4165.27	1480.24	1673.65	1762.58	1638.82	0.393449	6.6556e-05	58861	Alpha-aminoadipic semialdehyde dehydrogenase OS=Mus musculus OX=10090 GN=Aldh7a1 PE=1 SV=4
36	TRUE	Q6ZPE2|MTMR5_MOUSE	16.55	23.57	42	39		4698.62	4378.61	5024.63	4700.62	3957.32	3829.53	4142.42	3976.42	0.845935	0.0250949	208693	Myotubularin-related protein 5 OS=Mus musculus OX=10090 GN=Sbf1 PE=1 SV=2
422	TRUE	Q8VED5|K2C79_MOUSE	50.92	7.91	17	5	Oxidation (M)	3509.45	3499.33	3148.18	3385.65	198.277	142.338	161.735	167.45	0.0494587	1.14536e-05	57552	Keratin, type II cytoskeletal 79 OS=Mus musculus OX=10090 GN=Krt79 PE=1 SV=2
3775	TRUE	Q9CQ85|TIM22_MOUSE	10.48	7.73	1	1		244.761	281.301	328.381	284.815	241.481	229.46	228.349	233.097	0.818415	0.103032	20114	Mitochondrial import inner membrane translocase subunit Tim22 OS=Mus musculus OX=10090 GN=Timm22 PE=1 SV=1
1396	TRUE	Q7TPM6|FSD1_MOUSE	16.98	15.12	7	7		742.294	1022.98	1019.16	928.145	629.006	591.777	498.214	572.999	0.61736	0.0243376	55525	Fibronectin type III and SPRY domain-containing protein 1 OS=Mus musculus OX=10090 GN=Fsd1 PE=1 SV=1
1388	TRUE	O88322|NID2_MOUSE	2.17	2.42	4	3		848.522	707.721	506.462	687.568	614.514	605.4	634.16	618.025	0.898855	0.52357	153913	Nidogen-2 OS=Mus musculus OX=10090 GN=Nid2 PE=1 SV=2
1691	TRUE	Q8R3S6|EXOC1_MOUSE	13.73	5.82	5	5		786.333	761.784	878.452	808.856	551.277	704.12	647.456	634.284	0.784174	0.0375989	101889	Exocyst complex component 1 OS=Mus musculus OX=10090 GN=Exoc1 PE=1 SV=4
2422	TRUE	Q8BP48|MAP11_MOUSE	3.13	9.07	3	3		734.606	416.744	631.715	594.355	454.779	500.934	561.241	505.651	0.850757	0.419108	43221	Methionine aminopeptidase 1 OS=Mus musculus OX=10090 GN=Metap1 PE=1 SV=1
2055	TRUE	Q9CR00|PSMD9_MOUSE	33.39	22.07	5	5	Acetylation (Protein N-term)	1303.1	1395.45	1464.46	1387.67	507.176	505.733	645.783	552.898	0.398436	0.000223568	24720	26S proteasome non-ATPase regulatory subunit 9 OS=Mus musculus OX=10090 GN=Psmd9 PE=1 SV=1
74	TRUE	Q0KL02|TRIO_MOUSE	2.13	4.87	20	12		996.253	8580.39	784.399	3453.68	6978.42	6991.86	780.357	4916.88	1.42366	0.679895	347861	Triple functional domain protein OS=Mus musculus OX=10090 GN=Trio PE=1 SV=3
2132	TRUE	Q60692|PSB6_MOUSE	43.14	16.81	4	4		7555.14	7845.18	7828.66	7742.99	3159.95	3432.14	2923.18	3171.76	0.409629	1.26309e-05	25379	Proteasome subunit beta type-6 OS=Mus musculus OX=10090 GN=Psmb6 PE=1 SV=3
806	TRUE	P26638|SYSC_MOUSE	28.26	20.31	9	9		9384.78	7203.14	7083.36	7890.43	2834.16	3610.27	3236.59	3227	0.408977	0.0039486	58389	Serine--tRNA ligase, cytoplasmic OS=Mus musculus OX=10090 GN=Sars1 PE=1 SV=3
267	TRUE	P48962|ADT1_MOUSE	52.35	21.14	15	7	Acetylation (Protein N-term)	116011	122839	119137	119329	67016.4	67223.4	68491.6	67577.1	0.566309	1.39693e-05	32904	ADP/ATP translocase 1 OS=Mus musculus OX=10090 GN=Slc25a4 PE=1 SV=4
1457	TRUE	Q9D1T0|LIGO1_MOUSE	15.48	12.7	6	6		3684.08	3012.48	3942.58	3546.38	2328.68	1059.83	1560.08	1649.53	0.46513	0.0147315	69101	Leucine-rich repeat and immunoglobulin-like domain-containing nogo receptor-interacting protein 1 OS=Mus musculus OX=10090 GN=Lingo1 PE=1 SV=1
1825	TRUE	Q9JK81|MYG1_MOUSE	18.26	8.95	3	3		426.95	347.742	516.173	430.288	245.891	281.287	233.743	253.64	0.589466	0.0252521	42723	MYG1 exonuclease OS=Mus musculus OX=10090 GN=Myg1 PE=1 SV=1
539	TRUE	Q9D8E6|RL4_MOUSE	35.78	32.46	14	14	acrylamide	8863.74	9080.65	8161.72	8702.03	5602.05	5614.75	5290.98	5502.59	0.632334	0.000420178	47154	60S ribosomal protein L4 OS=Mus musculus OX=10090 GN=Rpl4 PE=1 SV=3
281	TRUE	Q922S4|PDE2A_MOUSE	9.39	22.58	21	21		4542.72	4905.94	3356.12	4268.26	3062.68	3356.31	3487.39	3302.13	0.773647	0.116916	105619	cGMP-dependent 3',5'-cyclic phosphodiesterase OS=Mus musculus OX=10090 GN=Pde2a PE=1 SV=4
603	TRUE	Q91Z67|SRGP2_MOUSE	4.1	5.7	7	6		2475.91	2619.29	1801.62	2298.94	1422.55	2176.94	2206.51	1935.33	0.841838	0.369213	120798	SLIT-ROBO Rho GTPase-activating protein 2 OS=Mus musculus OX=10090 GN=Srgap2 PE=1 SV=2
2934	TRUE	O35855|BCAT2_MOUSE	36.95	5.85	2	2		200.902	233.531	203.456	212.63	103.895	104.913	111.369	106.726	0.501932	0.000592218	44127	Branched-chain-amino-acid aminotransferase, mitochondrial OS=Mus musculus OX=10090 GN=Bcat2 PE=1 SV=2
487	TRUE	P48774|GSTM5_MOUSE	60	30.36	10	8	Oxidation (M)	22886.9	23275.5	23608	23256.8	11629.2	11789.5	11359.5	11592.7	0.498466	1.13091e-06	26635	Glutathione S-transferase Mu 5 OS=Mus musculus OX=10090 GN=Gstm5 PE=1 SV=1
1986	TRUE	P47934|CACP_MOUSE	2.63	4.95	3	3		591.892	342.405	416.019	450.105	243.701	484.876	422.848	383.808	0.852708	0.556551	70840	Carnitine O-acetyltransferase OS=Mus musculus OX=10090 GN=Crat PE=1 SV=3
1243	TRUE	A2RT62|FXL16_MOUSE	27.37	19.83	8	8		3970.87	4342.58	4220.01	4177.82	2435.3	2429.79	1912.03	2259.04	0.540722	0.000726971	51878	F-box/LRR-repeat protein 16 OS=Mus musculus OX=10090 GN=Fbxl16 PE=1 SV=1
3922	TRUE	P42703|LIFR_MOUSE	15.8	1.56	1	1		493.258	658.375	608.638	586.757	295.558	148.091	316.733	253.46	0.431969	0.00988172	122574	Leukemia inhibitory factor receptor OS=Mus musculus OX=10090 GN=Lifr PE=1 SV=1
407	FALSE	Q3V0K9|PLSI_MOUSE	23.52	4.13	3	2		316.736	224.924	286.4	276.02	126.036	143.938	104.977	124.984	0.452806	0.00668937	70408	Plastin-1 OS=Mus musculus OX=10090 GN=Pls1 PE=1 SV=1
726	TRUE	Q9D415|DLGP1_MOUSE	13.22	10.99	12	10		2625.75	1437.8	1293.38	1785.64	890.134	988.507	796.648	891.763	0.499408	0.103698	110374	Disks large-associated protein 1 OS=Mus musculus OX=10090 GN=Dlgap1 PE=1 SV=3
629	TRUE	Q9R1P4|PSA1_MOUSE	47.92	46.39	11	11		12712.1	11913.2	13313.1	12646.1	5005.2	4968.5	5264.6	5079.43	0.40166	5.37482e-05	29547	Proteasome subunit alpha type-1 OS=Mus musculus OX=10090 GN=Psma1 PE=1 SV=1
2179	TRUE	P97952|SCN1B_MOUSE	1.3	3.67	1	1		470.878	85.6215	292.145	282.881	167.494	178.706	227.631	191.277	0.676174	0.462416	24650	Sodium channel subunit beta-1 OS=Mus musculus OX=10090 GN=Scn1b PE=1 SV=1
3084	TRUE	Q9ERV1|MKRN2_MOUSE	17.13	2.88	1	1		232.516	230.825	165.913	209.751	140.919	128.216	134.181	134.439	0.640943	0.0275818	46597	E3 ubiquitin-protein ligase makorin-2 OS=Mus musculus OX=10090 GN=Mkrn2 PE=1 SV=2
1893	TRUE	Q8R555|CRAC1_MOUSE	14.49	4.49	3	3		551.07	701.501	871.563	708.045	254.781	473.056	349.273	359.036	0.507082	0.035747	70325	Cartilage acidic protein 1 OS=Mus musculus OX=10090 GN=Crtac1 PE=2 SV=1
1489	TRUE	Q6PHU5|SORT_MOUSE	2.89	8.24	5	5		1368	851.368	1057.75	1092.37	1010.53	793.131	1076.89	960.185	0.878992	0.487107	91200	Sortilin OS=Mus musculus OX=10090 GN=Sort1 PE=1 SV=1
1044	TRUE	Q9CQF9|PCYOX_MOUSE	35.19	10.69	5	5		1366.04	1386.73	1536.57	1429.78	630.469	526.178	494.275	550.307	0.38489	0.000202149	56495	Prenylcysteine oxidase 1 OS=Mus musculus OX=10090 GN=Pcyox1 PE=1 SV=1
805	TRUE	Q9Z1N5|DX39B_MOUSE	44.77	27.8	11	11		7624.99	7758.42	7864.84	7749.42	3452.18	3796.47	3356.55	3535.07	0.456172	9.68376e-06	49035	Spliceosome RNA helicase Ddx39b OS=Mus musculus OX=10090 GN=Ddx39b PE=1 SV=1
3295	TRUE	Q8BFT9|SVOP_MOUSE	1.52	1.82	1	1		178.961	133.197	163.31	158.49	122.562	134.619	193.207	150.129	0.94725	0.760538	60769	Synaptic vesicle 2-related protein OS=Mus musculus OX=10090 GN=Svop PE=1 SV=1
579	TRUE	P28271|ACOHC_MOUSE	16.5	13.84	13	13		1699.85	1518.67	1507.72	1575.41	1179.45	1095.75	811.443	1028.88	0.653088	0.0128199	98126	Cytoplasmic aconitate hydratase OS=Mus musculus OX=10090 GN=Aco1 PE=1 SV=3
2457	TRUE	B2RUJ5|APBA1_MOUSE	0.6	1.54	2	1		120.506	68.8278	175.437	121.59	126.554	116.332	113.814	118.9	0.977875	0.935071	92909	Amyloid-beta A4 precursor protein-binding family A member 1 OS=Mus musculus OX=10090 GN=Apba1 PE=1 SV=2
2338	TRUE	Q99JY8|PLPP3_MOUSE	34.5	11.22	3	3		2195.46	2391.74	2253.13	2280.11	1589.34	1654.73	1667.41	1637.16	0.718019	0.000521626	35216	Phospholipid phosphatase 3 OS=Mus musculus OX=10090 GN=Plpp3 PE=1 SV=1
2454	TRUE	Q9CPV9|P2Y12_MOUSE	8.88	4.9	2	2		211.902	657.075	1268.25	712.41	1356.52	1770.83	1507.5	1544.95	2.16862	0.0647656	39474	P2Y purinoceptor 12 OS=Mus musculus OX=10090 GN=P2ry12 PE=1 SV=1
285	TRUE	Q8BL66|EEA1_MOUSE	31.63	12.05	15	15		1894.6	1644.42	1674.1	1737.71	940.762	947.166	803.723	897.217	0.516323	0.000788019	160915	Early endosome antigen 1 OS=Mus musculus OX=10090 GN=Eea1 PE=1 SV=2
1525	TRUE	Q80TL0|PPM1E_MOUSE	37.71	7.08	6	6		3376.08	3370.62	3003.75	3250.15	1654.54	1498.62	1451.84	1535	0.472285	0.000238274	83419	Protein phosphatase 1E OS=Mus musculus OX=10090 GN=Ppm1e PE=1 SV=2
3090	TRUE	Q9WV32|ARC1B_MOUSE	4.03	5.65	2	2		95.3727	78.9735	65.9739	80.1067	70.0662	108.843	109.702	96.204	1.20095	0.360294	41064	Actin-related protein 2/3 complex subunit 1B OS=Mus musculus OX=10090 GN=Arpc1b PE=1 SV=4
1347	TRUE	Q8VHQ9|ACO11_MOUSE	24.87	7.74	5	5	Acetylation (Protein N-term)	1352.1	1402.17	1314.64	1356.3	718.627	827.758	580.774	709.053	0.522784	0.00103361	67355	Acyl-coenzyme A thioesterase 11 OS=Mus musculus OX=10090 GN=Acot11 PE=1 SV=1
397	TRUE	Q8CHH9|SEPT8_MOUSE	23.78	23.31	14	11		13379.8	14726.4	14336.5	14147.6	19453.3	22580.2	18975.9	20336.5	1.43745	0.00668967	49812	Septin-8 OS=Mus musculus OX=10090 GN=Septin8 PE=1 SV=4
2670	TRUE	Q8C163|EXOG_MOUSE	20.42	3.53	1	1		431.663	263.203	524.826	406.564	68.5237	117.083	129.601	105.069	0.258433	0.0186752	41384	Nuclease EXOG, mitochondrial OS=Mus musculus OX=10090 GN=Exog PE=1 SV=1
2126	TRUE	P16332|MUTA_MOUSE	3.27	3.34	2	2		164.759	180.372	151.504	165.545	7206.37	94.9268	168.784	2490.03	15.0414	0.380098	82844	Methylmalonyl-CoA mutase, mitochondrial OS=Mus musculus OX=10090 GN=Mmut PE=1 SV=2
2368	TRUE	Q91X58|ZFN2B_MOUSE	26.33	12.84	3	3		1849.76	1886.38	1587.38	1774.5	478.364	629.558	783.285	630.402	0.355255	0.000889963	27895	AN1-type zinc finger protein 2B OS=Mus musculus OX=10090 GN=Zfand2b PE=1 SV=1
2013	TRUE	Q9DBG6|RPN2_MOUSE	34.18	3.96	2	2		342.318	463.961	469.301	425.193	102.468	116.225	124.659	114.451	0.269173	0.00177486	69063	Dolichyl-diphosphooligosaccharide--protein glycosyltransferase subunit 2 OS=Mus musculus OX=10090 GN=Rpn2 PE=1 SV=1
1835	TRUE	P62855|RS26_MOUSE	38.63	40	4	4		7749.49	8053.35	7820.27	7874.37	4375.68	4322.28	3826.58	4174.85	0.530182	4.77744e-05	13015	40S ribosomal protein S26 OS=Mus musculus OX=10090 GN=Rps26 PE=1 SV=3
2696	TRUE	Q69Z99|ZN512_MOUSE	11.83	2.85	1	1		74.0882	125.495	119.348	106.31	18.6569	18.6569	51.199	29.5043	0.277529	0.0169869	63908	Zinc finger protein 512 OS=Mus musculus OX=10090 GN=Znf512 PE=2 SV=2
1889	TRUE	Q9Z0Y1|DCTN3_MOUSE	18.42	19.89	4	4		1017.22	933.27	871.406	940.633	472.222	259.4	490.682	407.435	0.433149	0.00335347	20978	Dynactin subunit 3 OS=Mus musculus OX=10090 GN=Dctn3 PE=1 SV=2
620	TRUE	Q8R0S4|CACB4_MOUSE	14.04	19.08	11	7		1915.12	1939.37	1030.2	1628.23	665.583	887.86	835.642	796.362	0.489096	0.0533276	57950	Voltage-dependent L-type calcium channel subunit beta-4 OS=Mus musculus OX=10090 GN=Cacnb4 PE=1 SV=2
1032	TRUE	Q8C0M9|ASGL1_MOUSE	43.65	26.69	8	8	Oxidation (M)	9194.33	9037.42	9359.15	9196.97	4409.31	3846.52	3973.22	4076.35	0.443228	1.2273e-05	33950	Isoaspartyl peptidase/L-asparaginase OS=Mus musculus OX=10090 GN=Asrgl1 PE=1 SV=1
2700	TRUE	Q9CZX9|EMC4_MOUSE	11.78	12.57	2	2	Acetylation (Protein N-term)	292.538	345.37	280.824	306.244	258.522	218.634	262.546	246.567	0.805133	0.0700148	20117	ER membrane protein complex subunit 4 OS=Mus musculus OX=10090 GN=Emc4 PE=1 SV=1
3089	TRUE	Q924X2|CPT1B_MOUSE	36.79	1.68	1	1		10321.7	9994.09	10607.9	10307.9	7732.28	7423.28	7271.8	7475.78	0.725248	0.000222105	88217	Carnitine O-palmitoyltransferase 1, muscle isoform OS=Mus musculus OX=10090 GN=Cpt1b PE=1 SV=1
155	TRUE	Q61301|CTNA2_MOUSE	23.42	21.41	24	19		4424.19	5158.58	5198.58	4927.12	2131.07	2905.35	2809.81	2615.41	0.530819	0.00273447	105286	Catenin alpha-2 OS=Mus musculus OX=10090 GN=Ctnna2 PE=1 SV=3
3890	TRUE	P0DP60|LYNX1_MOUSE	13.88	6.03	1	1		2043.21	4491.44	3996.74	3510.46	212.167	716.039	1293.16	740.454	0.210928	0.026788	12835	Ly-6/neurotoxin-like protein 1 OS=Mus musculus OX=10090 GN=Lynx1 PE=1 SV=1
476	TRUE	Q69Z98|BRSK2_MOUSE	23.75	15.51	11	9		4655.06	4520.67	4334.47	4503.4	3335.3	3742.88	3616.97	3565.05	0.791635	0.00351166	81733	Serine/threonine-protein kinase BRSK2 OS=Mus musculus OX=10090 GN=Brsk2 PE=1 SV=2
1451	TRUE	Q9EP89|LACTB_MOUSE	39.93	13.07	7	7		1822.59	1671.5	1798.41	1764.17	561.507	557.633	447.967	522.369	0.2961	3.18527e-05	60705	Serine beta-lactamase-like protein LACTB, mitochondrial OS=Mus musculus OX=10090 GN=Lactb PE=1 SV=1
2359	TRUE	P61967|AP1S1_MOUSE	26.44	16.46	3	2		605.11	549.769	710.22	621.7	200.958	169.736	270.965	213.887	0.344035	0.00185999	18733	AP-1 complex subunit sigma-1A OS=Mus musculus OX=10090 GN=Ap1s1 PE=1 SV=1
1862	TRUE	O35215|DOPD_MOUSE	35.49	45.76	5	5		6164.79	6174.3	5892.89	6077.33	1438.1	1786.62	2053.4	1759.37	0.289498	2.7559e-05	13077	D-dopachrome decarboxylase OS=Mus musculus OX=10090 GN=Ddt PE=1 SV=3
1594	TRUE	Q8BJY1|PSMD5_MOUSE	17.19	8.73	4	4		670.662	955.454	842.631	822.916	577.695	445.416	481.856	501.656	0.609608	0.0248356	55972	26S proteasome non-ATPase regulatory subunit 5 OS=Mus musculus OX=10090 GN=Psmd5 PE=1 SV=4
1361	TRUE	Q03157|APLP1_MOUSE	24.13	7.03	4	4		1163.66	1425.93	1551.29	1380.29	438.147	356.691	618.967	471.269	0.341426	0.00275178	72848	Amyloid beta precursor like protein 1 OS=Mus musculus OX=10090 GN=Aplp1 PE=1 SV=2
3023	TRUE	Q9WUL7|ARL3_MOUSE	25.67	6.04	1	1		776.952	561.353	750.815	696.373	238.835	154.22	126.405	173.153	0.24865	0.0023191	20487	ADP-ribosylation factor-like protein 3 OS=Mus musculus OX=10090 GN=Arl3 PE=1 SV=1
1920	TRUE	Q9CQI3|GMFB_MOUSE	16.85	26.06	4	4		21572.3	29634.1	20364.7	23857.1	15480.7	15105.6	15153.7	15246.7	0.639084	0.0416786	16723	Glia maturation factor beta OS=Mus musculus OX=10090 GN=Gmfb PE=1 SV=3
3465	TRUE	Q3TKT4|SMCA4_MOUSE	6.55	0.81	1	1		111.963	157.338	105.551	124.951	153.473	161.186	135.156	149.939	1.19998	0.238141	181427	Transcription activator BRG1 OS=Mus musculus OX=10090 GN=Smarca4 PE=1 SV=1
3083	TRUE	O70591|PFD2_MOUSE	23.37	14.94	2	2		547.688	715.404	504.408	589.167	277.722	320.864	311.447	303.344	0.51487	0.0121294	16534	Prefoldin subunit 2 OS=Mus musculus OX=10090 GN=Pfdn2 PE=1 SV=2
808	TRUE	P18760|COF1_MOUSE	68.22	48.8	11	9	Acetylation (Protein N-term)	67605.4	68709.5	69074.2	68463	29739.8	29465.9	30300.9	29835.5	0.43579	1.75548e-07	18560	Cofilin-1 OS=Mus musculus OX=10090 GN=Cfl1 PE=1 SV=3
1051	TRUE	P46935|NEDD4_MOUSE	2.93	1.24	4	1		230.233	178.819	108.803	172.618	131.882	163.138	124.998	140.006	0.811073	0.428969	102706	E3 ubiquitin-protein ligase NEDD4 OS=Mus musculus OX=10090 GN=Nedd4 PE=1 SV=3
184	TRUE	P70704|AT8A1_MOUSE	11.56	23.63	25	24		4645.57	4099.33	4573.72	4439.54	3737.35	3130.64	4014.26	3627.42	0.81707	0.0599534	131413	Phospholipid-transporting ATPase IA OS=Mus musculus OX=10090 GN=Atp8a1 PE=1 SV=2
1951	TRUE	P63044|VAMP2_MOUSE	26.08	13.79	3	1	Oxidation (M)	2917.61	2929.35	2851.74	2899.57	371.123	492.296	861.971	575.13	0.19835	0.00010013	12691	Vesicle-associated membrane protein 2 OS=Mus musculus OX=10090 GN=Vamp2 PE=1 SV=2
532	TRUE	Q9QXY6|EHD3_MOUSE	23.27	13.46	12	6		19712.8	18606	15554.2	17957.7	11693.4	11844.3	12069.6	11869.1	0.660949	0.00817479	60821	EH domain-containing protein 3 OS=Mus musculus OX=10090 GN=Ehd3 PE=1 SV=2
1078	TRUE	Q8C3Q5|SHSA7_MOUSE	27.52	11.29	5	5		667.79	726.336	819.604	737.91	409.761	465.813	410.294	428.623	0.58086	0.00297535	58334	Protein shisa-7 OS=Mus musculus OX=10090 GN=Shisa7 PE=1 SV=3
2543	TRUE	Q99JP0|M4K3_MOUSE	14.58	1.23	1	1		156.595	97.0565	162.317	138.656	85.7614	60.9088	44.9348	63.8684	0.460624	0.0357009	101119	Mitogen-activated protein kinase kinase kinase kinase 3 OS=Mus musculus OX=10090 GN=Map4k3 PE=1 SV=4
770	FALSE	P21995|EMB_MOUSE	23.14	2.12	1	1		711.277	730.71	575.566	672.517	313.995	410.487	369.629	364.704	0.542296	0.00542396	37064	Embigin OS=Mus musculus OX=10090 GN=Emb PE=1 SV=2
2281	TRUE	Q8BH24|TM9S4_MOUSE	4.49	5.29	4	4		1070.52	954.95	649.746	891.738	1029.58	580.568	455.173	688.442	0.772022	0.397601	74693	Transmembrane 9 superfamily member 4 OS=Mus musculus OX=10090 GN=Tm9sf4 PE=1 SV=1
1989	TRUE	P57722|PCBP3_MOUSE	6.82	3.5	4	1		203.931	277.561	313.582	265.025	196.078	200.388	44.2488	146.905	0.554307	0.123262	39294	Poly(rC)-binding protein 3 OS=Mus musculus OX=10090 GN=Pcbp3 PE=1 SV=3
3895	TRUE	P47964|RL36_MOUSE	17.86	8.57	1	1		1160.86	1245.32	1068.32	1158.17	519.895	753.19	394.227	555.771	0.479872	0.00673584	12216	60S ribosomal protein L36 OS=Mus musculus OX=10090 GN=Rpl36 PE=1 SV=2
1946	TRUE	O55142|RL35A_MOUSE	34.36	23.64	3	3		1723.05	1856.79	1638.66	1739.5	848.547	902.755	748.309	833.204	0.47899	0.000313074	12554	60S ribosomal protein L35a OS=Mus musculus OX=10090 GN=Rpl35a PE=1 SV=2
1190	TRUE	Q6PDM2|SRSF1_MOUSE	2.94	33.87	9	9		5258.59	2639.9	3664.8	3854.43	4244.84	2412.02	2815.53	3157.46	0.819177	0.500954	27745	Serine/arginine-rich splicing factor 1 OS=Mus musculus OX=10090 GN=Srsf1 PE=1 SV=3
2525	TRUE	Q8CAK3|SHFL_MOUSE	6.3	7.59	2	2		673.761	763.639	844.698	760.699	687.919	724.683	632.63	681.744	0.896207	0.232406	33015	Shiftless antiviral inhibitor of ribosomal frameshifting protein homolog OS=Mus musculus OX=10090 GN=Shfl PE=2 SV=1
1844	TRUE	Q9Z2A5|ATE1_MOUSE	10.67	2.13	1	1		245.898	239.413	245.985	243.765	86.3914	217.932	122.149	142.158	0.583174	0.0610974	59146	Arginyl-tRNA--protein transferase 1 OS=Mus musculus OX=10090 GN=Ate1 PE=1 SV=2
3065	TRUE	Q8BRJ3|RELL2_MOUSE	1.8	2.64	1	1		51.7798	134.096	177.715	121.197	99.939	132.23	164.905	132.358	1.09209	0.800863	32326	RELT-like protein 2 OS=Mus musculus OX=10090 GN=Rell2 PE=1 SV=1
554	TRUE	P15105|GLNA_MOUSE	40.45	27.88	11	11	Acetylation (Protein N-term); Oxidation (M)	159220	170910	173876	168002	83898.4	91727	91470.2	89031.9	0.529945	0.000106183	42120	Glutamine synthetase OS=Mus musculus OX=10090 GN=Glul PE=1 SV=6
2149	TRUE	Q8R010|AIMP2_MOUSE	14.43	3.75	1	1		207.35	267.483	308.96	261.264	159.06	178.461	186.741	174.754	0.668878	0.0475536	35378	Aminoacyl tRNA synthase complex-interacting multifunctional protein 2 OS=Mus musculus OX=10090 GN=Aimp2 PE=1 SV=2
979	TRUE	Q9R1V7|ADA23_MOUSE	81.32	10.13	8	8		9736.18	9773.07	9635.85	9715.03	3216.19	3270.13	3231.54	3239.29	0.333431	1.28171e-08	91548	Disintegrin and metalloproteinase domain-containing protein 23 OS=Mus musculus OX=10090 GN=Adam23 PE=1 SV=1
2840	TRUE	Q8BJD1|ITIH5_MOUSE	1.38	2.1	2	2		195.368	175.975	208.09	193.144	222.604	239.9	156.697	206.4	1.06863	0.649324	106749	Inter-alpha-trypsin inhibitor heavy chain H5 OS=Mus musculus OX=10090 GN=Itih5 PE=1 SV=1
23	TRUE	P20357|MTAP2_MOUSE	21.51	31.62	50	50	Oxidation (M)	18464.1	16489	16137.3	17030.2	10353	12623.3	12177	11717.7	0.688058	0.00610793	199132	Microtubule-associated protein 2 OS=Mus musculus OX=10090 GN=Map2 PE=1 SV=2
2990	TRUE	Q9D880|TIM50_MOUSE	4.05	3.12	1	1		175.408	386.257	508.979	356.881	178.129	361.826	168.382	236.112	0.661599	0.356469	39776	Mitochondrial import inner membrane translocase subunit TIM50 OS=Mus musculus OX=10090 GN=Timm50 PE=1 SV=1
67	FALSE	Q640N3|RHG30_MOUSE	1.59	0.64	2	1		234.05	133.56	265.721	211.11	125.957	250.41	182.288	186.218	0.88209	0.666974	120114	Rho GTPase-activating protein 30 OS=Mus musculus OX=10090 GN=Arhgap30 PE=1 SV=3
69	TRUE	Q01853|TERA_MOUSE	43.78	39.95	30	30	Acetylation (Protein N-term); Oxidation (M)	23267.8	22228	21929.2	22475	14676.6	14645.4	14057.3	14459.8	0.643372	5.98908e-05	89322	Transitional endoplasmic reticulum ATPase OS=Mus musculus OX=10090 GN=Vcp PE=1 SV=4
59	TRUE	P57780|ACTN4_MOUSE	48.83	30.26	38	25		5145.95	5073.34	5118.64	5112.65	1958.26	2206.53	2071.69	2078.82	0.406604	2.21033e-06	104977	Alpha-actinin-4 OS=Mus musculus OX=10090 GN=Actn4 PE=1 SV=1
782	TRUE	G3X9K3|BIG1_MOUSE	34.15	0.65	5	1		18.6569	62.8725	35.2147	38.9147	18.6569	18.6569	18.6569	18.6569	0.47943	0.191344	208500	Brefeldin A-inhibited guanine nucleotide-exchange protein 1 OS=Mus musculus OX=10090 GN=Arfgef1 PE=1 SV=1
3108	TRUE	Q4VA53|PDS5B_MOUSE	6.03	0.9	1	1		41.8596	55.6828	18.6569	38.7331	59.7861	18.6569	18.6569	32.3666	0.835632	0.73376	164419	Sister chromatid cohesion protein PDS5 homolog B OS=Mus musculus OX=10090 GN=Pds5b PE=1 SV=1
1826	TRUE	Q5NCF2|TPPC1_MOUSE	10.77	22.07	3	3		925.857	969.55	969.791	955.066	381.964	689.803	756.182	609.316	0.637983	0.0409229	16882	Trafficking protein particle complex subunit 1 OS=Mus musculus OX=10090 GN=Trappc1 PE=1 SV=1
1282	TRUE	Q8BFZ9|ERLN2_MOUSE	22.05	16.76	5	5		1199.01	1186.06	1255.58	1213.55	860.434	646.914	621.235	709.528	0.584671	0.00306238	37873	Erlin-2 OS=Mus musculus OX=10090 GN=Erlin2 PE=1 SV=1
1504	TRUE	Q8BHL3|TB10B_MOUSE	9.57	6.14	4	4		699.724	579.645	486.382	588.584	506.509	244.998	375.07	375.526	0.638016	0.0942629	87275	TBC1 domain family member 10B OS=Mus musculus OX=10090 GN=Tbc1d10b PE=1 SV=2
2992	TRUE	Q69ZF3|GBA2_MOUSE	16.26	1.31	1	1		187.296	213.155	302.113	234.188	67.3759	104.558	130.573	100.836	0.430576	0.0274761	103294	Non-lysosomal glucosylceramidase OS=Mus musculus OX=10090 GN=Gba2 PE=1 SV=2
145	TRUE	P27773|PDIA3_MOUSE	55.24	57.62	31	31	Oxidation (M)	30981.3	30369.4	30469.1	30606.6	14991	14476.5	14042	14503.2	0.473858	1.09926e-06	56678	Protein disulfide-isomerase A3 OS=Mus musculus OX=10090 GN=Pdia3 PE=1 SV=2
1138	TRUE	P32037|GTR3_MOUSE	15.78	17.04	8	8	Oxidation (M)	4937.98	4633.93	4730.85	4767.59	3571.86	4205.17	4112.79	3963.27	0.831295	0.020692	53479	Solute carrier family 2, facilitated glucose transporter member 3 OS=Mus musculus OX=10090 GN=Slc2a3 PE=1 SV=1
1375	TRUE	Q6PAK3|ANM8_MOUSE	8.28	16.24	7	5		1500.44	954.333	1279.2	1244.66	1079.47	894.887	834.955	936.436	0.752362	0.15268	45276	Protein arginine N-methyltransferase 8 OS=Mus musculus OX=10090 GN=Prmt8 PE=1 SV=2
2459	TRUE	Q91X96|MSS4_MOUSE	2.54	16.26	2	2		934.262	496.519	786.47	739.084	758.397	690.957	419.679	623.011	0.84295	0.520694	13915	Guanine nucleotide exchange factor MSS4 OS=Mus musculus OX=10090 GN=Rabif PE=1 SV=1
964	FALSE	P00520|ABL1_MOUSE	0.21	1.25	1	1		141.759	143.509	113.601	132.956	139.505	152.436	111.15	134.363	1.01058	0.932351	122673	Tyrosine-protein kinase ABL1 OS=Mus musculus OX=10090 GN=Abl1 PE=1 SV=3
328	TRUE	P28652|KCC2B_MOUSE	66.76	21.96	16	9	Oxidation (M)	25662.2	25752.1	25124	25512.8	12889.1	13069.9	12851.6	12936.8	0.507073	4.42697e-07	60461	Calcium/calmodulin-dependent protein kinase type II subunit beta OS=Mus musculus OX=10090 GN=Camk2b PE=1 SV=2
410	TRUE	P97807|FUMH_MOUSE	60.67	45.56	18	18	Oxidation (M)	23542.4	23089	23091.3	23240.9	9573.09	10026.7	10021.8	9873.87	0.424849	3.85722e-07	54357	Fumarate hydratase, mitochondrial OS=Mus musculus OX=10090 GN=Fh PE=1 SV=3
282	TRUE	Q9QYB8|ADDB_MOUSE	48.84	25.66	18	17	Oxidation (M)	11021.4	11248.7	10625.2	10965.1	6598.26	6746.74	6522.74	6622.58	0.603971	2.34432e-05	80642	Beta-adducin OS=Mus musculus OX=10090 GN=Add2 PE=1 SV=4
3143	TRUE	Q9EST1|GSDMA_MOUSE	27.36	1.79	1	1		393.837	279.664	483.373	385.625	51.7622	77.1186	89.0067	72.6292	0.188342	0.00642841	49593	Gasdermin-A OS=Mus musculus OX=10090 GN=Gsdma PE=1 SV=1
1731	TRUE	Q9CX86|ROA0_MOUSE	12.04	21.31	4	4		1051.63	924.404	994.889	990.307	159.439	497.78	557.043	404.754	0.408716	0.0105589	30530	Heterogeneous nuclear ribonucleoprotein A0 OS=Mus musculus OX=10090 GN=Hnrnpa0 PE=1 SV=1
2789	TRUE	P60761|NEUG_MOUSE	34.19	19.23	2	2		73442.5	73754.2	78612.6	75269.8	18062.8	19100.2	26075.2	21079.4	0.280052	5.68261e-05	7496	Neurogranin OS=Mus musculus OX=10090 GN=Nrgn PE=1 SV=1
194	TRUE	Q80U49|C170B_MOUSE	2.27	13.66	20	18		1594.94	986.893	1597.36	1393.06	1671.2	1034.47	965.252	1223.64	0.87838	0.605713	170821	Centrosomal protein of 170 kDa protein B OS=Mus musculus OX=10090 GN=Cep170b PE=1 SV=2
1001	FALSE	Q9R0Y8|GBRG1_MOUSE	5.47	1.94	1	1		134.234	85.0493	287.133	168.805	255.534	283.237	184.218	240.996	1.42766	0.345825	53407	Gamma-aminobutyric acid receptor subunit gamma-1 OS=Mus musculus OX=10090 GN=Gabrg1 PE=2 SV=2
136	TRUE	Q3UH60|DIP2B_MOUSE	2.42	19.5	27	26		2759.41	2638.11	1633.86	2343.79	2391.37	2599.98	2617.26	2536.2	1.08209	0.625048	171126	Disco-interacting protein 2 homolog B OS=Mus musculus OX=10090 GN=Dip2b PE=1 SV=1
150	TRUE	Q9WUA3|PFKAP_MOUSE	43.5	27.42	25	22	Acetylation (Protein N-term); Oxidation (M)	15780.2	15737.1	15968.2	15828.5	9322.24	9695.13	10170.5	9729.29	0.614669	1.8265e-05	85455	ATP-dependent 6-phosphofructokinase, platelet type OS=Mus musculus OX=10090 GN=Pfkp PE=1 SV=1
414	TRUE	Q99P72|RTN4_MOUSE	16.68	17.04	16	16		6033.56	4698.02	3883.73	4871.77	2674.17	3215.46	2747.76	2879.13	0.590982	0.0373112	126613	Reticulon-4 OS=Mus musculus OX=10090 GN=Rtn4 PE=1 SV=2
2394	TRUE	Q9CZB0|C560_MOUSE	11.95	10.06	2	2		1065.6	1598.68	1117.28	1260.52	2005.84	1767.16	1604.32	1792.44	1.42198	0.0611294	18382	Succinate dehydrogenase cytochrome b560 subunit, mitochondrial OS=Mus musculus OX=10090 GN=Sdhc PE=1 SV=1
2247	TRUE	Q80UW2|FBX2_MOUSE	7.33	6.73	1	1		199.809	161.125	65.2953	142.076	62.416	85.487	71.8214	73.2415	0.515508	0.164741	33676	F-box only protein 2 OS=Mus musculus OX=10090 GN=Fbxo2 PE=1 SV=1
376	TRUE	Q9D0F9|PGM1_MOUSE	36.78	35.23	19	19		5832.9	5116.73	5130.82	5360.15	2825.02	3002.49	2809.95	2879.15	0.53714	0.000529908	61418	Phosphoglucomutase-1 OS=Mus musculus OX=10090 GN=Pgm1 PE=1 SV=4
3097	TRUE	Q99MQ5|COPA1_MOUSE	25.02	1.8	1	1		1191.92	1372.08	857.909	1140.64	444.565	319.473	392.593	385.544	0.338007	0.00819826	65377	Collagen alpha-1(XXV) chain OS=Mus musculus OX=10090 GN=Col25a1 PE=2 SV=2
133	TRUE	Q8CGC7|SYEP_MOUSE	5.12	20.5	27	27		3889.24	3934.16	3770.84	3864.75	3661.94	3420.22	3952.71	3678.29	0.951755	0.312445	170079	Bifunctional glutamate/proline--tRNA ligase OS=Mus musculus OX=10090 GN=Eprs1 PE=1 SV=4
2014	TRUE	Q64433|CH10_MOUSE	39.55	51.96	5	5		4347.12	3951.76	4508.94	4269.27	1519.84	1702.93	1411.77	1544.85	0.361853	0.00012647	10963	10 kDa heat shock protein, mitochondrial OS=Mus musculus OX=10090 GN=Hspe1 PE=1 SV=2
1882	TRUE	Q11136|PEPD_MOUSE	16.51	6.09	3	3		874.331	777.84	782.112	811.428	608.938	363.083	378.498	450.173	0.554791	0.0134273	55029	Xaa-Pro dipeptidase OS=Mus musculus OX=10090 GN=Pepd PE=1 SV=3
674	TRUE	P70414|NAC1_MOUSE	7.93	8.45	8	8		17399.3	15121.7	14780.9	15767.3	15219.9	13736.9	12170.7	13709.1	0.869466	0.162651	108035	Sodium/calcium exchanger 1 OS=Mus musculus OX=10090 GN=Slc8a1 PE=1 SV=1
1239	TRUE	P12849|KAP1_MOUSE	1.13	7.61	8	4		311.037	600.488	506.447	472.657	471.052	515.012	470.154	485.406	1.02697	0.88999	43224	cAMP-dependent protein kinase type I-beta regulatory subunit OS=Mus musculus OX=10090 GN=Prkar1b PE=1 SV=2
795	TRUE	Q3U214|MAST3_MOUSE	3.77	3.18	5	4		723.549	745.324	944.969	804.614	700.757	876.632	520.759	699.383	0.869215	0.445825	144174	Microtubule-associated serine/threonine-protein kinase 3 OS=Mus musculus OX=10090 GN=Mast3 PE=1 SV=3
246	TRUE	Q61001|LAMA5_MOUSE	6.85	5.11	16	16		1227.84	1362.58	1322	1304.14	1386.25	1380.98	1339.56	1368.93	1.04968	0.20248	404054	Laminin subunit alpha-5 OS=Mus musculus OX=10090 GN=Lama5 PE=1 SV=4
2372	TRUE	Q06185|ATP5I_MOUSE	25.81	45.07	3	3		2073.59	2080.96	2258.6	2137.72	1636.17	1460.04	1408.04	1501.42	0.702346	0.00227234	8236	ATP synthase subunit e, mitochondrial OS=Mus musculus OX=10090 GN=Atp5me PE=1 SV=2
2681	TRUE	Q8K341|ATAT_MOUSE	6.93	3.33	1	1		167.023	190.591	275.451	211.022	66.0247	181.751	150.929	132.901	0.6298	0.177273	47164	Alpha-tubulin N-acetyltransferase 1 OS=Mus musculus OX=10090 GN=Atat1 PE=1 SV=1
1182	TRUE	Q9Z1T6|FYV1_MOUSE	1.9	2.05	4	4		367.457	474.78	486.085	442.774	576.657	415.172	434.023	475.284	1.07342	0.635452	236877	1-phosphatidylinositol 3-phosphate 5-kinase OS=Mus musculus OX=10090 GN=Pikfyve PE=1 SV=3
1563	TRUE	Q69ZU6|THS7A_MOUSE	19.95	4.07	7	7		2012.11	1604	1577.19	1731.1	1049.44	1147.13	860.816	1019.13	0.588717	0.0122147	183527	Thrombospondin type-1 domain-containing protein 7A OS=Mus musculus OX=10090 GN=Thsd7a PE=1 SV=2
1596	TRUE	P62835|RAP1A_MOUSE	26.88	8.15	6	1	Oxidation (M)	3296.75	3413.68	3608.46	3439.63	1091.4	1450.92	1669.55	1403.95	0.40817	0.000443378	20987	Ras-related protein Rap-1A OS=Mus musculus OX=10090 GN=Rap1a PE=1 SV=1
809	TRUE	O70443|GNAZ_MOUSE	23.18	32.39	10	9		4081.6	3964.2	4369.09	4138.3	5138.76	5461.69	5927.28	5509.24	1.33128	0.0060765	40850	Guanine nucleotide-binding protein G(z) subunit alpha OS=Mus musculus OX=10090 GN=Gnaz PE=1 SV=4
1853	TRUE	Q8K0D0|CDK17_MOUSE	20.99	3.63	2	2		390.503	361.209	391.872	381.195	239.531	294.594	226.673	253.599	0.665275	0.00525204	59506	Cyclin-dependent kinase 17 OS=Mus musculus OX=10090 GN=Cdk17 PE=1 SV=2
438	TRUE	A2AP18|PLCH2_MOUSE	12.25	8.73	12	12		1455.29	1646.91	1444.55	1515.58	670.785	758.494	1311.47	913.583	0.602792	0.0462804	164297	1-phosphatidylinositol 4,5-bisphosphate phosphodiesterase eta-2 OS=Mus musculus OX=10090 GN=Plch2 PE=1 SV=2
2667	TRUE	P49813|TMOD1_MOUSE	15.87	9.75	3	3		382.015	585.846	536.128	501.33	296.37	332.362	299.111	309.281	0.616922	0.0370861	40466	Tropomodulin-1 OS=Mus musculus OX=10090 GN=Tmod1 PE=1 SV=2
39	TRUE	Q9R0K7|AT2B2_MOUSE	20.38	25.38	40	26	Acetylation (Protein N-term); Oxidation (M)	27945.3	28823.4	28250.7	28339.8	26838.7	27208.2	26605.2	26884	0.948631	0.00949657	132588	Plasma membrane calcium-transporting ATPase 2 OS=Mus musculus OX=10090 GN=Atp2b2 PE=1 SV=2
797	TRUE	Q62419|SH3G1_MOUSE	20.04	12.23	10	5		1200.02	1163.82	1329.98	1231.27	386.544	717.203	532.025	545.257	0.442841	0.00316546	41518	Endophilin-A2 OS=Mus musculus OX=10090 GN=Sh3gl1 PE=1 SV=1
2259	TRUE	Q9CR67|TMM33_MOUSE	22.92	11.34	3	3		1884.87	1845.22	1764.9	1831.67	837.344	1147.3	752.191	912.279	0.49806	0.00182749	28031	Transmembrane protein 33 OS=Mus musculus OX=10090 GN=Tmem33 PE=1 SV=1
1933	TRUE	Q9D1E6|TBCB_MOUSE	3.12	11.07	3	3		1443.8	1410.45	1696.06	1516.77	667.414	1498.25	1728.66	1298.11	0.855839	0.549167	27386	Tubulin-folding cofactor B OS=Mus musculus OX=10090 GN=Tbcb PE=1 SV=2
862	TRUE	Q8BG51|MIRO1_MOUSE	22.62	13.79	9	8		2425.64	3309.91	3288.35	3007.97	1433.25	1598.41	1152.35	1394.67	0.463658	0.00719458	72242	Mitochondrial Rho GTPase 1 OS=Mus musculus OX=10090 GN=Rhot1 PE=1 SV=1
1569	FALSE	Q9Z0G2|SRPK3_MOUSE	6.74	1.59	1	1		285.712	238.324	258.894	260.977	427.611	560.791	235.526	407.976	1.56327	0.198196	62365	SRSF protein kinase 3 OS=Mus musculus OX=10090 GN=Srpk3 PE=1 SV=1
2346	TRUE	O35495|CDK14_MOUSE	2.47	5.12	2	2		270.578	474.073	197.055	313.902	168.835	258.636	319.033	248.834	0.792714	0.525382	52996	Cyclin-dependent kinase 14 OS=Mus musculus OX=10090 GN=Cdk14 PE=1 SV=2
3863	TRUE	Q8BXV2|BRI3B_MOUSE	17.12	3.56	1	1		563.018	506.902	449.041	506.32	286.808	391.846	295.024	324.559	0.641016	0.0181851	28263	BRI3-binding protein OS=Mus musculus OX=10090 GN=Bri3bp PE=1 SV=1
144	TRUE	Q9Z331|K2C6B_MOUSE	4.61	1.78	32	1		259.016	289.75	191.523	246.763	270.111	264.023	308.339	280.824	1.13803	0.349195	60322	Keratin, type II cytoskeletal 6B OS=Mus musculus OX=10090 GN=Krt6b PE=1 SV=3
2340	TRUE	Q9DB72|BTBDH_MOUSE	13.48	6.07	2	2		775.371	757.14	909.742	814.085	167.554	560.76	165.167	297.827	0.365843	0.0210624	52602	BTB/POZ domain-containing protein 17 OS=Mus musculus OX=10090 GN=Btbd17 PE=1 SV=1
1220	TRUE	O35737|HNRH1_MOUSE	26.07	13.59	8	4		2206.69	2518.31	1858.53	2194.51	538.964	566.769	881.404	662.379	0.301835	0.0022321	49199	Heterogeneous nuclear ribonucleoprotein H OS=Mus musculus OX=10090 GN=Hnrnph1 PE=1 SV=3
3177	TRUE	Q9CRD2|EMC2_MOUSE	16.32	8.42	2	2		306.597	282.202	407.073	331.957	193.621	167.239	103.339	154.733	0.466124	0.0191529	34935	ER membrane protein complex subunit 2 OS=Mus musculus OX=10090 GN=Emc2 PE=1 SV=1
1589	TRUE	Q8VD65|PI3R4_MOUSE	1.68	4.2	5	5		665.542	787.705	601.948	685.065	712.486	704.3	698.717	705.167	1.02934	0.731635	152599	Phosphoinositide 3-kinase regulatory subunit 4 OS=Mus musculus OX=10090 GN=Pik3r4 PE=1 SV=3
1327	TRUE	Q9JK42|PDK2_MOUSE	18.65	15.23	6	5		904.878	810.348	728.593	814.606	338.761	349.191	547.489	411.814	0.505537	0.00900243	46041	[Pyruvate dehydrogenase (acetyl-transferring)] kinase isozyme 2, mitochondrial OS=Mus musculus OX=10090 GN=Pdk2 PE=1 SV=2
2389	TRUE	O70492|SNX3_MOUSE	11.05	8.64	1	1		180.168	180.277	132.187	164.211	114.176	118.609	63.051	98.612	0.600522	0.0520312	18757	Sorting nexin-3 OS=Mus musculus OX=10090 GN=Snx3 PE=1 SV=3
888	TRUE	P00920|CAH2_MOUSE	37.6	45	9	9	Acetylation (Protein N-term); Oxidation (M)	19362.7	17887.7	17266.7	18172.4	10236.3	9174.96	9448.87	9620.03	0.529377	0.000255143	29033	Carbonic anhydrase 2 OS=Mus musculus OX=10090 GN=Ca2 PE=1 SV=4
252	TRUE	Q5DTL9|S4A10_MOUSE	14.17	13.77	19	16	Oxidation (M)	4509.64	4716.14	4583.96	4603.25	4247.32	4078.82	3644.91	3990.35	0.866855	0.0317559	125817	Sodium-driven chloride bicarbonate exchanger OS=Mus musculus OX=10090 GN=Slc4a10 PE=1 SV=2
1498	TRUE	Q80X50|UBP2L_MOUSE	9.36	4.07	3	3		593.746	925.685	642.944	720.792	286.507	509.64	549.44	448.529	0.622273	0.1079	116799	Ubiquitin-associated protein 2-like OS=Mus musculus OX=10090 GN=Ubap2l PE=1 SV=1
710	TRUE	Q9D1G1|RAB1B_MOUSE	41.33	30.85	8	4	Acetylation (Protein N-term)	2801.23	3006.06	2996.21	2934.5	1101.05	1064.23	1259.53	1141.61	0.389029	3.68975e-05	22187	Ras-related protein Rab-1B OS=Mus musculus OX=10090 GN=Rab1b PE=1 SV=1
271	FALSE	Q9Z1N9|UN13B_MOUSE	16.57	1.87	5	3		891.475	1044.88	1057.18	997.846	769.85	682.052	816.157	756.02	0.757652	0.0217572	181813	Protein unc-13 homolog B OS=Mus musculus OX=10090 GN=Unc13b PE=1 SV=2
2050	TRUE	O54901|OX2G_MOUSE	29.86	15.83	4	4		2035.65	2529.02	2504.78	2356.49	789.685	824.386	564.971	726.347	0.308233	0.000823517	31256	OX-2 membrane glycoprotein OS=Mus musculus OX=10090 GN=Cd200 PE=1 SV=1
2829	TRUE	Q9D6E4|TTC9B_MOUSE	18.79	3.35	1	1		206.832	202.174	142.791	183.932	109.823	110.709	105.279	108.604	0.590453	0.0219244	25909	Tetratricopeptide repeat protein 9B OS=Mus musculus OX=10090 GN=Ttc9b PE=1 SV=1
49	TRUE	P46460|NSF_MOUSE	63.14	44.76	41	41	Oxidation (M)	80969.1	78199.7	78431.6	79200.1	38977.1	38864.9	38394.4	38745.5	0.48921	1.49634e-06	82613	Vesicle-fusing ATPase OS=Mus musculus OX=10090 GN=Nsf PE=1 SV=2
837	TRUE	P51150|RAB7A_MOUSE	39.15	53.14	11	11		5384.83	5258.09	4708.96	5117.29	2572.26	2507.71	2687.21	2589.06	0.505943	0.000293585	23490	Ras-related protein Rab-7a OS=Mus musculus OX=10090 GN=Rab7a PE=1 SV=2
1438	TRUE	Q8R0A7|K0513_MOUSE	46.97	15.97	7	7		5782.78	5406.93	5426.38	5538.7	2086.6	2334.94	2232.38	2217.97	0.40045	1.97284e-05	46318	Uncharacterized protein KIAA0513 OS=Mus musculus OX=10090 GN=Kiaa0513 PE=1 SV=1
126	TRUE	Q80X90|FLNB_MOUSE	1.6	8.15	21	18	N-ethylmaleimide on cysteines	957.761	729.517	664.732	784.003	774.502	778.486	658.772	737.254	0.94037	0.655517	277825	Filamin-B OS=Mus musculus OX=10090 GN=Flnb PE=1 SV=3
2488	TRUE	P21126|UBL4A_MOUSE	1.88	12.74	2	2		673.771	166.184	574.507	471.487	448.819	516.505	535.292	500.205	1.06091	0.864205	17801	Ubiquitin-like protein 4A OS=Mus musculus OX=10090 GN=Ubl4a PE=1 SV=1
907	TRUE	P17751|TPIS_MOUSE	60.12	42.97	11	11	Oxidation (M)	77040.1	76507.4	77193.5	76913.7	35998.6	37781.5	36407.5	36729.2	0.477538	2.5632e-07	26713	Triosephosphate isomerase OS=Mus musculus OX=10090 GN=Tpi1 PE=1 SV=5
2064	TRUE	Q8R4H2|ARHGC_MOUSE	6.91	1.23	2	2		193.386	207.139	296.504	232.343	135.989	155.198	225.319	172.169	0.741011	0.227148	172349	Rho guanine nucleotide exchange factor 12 OS=Mus musculus OX=10090 GN=Arhgef12 PE=1 SV=2
1954	TRUE	Q3UJB9|EDC4_MOUSE	11.06	1.14	1	1		81.0148	102.64	108.375	97.3434	67.032	84.8567	70.7487	74.2125	0.762378	0.0805832	152484	Enhancer of mRNA-decapping protein 4 OS=Mus musculus OX=10090 GN=Edc4 PE=1 SV=2
2003	TRUE	P70290|EM55_MOUSE	9.87	2.36	1	1		216.381	129.977	167.615	171.324	124.324	123.807	120.744	122.958	0.717694	0.125551	52227	55 kDa erythrocyte membrane protein OS=Mus musculus OX=10090 GN=Mpp1 PE=1 SV=1
1661	TRUE	P47746|CNR1_MOUSE	15.69	9.73	4	4		1988.6	1301.28	1429.65	1573.17	2390.73	2512.64	2337.61	2413.66	1.53426	0.0180155	52831	Cannabinoid receptor 1 OS=Mus musculus OX=10090 GN=Cnr1 PE=1 SV=1
2356	TRUE	P62869|ELOB_MOUSE	19.85	32.2	4	4		2196.78	2243.5	2229.71	2223.33	533.823	1064.34	981.999	860.055	0.386832	0.00118224	13170	Elongin-B OS=Mus musculus OX=10090 GN=Elob PE=1 SV=1
1709	TRUE	Q80YN3|BCAS1_MOUSE	46.7	8.21	4	4		5287.54	5554.65	5175.13	5339.1	2958.15	2947.37	3078.98	2994.83	0.560924	4.07508e-05	67378	Breast carcinoma-amplified sequence 1 homolog OS=Mus musculus OX=10090 GN=Bcas1 PE=1 SV=3
1838	TRUE	Q8K4R4|PITC1_MOUSE	27	9.34	4	4		1029.31	1270.86	1111.22	1137.13	497.153	388.432	552.699	479.428	0.421612	0.00155511	38384	Cytoplasmic phosphatidylinositol transfer protein 1 OS=Mus musculus OX=10090 GN=Pitpnc1 PE=1 SV=1
1719	TRUE	Q62083|PICK1_MOUSE	3.02	2.88	1	1		51.0805	112.129	108.77	90.66	63.0817	71.4955	76.7488	70.442	0.776991	0.373718	46597	PRKCA-binding protein OS=Mus musculus OX=10090 GN=Pick1 PE=1 SV=2
2048	FALSE	Q7TN33|CELF6_MOUSE	16.45	1.74	1	1		298.336	280.896	257.67	278.967	88.4301	92.6212	186.429	122.494	0.439096	0.010107	48206	CUGBP Elav-like family member 6 OS=Mus musculus OX=10090 GN=Celf6 PE=2 SV=1
610	TRUE	Q8BG32|PSD11_MOUSE	22.19	39.1	15	15	Acetylation (Protein N-term)	2110.53	1786.7	1551.37	1816.2	930.11	967.497	683.368	860.325	0.473695	0.0066637	47437	26S proteasome non-ATPase regulatory subunit 11 OS=Mus musculus OX=10090 GN=Psmd11 PE=1 SV=3
1087	FALSE	Q99N57|RAF1_MOUSE	40.23	1.7	3	1		759.241	798.993	762.405	773.546	549.51	518.065	530.998	532.857	0.68885	0.000105182	72917	RAF proto-oncogene serine/threonine-protein kinase OS=Mus musculus OX=10090 GN=Raf1 PE=1 SV=2
1447	TRUE	O70251|EF1B_MOUSE	37.66	27.56	5	5		3569.82	3765.24	3221.61	3518.89	1367.35	1291.16	1533.42	1397.31	0.397088	0.000261639	24694	Elongation factor 1-beta OS=Mus musculus OX=10090 GN=Eef1b PE=1 SV=5
566	TRUE	Q14BI2|GRM2_MOUSE	19.22	11.93	14	11		4911.52	5355.33	5347.18	5204.67	3258.41	3455.27	2310.56	3008.08	0.577957	0.00455905	95887	Metabotropic glutamate receptor 2 OS=Mus musculus OX=10090 GN=Grm2 PE=1 SV=2
2373	TRUE	Q6P9S0|MTSS2_MOUSE	13.14	4.62	3	3		475.878	583.894	510.844	523.539	301.089	449.534	344.915	365.18	0.697521	0.0434661	76844	Protein MTSS 2 OS=Mus musculus OX=10090 GN=Mtss2 PE=1 SV=1
968	TRUE	Q9QYJ0|DNJA2_MOUSE	39.71	19.9	9	9		7296.91	6307.95	7554.66	7053.17	2955.19	3042.35	2962.41	2986.65	0.423448	0.00043645	45746	DnaJ homolog subfamily A member 2 OS=Mus musculus OX=10090 GN=Dnaja2 PE=1 SV=1
2816	TRUE	P70379|FGF14_MOUSE	22.8	6.48	2	2		3717.74	3036.29	3706.65	3486.89	1790.84	1333.87	1041.58	1388.76	0.398281	0.00259389	27764	Fibroblast growth factor 14 OS=Mus musculus OX=10090 GN=Fgf14 PE=2 SV=1
547	TRUE	D3YUB6|BTBD8_MOUSE	3.27	10.74	14	14		6397.94	3078.95	6784.44	5420.45	4928.03	1761.24	5394.53	4027.93	0.7431	0.443354	190845	BTB/POZ domain-containing protein 8 OS=Mus musculus OX=10090 GN=Btbd8 PE=1 SV=2
1982	TRUE	Q5M8N0|CNRP1_MOUSE	56.25	25.61	4	4		12096.7	11433.1	11892	11807.3	5068.77	4859.62	4855.03	4927.81	0.417354	5.02992e-06	18612	CB1 cannabinoid receptor-interacting protein 1 OS=Mus musculus OX=10090 GN=Cnrip1 PE=1 SV=1
2131	TRUE	Q9CR98|F136A_MOUSE	41.91	17.39	3	3	Acetylation (Protein N-term)	2531.21	2406.17	2649.58	2528.99	876.4	791.254	709.678	792.444	0.313344	3.41798e-05	15674	Protein FAM136A OS=Mus musculus OX=10090 GN=Fam136a PE=1 SV=1
1481	TRUE	P97492|RGS14_MOUSE	12.66	9.87	5	5		495.217	714.794	732.472	647.494	423.651	482.775	431.988	446.138	0.689022	0.0623351	59847	Regulator of G-protein signaling 14 OS=Mus musculus OX=10090 GN=Rgs14 PE=1 SV=2
303	TRUE	P08113|ENPL_MOUSE	36.81	19.95	17	16		4816.66	4040.06	4628.7	4495.14	2193.64	2264.12	2241.59	2233.12	0.496785	0.000649676	92476	Endoplasmin OS=Mus musculus OX=10090 GN=Hsp90b1 PE=1 SV=2
856	TRUE	Q9DCL9|PUR6_MOUSE	6.98	20	8	8		6137.95	6047.45	5826.13	6003.84	658.923	4306.95	4299.83	3088.57	0.514431	0.0749387	47006	Bifunctional phosphoribosylaminoimidazole carboxylase/phosphoribosylaminoimidazole succinocarboxamide synthetase OS=Mus musculus OX=10090 GN=Paics PE=1 SV=4
1642	TRUE	Q8VDM6|HNRL1_MOUSE	18.08	2.91	2	2		109.926	142.287	78.4412	110.218	212.375	237.466	208.637	219.493	1.99144	0.00599869	96002	Heterogeneous nuclear ribonucleoprotein U-like protein 1 OS=Mus musculus OX=10090 GN=Hnrnpul1 PE=1 SV=1
212	TRUE	Q8BJ42|DLGP2_MOUSE	14.13	22.1	23	20	Acetylation (Protein N-term)	5126.89	5514.73	5495.3	5378.97	4524.31	4907.06	4966.32	4799.23	0.892221	0.0364268	119074	Disks large-associated protein 2 OS=Mus musculus OX=10090 GN=Dlgap2 PE=1 SV=2
1357	TRUE	P31650|S6A11_MOUSE	5.33	11.64	7	7		7407.14	7625.13	5781.49	6937.92	7506.1	7910.91	7602.72	7673.24	1.10599	0.283647	69961	Sodium- and chloride-dependent GABA transporter 3 OS=Mus musculus OX=10090 GN=Slc6a11 PE=1 SV=2
3032	TRUE	P70202|LXN_MOUSE	20.33	9.46	2	2		2392.95	1823.97	2254.33	2157.08	914.253	864.929	463.163	747.448	0.346509	0.00320683	25492	Latexin OS=Mus musculus OX=10090 GN=Lxn PE=1 SV=2
1014	TRUE	Q3TDK6|ROGDI_MOUSE	19.96	34.84	9	9	Acetylation (Protein N-term)	1875.55	2999.65	2975.16	2616.79	733.99	1157.94	1083.45	991.792	0.379012	0.0144425	32100	Protein rogdi homolog OS=Mus musculus OX=10090 GN=Rogdi PE=1 SV=2
349	TRUE	P84091|AP2M1_MOUSE	21.82	42.99	19	19	Oxidation (M)	27608.4	30862.4	31442.7	29971.2	23479.4	24513.1	22744.2	23578.9	0.786719	0.00792047	49655	AP-2 complex subunit mu OS=Mus musculus OX=10090 GN=Ap2m1 PE=1 SV=1
502	TRUE	Q68FL4|SAHH3_MOUSE	14.92	8.81	15	5	Acetylation (Protein N-term)	2363.94	3040.35	2573.16	2659.15	2072.94	2122.45	2039.72	2078.37	0.781591	0.0448331	66899	Putative adenosylhomocysteinase 3 OS=Mus musculus OX=10090 GN=Ahcyl2 PE=1 SV=1
861	TRUE	O54865|GCYB1_MOUSE	57.25	16.13	9	9		24093.1	22431.1	23137.4	23220.6	7543.5	7898.39	7504.68	7648.86	0.3294	6.21412e-06	70598	Guanylate cyclase soluble subunit beta-1 OS=Mus musculus OX=10090 GN=Gucy1b1 PE=1 SV=1
120	TRUE	P68372|TBB4B_MOUSE	62.96	2.7	21	1		64385.7	63819.1	63828.8	64011.2	38445.6	39028.3	39514.1	38996	0.609206	2.60515e-07	49831	Tubulin beta-4B chain OS=Mus musculus OX=10090 GN=Tubb4b PE=1 SV=1
2507	TRUE	Q68ED7|CRTC1_MOUSE	14.64	3.65	2	2		317.414	505.025	586.135	469.525	202.51	122.23	255.205	193.315	0.411724	0.0354582	66945	CREB-regulated transcription coactivator 1 OS=Mus musculus OX=10090 GN=Crtc1 PE=1 SV=1
836	TRUE	P51863|VA0D1_MOUSE	49.86	30.48	9	9		34377.4	32416.6	32625.1	33139.7	18574.9	19124.8	18898.7	18866.2	0.569291	2.42179e-05	40301	V-type proton ATPase subunit d 1 OS=Mus musculus OX=10090 GN=Atp6v0d1 PE=1 SV=2
678	TRUE	Q60676|PPP5_MOUSE	37.69	18.64	9	9		4608.45	4006.31	4436.18	4350.31	1960.48	2140	2190.02	2096.83	0.481996	0.000302242	56877	Serine/threonine-protein phosphatase 5 OS=Mus musculus OX=10090 GN=Ppp5c PE=1 SV=3
727	TRUE	Q8BMF4|ODP2_MOUSE	29.4	20.56	11	11	Oxidation (M)	6575.63	6561.75	6533.84	6557.07	5439.54	5631.44	5204.65	5425.21	0.827383	0.00079979	67942	Dihydrolipoyllysine-residue acetyltransferase component of pyruvate dehydrogenase complex, mitochondrial OS=Mus musculus OX=10090 GN=Dlat PE=1 SV=2
3575	TRUE	Q80UU9|PGRC2_MOUSE	5.9	3.69	1	1		186.28	218.609	185.144	196.678	191.815	117.279	176.729	161.941	0.823383	0.24105	23334	Membrane-associated progesterone receptor component 2 OS=Mus musculus OX=10090 GN=Pgrmc2 PE=1 SV=2
2598	TRUE	P35505|FAAA_MOUSE	23.02	8.35	3	3		1105.47	1244.12	1099.42	1149.67	504.529	728.304	611.704	614.846	0.534801	0.00260981	46176	Fumarylacetoacetase OS=Mus musculus OX=10090 GN=Fah PE=1 SV=2
3141	TRUE	O89079|COPE_MOUSE	19.97	3.9	1	1		586.554	369.1	519.709	491.788	237.739	261.621	256.326	251.895	0.512203	0.0207085	34567	Coatomer subunit epsilon OS=Mus musculus OX=10090 GN=Cope PE=1 SV=3
276	TRUE	Q8BFR5|EFTU_MOUSE	54.01	48.89	20	20	Oxidation (M)	16406.2	16203.9	16421	16343.7	9099.02	8738.43	8587.44	8808.3	0.538943	1.44728e-06	49508	Elongation factor Tu, mitochondrial OS=Mus musculus OX=10090 GN=Tufm PE=1 SV=1
872	TRUE	P30416|FKBP4_MOUSE	15.24	16.16	7	7		2269.78	1511.34	1585.37	1788.83	779.83	1093.5	510.289	794.54	0.444168	0.0278602	51572	Peptidyl-prolyl cis-trans isomerase FKBP4 OS=Mus musculus OX=10090 GN=Fkbp4 PE=1 SV=5
513	TRUE	P48453|PP2BB_MOUSE	10.04	22.29	15	9	Oxidation (M)	4091.3	5604.85	5674.88	5123.68	3783.8	4140.91	4082.12	4002.28	0.781134	0.10103	59173	Serine/threonine-protein phosphatase 2B catalytic subunit beta isoform OS=Mus musculus OX=10090 GN=Ppp3cb PE=1 SV=2
2714	TRUE	Q9D358|PPAC_MOUSE	24.83	24.05	3	3		7029.79	7264.51	6704.44	6999.58	3842.17	4125.17	2937.66	3635	0.519317	0.00102417	18192	Low molecular weight phosphotyrosine protein phosphatase OS=Mus musculus OX=10090 GN=Acp1 PE=1 SV=3
31	TRUE	Q6PIC6|AT1A3_MOUSE	28.93	26.36	41	24	N-ethylmaleimide on cysteines; Oxidation (M)	185452	186493	184821	185589	142498	152809	155151	150153	0.809062	0.000827417	111692	Sodium/potassium-transporting ATPase subunit alpha-3 OS=Mus musculus OX=10090 GN=Atp1a3 PE=1 SV=1
1279	TRUE	Q3THS6|METK2_MOUSE	43.12	15.95	5	5		1913.95	2008.91	1812.36	1911.74	701.58	799.326	709.777	736.894	0.385457	5.44602e-05	43689	S-adenosylmethionine synthase isoform type-2 OS=Mus musculus OX=10090 GN=Mat2a PE=1 SV=2
754	TRUE	Q80ZF8|AGRB3_MOUSE	16.9	5.58	8	7		3464.24	2825.22	2469.5	2919.65	1860.55	1746.91	2108.11	1905.19	0.65254	0.0306968	171314	Adhesion G protein-coupled receptor B3 OS=Mus musculus OX=10090 GN=Adgrb3 PE=1 SV=2
3438	TRUE	Q9D1I5|MCEE_MOUSE	19.82	7.3	1	1		214.182	118.064	217.7	183.315	53.8075	72.8313	68.3858	65.0082	0.354625	0.0233845	19017	Methylmalonyl-CoA epimerase, mitochondrial OS=Mus musculus OX=10090 GN=Mcee PE=1 SV=1
1318	TRUE	Q69ZK9|NLGN2_MOUSE	12.53	3.95	8	3		1985.77	1697.73	1473.05	1718.85	1351.26	1372.4	1338.91	1354.19	0.787846	0.0702787	90989	Neuroligin-2 OS=Mus musculus OX=10090 GN=Nlgn2 PE=1 SV=2
423	TRUE	Q9D0K2|SCOT1_MOUSE	46.75	24.62	10	10	Oxidation (M)	21612.1	23178.4	22854.7	22548.4	11039.6	11737.3	10981.9	11252.9	0.499055	2.98757e-05	55989	Succinyl-CoA:3-ketoacid coenzyme A transferase 1, mitochondrial OS=Mus musculus OX=10090 GN=Oxct1 PE=1 SV=1
1186	TRUE	Q8BH95|ECHM_MOUSE	39.03	28.97	7	7	Oxidation (M)	6970.89	6673.99	6328.57	6657.82	2375.55	2314.48	2809.92	2499.98	0.375496	6.78018e-05	31474	Enoyl-CoA hydratase, mitochondrial OS=Mus musculus OX=10090 GN=Echs1 PE=1 SV=1
1034	TRUE	Q9D7G0|PRPS1_MOUSE	31.7	9.43	7	3		4697.91	4658.89	3860.48	4405.76	2386.92	2210.66	2194.92	2264.17	0.513911	0.00156424	34834	Ribose-phosphate pyrophosphokinase 1 OS=Mus musculus OX=10090 GN=Prps1 PE=1 SV=4
2203	TRUE	P34152|FAK1_MOUSE	3.92	2.09	3	2		243.104	187.896	342.61	257.87	278.887	298.533	307.168	294.863	1.14345	0.466679	119243	Focal adhesion kinase 1 OS=Mus musculus OX=10090 GN=Ptk2 PE=1 SV=4
1317	TRUE	Q3TLI0|TPC10_MOUSE	18.23	1.75	2	2		266.14	271.309	257.817	265.089	230.077	234.789	207.179	224.015	0.845058	0.0119251	141493	Trafficking protein particle complex subunit 10 OS=Mus musculus OX=10090 GN=Trappc10 PE=1 SV=3
3183	TRUE	Q3TUH1|TAM41_MOUSE	30.26	3.86	1	1	Acetylation (Protein N-term)	216.945	203.453	215.232	211.876	102.716	129.358	109.907	113.994	0.538019	0.000408749	37828	Phosphatidate cytidylyltransferase, mitochondrial OS=Mus musculus OX=10090 GN=Tamm41 PE=1 SV=2
1823	TRUE	P60882|MEGF8_MOUSE	6.07	1.22	2	2		503.449	643.317	600.836	582.534	462.703	160.464	541.002	388.056	0.666152	0.189536	297487	Multiple epidermal growth factor-like domains protein 8 OS=Mus musculus OX=10090 GN=Megf8 PE=1 SV=2
2065	TRUE	P62270|RS18_MOUSE	38.86	17.11	3	3		1728.88	1483.5	1497.13	1569.84	660.306	643.566	712.524	672.132	0.428155	0.000400752	17719	40S ribosomal protein S18 OS=Mus musculus OX=10090 GN=Rps18 PE=1 SV=3
1253	TRUE	P35278|RAB5C_MOUSE	14.26	18.52	6	3		1762.75	3470.24	2663.55	2632.18	1093.79	1060.41	1594.54	1249.58	0.47473	0.0572248	23413	Ras-related protein Rab-5C OS=Mus musculus OX=10090 GN=Rab5c PE=1 SV=2
2237	TRUE	Q06335|APLP2_MOUSE	17.03	1.84	2	1		152.064	142.766	99.6167	131.482	71.74	84.4515	71.3011	75.8309	0.576739	0.0291636	80467	Amyloid beta precursor like protein 2 OS=Mus musculus OX=10090 GN=Aplp2 PE=1 SV=4
1221	TRUE	Q9JK48|SHLB1_MOUSE	33.76	7.4	4	3		1266.91	1291.21	1390.3	1316.14	752.306	852.672	803.09	802.689	0.609882	0.000418081	40855	Endophilin-B1 OS=Mus musculus OX=10090 GN=Sh3glb1 PE=1 SV=1
1658	FALSE	Q5SV42|ILEUC_MOUSE	21.13	2.67	1	1		161.176	195.583	172.266	176.342	64.29	84.502	104.562	84.4512	0.478906	0.00398638	41920	Leukocyte elastase inhibitor C OS=Mus musculus OX=10090 GN=Serpinb1c PE=1 SV=1
2896	TRUE	Q80WC7|AGFG2_MOUSE	4.51	1.67	1	1		444.686	506.289	364.784	438.586	371.704	400.537	404.296	392.179	0.894189	0.33357	48968	Arf-GAP domain and FG repeat-containing protein 2 OS=Mus musculus OX=10090 GN=Agfg2 PE=1 SV=1
4204	TRUE	Q9CY57|CHTOP_MOUSE	22.31	5.22	1	1		124.526	132.696	98.2106	118.477	72.1723	67.3514	59.6182	66.3806	0.560281	0.00914428	26585	Chromatin target of PRMT1 protein OS=Mus musculus OX=10090 GN=Chtop PE=1 SV=2
1805	TRUE	Q6P5F6|S39AA_MOUSE	0.67	3.48	4	4		204.657	462.649	352.059	339.788	280.711	296.131	347.579	308.141	0.90686	0.703619	94394	Zinc transporter ZIP10 OS=Mus musculus OX=10090 GN=Slc39a10 PE=1 SV=1
493	TRUE	Q3UTQ8|CDKL5_MOUSE	5.16	16.84	12	12		787.639	564.104	1157.13	836.291	761.857	584.456	486.032	610.782	0.730346	0.302743	105489	Cyclin-dependent kinase-like 5 OS=Mus musculus OX=10090 GN=Cdkl5 PE=1 SV=1
1662	TRUE	Q9CZP5|BCS1_MOUSE	1.81	2.15	1	1		68.9056	75.1963	56.5565	66.8861	5053.72	18.6569	18.6569	1697.01	25.3716	0.386418	47406	Mitochondrial chaperone BCS1 OS=Mus musculus OX=10090 GN=Bcs1l PE=1 SV=1
1137	TRUE	Q91VE0|S27A4_MOUSE	9.91	8.71	6	5		723.291	943.717	467.262	711.423	552.152	313.225	319.37	394.916	0.555106	0.116605	72319	Long-chain fatty acid transport protein 4 OS=Mus musculus OX=10090 GN=Slc27a4 PE=1 SV=1
1035	TRUE	E9Q8I9|FRY_MOUSE	0.9	1.46	5	5		1029.14	1592.97	909.69	1177.27	715.403	1300.92	1313.02	1109.78	0.942674	0.826582	339093	Protein furry homolog OS=Mus musculus OX=10090 GN=Fry PE=1 SV=1
1279	FALSE	Q91X83|METK1_MOUSE	18.62	2.78	1	1		260.679	302.582	384.757	316.006	202.847	151.161	159.092	171.033	0.541234	0.0219653	43509	S-adenosylmethionine synthase isoform type-1 OS=Mus musculus OX=10090 GN=Mat1a PE=1 SV=1
602	TRUE	Q921M3|SF3B3_MOUSE	1.35	6.98	8	8		1072.34	1654.87	1441.1	1389.44	1655.29	1363.73	1328.86	1449.29	1.04308	0.778713	135550	Splicing factor 3B subunit 3 OS=Mus musculus OX=10090 GN=Sf3b3 PE=1 SV=1
746	TRUE	P70404|IDHG1_MOUSE	53.16	35.62	11	11	Oxidation (M)	20983.8	21746.6	22408.1	21712.8	10849.1	10774.3	10517.3	10713.6	0.493421	1.30668e-05	42785	Isocitrate dehydrogenase [NAD] subunit gamma 1, mitochondrial OS=Mus musculus OX=10090 GN=Idh3g PE=1 SV=1
1434	TRUE	P97494|GSH1_MOUSE	7.53	7.69	5	5		646.112	481.773	550.292	559.392	377.04	505.198	486.291	456.177	0.815486	0.172278	72571	Glutamate--cysteine ligase catalytic subunit OS=Mus musculus OX=10090 GN=Gclc PE=1 SV=4
1778	TRUE	P61082|UBC12_MOUSE	39.99	21.86	4	4		3612.95	4003.71	3673.43	3763.36	1641.9	1424.22	1399.11	1488.41	0.395501	9.33805e-05	20900	NEDD8-conjugating enzyme Ubc12 OS=Mus musculus OX=10090 GN=Ube2m PE=1 SV=1
1680	TRUE	E9QAT4|SC16A_MOUSE	4.56	1.36	3	3		457.399	469.638	324.423	417.153	394.759	353.39	331.031	359.727	0.862336	0.315662	254202	Protein transport protein Sec16A OS=Mus musculus OX=10090 GN=Sec16a PE=1 SV=1
1828	TRUE	Q99KE1|MAOM_MOUSE	3.85	4.07	3	2		284.141	356.982	325.349	322.157	298.781	256.735	328.829	294.781	0.915023	0.408758	65799	NAD-dependent malic enzyme, mitochondrial OS=Mus musculus OX=10090 GN=Me2 PE=1 SV=1
2408	TRUE	P29533|VCAM1_MOUSE	20.82	2.84	2	2		208.773	214.736	198.828	207.446	109.726	18.6569	135.874	88.0856	0.42462	0.0290638	81317	Vascular cell adhesion protein 1 OS=Mus musculus OX=10090 GN=Vcam1 PE=1 SV=1
2788	TRUE	Q9JLJ1|SELK_MOUSE	8.24	21.28	2	2		485.789	606.24	455.645	515.891	415.652	461.408	428.556	435.205	0.843599	0.167917	10611	Selenoprotein K OS=Mus musculus OX=10090 GN=Selenok PE=1 SV=3
1412	TRUE	Q9JHR7|IDE_MOUSE	23.54	6.97	7	7		1210.46	745.361	1001.01	985.608	424.062	436.229	382.38	414.224	0.420272	0.0135005	117772	Insulin-degrading enzyme OS=Mus musculus OX=10090 GN=Ide PE=1 SV=1
2555	TRUE	P60867|RS20_MOUSE	47.17	19.33	2	2		3484.37	3664.83	3569.81	3573.01	1437.08	1535.27	1357.11	1443.15	0.403904	8.3449e-06	13373	40S ribosomal protein S20 OS=Mus musculus OX=10090 GN=Rps20 PE=1 SV=1
1059	TRUE	O88685|PRS6A_MOUSE	25.07	15.61	6	6		1273.77	1297.93	1336.74	1302.81	702	668.802	481.419	617.407	0.473903	0.000646655	49549	26S proteasome regulatory subunit 6A OS=Mus musculus OX=10090 GN=Psmc3 PE=1 SV=2
1282	FALSE	Q91X78|ERLN1_MOUSE	27.99	6.9	2	2		708.966	594.477	601.538	634.994	1131.7	996.383	1057.98	1062.02	1.67249	0.00137098	39182	Erlin-1 OS=Mus musculus OX=10090 GN=Erlin1 PE=1 SV=2
354	TRUE	Q8BYR5|CAPS2_MOUSE	1.14	4.86	12	6		447.101	1300.62	754.691	834.136	767.619	623.437	682.863	691.307	0.828769	0.60261	147841	Calcium-dependent secretion activator 2 OS=Mus musculus OX=10090 GN=Cadps2 PE=1 SV=2
2538	TRUE	P39087|GRIK2_MOUSE	2.69	4.07	3	3		365.225	747.48	300.478	471.061	401.582	287.554	390.096	359.744	0.763689	0.482931	102486	Glutamate receptor ionotropic, kainate 2 OS=Mus musculus OX=10090 GN=Grik2 PE=1 SV=4
24	TRUE	F6SEU4|SYGP1_MOUSE	24.02	35.07	44	41	Oxidation (M)	75090.7	74886.8	76089.7	75355.7	64561.1	67161.4	69013.1	66911.9	0.887946	0.00327449	148238	Ras/Rap GTPase-activating protein SynGAP OS=Mus musculus OX=10090 GN=Syngap1 PE=1 SV=2
1873	TRUE	P84104|SRSF3_MOUSE	37.87	17.68	4	3		9500.18	9882.27	10117.6	9833.36	6326.09	6825.71	6664.25	6605.35	0.671729	0.000155929	19330	Serine/arginine-rich splicing factor 3 OS=Mus musculus OX=10090 GN=Srsf3 PE=1 SV=1
108	TRUE	B1AWN6|SCN2A_MOUSE	6.36	12.01	27	17	Acetylation (Protein N-term)	5835.13	2618.17	4803.8	4419.03	6268.05	6313.42	5298.16	5959.88	1.34868	0.199832	227945	Sodium channel protein type 2 subunit alpha OS=Mus musculus OX=10090 GN=Scn2a PE=1 SV=1
2479	TRUE	P60764|RAC3_MOUSE	39.25	7.29	3	1		283.855	239.099	303.803	275.586	64.8129	78.1112	73.4194	72.1145	0.261677	0.00047876	21379	Ras-related C3 botulinum toxin substrate 3 OS=Mus musculus OX=10090 GN=Rac3 PE=1 SV=1
233	TRUE	Q812A2|SRGP3_MOUSE	21.2	17.2	17	15		2484.12	2851.33	3148.99	2828.15	1668.95	1702.27	2013.94	1795.06	0.634711	0.00955381	124420	SLIT-ROBO Rho GTPase-activating protein 3 OS=Mus musculus OX=10090 GN=Srgap3 PE=1 SV=1
55	TRUE	Q8BTM8|FLNA_MOUSE	11.24	16.77	37	34		1449.94	1070.28	1647.87	1389.36	1861.44	1806.64	1919.41	1862.49	1.34054	0.0518099	281222	Filamin-A OS=Mus musculus OX=10090 GN=Flna PE=1 SV=5
3655	TRUE	Q66JS6|EI3JB_MOUSE	4.89	4.18	1	1		118.803	131.783	141.38	130.655	127.119	41.2824	121.023	96.475	0.738394	0.295358	29486	Eukaryotic translation initiation factor 3 subunit J-B OS=Mus musculus OX=10090 GN=Eif3j2 PE=1 SV=1
533	TRUE	Q9Z0E0|NCDN_MOUSE	17.84	18.66	14	14	Oxidation (M)	22834.3	20146.6	18706.5	20562.5	16494.9	15852.8	16221.6	16189.8	0.787346	0.0233131	78895	Neurochondrin OS=Mus musculus OX=10090 GN=Ncdn PE=1 SV=1
545	TRUE	P35235|PTN11_MOUSE	33.11	22.43	13	13		2690.06	3089.64	2365.05	2714.92	1160.63	1194.19	1079.68	1144.83	0.421682	0.00178209	68035	Tyrosine-protein phosphatase non-receptor type 11 OS=Mus musculus OX=10090 GN=Ptpn11 PE=1 SV=3
916	TRUE	Q5SSM3|RHG44_MOUSE	19.95	11.06	8	8		1540.01	1645.9	1773.95	1653.29	1153.41	764.929	834.085	917.474	0.554939	0.00587072	88994	Rho GTPase-activating protein 44 OS=Mus musculus OX=10090 GN=Arhgap44 PE=1 SV=1
3404	TRUE	Q8C0L9|GPCP1_MOUSE	5.94	1.48	1	1		250.187	160.83	203.953	204.99	235.979	248.468	234.084	239.51	1.1684	0.257918	76579	Glycerophosphocholine phosphodiesterase GPCPD1 OS=Mus musculus OX=10090 GN=Gpcpd1 PE=1 SV=1
1416	TRUE	Q8C079|STRP1_MOUSE	4.38	3.58	3	3		1647.54	1651.93	1053.64	1451.04	1099.42	1535.17	841.502	1158.7	0.798529	0.36095	95585	Striatin-interacting protein 1 OS=Mus musculus OX=10090 GN=Strip1 PE=1 SV=2
1488	TRUE	O54833|CSK22_MOUSE	16.87	12.57	4	4		1537.61	1110.04	1702.4	1450.02	764.619	287.349	339.022	463.664	0.319764	0.0132254	41215	Casein kinase II subunit alpha' OS=Mus musculus OX=10090 GN=Csnk2a2 PE=1 SV=1
3422	TRUE	P18293|ANPRA_MOUSE	41.7	1.04	1	1		1960.42	2009.64	2047.54	2005.87	1111.97	1176.69	1053.56	1114.08	0.555409	3.3737e-05	119109	Atrial natriuretic peptide receptor 1 OS=Mus musculus OX=10090 GN=Npr1 PE=1 SV=2
2759	TRUE	Q61335|BAP31_MOUSE	16.9	3.67	1	1		117.76	82.3233	108.581	102.888	64.6601	67.3272	50.7509	60.9127	0.592028	0.0236222	27957	B-cell receptor-associated protein 31 OS=Mus musculus OX=10090 GN=Bcap31 PE=1 SV=4
2441	TRUE	P21447|MDR1A_MOUSE	3.26	0.78	1	1		199.085	110.604	159.993	156.561	220.727	258.685	121.95	200.454	1.28036	0.413337	140647	ATP-dependent translocase ABCB1 OS=Mus musculus OX=10090 GN=Abcb1a PE=1 SV=3
2468	TRUE	Q9EQ06|DHB11_MOUSE	21.56	9.06	3	3		481.81	499.816	411.138	464.254	286.374	204.815	185.642	225.61	0.485963	0.00436209	32881	Estradiol 17-beta-dehydrogenase 11 OS=Mus musculus OX=10090 GN=Hsd17b11 PE=1 SV=1
2074	TRUE	P63028|TCTP_MOUSE	37.9	21.51	4	4		6244.56	5862.06	5914.88	6007.17	1456.91	1965.66	1534.71	1652.43	0.275076	2.54852e-05	19462	Translationally-controlled tumor protein OS=Mus musculus OX=10090 GN=Tpt1 PE=1 SV=1
766	TRUE	P62196|PRS8_MOUSE	0.93	20.2	8	7	Acetylation (Protein N-term)	923.653	20238.3	19955.7	13705.9	583.669	14561.3	13801.5	9648.83	0.703991	0.632065	45626	26S proteasome regulatory subunit 8 OS=Mus musculus OX=10090 GN=Psmc5 PE=1 SV=1
1386	TRUE	Q8CHP8|PGP_MOUSE	46.94	26.48	8	8		4709.58	4726.88	4761.4	4732.62	2172.95	2419.21	2276.65	2289.6	0.483792	4.75213e-06	34541	Glycerol-3-phosphate phosphatase OS=Mus musculus OX=10090 GN=Pgp PE=1 SV=1
613	TRUE	Q8JZN5|ACAD9_MOUSE	25.6	19.84	11	11	Acetylation (Protein N-term)	1600.13	1481.63	1611.13	1564.3	678.032	792.253	952.293	807.526	0.516222	0.00108076	68722	Complex I assembly factor ACAD9, mitochondrial OS=Mus musculus OX=10090 GN=Acad9 PE=1 SV=2
462	TRUE	Q91WD5|NDUS2_MOUSE	58.65	35.85	14	14	Oxidation (M)	24313.9	24187.8	24747.3	24416.3	11043.4	11091.8	11592	11242.4	0.460446	7.02394e-07	52626	NADH dehydrogenase [ubiquinone] iron-sulfur protein 2, mitochondrial OS=Mus musculus OX=10090 GN=Ndufs2 PE=1 SV=1
2852	TRUE	Q91YN5|UAP1_MOUSE	59.72	2.68	2	1		80.9873	61.5671	63.4832	68.6792	18.6569	18.6569	18.6569	18.6569	0.271652	0.00126531	58609	UDP-N-acetylhexosamine pyrophosphorylase OS=Mus musculus OX=10090 GN=Uap1 PE=1 SV=1
1904	TRUE	P03888|NU1M_MOUSE	33.86	8.18	3	3	Oxidation (M)	4339.15	4245.1	4334.03	4306.09	2888.57	2843.32	2538.69	2756.86	0.640223	0.000169907	36059	NADH-ubiquinone oxidoreductase chain 1 OS=Mus musculus OX=10090 GN=Mtnd1 PE=1 SV=3
3398	TRUE	Q99J09|MEP50_MOUSE	14.82	4.39	1	1		313.982	289.721	257.404	287.036	221.879	154.454	125.087	167.14	0.582296	0.0221141	36943	Methylosome protein 50 OS=Mus musculus OX=10090 GN=Wdr77 PE=1 SV=1
761	TRUE	Q8R3V5|SHLB2_MOUSE	51.34	20.75	9	8		4857.99	4432.56	4491.53	4594.03	1411.98	1515.69	1394.37	1440.68	0.313598	2.19511e-05	44503	Endophilin-B2 OS=Mus musculus OX=10090 GN=Sh3glb2 PE=1 SV=2
4009	TRUE	Q61120|SHC3_MOUSE	48.75	4.01	1	1		82.2631	82.5131	50.3194	71.6985	18.6569	18.6569	18.6569	18.6569	0.260213	0.00769574	52121	SHC-transforming protein 3 OS=Mus musculus OX=10090 GN=Shc3 PE=1 SV=2
2528	TRUE	P61971|NTF2_MOUSE	51.18	24.41	3	3		9148.13	9061.89	9521.66	9243.89	3747.32	3786.25	3473.94	3669.17	0.396929	5.39536e-06	14478	Nuclear transport factor 2 OS=Mus musculus OX=10090 GN=Nutf2 PE=1 SV=1
1260	TRUE	Q8BJI1|S6A17_MOUSE	8.68	12.65	8	8		4652.13	4366.01	3596.66	4204.93	3691.01	3627.66	3511.18	3609.95	0.858504	0.136068	81071	Sodium-dependent neutral amino acid transporter SLC6A17 OS=Mus musculus OX=10090 GN=Slc6a17 PE=1 SV=1
3118	TRUE	Q9CX00|IST1_MOUSE	21.07	4.97	2	2		470.221	424.148	360.631	418.333	264.899	274.004	222.281	253.728	0.606521	0.00980012	39468	IST1 homolog OS=Mus musculus OX=10090 GN=Ist1 PE=1 SV=1
361	TRUE	Q8CAA7|PGM2L_MOUSE	35.95	28.18	18	18	Oxidation (M)	6945.08	7536.97	7027.98	7170.01	4564.17	4507.84	4877.05	4649.69	0.648491	0.000318441	70279	Glucose 1,6-bisphosphate synthase OS=Mus musculus OX=10090 GN=Pgm2l1 PE=1 SV=1
2513	TRUE	Q9QZB9|DCTN5_MOUSE	28.39	6.04	1	1		632.318	466.707	510.556	536.527	231.009	169.508	180.364	193.627	0.36089	0.00294887	20141	Dynactin subunit 5 OS=Mus musculus OX=10090 GN=Dctn5 PE=1 SV=1
2880	TRUE	Q8K406|LGI3_MOUSE	1.26	4.93	2	2		154.892	506.133	334.669	331.898	157.22	441.855	235.487	278.188	0.838171	0.705434	61818	Leucine-rich repeat LGI family member 3 OS=Mus musculus OX=10090 GN=Lgi3 PE=1 SV=1
3603	TRUE	Q8C996|TM163_MOUSE	12.21	4.86	1	1		196.003	145.358	187.307	176.222	95.9449	139.028	128.129	121.034	0.686826	0.0529962	31193	Transmembrane protein 163 OS=Mus musculus OX=10090 GN=Tmem163 PE=1 SV=1
1676	TRUE	Q60972|RBBP4_MOUSE	37.87	9.88	4	4		1105.08	1496.35	1452.38	1351.27	273.105	297.105	326.734	298.981	0.221259	0.00108067	47656	Histone-binding protein RBBP4 OS=Mus musculus OX=10090 GN=Rbbp4 PE=1 SV=5
2314	TRUE	A2BH40|ARI1A_MOUSE	3.08	0.44	2	1		146.187	193.222	137.215	158.875	81.3629	166.59	160.395	136.116	0.856752	0.521993	242092	AT-rich interactive domain-containing protein 1A OS=Mus musculus OX=10090 GN=Arid1a PE=1 SV=1
1976	TRUE	P62301|RS13_MOUSE	15.37	14.57	2	2		1246.19	1475.45	1180.04	1300.56	386.347	885.467	428.322	566.712	0.435744	0.0160511	17222	40S ribosomal protein S13 OS=Mus musculus OX=10090 GN=Rps13 PE=1 SV=2
3203	TRUE	Q60870|REEP5_MOUSE	3.77	5.41	1	1		1987.38	1747.32	2171.92	1968.87	1984	1592.18	1867.72	1814.63	0.921661	0.413394	21051	Receptor expression-enhancing protein 5 OS=Mus musculus OX=10090 GN=Reep5 PE=1 SV=1
2442	TRUE	Q91YX5|LGAT1_MOUSE	20.18	2.43	1	1		440.557	432.763	381.705	418.342	281.314	300.242	334.478	305.345	0.729893	0.00943946	43088	Acyl-CoA:lysophosphatidylglycerol acyltransferase 1 OS=Mus musculus OX=10090 GN=Lpgat1 PE=1 SV=1
2353	TRUE	P34884|MIF_MOUSE	56.78	21.74	3	3	Oxidation (M)	24235.3	23214.9	22376.1	23275.4	8524.06	8671.6	8440.47	8545.37	0.367142	1.08827e-05	12504	Macrophage migration inhibitory factor OS=Mus musculus OX=10090 GN=Mif PE=1 SV=2
1171	TRUE	O09061|PSB1_MOUSE	23.32	37.08	8	8		7126.64	6685.64	7025.44	6945.91	2426.01	3410.59	3819.97	3218.86	0.463418	0.00101578	26372	Proteasome subunit beta type-1 OS=Mus musculus OX=10090 GN=Psmb1 PE=1 SV=1
3279	TRUE	A2A8Z1|OSBL9_MOUSE	3.42	1.77	1	1		125.31	40.6978	93.2428	86.4169	68.1837	83.3838	22.6592	58.0756	0.672039	0.407846	83109	Oxysterol-binding protein-related protein 9 OS=Mus musculus OX=10090 GN=Osbpl9 PE=1 SV=1
3126	TRUE	O09053|WRN_MOUSE	41.36	0.86	1	1	Oxidation (M)	3444.41	3607.88	3451.01	3501.1	2444.66	2532.27	2546.68	2507.87	0.716309	8.9996e-05	157204	Bifunctional 3'-5' exonuclease/ATP-dependent helicase WRN OS=Mus musculus OX=10090 GN=Wrn PE=1 SV=3
220	TRUE	P48678|LMNA_MOUSE	47.15	33.38	21	21		3966.95	3984.44	3820.22	3923.87	1077.6	1170.26	1279.17	1175.68	0.299621	3.89868e-06	74238	Prelamin-A/C OS=Mus musculus OX=10090 GN=Lmna PE=1 SV=2
3051	TRUE	Q3UYV9|NCBP1_MOUSE	0.59	1.39	1	1		348.785	353.769	86.3222	262.959	212.483	197.461	199.449	203.131	0.772483	0.535905	91927	Nuclear cap-binding protein subunit 1 OS=Mus musculus OX=10090 GN=Ncbp1 PE=1 SV=2
225	TRUE	Q9Z1Q9|SYVC_MOUSE	17.8	20.51	24	24	Acetylation (Protein N-term)	3723.78	3767.12	4004.89	3831.93	3423.54	3535.35	3471.56	3476.82	0.907328	0.0189286	140215	Valine--tRNA ligase OS=Mus musculus OX=10090 GN=Vars1 PE=1 SV=1
668	TRUE	Q9DC69|NDUA9_MOUSE	36.38	34.75	12	12	Oxidation (M)	8724.61	8444.18	8209.2	8459.33	3280.92	3539.74	4095.3	3638.65	0.430135	6.93429e-05	42525	NADH dehydrogenase [ubiquinone] 1 alpha subcomplex subunit 9, mitochondrial OS=Mus musculus OX=10090 GN=Ndufa9 PE=1 SV=2
1631	TRUE	Q99NH0|ANR17_MOUSE	1.27	0.77	2	2		477.328	777.179	524.442	592.983	506.787	632.986	510.256	550.009	0.92753	0.694985	274213	Ankyrin repeat domain-containing protein 17 OS=Mus musculus OX=10090 GN=Ankrd17 PE=1 SV=2
456	TRUE	Q9CPW0|CNTP2_MOUSE	47.47	12.01	14	14		4137.46	4077.91	4130.09	4115.15	1906.84	1771.79	1977.15	1885.26	0.458126	3.82792e-06	148197	Contactin-associated protein-like 2 OS=Mus musculus OX=10090 GN=Cntnap2 PE=1 SV=2
273	TRUE	Q91ZA3|PCCA_MOUSE	20.44	36.6	23	23		6372.84	6157.15	6461.58	6330.52	5321.19	5014.63	5637.4	5324.41	0.841069	0.00749143	79922	Propionyl-CoA carboxylase alpha chain, mitochondrial OS=Mus musculus OX=10090 GN=Pcca PE=1 SV=2
1320	TRUE	P63158|HMGB1_MOUSE	4.87	25.58	6	6		5747	37429.1	33097.2	25424.4	2643.88	3147.83	30449.4	12080.4	0.475148	0.379466	24894	High mobility group protein B1 OS=Mus musculus OX=10090 GN=Hmgb1 PE=1 SV=2
1549	TRUE	Q9Z2U0|PSA7_MOUSE	18.14	28.63	6	6		3998.75	3520.89	2527.83	3349.16	1593.66	1998.71	1764.06	1785.48	0.533114	0.025265	27855	Proteasome subunit alpha type-7 OS=Mus musculus OX=10090 GN=Psma7 PE=1 SV=1
799	TRUE	Q9CZM2|RL15_MOUSE	57.36	49.02	12	12		13290.6	13437.7	13588.6	13439	7910.85	7843.23	8122.88	7958.99	0.592232	1.39393e-06	24146	60S ribosomal protein L15 OS=Mus musculus OX=10090 GN=Rpl15 PE=1 SV=4
2425	TRUE	Q9D6U8|F162A_MOUSE	9.49	20.65	3	3		838.942	777.358	658.869	758.39	465.997	582.703	693.827	580.842	0.765889	0.103145	17725	Protein FAM162A OS=Mus musculus OX=10090 GN=Fam162a PE=1 SV=1
1910	TRUE	Q5DTX6|JCAD_MOUSE	3.4	0.91	1	1		160.492	184.533	167.831	170.952	104.033	241.995	93.3432	146.457	0.856713	0.639367	144798	Junctional cadherin 5-associated protein OS=Mus musculus OX=10090 GN=Jcad PE=1 SV=2
2747	TRUE	Q91WC0|SETD3_MOUSE	4.99	1.52	1	1		61.9064	73.78	73.5703	69.7522	18.6569	50.5617	68.8199	46.0128	0.659661	0.192761	67176	Actin-histidine N-methyltransferase OS=Mus musculus OX=10090 GN=Setd3 PE=1 SV=1
663	TRUE	Q923T9|KCC2G_MOUSE	41.77	7.75	10	4		8446.77	7905.98	8409.31	8254.02	3840.08	4186.5	3680.21	3902.26	0.472771	4.56603e-05	59607	Calcium/calmodulin-dependent protein kinase type II subunit gamma OS=Mus musculus OX=10090 GN=Camk2g PE=1 SV=1
1652	TRUE	O55106|STRN_MOUSE	28.81	4.1	4	3		730.476	664.387	849.127	747.997	356.201	348.225	282.77	329.065	0.439929	0.00205665	85966	Striatin OS=Mus musculus OX=10090 GN=Strn PE=1 SV=2
3305	TRUE	Q9JJW6|ALRF2_MOUSE	26.28	5.05	1	1		590.474	430.72	496.933	506.042	265.646	273.045	261.521	266.737	0.527104	0.00674274	23730	Aly/REF export factor 2 OS=Mus musculus OX=10090 GN=Alyref2 PE=1 SV=1
915	TRUE	P62962|PROF1_MOUSE	49.96	65.71	8	8	Oxidation (M)	16656.9	17942.3	17763.2	17454.1	7614.43	7290.63	7085.39	7330.15	0.419966	1.93715e-05	14957	Profilin-1 OS=Mus musculus OX=10090 GN=Pfn1 PE=1 SV=2
1254	TRUE	Q8R574|KPRB_MOUSE	32.12	8.4	4	3		1771.67	1575.67	1444.13	1597.16	587.026	742.115	622.521	650.554	0.40732	0.000872455	40881	Phosphoribosyl pyrophosphate synthase-associated protein 2 OS=Mus musculus OX=10090 GN=Prpsap2 PE=1 SV=1
635	TRUE	Q9D8N0|EF1G_MOUSE	21.2	27.92	12	12	Acetylation (Protein N-term)	9354.82	8030.55	9166.39	8850.58	6476.79	6116.83	6974.9	6522.84	0.736995	0.00850605	50061	Elongation factor 1-gamma OS=Mus musculus OX=10090 GN=Eef1g PE=1 SV=3
1066	TRUE	Q6KAR6|EXOC3_MOUSE	16.83	11.26	7	7		1302.06	806.231	1064.39	1057.56	498.523	632.673	385.199	505.465	0.477954	0.0260636	86455	Exocyst complex component 3 OS=Mus musculus OX=10090 GN=Exoc3 PE=1 SV=2
2976	TRUE	Q8R1I1|QCR9_MOUSE	50.02	37.5	2	2		1614.91	1457.79	1594.44	1555.71	441.029	486.822	451.745	459.865	0.295598	2.82216e-05	7446	Cytochrome b-c1 complex subunit 9 OS=Mus musculus OX=10090 GN=Uqcr10 PE=1 SV=1
46	TRUE	Q5SQX6|CYFP2_MOUSE	18.35	18.91	41	24	Oxidation (M)	15788.7	16958.7	15515.6	16087.7	17938.5	18105.6	17942.4	17995.5	1.11859	0.0128732	145659	Cytoplasmic FMR1-interacting protein 2 OS=Mus musculus OX=10090 GN=Cyfip2 PE=1 SV=2
3014	TRUE	Q62426|CYTB_MOUSE	29.79	32.65	2	2		1131.77	1144.72	1278.43	1184.98	302.7	473.523	356.551	377.591	0.318649	0.000302405	11046	Cystatin-B OS=Mus musculus OX=10090 GN=Cstb PE=1 SV=1
1836	TRUE	Q922Q8|LRC59_MOUSE	22.2	14.66	4	4		1869.27	1593.76	1581.04	1681.36	606.615	906.113	891.117	801.282	0.476568	0.00289051	34877	Leucine-rich repeat-containing protein 59 OS=Mus musculus OX=10090 GN=Lrrc59 PE=1 SV=1
669	TRUE	Q8BWF0|SSDH_MOUSE	30.89	29.45	14	14		13637.3	15787.9	12740.9	14055.4	7932.45	7656.22	7865.45	7818.04	0.556232	0.00235172	55968	Succinate-semialdehyde dehydrogenase, mitochondrial OS=Mus musculus OX=10090 GN=Aldh5a1 PE=1 SV=1
85	TRUE	Q05920|PYC_MOUSE	8.21	33.28	34	34	Oxidation (M)	12005.3	12491.6	11950.7	12149.2	11698.8	11599.6	12020.8	11773.1	0.969041	0.153374	129685	Pyruvate carboxylase, mitochondrial OS=Mus musculus OX=10090 GN=Pc PE=1 SV=1
4190	TRUE	Q8C6B2|RTKN_MOUSE	12.07	2.66	1	1		124.333	257.783	215.259	199.125	18.6569	85.8707	80.9667	61.8314	0.310516	0.0377735	63013	Rhotekin OS=Mus musculus OX=10090 GN=Rtkn PE=1 SV=3
2024	TRUE	Q6ZPF3|TIAM2_MOUSE	10.57	1.34	2	1		251.565	227.655	362.86	280.694	161.254	49.6302	158.185	123.023	0.438282	0.046882	192567	Rho guanine nucleotide exchange factor TIAM2 OS=Mus musculus OX=10090 GN=Tiam2 PE=1 SV=2
683	TRUE	Q8CHT1|NGEF_MOUSE	29.58	15.63	11	11		2873.3	2774.68	2893.98	2847.32	1653.41	1487.15	1850.58	1663.71	0.584309	0.000442761	82199	Ephexin-1 OS=Mus musculus OX=10090 GN=Ngef PE=1 SV=1
713	TRUE	Q8BH04|PCKGM_MOUSE	5.94	20.31	11	11		1543.59	1851.36	1834.08	1743.01	951.348	532.513	2093.07	1192.31	0.684052	0.312474	70528	Phosphoenolpyruvate carboxykinase [GTP], mitochondrial OS=Mus musculus OX=10090 GN=Pck2 PE=1 SV=1
1031	TRUE	P62874|GBB1_MOUSE	55.52	7.65	8	3	Acetylation (Protein N-term); N-ethylmaleimide on cysteines	9623.8	9042.87	9375.05	9347.24	3216.91	3081.04	3317.52	3205.16	0.342899	4.56762e-06	37377	Guanine nucleotide-binding protein G(I)/G(S)/G(T) subunit beta-1 OS=Mus musculus OX=10090 GN=Gnb1 PE=1 SV=3
1552	TRUE	O55013|TPPC3_MOUSE	10.97	26.11	5	5		2735.83	2276.76	1857.99	2290.2	2587.14	4633.25	4612.9	3944.43	1.72231	0.0844722	20302	Trafficking protein particle complex subunit 3 OS=Mus musculus OX=10090 GN=Trappc3 PE=1 SV=1
181	TRUE	O35927|CTND2_MOUSE	1.06	23.9	25	22		4298.87	4125.51	3701.06	4041.81	3559.99	4393.66	4537.42	4163.69	1.03015	0.747058	135000	Catenin delta-2 OS=Mus musculus OX=10090 GN=Ctnnd2 PE=1 SV=1
2319	TRUE	Q80T79|CSMD3_MOUSE	9.24	0.32	2	1		75.1259	18.6569	18.6569	37.4799	64.1128	83.2245	72.8426	73.3933	1.95821	0.141105	405762	CUB and sushi domain-containing protein 3 OS=Mus musculus OX=10090 GN=Csmd3 PE=1 SV=3
1271	TRUE	Q8K3J1|NDUS8_MOUSE	54.88	25.47	6	6	Oxidation (M)	19404.6	20650.7	20435.4	20163.6	9411.12	9133.25	9241.74	9262.04	0.459345	1.00411e-05	24038	NADH dehydrogenase [ubiquinone] iron-sulfur protein 8, mitochondrial OS=Mus musculus OX=10090 GN=Ndufs8 PE=1 SV=1
1029	TRUE	Q9Z2W8|GRIA4_MOUSE	6.43	1.66	7	1		177.528	182.552	271.489	210.523	251.242	268.063	238.774	252.693	1.20031	0.253888	100847	Glutamate receptor 4 OS=Mus musculus OX=10090 GN=Gria4 PE=1 SV=2
1720	TRUE	Q99JF8|PSIP1_MOUSE	0.3	3.79	3	2		243.491	299.341	298.798	280.543	467.573	502.848	78.5735	349.665	1.24639	0.640845	59697	PC4 and SFRS1-interacting protein OS=Mus musculus OX=10090 GN=Psip1 PE=1 SV=1
4044	TRUE	P70362|UFD1_MOUSE	23.11	3.91	1	1		455.781	375.138	376.874	402.598	213.962	266.673	244.24	241.625	0.600166	0.00630302	34481	Ubiquitin recognition factor in ER-associated degradation protein 1 OS=Mus musculus OX=10090 GN=Ufd1 PE=1 SV=2
953	TRUE	P14869|RLA0_MOUSE	25	23.97	8	8		2664.36	3434.75	3167.52	3088.88	1857.29	1498.94	1556.11	1637.45	0.530111	0.00448919	34216	60S acidic ribosomal protein P0 OS=Mus musculus OX=10090 GN=Rplp0 PE=1 SV=3
2379	TRUE	Q9D1D4|TMEDA_MOUSE	11.95	14.61	3	3		1166.01	1233.21	1279.94	1226.39	503.447	801.803	986.64	763.964	0.622938	0.032961	24911	Transmembrane emp24 domain-containing protein 10 OS=Mus musculus OX=10090 GN=Tmed10 PE=1 SV=1
2894	TRUE	Q08509|EPS8_MOUSE	18.54	1.58	1	1		126.725	130.125	157.304	138.051	52.0093	81.0799	80.7061	71.2651	0.516222	0.00808716	91737	Epidermal growth factor receptor kinase substrate 8 OS=Mus musculus OX=10090 GN=Eps8 PE=1 SV=2
180	TRUE	Q7TMY8|HUWE1_MOUSE	15.37	3.11	11	11		1218.46	1197.24	929.074	1114.93	773.997	800.475	587.213	720.562	0.646286	0.0264011	482635	E3 ubiquitin-protein ligase HUWE1 OS=Mus musculus OX=10090 GN=Huwe1 PE=1 SV=5
470	TRUE	P62631|EF1A2_MOUSE	50.21	17.93	13	5	Oxidation (M)	36770.6	36105.1	37561.5	36812.4	17088	18087.3	18454	17876.4	0.48561	5.48134e-06	50454	Elongation factor 1-alpha 2 OS=Mus musculus OX=10090 GN=Eef1a2 PE=1 SV=1
2636	TRUE	Q8BNY6|NCS1_MOUSE	7.7	5.79	1	1		220.596	339.873	315.204	291.891	148.386	211.935	260.203	206.841	0.708624	0.155545	21879	Neuronal calcium sensor 1 OS=Mus musculus OX=10090 GN=Ncs1 PE=1 SV=3
473	TRUE	Q8R151|ZNFX1_MOUSE	37.04	7.44	12	12		1491.47	1539.77	1447.46	1492.9	791.445	808.633	903.077	834.385	0.558902	0.000113624	218828	NFX1-type zinc finger-containing protein 1 OS=Mus musculus OX=10090 GN=Znfx1 PE=1 SV=3
1405	TRUE	Q9QYF9|NDRG3_MOUSE	32.69	22.4	6	6		10023.1	7674.98	8444.91	8714.34	2860.91	2298.9	3030.79	2730.2	0.3133	0.00117923	41555	Protein NDRG3 OS=Mus musculus OX=10090 GN=Ndrg3 PE=1 SV=1
176	TRUE	Q91XM9|DLG2_MOUSE	21.84	34.98	28	25	Oxidation (M)	6148.02	5382.81	5493.23	5674.69	4638.05	4312.31	4363.12	4437.83	0.782039	0.00884649	94880	Disks large homolog 2 OS=Mus musculus OX=10090 GN=Dlg2 PE=1 SV=2
1796	TRUE	P46978|STT3A_MOUSE	3.19	3.55	4	3		9972.54	852	10362.5	7062.33	8247.23	8273.65	8887.43	8469.44	1.19924	0.674807	80598	Dolichyl-diphosphooligosaccharide--protein glycosyltransferase subunit STT3A OS=Mus musculus OX=10090 GN=Stt3a PE=1 SV=1
88	TRUE	P63017|HSP7C_MOUSE	69.97	33.9	34	20	Oxidation (M)	69484.4	68378.6	68902.9	68922	34189.2	33434.7	33971	33864.9	0.491352	9.19962e-08	70871	Heat shock cognate 71 kDa protein OS=Mus musculus OX=10090 GN=Hspa8 PE=1 SV=1
742	TRUE	Q8R1Q8|DC1L1_MOUSE	29.61	24.86	10	10		2644.57	2972.42	2633.59	2750.19	1015.03	1082.31	728.555	941.963	0.342508	0.000311022	56614	Cytoplasmic dynein 1 light intermediate chain 1 OS=Mus musculus OX=10090 GN=Dync1li1 PE=1 SV=1
2147	TRUE	Q8BLV3|SL9A7_MOUSE	3.63	0.96	1	1		83.2763	68.1246	75.209	75.5366	140.295	95.7901	60.7712	98.952	1.30999	0.374048	80289	Sodium/hydrogen exchanger 7 OS=Mus musculus OX=10090 GN=Slc9a7 PE=1 SV=1
1472	TRUE	O35405|PLD3_MOUSE	42.13	10.25	5	5		8290.2	7585.54	7341.99	7739.24	3722.79	3880.04	3926.7	3843.18	0.496583	0.000179791	54389	5'-3' exonuclease PLD3 OS=Mus musculus OX=10090 GN=Pld3 PE=1 SV=1
207	TRUE	P68368|TBA4A_MOUSE	68.52	7.59	21	3		127128	127752	127961	127614	77846	79387.6	78538.5	78590.7	0.615849	7.09058e-08	49924	Tubulin alpha-4A chain OS=Mus musculus OX=10090 GN=Tuba4a PE=1 SV=1
3555	TRUE	P97314|CSRP2_MOUSE	47.38	7.77	1	1		47.8482	85.2747	76.025	69.716	18.6569	18.6569	18.6569	18.6569	0.267612	0.0105252	20926	Cysteine and glycine-rich protein 2 OS=Mus musculus OX=10090 GN=Csrp2 PE=1 SV=3
1598	TRUE	Q9CQC6|5MP2_MOUSE	18.61	8.59	4	4		1072.84	900.876	1185.14	1052.95	390.805	462.827	670.553	508.061	0.482511	0.00982656	48043	eIF5-mimic protein 2 OS=Mus musculus OX=10090 GN=Bzw1 PE=1 SV=1
549	TRUE	Q9DBJ1|PGAM1_MOUSE	50.32	32.68	10	6	Oxidation (M)	21480.2	22080.3	19964.9	21175.1	4838.09	5550.63	5156.5	5181.74	0.244709	1.74449e-05	28832	Phosphoglycerate mutase 1 OS=Mus musculus OX=10090 GN=Pgam1 PE=1 SV=3
2559	TRUE	Q61176|ARGI1_MOUSE	29.47	9.29	3	3		914.407	837.19	730.859	827.485	457.293	478.608	434.815	456.905	0.552161	0.00247548	34808	Arginase-1 OS=Mus musculus OX=10090 GN=Arg1 PE=1 SV=1
661	TRUE	Q60932|VDAC1_MOUSE	69.84	54.73	14	14		41820.9	40965.1	41399.6	41395.2	20828.6	21113.8	21162.8	21035.1	0.508152	1.80293e-07	32351	Voltage-dependent anion-selective channel protein 1 OS=Mus musculus OX=10090 GN=Vdac1 PE=1 SV=3
1153	TRUE	P09671|SODM_MOUSE	30.35	41.89	9	9		19513	19185.4	18802.7	19167	5969.67	8224.18	8266.28	7486.71	0.390604	0.000119342	24603	Superoxide dismutase [Mn], mitochondrial OS=Mus musculus OX=10090 GN=Sod2 PE=1 SV=3
3794	TRUE	Q6PE15|ABHDA_MOUSE	4.44	3.7	1	1		244.178	91.4593	317.491	217.709	73.1746	245.415	69.5726	129.388	0.594314	0.373864	33040	Palmitoyl-protein thioesterase ABHD10, mitochondrial OS=Mus musculus OX=10090 GN=Abhd10 PE=1 SV=1
3359	TRUE	A2AR02|PPIG_MOUSE	3.8	1.2	1	1		184.756	257.245	167.443	203.148	94.5209	233.393	162.795	163.569	0.805175	0.461305	88325	Peptidyl-prolyl cis-trans isomerase G OS=Mus musculus OX=10090 GN=Ppig PE=1 SV=1
1761	TRUE	Q8K0D5|EFGM_MOUSE	6.91	5.33	4	4		397.702	303.476	450.047	383.742	328.413	265.307	333.025	308.915	0.805008	0.194971	83550	Elongation factor G, mitochondrial OS=Mus musculus OX=10090 GN=Gfm1 PE=1 SV=1
2612	TRUE	A2ASS6|TITIN_MOUSE	44.64	0.09	2	2	N-ethylmaleimide on cysteines	79088.9	78660.7	75943.9	77897.8	52550.9	53802.1	51146.4	52499.8	0.673958	3.44505e-05	3906488	Titin OS=Mus musculus OX=10090 GN=Ttn PE=1 SV=1
1505	TRUE	Q6GQS1|SCMC3_MOUSE	12.81	12.42	5	5		768.505	658.296	697.121	707.974	534.252	586.636	394.575	505.154	0.713521	0.0368158	52497	Calcium-binding mitochondrial carrier protein SCaMC-3 OS=Mus musculus OX=10090 GN=Slc25a23 PE=1 SV=1
118	TRUE	P62259|1433E_MOUSE	54.09	63.92	22	19	Acetylation (Protein N-term); Oxidation (M)	60414.4	61026.8	63984.9	61808.7	28581.1	27222.1	27757.5	27853.6	0.450641	8.42224e-06	29174	14-3-3 protein epsilon OS=Mus musculus OX=10090 GN=Ywhae PE=1 SV=1
1439	TRUE	Q6ZWV3|RL10_MOUSE	50.57	25.23	7	7		13934	13464	14172.7	13856.9	7571.11	7502.89	7859.17	7644.39	0.551667	1.21849e-05	24604	60S ribosomal protein L10 OS=Mus musculus OX=10090 GN=Rpl10 PE=1 SV=3
2517	TRUE	Q64442|DHSO_MOUSE	1.46	10.08	3	3		512.616	325.515	551.42	463.184	363.801	474.595	429.871	422.756	0.912717	0.626471	38249	Sorbitol dehydrogenase OS=Mus musculus OX=10090 GN=Sord PE=1 SV=3
407	TRUE	Q99K51|PLST_MOUSE	7.49	25.08	18	15	Oxidation (M)	11609.2	11807.7	12124.5	11847.1	11274.3	11421.2	11794.2	11496.6	0.97041	0.179201	70742	Plastin-3 OS=Mus musculus OX=10090 GN=Pls3 PE=1 SV=3
2137	FALSE	P0CG50|UBC_MOUSE	36.55	4.63	3	3		26428	27471.3	27456.3	27118.5	21735.7	22303.6	22407.6	22149	0.816748	0.00024972	82550	Polyubiquitin-C OS=Mus musculus OX=10090 GN=Ubc PE=1 SV=2
1305	TRUE	Q8R326|PSPC1_MOUSE	23.28	13.58	7	6		1882.07	1789.07	1574.68	1748.6	833.707	662.452	1006.4	834.185	0.477058	0.00245794	58758	Paraspeckle component 1 OS=Mus musculus OX=10090 GN=Pspc1 PE=1 SV=1
3406	TRUE	Q5XG69|F169A_MOUSE	3.53	1.2	1	1		139.697	89.3599	199.221	142.759	81.8729	54.1346	186.773	107.593	0.75367	0.531279	73240	Soluble lamin-associated protein of 75 kDa OS=Mus musculus OX=10090 GN=Fam169a PE=1 SV=3
2142	TRUE	Q9WUP7|UCHL5_MOUSE	0.99	7.29	2	2		363.09	370.961	161.082	298.378	325.638	328.578	147.673	267.296	0.895832	0.750088	37617	Ubiquitin carboxyl-terminal hydrolase isozyme L5 OS=Mus musculus OX=10090 GN=Uchl5 PE=1 SV=2
1523	TRUE	Q8R127|SCPDL_MOUSE	27.5	9.56	4	4		4123.62	3970.99	4001.38	4032	2071.72	2642.11	2419.61	2377.81	0.589736	0.000659535	47129	Saccharopine dehydrogenase-like oxidoreductase OS=Mus musculus OX=10090 GN=Sccpdh PE=1 SV=1
939	TRUE	O70435|PSA3_MOUSE	32	34.51	9	9	Acetylation (Protein N-term); Oxidation (M)	6526.47	7497.43	7684.57	7236.16	2877.72	3438.31	2660.18	2992.07	0.413489	0.000576807	28405	Proteasome subunit alpha type-3 OS=Mus musculus OX=10090 GN=Psma3 PE=1 SV=3
2810	TRUE	Q3TL44|NLRX1_MOUSE	6.68	1.03	1	1		89.3369	155.051	167.38	137.256	199.35	152.878	197.792	183.34	1.33575	0.182597	107831	NLR family member X1 OS=Mus musculus OX=10090 GN=Nlrx1 PE=1 SV=1
2494	TRUE	Q68EF4|GRM4_MOUSE	1.88	1.21	2	1		85.4203	93.7857	113.409	97.5383	205.038	101.596	70.3772	125.67	1.28842	0.535323	101824	Metabotropic glutamate receptor 4 OS=Mus musculus OX=10090 GN=Grm4 PE=1 SV=2
3628	TRUE	Q9QUH0|GLRX1_MOUSE	44.71	11.21	1	1		6769.01	6201.74	5825.25	6265.33	2078.57	2276.82	2219.94	2191.78	0.349826	0.000130824	11871	Glutaredoxin-1 OS=Mus musculus OX=10090 GN=Glrx PE=1 SV=3
2148	TRUE	Q9D952|EVPL_MOUSE	17.67	0.88	2	2		697.205	440.625	562.838	566.889	319.192	305.184	348.368	324.248	0.571978	0.0320522	232012	Envoplakin OS=Mus musculus OX=10090 GN=Evpl PE=1 SV=3
1313	TRUE	Q8R361|RFIP5_MOUSE	0.28	13.18	6	6		581.371	3069.65	2819.36	2156.79	2140.89	1038.7	2631.98	1937.19	0.89818	0.823193	69553	Rab11 family-interacting protein 5 OS=Mus musculus OX=10090 GN=Rab11fip5 PE=1 SV=2
1721	TRUE	P97315|CSRP1_MOUSE	63.5	33.16	6	6		34929.6	34960.2	33871	34586.9	15120.2	14738.7	15165.3	15008.1	0.433923	8.7453e-07	20583	Cysteine and glycine-rich protein 1 OS=Mus musculus OX=10090 GN=Csrp1 PE=1 SV=3
471	TRUE	P47911|RL6_MOUSE	34.09	38.18	15	15		11277.6	11323.5	11208.4	11269.8	9612.52	9403.53	9079.44	9365.16	0.830995	0.000275901	33510	60S ribosomal protein L6 OS=Mus musculus OX=10090 GN=Rpl6 PE=1 SV=3
415	TRUE	Q8BIJ6|SYIM_MOUSE	33.91	22.13	18	18		4943.27	5435.89	4932.91	5104.02	3082.5	2754.84	2669.31	2835.55	0.555552	0.000403784	112804	Isoleucine--tRNA ligase, mitochondrial OS=Mus musculus OX=10090 GN=Iars2 PE=1 SV=1
278	TRUE	Q922D8|C1TC_MOUSE	9.09	22.99	20	19		7398.78	7478.95	7377.5	7418.41	998.293	5135.11	4034.72	3389.38	0.456887	0.0311976	101200	C-1-tetrahydrofolate synthase, cytoplasmic OS=Mus musculus OX=10090 GN=Mthfd1 PE=1 SV=4
469	TRUE	P61161|ARP2_MOUSE	62.59	30.96	11	11	Oxidation (M)	17239.6	17786.6	17588.7	17538.3	6528.58	6653.64	6853.08	6678.43	0.380792	5.12492e-07	44761	Actin-related protein 2 OS=Mus musculus OX=10090 GN=Actr2 PE=1 SV=1
639	TRUE	Q9CZS1|AL1B1_MOUSE	29.54	15.22	11	8		2956.23	2285.94	2631.2	2624.46	1132.25	1125.55	1337.03	1198.28	0.456581	0.0022677	57553	Aldehyde dehydrogenase X, mitochondrial OS=Mus musculus OX=10090 GN=Aldh1b1 PE=1 SV=1
1957	TRUE	P62911|RL32_MOUSE	38.56	29.63	5	5		4652.55	5622.18	5641.84	5305.53	2034.38	2026.88	2132.97	2064.74	0.389168	0.000591028	15860	60S ribosomal protein L32 OS=Mus musculus OX=10090 GN=Rpl32 PE=1 SV=2
2844	TRUE	Q8BNN1|SPA2L_MOUSE	1.29	3.52	1	1		262.852	158.353	137.39	186.198	286.129	254.863	113.562	218.184	1.17179	0.652091	46772	Spermatogenesis-associated protein 2-like protein OS=Mus musculus OX=10090 GN=Spata2l PE=1 SV=1
627	TRUE	F8VPU2|FARP1_MOUSE	18.27	10.31	10	10	Acetylation (Protein N-term)	3546.53	3159.57	3190.64	3298.91	2216.43	2516.75	2715.9	2483.03	0.75268	0.012934	118875	FERM, ARHGEF and pleckstrin domain-containing protein 1 OS=Mus musculus OX=10090 GN=Farp1 PE=1 SV=1
828	TRUE	Q91WJ8|FUBP1_MOUSE	20.38	10.75	7	6		1344.8	1098.45	1257.49	1233.58	656.685	783.873	510.151	650.236	0.527113	0.00550466	68540	Far upstream element-binding protein 1 OS=Mus musculus OX=10090 GN=Fubp1 PE=1 SV=1
2600	TRUE	Q91WT9|CBS_MOUSE	3.24	3.74	2	2		227.009	345.176	216.412	262.866	131.933	235.842	284.439	217.405	0.827057	0.497808	61544	Cystathionine beta-synthase OS=Mus musculus OX=10090 GN=Cbs PE=1 SV=3
2547	TRUE	Q91WA3|HDA11_MOUSE	6.17	3.75	1	1		188.522	98.726	171.623	152.957	124.852	114.818	85.955	108.542	0.709622	0.211804	39157	Histone deacetylase 11 OS=Mus musculus OX=10090 GN=Hdac11 PE=1 SV=1
989	TRUE	P63011|RAB3A_MOUSE	26.82	28.64	6	4	Oxidation (M)	4354.43	4868.99	4902.96	4708.79	1335.02	2156.51	1692.65	1728.06	0.366985	0.000552155	24970	Ras-related protein Rab-3A OS=Mus musculus OX=10090 GN=Rab3a PE=1 SV=1
647	TRUE	P14094|AT1B1_MOUSE	28.71	26.64	11	11		207421	208765	207700	207962	132516	122432	104508	119819	0.576157	0.00042469	35195	Sodium/potassium-transporting ATPase subunit beta-1 OS=Mus musculus OX=10090 GN=Atp1b1 PE=1 SV=1
4197	TRUE	Q0VGY8|TANC1_MOUSE	5.22	0.59	1	1		77.0312	59.038	105.725	80.5979	95.9176	118.598	84.6914	99.7356	1.23745	0.319744	200805	Protein TANC1 OS=Mus musculus OX=10090 GN=Tanc1 PE=1 SV=2
2905	TRUE	Q9DB29|IAH1_MOUSE	21.39	7.23	2	2	Acetylation (Protein N-term)	381.091	379.908	386.387	382.462	530.187	674.301	753.426	652.638	1.70641	0.0144641	27974	Isoamyl acetate-hydrolyzing esterase 1 homolog OS=Mus musculus OX=10090 GN=Iah1 PE=1 SV=1
445	TRUE	O88844|IDHC_MOUSE	49.83	37.92	18	17		4599.93	5123.1	4744.6	4822.54	1313.24	1466.69	1370.34	1383.42	0.286866	2.93062e-05	46674	Isocitrate dehydrogenase [NADP] cytoplasmic OS=Mus musculus OX=10090 GN=Idh1 PE=1 SV=2
756	TRUE	Q07076|ANXA7_MOUSE	23.81	22.03	10	10		3085.28	4544.31	4510.01	4046.53	1922.17	1741.83	1863.92	1842.64	0.455363	0.0103645	49925	Annexin A7 OS=Mus musculus OX=10090 GN=Anxa7 PE=1 SV=2
626	TRUE	Q9ESN6|TRIM2_MOUSE	17.26	22.04	12	12		2756.45	3837.29	4222.29	3605.34	788.341	1850.44	719.512	1119.43	0.310493	0.0121517	81445	Tripartite motif-containing protein 2 OS=Mus musculus OX=10090 GN=Trim2 PE=1 SV=1
1770	TRUE	Q91XV3|BASP1_MOUSE	28.14	41.59	5	5		1073.37	907.483	1076.25	1019.03	573.003	514.197	450.531	512.577	0.503003	0.00155484	22087	Brain acid soluble protein 1 OS=Mus musculus OX=10090 GN=Basp1 PE=1 SV=3
1402	FALSE	Q9EST5|AN32B_MOUSE	12.3	2.94	1	1		344.901	487.913	342.844	391.886	242.851	288.156	293.717	274.908	0.7015	0.0820629	31079	Acidic leucine-rich nuclear phosphoprotein 32 family member B OS=Mus musculus OX=10090 GN=Anp32b PE=1 SV=1
1822	TRUE	Q9DC61|MPPA_MOUSE	22.01	5.92	3	3		760.753	820.799	761.038	780.863	490.425	386.435	530.578	469.146	0.600805	0.00275962	58279	Mitochondrial-processing peptidase subunit alpha OS=Mus musculus OX=10090 GN=Pmpca PE=1 SV=1
1892	TRUE	A2ASZ8|SCMC2_MOUSE	10.73	4.26	2	2		538.459	585.235	467.269	530.321	180.967	352.478	401.59	311.678	0.587717	0.0437158	52621	Calcium-binding mitochondrial carrier protein SCaMC-2 OS=Mus musculus OX=10090 GN=Slc25a25 PE=1 SV=1
1658	FALSE	Q9JK88|SPI2_MOUSE	10.92	2.47	1	1		85.0421	162.402	126.722	124.722	65.5478	62.5498	18.6569	48.9182	0.392217	0.0484754	45776	Serpin I2 OS=Mus musculus OX=10090 GN=Serpini2 PE=1 SV=1
2473	TRUE	Q9CPP6|NDUA5_MOUSE	20.02	14.66	3	3		1168.1	1324.52	1475.7	1322.77	785.511	449.912	485.359	573.594	0.43363	0.00567623	13360	NADH dehydrogenase [ubiquinone] 1 alpha subcomplex subunit 5 OS=Mus musculus OX=10090 GN=Ndufa5 PE=1 SV=3
287	TRUE	Q62188|DPYL3_MOUSE	19.73	34.56	16	12	Oxidation (M)	10684.1	12085.6	11763	11510.9	7016.47	6477.82	4389.15	5961.15	0.517869	0.00360381	61936	Dihydropyrimidinase-related protein 3 OS=Mus musculus OX=10090 GN=Dpysl3 PE=1 SV=1
198	TRUE	P08553|NFM_MOUSE	19.35	30.66	25	22	Acetylation (Protein N-term)	10064.5	9403.64	9824.4	9764.18	6546.82	5158.55	3958.25	5221.21	0.534731	0.00417706	95916	Neurofilament medium polypeptide OS=Mus musculus OX=10090 GN=Nefm PE=1 SV=4
1401	TRUE	Q8BWY3|ERF1_MOUSE	4.9	13.04	5	5		2216.16	1995.17	1721.12	1977.48	1979.97	1589.25	1742.11	1770.44	0.895301	0.32071	49031	Eukaryotic peptide chain release factor subunit 1 OS=Mus musculus OX=10090 GN=Etf1 PE=1 SV=4
2837	TRUE	Q5SYL3|BLTP2_MOUSE	0.59	0.4	1	1		302.762	180.928	419.353	301.014	284.837	316.86	288.87	296.856	0.986185	0.9552	254469	Bridge-like lipid transfer protein family member 2 OS=Mus musculus OX=10090 GN=Bltp2 PE=1 SV=1
2897	TRUE	Q99JW4|LIMS1_MOUSE	24.41	5.85	2	2		586.294	624.424	720.535	643.751	141.169	189.587	269.223	199.993	0.310668	0.00125258	37240	LIM and senescent cell antigen-like-containing domain protein 1 OS=Mus musculus OX=10090 GN=Lims1 PE=1 SV=3
160	TRUE	P16858|G3P_MOUSE	47.99	54.35	16	16	N-ethylmaleimide on cysteines; Oxidation (M)	390054	389386	387361	388934	233760	237056	221260	230692	0.593139	5.38742e-06	35810	Glyceraldehyde-3-phosphate dehydrogenase OS=Mus musculus OX=10090 GN=Gapdh PE=1 SV=2
352	TRUE	Q5RJI5|BRSK1_MOUSE	7.73	24.55	18	16		1919.28	1747.19	1652.73	1773.07	1578.72	1706.76	1313.29	1532.92	0.864559	0.160715	85155	Serine/threonine-protein kinase BRSK1 OS=Mus musculus OX=10090 GN=Brsk1 PE=1 SV=1
259	TRUE	Q8CGY8|OGT1_MOUSE	33.92	18.93	20	20	Acetylation (Protein N-term)	3054.4	2725.16	3289.2	3022.92	1513.24	1306.63	1433.32	1417.73	0.468994	0.000772261	116952	UDP-N-acetylglucosamine--peptide N-acetylglucosaminyltransferase 110 kDa subunit OS=Mus musculus OX=10090 GN=Ogt PE=1 SV=2
1776	TRUE	P59999|ARPC4_MOUSE	45.77	27.98	5	5		14762.6	13296.7	13862.9	13974.1	6688.42	6631.71	6938.46	6752.86	0.483242	7.85927e-05	19667	Actin-related protein 2/3 complex subunit 4 OS=Mus musculus OX=10090 GN=Arpc4 PE=1 SV=3
316	TRUE	P83510|TNIK_MOUSE	5.26	7.26	17	7		872.941	1307.09	1319.33	1166.46	1040.72	987.694	864.069	964.162	0.826574	0.264072	150367	Traf2 and NCK-interacting protein kinase OS=Mus musculus OX=10090 GN=Tnik PE=1 SV=2
3759	TRUE	P00158|CYB_MOUSE	26.82	2.36	1	1		1422	1813.93	1474.2	1570.04	822.603	634.69	744.908	734.067	0.467547	0.0034031	43210	Cytochrome b OS=Mus musculus OX=10090 GN=Mt-Cyb PE=1 SV=1
1988	FALSE	Q9JIW9|RALB_MOUSE	29.04	8.74	2	2	Oxidation (M)	1789.36	2097.87	1977.02	1954.75	401.516	474.986	241.533	372.678	0.190653	0.00015182	23349	Ras-related protein Ral-B OS=Mus musculus OX=10090 GN=Ralb PE=1 SV=1
184	FALSE	Q148W0|AT8B1_MOUSE	5.64	0.72	1	1		318.114	515.517	541.977	458.536	607.928	529.158	539.008	558.698	1.21844	0.251824	143798	Phospholipid-transporting ATPase IC OS=Mus musculus OX=10090 GN=Atp8b1 PE=1 SV=2
1507	TRUE	Q9CZW4|ACSL3_MOUSE	0.3	7.92	5	4		676.923	1830.32	402.718	969.987	1885.01	368.392	602.412	951.936	0.981391	0.978951	80492	Fatty acid CoA ligase Acsl3 OS=Mus musculus OX=10090 GN=Acsl3 PE=1 SV=2
2141	FALSE	O08967|CYH3_MOUSE	17.55	4.51	2	2		356.916	461.595	375.634	398.048	297.297	289.399	281.928	289.541	0.727402	0.0289643	46280	Cytohesin-3 OS=Mus musculus OX=10090 GN=Cyth3 PE=1 SV=1
3009	TRUE	P63300|SELW_MOUSE	27.15	21.59	2	2		2499.84	2439.23	2251.46	2396.84	3000.14	3071.51	3013.49	3028.38	1.26349	0.00125925	9656	Selenoprotein W OS=Mus musculus OX=10090 GN=Selenow PE=1 SV=3
1644	TRUE	Q9Z2M7|PMM2_MOUSE	9.27	9.5	3	2		180.866	240.124	319.785	246.925	199.92	128.915	156.421	161.752	0.655067	0.132894	27657	Phosphomannomutase 2 OS=Mus musculus OX=10090 GN=Pmm2 PE=1 SV=1
2252	TRUE	Q9DBY1|SYVN1_MOUSE	2.86	2.61	2	2		640.557	679.978	559.189	626.575	492.426	658.76	602.21	584.465	0.932794	0.524136	67296	E3 ubiquitin-protein ligase synoviolin OS=Mus musculus OX=10090 GN=Syvn1 PE=1 SV=3
4098	TRUE	Q9R087|GPC6_MOUSE	4.27	1.44	1	1		150.581	223.887	98.2678	157.578	121.533	103.071	126.559	117.054	0.742833	0.336366	63057	Glypican-6 OS=Mus musculus OX=10090 GN=Gpc6 PE=1 SV=1
3767	TRUE	Q5FW52|MLIP_MOUSE	9.02	5.95	1	1		195.102	177.345	113.349	161.932	78.7875	97.7389	134.913	103.813	0.641093	0.122925	29466	Muscular LMNA-interacting protein OS=Mus musculus OX=10090 GN=Mlip PE=1 SV=1
2093	TRUE	Q9JLR1|S61A2_MOUSE	7.45	6.51	3	3		649.456	895.973	896.109	813.846	645.982	678.353	697.928	674.088	0.828274	0.169808	52248	Protein transport protein Sec61 subunit alpha isoform 2 OS=Mus musculus OX=10090 GN=Sec61a2 PE=2 SV=3
1275	TRUE	Q9QZQ8|H2AY_MOUSE	23.58	20.05	7	6		1578.71	1694.48	1771.06	1681.42	891.24	621.17	523.251	678.554	0.403561	0.00124784	39290	Core histone macro-H2A.1 OS=Mus musculus OX=10090 GN=Macroh2a1 PE=1 SV=4
528	TRUE	Q9ER72|SYCC_MOUSE	25.74	12.03	9	9		987.308	1184.2	1141.37	1104.29	761.317	767.365	740.505	756.395	0.68496	0.00448972	94860	Cysteine--tRNA ligase, cytoplasmic OS=Mus musculus OX=10090 GN=Cars1 PE=1 SV=2
9	TRUE	Q8C8R3|ANK2_MOUSE	7.56	19.73	76	66	Oxidation (M)	18027.6	18290.3	15955.6	17424.5	16624	16045.5	15675.1	16114.8	0.924837	0.171959	426261	Ankyrin-2 OS=Mus musculus OX=10090 GN=Ank2 PE=1 SV=2
1711	TRUE	P18052|PTPRA_MOUSE	4.67	5.55	5	4		275.191	506.606	409.648	397.148	317.403	277.322	349.539	314.755	0.792536	0.306061	93698	Receptor-type tyrosine-protein phosphatase alpha OS=Mus musculus OX=10090 GN=Ptpra PE=1 SV=3
1958	TRUE	Q01063|PDE4D_MOUSE	36.52	5.09	3	3		1065.69	1203.43	1134.58	1134.57	689.968	649.88	635.248	658.365	0.580279	0.000377958	84563	cAMP-specific 3',5'-cyclic phosphodiesterase 4D OS=Mus musculus OX=10090 GN=Pde4d PE=1 SV=2
248	TRUE	P47708|RP3A_MOUSE	21	35.1	19	19	Oxidation (M)	17169.2	8925.38	10358.2	12150.9	4702.92	4176.93	3897.84	4259.23	0.350527	0.0365738	75489	Rabphilin-3A OS=Mus musculus OX=10090 GN=Rph3a PE=1 SV=2
970	FALSE	Q149F3|ERF3B_MOUSE	9.34	7.28	4	4		1324.36	1606.72	1449.74	1460.27	954.109	522.232	1259.04	911.793	0.624399	0.074602	69147	Eukaryotic peptide chain release factor GTP-binding subunit ERF3B OS=Mus musculus OX=10090 GN=Gspt2 PE=1 SV=1
2220	TRUE	P70195|PSB7_MOUSE	12.9	11.55	3	3		1629.97	3464.65	2193.73	2429.45	1183.78	741.464	1347.67	1090.97	0.449062	0.0793758	29891	Proteasome subunit beta type-7 OS=Mus musculus OX=10090 GN=Psmb7 PE=1 SV=1
1358	TRUE	O09131|GSTO1_MOUSE	31.09	34.58	8	8		2231.29	2175.84	2314.97	2240.7	1166.1	1040.36	1318.29	1174.92	0.524352	0.00029054	27498	Glutathione S-transferase omega-1 OS=Mus musculus OX=10090 GN=Gsto1 PE=1 SV=2
295	TRUE	Q9ES97|RTN3_MOUSE	23.51	20.33	18	17		28109	25973.2	24315.6	26132.6	15454	18838.2	15284.6	16525.6	0.632375	0.0038305	103879	Reticulon-3 OS=Mus musculus OX=10090 GN=Rtn3 PE=1 SV=2
1217	TRUE	Q99MI1|RB6I2_MOUSE	8.07	1.07	6	1		122.68	138.565	109.813	123.686	146.886	137.849	134.469	139.735	1.12975	0.152703	128331	ELKS/Rab6-interacting/CAST family member 1 OS=Mus musculus OX=10090 GN=Erc1 PE=1 SV=1
1113	TRUE	Q5SSH7|ZZEF1_MOUSE	16.2	1.78	3	3		438.597	404.375	556.499	466.49	343.401	314.021	316.354	324.592	0.695817	0.0392734	328312	Zinc finger ZZ-type and EF-hand domain-containing protein 1 OS=Mus musculus OX=10090 GN=Zzef1 PE=1 SV=2
394	TRUE	Q8VEK3|HNRPU_MOUSE	33.26	16.75	16	16	Oxidation (M)	20790.1	22184.2	22738	21904.1	14096.1	13506.6	15054.7	14219.1	0.649153	0.000471291	87918	Heterogeneous nuclear ribonucleoprotein U OS=Mus musculus OX=10090 GN=Hnrnpu PE=1 SV=1
1416	FALSE	Q8C9H6|STRP2_MOUSE	0.68	1.18	1	1		422.583	709.649	381.654	504.629	421.513	662.443	350.118	478.025	0.94728	0.858453	96294	Striatin-interacting proteins 2 OS=Mus musculus OX=10090 GN=Strip2 PE=1 SV=1
1393	TRUE	Q0GA42|CNNM1_MOUSE	12.84	0.95	2	1		115.854	110.107	110.922	112.294	74.1619	67.1722	101.47	80.9347	0.720738	0.041814	103980	Metal transporter CNNM1 OS=Mus musculus OX=10090 GN=Cnnm1 PE=1 SV=5
491	TRUE	Q8K010|OPLA_MOUSE	15.86	9.86	10	10		699.991	971.012	704.249	791.751	391.611	492.126	546.319	476.685	0.602065	0.0349593	137611	5-oxoprolinase OS=Mus musculus OX=10090 GN=Oplah PE=1 SV=1
1708	TRUE	P23492|PNPH_MOUSE	29.39	6.92	2	2		919.908	1125.1	1069.92	1038.31	529.871	599.008	587.882	572.254	0.55114	0.00199684	32277	Purine nucleoside phosphorylase OS=Mus musculus OX=10090 GN=Pnp PE=1 SV=2
1379	TRUE	O55042|SYUA_MOUSE	49.71	36.43	6	4		6643.45	6289.7	6501.34	6478.17	2237.92	2474.69	2228.97	2313.86	0.357179	5.75257e-06	14485	Alpha-synuclein OS=Mus musculus OX=10090 GN=Snca PE=1 SV=2
102	TRUE	Q64514|TPP2_MOUSE	7.71	29.56	33	33	N-ethylmaleimide on cysteines; Oxidation (M)	5458.54	5128.4	5545.84	5377.59	5191.7	4724.76	5191.66	5036.04	0.936486	0.164429	139879	Tripeptidyl-peptidase 2 OS=Mus musculus OX=10090 GN=Tpp2 PE=1 SV=3
2842	TRUE	Q9D8B3|CHM4B_MOUSE	8.03	6.25	1	1		196.543	263.721	327.034	262.433	201.793	162.617	54.2223	139.544	0.531733	0.1016	24936	Charged multivesicular body protein 4b OS=Mus musculus OX=10090 GN=Chmp4b PE=1 SV=2
3715	TRUE	P56375|ACYP2_MOUSE	3.13	8.49	1	1		2267.21	192.415	2685.51	1715.04	1957	2010.1	2106.91	2024.67	1.18054	0.708896	11878	Acylphosphatase-2 OS=Mus musculus OX=10090 GN=Acyp2 PE=1 SV=2
1997	TRUE	Q08642|PADI2_MOUSE	10.65	3.86	2	2		284.59	667.275	1123.8	691.888	127.951	259.11	268.228	218.429	0.315701	0.127471	76250	Protein-arginine deiminase type-2 OS=Mus musculus OX=10090 GN=Padi2 PE=1 SV=2
3206	TRUE	Q80YV3|TRRAP_MOUSE	5.45	0.51	1	1		62.9569	102.769	100.808	88.8446	18.6569	115.889	111.151	81.8987	0.921819	0.848969	291557	Transformation/transcription domain-associated protein OS=Mus musculus OX=10090 GN=Trrap PE=1 SV=2
753	TRUE	Q9Z1Z2|STRAP_MOUSE	23.11	28.86	8	8		2336.88	2611.91	2592.1	2513.63	1128.39	1089	1580.93	1266.11	0.503696	0.00232175	38442	Serine-threonine kinase receptor-associated protein OS=Mus musculus OX=10090 GN=Strap PE=1 SV=2
67	TRUE	Q811P8|RHG32_MOUSE	1.36	16.28	31	29		5351.44	5015.34	4916.84	5094.54	4946.18	5157.41	5013.07	5038.89	0.989076	0.721687	229719	Rho GTPase-activating protein 32 OS=Mus musculus OX=10090 GN=Arhgap32 PE=1 SV=2
1178	TRUE	Q8R1B4|EIF3C_MOUSE	14.15	10.54	9	9		1073.79	1255.09	1133.65	1154.17	990.123	862.17	734.187	862.16	0.746993	0.0327545	105531	Eukaryotic translation initiation factor 3 subunit C OS=Mus musculus OX=10090 GN=Eif3c PE=1 SV=1
673	TRUE	Q61696|HS71A_MOUSE	26.84	6.24	10	3		759.267	930.172	872.539	853.993	212.189	197.853	336.513	248.852	0.291398	0.000821498	70079	Heat shock 70 kDa protein 1A OS=Mus musculus OX=10090 GN=Hspa1a PE=1 SV=2
2186	TRUE	Q8K1Z0|COQ9_MOUSE	14.7	2.88	1	1		367.077	384.135	438.676	396.63	219.372	230.171	328.745	259.429	0.654085	0.0285632	35083	Ubiquinone biosynthesis protein COQ9, mitochondrial OS=Mus musculus OX=10090 GN=Coq9 PE=1 SV=1
2568	TRUE	D3Z6Q9|BIN2_MOUSE	18.41	2.86	3	1	Acetylation (Protein N-term)	175.137	250.03	170.737	198.635	123.137	105.019	93.4297	107.195	0.53966	0.028073	52554	Bridging integrator 2 OS=Mus musculus OX=10090 GN=Bin2 PE=1 SV=1
917	TRUE	Q9ESW4|AGK_MOUSE	10.19	24.23	9	9		1506.54	1352.13	1919.36	1592.68	1139.31	1038.21	1383.46	1186.99	0.745281	0.109712	46976	Acylglycerol kinase, mitochondrial OS=Mus musculus OX=10090 GN=Agk PE=1 SV=1
630	TRUE	Q99K85|SERC_MOUSE	53.16	35.68	13	13		11153.1	11146.7	11431.4	11243.8	5302.15	5673.81	5417	5464.32	0.485987	2.33441e-06	40473	Phosphoserine aminotransferase OS=Mus musculus OX=10090 GN=Psat1 PE=1 SV=1
1943	TRUE	Q80TB8|VAT1L_MOUSE	24.87	6.24	3	3		1452.11	1421.34	1371.64	1415.03	1023.47	804.465	876.136	901.356	0.636987	0.00170081	45817	Synaptic vesicle membrane protein VAT-1 homolog-like OS=Mus musculus OX=10090 GN=Vat1l PE=1 SV=2
1901	FALSE	P52912|TIA1_MOUSE	1.23	2.85	1	1		305.82	423.02	122.724	283.855	224.811	178.542	266.908	223.42	0.787094	0.543073	42800	Cytotoxic granule associated RNA binding protein TIA1 OS=Mus musculus OX=10090 GN=Tia1 PE=1 SV=1
1298	TRUE	Q9D2M8|UB2V2_MOUSE	35.25	24.83	7	3		1032.39	904.723	987.653	974.924	444.842	510.73	435.455	463.675	0.475602	0.000321084	16367	Ubiquitin-conjugating enzyme E2 variant 2 OS=Mus musculus OX=10090 GN=Ube2v2 PE=1 SV=4
1263	TRUE	P04370|MBP_MOUSE	31.19	28.8	8	8	Oxidation (M)	228996	229510	218144	225550	179958	172228	165775	172653	0.765476	0.000665667	27168	Myelin basic protein OS=Mus musculus OX=10090 GN=Mbp PE=1 SV=2
2324	TRUE	Q8BX10|PGAM5_MOUSE	16.96	6.6	2	2		1363.17	1319.55	1306.9	1329.87	2144.37	2029.68	1576.88	1916.98	1.44148	0.0279751	31994	Serine/threonine-protein phosphatase PGAM5, mitochondrial OS=Mus musculus OX=10090 GN=Pgam5 PE=1 SV=1
1008	TRUE	Q7TT37|ELP1_MOUSE	1.82	7.2	8	8		236.942	537.304	473.524	415.923	579.512	399.874	391.501	456.962	1.09867	0.728101	149584	Elongator complex protein 1 OS=Mus musculus OX=10090 GN=Elp1 PE=1 SV=2
1117	TRUE	Q99PJ0|NTRI_MOUSE	75.73	24.71	8	8		21592	21642.5	21152.4	21462.3	7952.98	7911.61	8009.72	7958.11	0.370795	1.12977e-07	37984	Neurotrimin OS=Mus musculus OX=10090 GN=Ntm PE=1 SV=2
344	TRUE	Q9WU78|PDC6I_MOUSE	10.69	23.82	20	20		2503.94	1998.35	2018.11	2173.47	1912.55	1002.87	1338.17	1417.86	0.652351	0.0731481	96024	Programmed cell death 6-interacting protein OS=Mus musculus OX=10090 GN=Pdcd6ip PE=1 SV=3
1449	TRUE	Q8BLQ9|CADM2_MOUSE	26.31	10.11	4	4		1698.61	1951.99	2010.66	1887.09	826.275	663.988	973.111	821.125	0.435128	0.00123774	47559	Cell adhesion molecule 2 OS=Mus musculus OX=10090 GN=Cadm2 PE=1 SV=2
408	TRUE	Q8C1A5|THOP1_MOUSE	37.5	24.6	15	15		3717.99	3647.28	3431.33	3598.87	1603.58	1603.64	1339.81	1515.68	0.421154	7.16037e-05	78026	Thimet oligopeptidase OS=Mus musculus OX=10090 GN=Thop1 PE=1 SV=1
559	TRUE	Q9D5V5|CUL5_MOUSE	21.42	13.97	10	10		64169.3	68398.6	65884.5	66150.8	53038.1	55437.8	58575.9	55684	0.841773	0.00659502	90974	Cullin-5 OS=Mus musculus OX=10090 GN=Cul5 PE=1 SV=3
340	FALSE	Q91Z96|BMP2K_MOUSE	3.41	0.62	1	1		1937.14	1924.32	2130.94	1997.47	1688.07	1926.24	2065.79	1893.37	0.947884	0.464755	126185	BMP-2-inducible protein kinase OS=Mus musculus OX=10090 GN=Bmp2k PE=1 SV=1
1927	TRUE	P45878|FKBP2_MOUSE	37.94	22.86	4	4		3412.54	3531.62	3146.28	3363.48	960.953	1097.08	818.086	958.705	0.285034	6.64655e-05	15344	Peptidyl-prolyl cis-trans isomerase FKBP2 OS=Mus musculus OX=10090 GN=Fkbp2 PE=1 SV=1
3465	TRUE	Q6DIC0|SMCA2_MOUSE	6.55	0.82	1	1		111.963	157.338	105.551	124.951	153.473	161.186	135.156	149.939	1.19998	0.238141	180253	Probable global transcription activator SNF2L2 OS=Mus musculus OX=10090 GN=Smarca2 PE=1 SV=1
405	TRUE	Q8BG05|ROA3_MOUSE	51.08	32.98	14	12	Acetylation (Protein N-term); Oxidation (M)	20382.4	21166.3	20904.7	20817.8	6349.96	7036.67	7109.07	6831.9	0.328176	1.94571e-06	39652	Heterogeneous nuclear ribonucleoprotein A3 OS=Mus musculus OX=10090 GN=Hnrnpa3 PE=1 SV=1
886	FALSE	Q9D4J1|EFHD1_MOUSE	14.87	8.75	2	2		1791.6	1828.8	1048.06	1556.16	916.798	440.337	559.57	638.902	0.410564	0.0347324	27000	EF-hand domain-containing protein D1 OS=Mus musculus OX=10090 GN=Efhd1 PE=1 SV=1
37	TRUE	Q9QWI6|SRCN1_MOUSE	10.72	41.52	45	45		8390.68	7229.02	7707.75	7775.82	6989.01	7003.08	7097.52	7029.87	0.904068	0.0924611	134859	SRC kinase signaling inhibitor 1 OS=Mus musculus OX=10090 GN=Srcin1 PE=1 SV=2
2416	TRUE	Q921E2|RAB31_MOUSE	26.31	5.15	2	1		220.881	237.222	250.453	236.185	91.6691	54.6724	85.395	77.2455	0.327055	0.000370385	21331	Ras-related protein Rab-31 OS=Mus musculus OX=10090 GN=Rab31 PE=1 SV=1
413	TRUE	Q9CYT6|CAP2_MOUSE	45.83	33.4	16	15	Oxidation (M)	9360.46	9613.56	8938.94	9304.32	3897.96	4334.3	4134.37	4122.21	0.443043	2.44858e-05	52862	Adenylyl cyclase-associated protein 2 OS=Mus musculus OX=10090 GN=Cap2 PE=1 SV=1
222	TRUE	P40142|TKT_MOUSE	50.61	34.67	21	21	Acetylation (Protein N-term); Oxidation (M)	22004.3	21381.6	21965.8	21783.9	10425.9	11188.3	10463.5	10692.5	0.490846	4.11354e-06	67630	Transketolase OS=Mus musculus OX=10090 GN=Tkt PE=1 SV=1
1187	TRUE	P11276|FINC_MOUSE	10.38	2.7	5	5		358.068	353.823	468.254	393.382	442.89	514.79	527.148	494.943	1.25817	0.0906216	272538	Fibronectin OS=Mus musculus OX=10090 GN=Fn1 PE=1 SV=4
964	TRUE	Q4JIM5|ABL2_MOUSE	9.78	5.25	5	5		413.156	497.722	468.027	459.635	365.771	419.157	407.994	397.641	0.865122	0.10455	128196	Tyrosine-protein kinase ABL2 OS=Mus musculus OX=10090 GN=Abl2 PE=1 SV=1
2965	TRUE	P81269|ATF1_MOUSE	42.57	2.6	1	1		940.085	1102.6	1011.76	1018.15	379.631	413.105	397.154	396.63	0.38956	0.000205305	29238	Cyclic AMP-dependent transcription factor ATF-1 OS=Mus musculus OX=10090 GN=Atf1 PE=1 SV=1
1242	TRUE	O70172|PI42A_MOUSE	24.44	8.15	8	3		1900.41	1921.51	1975.43	1932.45	566.872	960.021	592.471	706.455	0.365575	0.000683095	46152	Phosphatidylinositol 5-phosphate 4-kinase type-2 alpha OS=Mus musculus OX=10090 GN=Pip4k2a PE=1 SV=1
1273	TRUE	P20917|MAG_MOUSE	23.67	14.04	7	7		7695.73	8212.99	6009.06	7305.92	3905.57	4171.51	3491.96	3856.34	0.527838	0.00765435	69388	Myelin-associated glycoprotein OS=Mus musculus OX=10090 GN=Mag PE=1 SV=3
3130	TRUE	P59108|CPNE2_MOUSE	5.34	1.64	2	1		77.4022	177.544	176.934	143.96	144.688	224.24	237.256	202.062	1.40359	0.258044	61036	Copine-2 OS=Mus musculus OX=10090 GN=Cpne2 PE=1 SV=1
791	TRUE	O08759|UBE3A_MOUSE	17.23	10.46	8	8		1024.18	1127.75	1161.25	1104.39	375.497	579.076	704.503	553.025	0.50075	0.00615763	99819	Ubiquitin-protein ligase E3A OS=Mus musculus OX=10090 GN=Ube3a PE=1 SV=2
3197	TRUE	Q9QXK3|COPG2_MOUSE	2.25	2.18	2	2		461.407	318.883	293.939	358.077	291.825	349.848	327.889	323.187	0.902565	0.559216	97680	Coatomer subunit gamma-2 OS=Mus musculus OX=10090 GN=Copg2 PE=1 SV=1
2045	TRUE	Q61097|KSR1_MOUSE	3.24	1.95	2	2		249.173	300.775	238.129	262.693	255.919	179.618	273.203	236.247	0.899327	0.487638	96755	Kinase suppressor of Ras 1 OS=Mus musculus OX=10090 GN=Ksr1 PE=1 SV=1
50	TRUE	Q04690|NF1_MOUSE	5.83	11.47	32	32		2626.07	1968.54	2479.35	2357.99	2923.48	2898.99	2354.62	2725.7	1.15594	0.248338	319596	Neurofibromin OS=Mus musculus OX=10090 GN=Nf1 PE=1 SV=1
2437	TRUE	P61793|LPAR1_MOUSE	0.92	3.02	1	1		215.398	186.492	1064.77	488.885	202.047	975.979	378.621	518.882	1.06136	0.939478	41119	Lysophosphatidic acid receptor 1 OS=Mus musculus OX=10090 GN=Lpar1 PE=1 SV=1
80	TRUE	Q64521|GPDM_MOUSE	39.08	44.29	33	33	Oxidation (M)	14235.4	13285.5	13657.4	13726.1	8956.68	8239.52	8390.7	8528.97	0.621368	0.000122714	80954	Glycerol-3-phosphate dehydrogenase, mitochondrial OS=Mus musculus OX=10090 GN=Gpd2 PE=1 SV=2
649	TRUE	Q8C8N2|SCAI_MOUSE	38.35	20.63	11	11		2404.72	2583.84	2170.95	2386.5	1099.2	1137.23	1055.98	1097.47	0.459865	0.000451372	70275	Protein SCAI OS=Mus musculus OX=10090 GN=Scai PE=1 SV=2
1470	TRUE	Q9Z1K5|ARI1_MOUSE	24.81	9.73	5	5		810.801	803.232	737.955	783.996	371.715	293.676	442.004	369.132	0.470834	0.00104018	64017	E3 ubiquitin-protein ligase ARIH1 OS=Mus musculus OX=10090 GN=Arih1 PE=1 SV=3
1690	TRUE	Q99PL6|UBXN6_MOUSE	15.51	15.61	6	6		994.532	1204.29	1478.33	1225.72	824.352	847.982	738.197	803.51	0.655544	0.0427199	49796	UBX domain-containing protein 6 OS=Mus musculus OX=10090 GN=Ubxn6 PE=1 SV=1
2539	TRUE	Q9WTX2|PRKRA_MOUSE	3.57	4.79	1	1		210.328	265.125	209.213	228.222	49.2503	253.072	233.887	178.736	0.783168	0.504425	34371	Interferon-inducible double-stranded RNA-dependent protein kinase activator A OS=Mus musculus OX=10090 GN=Prkra PE=1 SV=1
634	TRUE	Q9WUA2|SYFB_MOUSE	21.14	22.41	13	13		1649.33	1768.6	1526.83	1648.26	988.046	1141.96	817.193	982.4	0.596024	0.00469589	65697	Phenylalanine--tRNA ligase beta subunit OS=Mus musculus OX=10090 GN=Farsb PE=1 SV=2
[truncated: 1,473 more rows]

## Sheet: Supplementary Table 3
Supplementary Table 3: The LFQ data of CCP samples.
[truncated: 2,008 more rows]

## Sheet: Supplementary Table 4
Supplementary Table 4: Identification of potential S-acylated proteins in CCC and CCP samples.
[truncated: 30 more rows]

## Sheet: Supplementary Table 5
Supplementary Table 5: The LFQ data of cerebral cortex samples.
[truncated: 1,741 more rows]

[truncated: 2 more sheets: Supplementary Table 6, Supplementary Table 7]
